# Supplementary material for: Comparative Analysis of Vertebrate Diurnal/Circadian Transcriptomes
Source: PLoS One. 2017 Jan 11;12(1):e0169923. doi: 10.1371/journal.pone.0169923 (PMC5226840; doi:10.1371/journal.pone.0169923)
Supplement: S1 Table — (XLSX) [file pone.0169923.s003.xlsx]

## Sheet: HAYSTACK_DART
f1	d1	d2	d3	d4	d5	d6	d7	d8	d9	d10	d11	d12	phase_haystack	BESTMODEL	CORREL	TSTAT	TPROB
ENSDART00000000102	149.274	172.005	80.0879	92.9489	38.1805	106.854	138.265	184.296	120.319	82.4582	80.5544	84.2291	3	ct03-rigid	.90637538615667900821	6.7843598044982202921	.000024164000000000001071
ENSDART00000000160	641.903	715.12	618.602	412.541	472.524	552.475	849.773	544.145	543.054	148.049	327.351	793.217	3	cos_per_22_ph_3	.85182324765507899667	5.1423269606198003245	.00021813999999999999515
ENSDART00000000700	84.095	34.7603	22.7374	52.5602	27.9657	35.8708	72.64	32.8311	27.3891	30.3574	33.5021	27.2201	0	ct00-spike	.91731357199969598692	7.2854122274839197004	.000013230999999999999191
ENSDART00000000831	156.11	218.891	282.66	197.547	197.159	162.035	139.658	208.184	261.611	127.715	116.597	113.611	7	ct07-spike	.86041938188840094703	5.3393968200889796449	.00016426000000000000279
ENSDART00000001201	551.046	1164.61	1222.12	471.685	466.248	439.152	837.675	972.277	1333.37	1218.95	286.416	393.443	6	cos_per_25_ph_6	.87743451524640403427	5.7842655335957395835	.000088351999999999997052
ENSDART00000001331	277.242	241.285	607.222	320.08	217.697	186.511	257.066	285.798	504.997	547.008	135.336	92.0128	10	ct10-spike	.85376870320712705542	5.1855197435393902694	.00020488999999999999834
ENSDART00000001376	466.822	622.009	1127.35	651.921	478.321	543.592	368.477	608.573	963.548	1050.52	415.743	538.633	10	ct10-spike	.85873604676335302255	5.2995031535389598432	.00017389999999999999859
ENSDART00000001424	131.931	328.577	344.04	161.483	172.373	199.886	174.354	225.694	308.011	172.467	158.648	219.608	6	ct06-spike	.87554520828263004972	5.7307174449713000897	.000095060000000000001268
ENSDART00000001649	229.457	57.7307	35.547	28.6184	620.97	29.0197	166.889	51.4889	55.9155	93.2424	625.811	32.3891	16	ct16-spike	.96068131103335396848	10.941486359720700605	.00000034636999999999999732
ENSDART00000001691	36.6947	60.1385	26.024	87.8547	30.8435	118.854	35.227	25.996	65.0064	27.8468	60.1583	136.57	20	ct20-spike	.85242944796759201331	5.1557013844158596783	.00021394000000000000148
ENSDART00000002118	1730.59	3045.78	2014.72	1576.96	582.425	1442.3	1895.31	1856.83	1615.67	450.267	643.089	1781.45	5	cos_per_22_ph_5	.89156648771870594672	6.2253126497304798193	.000049078000000000000043
ENSDART00000002281	521.397	497.569	848.192	567.86	362.889	395.022	566.79	961.711	1173.38	360.829	318.66	471.554	7	ct07-spike	.83090952971448694964	4.7223778299211396359	.00040674999999999999351
ENSDART00000002398	36.6628	37.7168	88.197	33.6851	28.0801	32.1768	19.9108	25.7956	68.8271	53.0255	52.3768	26.0515	9	ct09-spike	.86774390396621703392	5.5210929417249499096	.00012708000000000000979
ENSDART00000002464	525.865	603.222	568.523	650.482	1833.45	546.198	804.581	704.973	577.499	188.781	1166.2	211.952	16	ct16-spike	.85452040192274303365	5.2024220544650896514	.00019995000000000000837
ENSDART00000002498	611.794	1031.51	725.217	568.856	496.663	516.21	574.849	768.973	691.184	165.223	232.797	570.658	5	cos_per_22_ph_5	.82923700332595795537	4.6918789705156402903	.00042600000000000000063
ENSDART00000002554	2307.11	1863.29	2436.26	1120.15	770.035	1259.05	2399.7	2171.05	2159.71	491.73	365.986	935.986	4	ct04-box1	.93585804091399604765	8.3985074651687501301	.0000038364000000000002334
ENSDART00000002691	42.2458	42.7806	16.5798	45.3441	51.2076	68.0846	83.9446	59.2312	27.4153	28.778	29.3848	24.4206	23	cos_per_28_ph_23	.81615641058679899711	4.4665533614812300556	.00060192000000000003748
ENSDART00000002924	313.531	539.231	171.603	378.837	351.691	192.482	356.006	503.649	282.432	150.482	255.586	137.601	3	ct03-spike	.82460407098258803327	4.6094743247027301081	.00048299999999999997666
ENSDART00000002985	1287.37	1325.8	1847.84	1106.03	1061.19	993.135	1244.17	1096.14	1881.19	1297.98	1160.5	1368.83	8	ct08-spike	.9143217379588960414	7.1393102537415096265	.000015722999999999998371
ENSDART00000003076	48.7034	62.1568	34.6814	24.9301	220.078	127.488	37.4157	24.9092	28.3267	66.0268	146.443	60.8609	17	ct17-spike	.91094053244208095244	6.9827483876638103411	.000018969000000000000835
ENSDART00000003156	153.01	224.598	236.16	111.403	64.5825	95.3782	85.7207	118.325	155.522	254.793	94.3807	107.431	6	cos_per_28_ph_6	.82161205430043104947	4.5578088204569802144	.00052282999999999995276
ENSDART00000003170	2286.55	1746.54	1956.25	955.166	495.295	467.366	1790.1	907.367	935.92	385.152	201.416	111.699	4	ct04-box1	.81864607506900799461	4.5077374148920199559	.00056475999999999997991
ENSDART00000003195	437.629	327.461	424.858	243.448	3072.31	585.507	485.471	401.473	657.008	214.863	1015.81	293.516	16	ct16-spike	.81248550719972001399	4.4071814548021102098	.00066010000000000005303
ENSDART00000003425	2301.25	3684.6	3270.92	2539.51	1350.72	2058.17	3305.56	3799.22	2463.61	1204.9	1260.24	1169.34	5	cos_per_23_ph_5	.90663415463282803763	6.7952333414739900519	.000023842999999999998554
ENSDART00000003428	2726.17	2793.59	2449.99	1931.06	1688.73	2146.34	3505.12	2707.98	2602.34	1221.52	1482.58	1334.95	3	ct03-box1	.89112474469728897297	6.2103177515935197306	.000050047999999999999226
ENSDART00000003493	135.168	381.079	380.376	385.058	376.301	272.771	172.267	302.583	422.282	362.784	265.345	404.192	12	ct12-box2	.84143887523214400126	4.9243119846376099957	.00030049999999999998587
ENSDART00000003505	224.194	322.451	332.336	184.64	133.2	133.694	267.426	226.637	300.096	226.013	154.755	127.785	5	cos_per_25_ph_5	.90927231204163494471	6.9086009436482296309	.000020752999999999999339
ENSDART00000003514	558.333	886.336	840.124	726.705	458.656	508.768	698.855	694.285	945.084	394.94	260.404	49.1822	6	ct06-box1	.83533556767877803484	4.8051099813190703003	.00035905000000000002669
ENSDART00000003666	1826.18	1641.71	2292.05	2812.47	983.13	1206.97	2110.61	2489.11	2350.86	399.216	685.74	2329.56	8	cos_per_20_ph_8	.81144335610455897712	4.3906104812806603377	.00067737999999999999601
ENSDART00000003701	597.058	925.4	509.109	596.196	526.835	548.468	684.456	720.459	544.961	356.045	372.179	401.093	3	ct03-spike	.83282038095643395881	4.7577292777632500531	.00038558999999999999959
ENSDART00000003926	456.991	1046.22	980.606	443.246	561.87	313.116	555.522	747.807	783.096	306.618	285.61	659.864	6	ct06-spike	.85081842904993698617	5.1203234083735100768	.0002252400000000000051
ENSDART00000003960	1796.21	1673.14	1502.43	1048.65	1228.06	954.245	1665.98	1351.49	1302.85	269.895	409.468	996.012	3	ct03-box1	.82888924802498598066	4.6855885840020601307	.00043008999999999999704
ENSDART00000004034	373.337	449.546	618.898	429.267	565.134	341.486	287.354	450.966	645.261	313.601	334.425	385.712	7	ct07-spike	.81024569766072396249	4.3717181620789897778	.00069766999999999995252
ENSDART00000004062	853.6	958.179	740.25	450.548	351.935	239.874	579.605	596.255	879.85	956.596	252.52	331.905	4	cos_per_28_ph_4	.9008346990845109703	6.5613478675971901311	.000031905000000000000309
ENSDART00000004108	170.497	224.715	284.384	167.392	180.6	154.592	194.127	164.834	344.513	132.623	85.6227	106.815	7	ct07-spike	.87319720312245296956	5.6657338462327002659	.00010393999999999999756
ENSDART00000004209	807.655	646.792	420.962	698.404	702.715	1236.69	1034.48	553.54	581.783	157.324	443.074	781.649	22	cos_per_28_ph_22	.86278316026470003308	5.3965574152395401342	.000151449999999999995
ENSDART00000004255	181.859	248.573	262.643	243.948	160.892	173.038	257.246	338.372	356.435	159.41	104.242	228.024	8	cos_per_21_ph_8	.88792649455588901208	6.104259620076789794	.000057522999999999997961
ENSDART00000004277	1589.01	1669.15	1001.18	1840.16	2995.69	1770.66	1701.58	1380.86	1221.2	665.805	2520.82	1672.25	17	ct17-spike	.83919816508100697483	4.8798307907884401757	.00032106000000000001942
ENSDART00000004392	389.87	379.769	433.883	245.435	244.51	155.616	220.817	301.432	466.665	478.922	135.839	173.551	5	cos_per_27_ph_5	.86106715785050602641	5.3549268466101995756	.00016066999999999999143
ENSDART00000004398	1741.57	1429.01	2814.11	1567.1	1522.42	1532.65	1291.46	1629.56	2259.74	1201.18	945.111	1310.29	8	ct08-spike	.87373844657707300243	5.6805632259228300285	.00010184000000000000073
ENSDART00000004423	897.9	1177.39	1335.06	737.601	594.362	568.114	907.607	937.911	1210.14	731.114	295.118	338.65	6	ct06-box1	.92131983804456296649	7.4933836173000196723	.000010393000000000000274
ENSDART00000004462	168.71	164.749	50.0889	96.9992	65.2277	124.953	187.626	104.937	40.9788	72.9207	50.8839	177.234	0	ct00-box1	.88088188270264200508	5.8850208512725403764	.000077069000000000003605
ENSDART00000004539	1921.11	1384.53	2543.12	2153.43	2082.5	1277.66	1658	1724.26	2880.29	2775.24	1171.55	1210.53	10	ct10-spike	.84583511913836195717	5.0141409146676902964	.00026312999999999998283
ENSDART00000004717	1901.82	3759.85	2376.22	2475.26	933.416	1883.87	4481.82	3977.5	2492.51	1539.05	2001.34	4201.23	6	cos_per_20_ph_6	.88217312616709397943	5.9238201126730096746	.000073145999999999993901
ENSDART00000004921	129.959	432.024	381.502	338.844	197.432	226.459	320.25	350.899	295.509	244.602	224.055	452.455	7	cos_per_20_ph_7	.82985704017360595319	4.7031378728083899077	.00041878999999999999343
ENSDART00000004984	841.068	439.721	36.9305	392.821	228.969	257.74	831.615	366.101	126.861	17.205	79.6231	81.5331	1	ct01-spike	.92953724213689303824	7.9718734036289902178	.0000060718000000000000405
ENSDART00000005162	10.9634	10.5514	14.4892	14.641	18.4744	27.3047	14.1319	17.929	12.9918	14.721	9.2932	71.5571	20	ct20-spike	.81612651916686196341	4.4660634739982398855	.00060238000000000001613
ENSDART00000005263	1299.95	1786.99	1838.93	1541.58	1109.95	1490.13	1482.83	1902.19	1789.97	552.201	1249.61	2000.76	7	cos_per_20_ph_7	.83257147632014905092	4.7530933385370301991	.00038830000000000000583
ENSDART00000005300	714.261	921.691	633.763	718.396	458.92	428.984	717.485	629.088	613.644	783.846	306.843	219.761	6	ct06-box2	.87396795523825299146	5.6868783456279299315	.0001009599999999999956
ENSDART00000005345	3545.1	3689.01	4329.29	3597.8	1182.67	3016.04	3667.04	3224.6	4416.92	2333.6	1065.41	3897.74	3	ct03-box2	.90214646925923203113	6.612517368997480105	.000029916999999999998336
ENSDART00000005491	4551.95	8028.49	6039.26	5780.17	2715.8	4421.01	5049.03	5573.13	4147.05	2327.05	3566.03	6661.04	6	cos_per_20_ph_6	.84006857091447695307	4.8970081211433802437	.00031294999999999999034
ENSDART00000005573	274.938	543.068	1102.34	388.011	477.03	485.181	449.711	477.273	703.107	324.571	240.777	201.165	7	ct07-spike	.86041460356831400702	5.3392826345868602544	.00016428999999999998726
ENSDART00000005590	891.808	618.056	1520.78	935.372	796.828	714.437	779.052	934.569	1498.54	1407.85	577.229	695.681	9	ct09-spike	.88812597575174301312	6.110749186857630022	.000057031999999999998766
ENSDART00000005714	373.454	582.93	205.299	408.992	187.774	255.877	394.182	533.354	187.199	23.2432	91.7716	104.895	3	ct03-spike	.83188242719144001036	4.7403083888695700665	.00039586999999999998925
ENSDART00000005829	1116.89	999.023	931.989	794.908	193.457	350.258	650.87	845.75	665.038	555.7	169.82	780.965	5	ct05-box2	.81077027525206102343	4.3799732777272097906	.00068873000000000002795
ENSDART00000005847	163.73	147.395	212.424	203.338	476.908	279.721	225.253	315.99	234.513	355.797	460.184	135.453	15	ct15-spike	.84653508278628497585	5.0287682861327098749	.00025753000000000000934
ENSDART00000005869	1175.07	1057.12	1380.5	799.275	752.697	602.754	1128.55	1079.09	1331.14	948.093	700.156	971.599	5	ct05-box1	.85897174607483195441	5.3050492480002997553	.00017252000000000000841
ENSDART00000006124	1916.16	2186.57	2293.95	1959.89	1645.06	2047.9	1897.13	2524.65	3349.19	1473.92	1703.84	1678.88	7	ct07-spike	.81068051276792696402	4.3785585350265296967	.00069024999999999999984
ENSDART00000006147	62.1395	52.4821	112.034	228.894	109.642	230.556	40.5223	47.0252	71.8135	127.265	152.771	179.452	16	ct16-box1	.82356168513264205178	4.5913399903294402904	.00049660000000000003618
ENSDART00000006211	241.043	185.324	51.265	146.728	185.109	183.28	215.843	227.403	49.4278	95.7808	132.578	130.96	21	ct21-box2	.83867439268572596678	4.8695554404146603744	.00032601999999999999903
ENSDART00000006338	197.217	318.65	273.712	224.491	175.702	185.512	238.486	263.374	255.056	122.787	112.029	123.352	6	cos_per_23_ph_6	.87349480837984194714	5.6738768682895202033	.00010278000000000000189
ENSDART00000006414	366.089	615.893	793.652	390.512	323.457	324.765	565.37	429.843	745.122	428.468	245.784	121.855	7	ct07-rigid	.86518696511544102012	5.456106502549819659	.00013922000000000001214
ENSDART00000006417	14231	12450.2	13914.7	15421.3	8946.56	12990.5	15188.1	16246.2	13950.1	11793.1	9304.72	16223.6	4	ct04-box2	.81991933455631205163	4.5290958809076897751	.00054646000000000002298
ENSDART00000006513	12873.8	12292.9	7550.8	8752.55	4864.07	8277.46	9542.74	9913.61	8299.86	4888.52	4954.58	10018.1	3	cos_per_23_ph_3	.84375341489961697139	4.9711727761906496781	.00028035000000000001108
ENSDART00000006619	221.601	573.697	464.599	385.907	292.14	227.593	245.051	378.241	588.273	382.949	136.875	131.135	7	ct07-sine	.9002722080536780247	6.5397001082708197117	.000032787999999999998461
ENSDART00000006648	244.945	299.626	407.963	260.938	284.187	268.382	278.38	231.229	384.411	167.618	226.202	160.901	7	ct07-spike	.81704792561631900405	4.4812138707420103856	.00058839999999999999074
ENSDART00000006698	237.552	159.887	111.796	57.5459	183.213	174.25	233.62	125.023	77.783	112.789	192.915	128.292	21	cos_per_20_ph_21	.82229718651105498939	4.5695354413965798557	.00051349999999999995908
ENSDART00000006783	849.985	1109.39	1658.07	1284.17	788.603	900.464	758.198	924.336	1346.15	1585.01	763.105	306.549	9	cos_per_24_ph_9	.87216209756903595451	5.637618281718790314	.00010806000000000000555
ENSDART00000006787	1091.25	192.208	275.515	861.387	128.238	637.626	935.276	159.663	142.183	378.313	291.899	585.278	23	ct23-spike	.81398128337597897008	4.4311831034160995557	.00063590000000000000691
ENSDART00000006795	30.5634	20.6896	47.0659	66.1447	24.3794	44.5798	30.4363	28.783	38.4217	77.9781	46.4453	38.186	11	ct11-spike	.8778557371772619522	5.796362028249729903	.000086908000000000002068
ENSDART00000006922	139.916	56.8814	45.7957	19.7925	1597.75	30.684	36.8173	60.9512	102.41	109.326	1074.51	76.0426	16	ct16-spike	.97308181335204901874	13.352233204241899855	.000000053193999999999999736
ENSDART00000006923	321.405	496.12	946.458	456.959	305.084	433.794	410.318	455.893	798.253	410.605	274.708	320.046	7	ct07-spike	.94276868772821997844	8.9408282061868398216	.0000021954000000000001901
ENSDART00000007022	454.726	345.146	804.346	312.342	514.216	294.418	362.975	421.347	651.927	528.604	360.417	478.614	8	ct08-spike	.83403766425991199274	4.7805379377007604091	.00037256000000000002439
ENSDART00000007122	29.4739	29.973	59.6984	40.3115	28.6518	20.0094	31.7659	49.4737	54.4167	57.9252	17.5003	24.4129	9	cos_per_23_ph_9	.87421779258705101245	5.6937711424819203998	.00010000999999999999961
ENSDART00000007197	19.778	39.0641	10.0806	18.7836	144.804	17.4054	13.9909	14.9627	12.3912	23.9891	58.7785	38.9208	16	ct16-spike	.83705815033912200906	4.8381335979580901707	.00034170000000000001154
ENSDART00000007204	582.699	700.793	684.365	547.465	391.517	431.77	655.192	500.684	723.835	303.339	242.669	167.796	5	ct05-box1	.83892399234979297962	4.8744463751472100199	.00032364999999999997937
ENSDART00000007379	1550.41	1145.23	450.681	682.249	794.358	1256.97	955.529	604.276	627.506	205.661	602.955	984.106	23	cos_per_24_ph_23	.81475462932595799082	4.4436945461169301552	.0006236500000000000073
ENSDART00000007382	1167.64	1078.31	3430.16	1944.61	743.628	891.996	1481.56	846.302	1830.97	3016.19	807.859	751.563	10	ct10-spike	.86106282793416599741	5.3548227061089104239	.00016069000000000000818
ENSDART00000007392	164.365	166.855	247.299	193.277	131.424	160.819	189.826	230.628	265.886	159.296	105.213	123.549	8	cos_per_22_ph_8	.88089775849612494962	5.8854942936075396176	.000077020000000000004583
ENSDART00000007398	2270.83	2555.52	3802.35	1791.34	595.887	1138.84	2477.81	2212.9	3576.48	2172.06	858.533	877.635	6	ct06-box1	.89569197261442301539	6.3696552938705703895	.000040717000000000003353
ENSDART00000007405	416.698	653.313	498.754	409.429	244.511	272.207	377.133	369.532	444.218	311.423	162.798	313.085	5	ct05-rigid	.83914189168260799878	4.8787246259448195929	.00032159000000000001604
ENSDART00000007412	3491.32	4155.4	5432.07	3779.15	3412.68	2909.88	3185.45	4132.94	5014.05	3471.14	3341.35	3654.44	7	ct07-spike	.94729450486719701807	9.3506381292980691455	.0000014653999999999999796
ENSDART00000007497	60.3055	87.1614	180.411	88.1116	54.1929	87.8681	80.0575	120.713	109.7	62.1134	47.9926	69.5186	8	cos_per_21_ph_8	.82240799570242295591	4.5714377846395901628	.00051199999999999997683
ENSDART00000007600	37.6795	60.1873	79.4986	30.3461	28.1465	25.1692	31.378	29.2944	61.5473	58.8117	37.1508	28.1854	6	cos_per_28_ph_6	.84007252840316304354	4.8970865137857302329	.00031291000000000001105
ENSDART00000007624	100.922	52.8888	70.4472	33.927	439.873	309.235	151.538	30.347	43.9788	63.5617	228.159	116.008	17	ct17-spike	.82370403976167505533	4.5938079554599200449	.00049472999999999997447
ENSDART00000007636	41.5134	36.7725	54.4614	30.8622	258.052	167.305	67.1388	31.405	38.2694	271.33	446.613	65.992	15	ct15-spike	.83137444242394797911	4.7309286217653996331	.00040151999999999999106
ENSDART00000007726	251.311	394.614	590.132	309.961	353.681	306.384	263.15	478.385	767.451	395.271	276.476	285.331	7	ct07-spike	.93003684025225097365	8.0035496776232299965	.0000058645999999999997204
ENSDART00000007767	7321.17	5537.94	5731.21	4651.43	4115.65	4161.74	5881.38	6044.1	4508.13	1324.2	2595.62	3515.26	3	ct03-box1	.81898374010655294875	4.5133818418145903451	.00055986000000000002343
ENSDART00000007778	2123.17	2032.41	496.074	1361.75	107.008	1017.32	2454.87	1218.84	400.463	128.721	324.077	121.66	2	ct02-spike	.84355773256302002405	4.9671741718685495925	.00028201000000000001891
ENSDART00000007797	613.053	855.433	1187.88	860.482	877.28	686.795	1069.71	1214.31	1270.9	487.479	538.916	1041.01	8	cos_per_20_ph_8	.85581553220007000604	5.2318287762103201644	.00019164000000000000153
ENSDART00000007842	3543.32	4674.07	5123.85	3878.86	2216.72	3362.16	4637.12	4698.87	4809.26	4292.73	2560.39	3325.88	6	cos_per_23_ph_6	.90774646133365999301	6.8424671223685695765	.000022498999999999999224
ENSDART00000008062	410.955	665.095	684.691	467.139	274.098	301.153	326.312	476.47	545.858	362.897	201.67	361.904	7	cos_per_23_ph_7	.88115835649256901707	5.8932784514804703591	.000076216000000000003471
ENSDART00000008243	6453.32	7019.33	5326.62	3629.66	1555.16	3945.35	6587.69	7088.78	6026.98	3033.64	2050.44	711.971	2	cos_per_26_ph_2	.94803821613095695664	9.4229108458176504826	.0000013665999999999999684
ENSDART00000008248	1147.1	650.992	396.85	601.752	259.728	514.437	945.631	508.407	433.432	299.336	283.395	375.83	1	ct01-spike	.91576413841355397416	7.2088186724506195802	.000014478999999999999778
ENSDART00000008302	907.208	1260.31	1565.66	1058.12	663.016	1066.05	1084.39	1353.82	1594.67	592.021	773.1	1418.5	7	cos_per_21_ph_7	.83059078238273897909	4.7165338227679995953	.00041037000000000001644
ENSDART00000008365	2280.49	1710.19	3609.34	3396.98	1767.43	1926.77	2088.24	1166.22	2911.16	3885.35	2054.06	1212.52	10	ct10-spike	.90496236124213802476	6.7257310742666200909	.000025979999999999998591
ENSDART00000008416	378.493	380.151	667.517	422.702	444.069	308.536	384.798	457.933	621.572	314.018	173.212	257.99	7	ct07-spike	.84377193662030403054	4.9715516081534101289	.00028018999999999998551
ENSDART00000008456	792.61	429.339	237.976	187.561	5822.2	369.31	422.375	205.925	294.09	256.531	1537.08	192.233	16	ct16-spike	.81383086011703398288	4.4287576410757898415	.00063829999999999995682
ENSDART00000008595	1090.77	836.177	1427.63	865.125	893.473	816.636	842.578	865.726	1243.43	556.575	850.07	799.697	8	ct08-spike	.84219044164556899901	4.9394249785194803692	.00029384000000000001914
ENSDART00000008603	238.898	148.528	128.016	200.664	169.991	257.586	256.517	172.425	163.595	108.247	136.646	164.653	23	cos_per_28_ph_23	.8389893487930589755	4.8757287561152296007	.00032302999999999997514
ENSDART00000008752	5659.75	8505.96	3630.54	611.312	143.964	1235.75	5675.31	5594.58	2876.66	525.831	129.319	610.835	3	ct03-sine	.94403282188564896504	9.0504170524984708379	.0000019676000000000000164
ENSDART00000008854	4039.62	4839.56	6232.35	3624.52	4329.52	4088.57	3811.86	5010.03	5852.29	2308.95	3298.93	3314.6	7	ct07-spike	.86798727639804396095	5.5273696113097798843	.00012596999999999998823
ENSDART00000008871	558.427	795.059	172.61	296.588	57.4736	491.341	577.236	535.013	361.958	25.8797	281.14	697.431	3	cos_per_22_ph_3	.87462376041284395356	5.7050124012960496955	.000098473000000000003996
ENSDART00000008980	860.209	1235.98	1126.85	1088.76	842.747	900.208	859.972	1161.34	1247.72	673.196	698.163	856.843	6	ct06-spike	.84799758186970397578	5.059628917440540441	.00024612000000000000847
ENSDART00000009076	91.203	101.292	43.7609	54.7602	14.9723	42.843	95.5576	84.7428	57.9098	27.7562	26.6633	25.5157	2	ct02-spike	.90886778076412300109	6.8909137013279799788	.00002120500000000000111
ENSDART00000009196	505.243	797.541	1042.41	596.842	389.299	509.452	639.556	659.048	896.275	827.066	283.197	119.424	7	ct07-rigid	.88324074742084002221	5.9563542921258596508	.00007002200000000000145
ENSDART00000009217	388.844	855.529	1144.64	797.932	371.657	335.996	471.789	690.663	1102.42	1363.14	344.409	167.772	8	cos_per_25_ph_8	.91717184341534296887	7.2783208176157998537	.000013340999999999999831
ENSDART00000009223	421.779	561.863	386.851	247.618	166.78	282.928	251.459	402.462	261.886	71.4135	136.994	127.622	4	cos_per_24_ph_4	.81796086111192101153	4.4963268393091704311	.00057481000000000003446
ENSDART00000009256	255.853	341.654	435.651	363.481	222.648	241.53	282.31	319.66	293.071	150.924	192.925	300.715	8	cos_per_20_ph_8	.8495767609531860165	5.0934139835246199368	.00023425999999999999666
ENSDART00000009277	139.774	22.1561	54.0717	38.5046	264.583	154.19	54.5268	25.7026	59.7602	135.211	168.936	28.0097	17	cos_per_21_ph_17	.85831791023373904537	5.2896957306009699806	.00017635000000000000393
ENSDART00000009385	557.283	639.008	1059.41	997.019	591.714	586.332	584.8	861.471	1027.88	964.078	479.683	623.991	10	cos_per_22_ph_10	.92615601386284096552	7.7657043886993299964	.000007631000000000000291
ENSDART00000009411	792.094	1065.87	1615.66	887.956	771.721	658.874	822.56	921.807	1511.57	1754.53	589.42	475.484	8	cos_per_25_ph_8	.84721155655520397065	5.0429922355875600459	.00025220000000000000447
ENSDART00000009473	344.552	378.606	423.157	311.591	205.086	187.689	251.084	316.869	413.591	155.893	106.826	274.795	6	cos_per_23_ph_6	.8316542081009330456	4.7360896311415201509	.00039839999999999998028
ENSDART00000009557	6364.54	2498.25	2215.35	2701.92	1292.04	4609.64	5153.48	2254.74	1927.02	438.591	1301.31	913.13	23	ct23-spike	.82109878201399100206	4.5490635853633198948	.00052990999999999997307
ENSDART00000009613	636.812	1042.91	712.305	787.999	341.443	517.551	419.407	2114.47	869.994	65.1858	445.479	490.425	5	ct05-spike	.8302453995595959757	4.7102183443033798227	.00041430999999999998211
ENSDART00000009712	345.675	261.663	815.384	356.541	436.754	433.333	363.571	536.134	790.954	298.833	268.193	211.66	8	ct08-spike	.89359233717951003229	6.295203011320429809	.000044818999999999998977
ENSDART00000009859	1167.86	1283.96	1546.07	1301.33	1181.01	897.017	1345.35	1406.87	1307.06	741.595	601.398	1208.34	7	cos_per_21_ph_7	.83085909001595903423	4.7214520552810999021	.00040732000000000002362
ENSDART00000009888	67.6372	43.1685	74.9575	52.2147	213.661	51.3048	37.028	29.5625	76.2711	91.5974	125.137	61.5493	16	ct16-spike	.85837818616290395557	5.2911070311055397042	.00017599999999999999542
ENSDART00000009902	350.054	705.212	207.623	300.073	199.109	319.742	454.486	500.752	161.169	167.046	144.208	121.967	3	ct03-spike	.89260507796090604593	6.2609102632151998336	.000046857000000000002165
ENSDART00000009932	200.346	280.682	300.606	203.807	173.405	188.948	238.603	242.426	302.828	98.6905	151.592	187.986	6	cos_per_22_ph_6	.83892647911970996688	4.8744951558709201933	.00032362999999999998973
ENSDART00000009952	3435.26	3154.11	3860.89	2627.59	1171.01	2392.09	2721.41	4488.06	3843.77	1214.7	1415.33	3997.66	6	cos_per_21_ph_6	.8364219310299180199	4.8258813237415196795	.00034802999999999998651
ENSDART00000009973	1554.74	2188.07	942.193	1071.88	719.626	1068.29	1417.81	1780.42	963.918	48.1773	490.67	986.532	3	cos_per_23_ph_3	.86368087403593396534	5.4186254418607999739	.00014678999999999999557
ENSDART00000010041	484.769	745.902	999.595	1023.43	443.976	356.692	375.092	776.977	971.577	446.764	412.39	318.645	9	cos_per_22_ph_9	.91070302953785597921	6.9720713465927204311	.000019215000000000001529
ENSDART00000010068	2448.04	2357.09	3357.11	3322.72	907.25	771.512	2501.34	2717.1	3975.32	1523.08	471.052	1254.28	7	cos_per_23_ph_7	.87055953586914502917	5.5947112705891202111	.00011468000000000000654
ENSDART00000010081	9455.3	13107.1	15155.8	10290.5	9383.1	9157.66	10682.4	10361.3	14237.1	11752.8	6018.79	9574.41	7	cos_per_23_ph_7	.82464357953550004865	4.610164525130699964	.00048250000000000001872
ENSDART00000010104	1097.69	1387.13	1646.75	772.945	897.377	675.348	803.496	996.268	1615.88	1049.95	888.557	833.734	7	ct07-spike	.90037494189008204781	6.5436409006980396086	.000032625000000000000191
ENSDART00000010124	713.68	1089.42	476.5	645.076	5369.54	1064.57	2252.7	615.775	469.11	183.56	2960.23	410.156	16	ct16-spike	.87195427266492797624	5.6320116764703298529	.00010890000000000000428
ENSDART00000010143	823.629	752.057	1024.67	797.107	607.308	577.27	842.894	921.54	1002.05	938.301	574.623	89.3658	7	ct07-box2	.84701115715359598379	5.0387694982455704107	.00025377000000000000468
ENSDART00000010177	300.407	298.04	621.555	267.179	244.283	213.73	261.17	218.101	408.459	281.07	72.1835	271.193	8	ct08-spike	.8141526392655480393	4.433949307803890072	.00063316999999999995681
ENSDART00000010189	163.918	214.035	50.6875	199.802	240.67	236.223	213.828	252.753	82.9045	120.64	285.888	309.252	21	ct21-box2	.85417515908956498372	5.194644150510089986	.00020221000000000000367
ENSDART00000010254	1450.72	1591	2074.86	1301	372.914	603.74	1021.92	1083.44	1148.9	966.389	233.628	478.167	6	ct06-box1	.82813927020452804406	4.6720815487000901811	.00043900999999999998618
ENSDART00000010256	2728.82	5494.62	5979.14	4062.11	4254.24	3264.58	4400.77	4048	7412.69	4631.39	3179.5	4135.15	7	ct07-spike	.84546517427856104909	5.0064468833988398089	.00026613000000000000154
ENSDART00000010257	680.802	515.181	377.082	406.177	189.822	409.473	692.838	445.804	402.857	83.0245	226.041	340.235	1	ct01-rigid	.85014558996633804444	5.1057034888364398739	.00023008999999999998746
ENSDART00000010258	1124.72	1344.19	1098.17	681.184	877.822	781.166	1239.14	1337.27	1623.98	434.542	859.815	792.643	4	ct04-box1	.86327557072731198051	5.4086371479446899713	.00014887999999999999758
ENSDART00000010311	4701.74	3248.04	3928.49	2897.72	2038.51	2011.17	2775.1	3363.84	3733.54	1722.69	1171.34	1375.9	4	ct04-box1	.83376823788365994616	4.7754699812770500245	.00037542000000000000717
ENSDART00000010407	6324.19	4387.63	1617.29	2600.33	2455.34	7465.47	6685.47	3999.12	1439.59	599.584	2431.58	6496.41	23	ct23-box1	.95549002046739894833	10.24164354107310082	.00000063827999999999996887
ENSDART00000010495	790.59	1098.72	2323.58	1192.09	625.043	671.252	546.357	1182.54	1971.59	2312.18	601.276	1239.38	10	ct10-spike	.83549807840428702566	4.8082052750261299323	.00035738000000000002404
ENSDART00000010512	231.088	446.768	754.66	370.89	219.562	213.872	289.705	418.229	591.188	222.649	117.646	198.418	7	ct07-spike	.92409089064938498836	7.6463636657664100227	.000008728499999999999524
ENSDART00000010521	341.046	336.116	466.928	171.129	258.485	221.108	289.713	148.238	604.508	287.357	235.754	238.129	8	ct08-spike	.86264356691420696066	5.3931438881557900444	.00015217999999999999648
ENSDART00000010699	838.594	925.214	1541.72	843.652	825.589	704.743	925.434	1035.24	1307.84	765.145	531.346	814.624	7	ct07-spike	.91328332266511302873	7.090299323101960205	.000016668999999999999139
ENSDART00000010706	197.641	245.47	389.739	117.128	122.664	129.538	181.939	159.142	334.852	113.171	60.6157	107.472	7	ct07-spike	.91002825992636005026	6.9419570546852602533	.000019928999999999998419
ENSDART00000010764	931.11	1962.13	270.229	1048.07	892.049	960.124	1303.9	1554.68	314.915	478.064	852.25	204.451	3	ct03-spike	.82457195007908101747	4.6089133392256300681	.00048341999999999997603
ENSDART00000010792	2946.42	2916.93	2440.8	2388.36	1532.14	2204.08	3039.31	2864.04	2314.8	913.747	1372.17	3164.82	4	cos_per_22_ph_4	.87467241010375895716	5.7063629305866498953	.000098290999999999997946
ENSDART00000010862	1757.11	1657.33	2006.67	1163.49	908.676	833.919	1350.56	1272.71	1831.16	1740.97	510.283	1010.75	5	cos_per_26_ph_5	.82739069991566904783	4.6586795048785303308	.00044806000000000001642
ENSDART00000010942	1553.48	2581.46	2399.97	2383.71	1607.68	1819.41	2694.59	2637.97	2782.4	1082.97	1410.51	3330.17	7	cos_per_20_ph_7	.83508602040759305485	4.8003650395037098519	.000361619999999999997
ENSDART00000010944	818.525	959.394	1202.25	803.146	812.279	712.583	642.694	734.04	1016.26	751.885	659.171	450.273	8	ct08-rigid	.81447831498028799846	4.4392161801581702107	.00062799999999999997751
ENSDART00000010982	113.006	14.9091	52.5888	44.9586	21.116	109.815	100.563	37.5896	42.9834	56.925	34.9472	142.76	22	ct22-spike	.93199278152584397183	8.1307815453121303761	.0000051065000000000001517
ENSDART00000010992	543.635	612.44	1197.08	707.506	461.824	676.31	497.225	390.892	926.016	1071.26	365.535	416.125	10	ct10-spike	.85989559448510799466	5.3269122806704700679	.00016721999999999998801
ENSDART00000011082	272.408	519.493	295.402	44.9967	27.4888	88.0712	307.423	580.511	463.341	87.226	62.8121	58.9576	4	cos_per_24_ph_4	.94105920276914301059	8.7981133391935895105	.0000025359999999999999445
ENSDART00000011163	4355.75	5355.45	5060.79	3661.32	2108.24	2969.05	3983.33	4635.02	5912.34	2565.98	2900.88	2982.43	5	ct05-box1	.92111327251847197051	7.4822908128172995745	.000010526000000000000525
ENSDART00000011192	264.235	314.341	370.967	331.289	213.726	203.292	282.702	268.756	359.309	159.24	130.245	205.732	7	cos_per_22_ph_7	.82964261855190402084	4.6992380060790397422	.00042127000000000001034
ENSDART00000011201	851.336	1413.93	1553.12	960.414	1080.44	636.656	1021.98	1149.73	1302.97	1378.75	616.648	636.036	7	ct07-rigid	.86675125597495594754	5.4956579131698797269	.00013169000000000000801
ENSDART00000011398	4086.78	2750.12	199.053	2272.35	467.116	1417.05	4718.29	2799.62	308.498	168.09	237.529	891.51	1	ct01-spike	.90299418484873295032	6.6461071412471799391	.000028685999999999999449
ENSDART00000011534	1588.2	1386.91	1279.3	1170.91	627.903	1114.73	1177.82	1223.14	1057.04	761.089	624.403	920.634	3	ct03-rigid	.82256923190826602976	4.5742087178715200579	.00050982000000000002142
ENSDART00000011705	129.168	222.489	84.1424	104.397	73.7708	58.7235	57.8397	212.032	151.56	81.1467	45.7729	66.262	5	ct05-spike	.89703298652934104762	6.4183280997666196654	.000038254999999999998804
ENSDART00000011724	178.856	383.093	92.3273	162.864	117.463	121.963	232.88	289.016	164.624	57.6994	149.952	147.992	3	ct03-spike	.90568843690473099795	6.7557007250790501729	.000025034000000000001211
ENSDART00000011822	45.2786	38.2604	38.3321	31.4846	1930.76	41.419	119.88	86.724	163.546	96.4743	1581.7	95.6594	16	ct16-spike	.99177515630554602399	24.50356324497920113	1.4618000000000000599e-10
ENSDART00000011865	5717.22	4845.22	5912.82	4308.09	1121.9	3006.88	6505.76	4919.47	6108.27	2716.35	820.132	2363.39	4	ct04-sine	.87548834541587194913	5.7291234714707304221	.000095267999999999996566
ENSDART00000011943	11363.8	10834	10751.3	6838.83	2433.36	8746.64	11342.4	11179.6	8545.87	3357.88	3205.01	4107.62	3	ct03-sine	.91094462006813103905	6.9829325049274002524	.00001896499999999999884
ENSDART00000012143	1074.89	159.163	292.034	602.754	474.66	970.652	744.216	648.277	697.413	279.796	312.24	983.101	22	ct22-spike	.81953187335040600381	4.5225748152558500337	.00055197999999999998368
ENSDART00000012167	1596.28	2268.03	2860.05	1149.62	948.751	671.52	1028.35	1527.48	2414.23	2512.46	480.966	1272.3	6	cos_per_26_ph_6	.8407733223952349455	4.9110103642913101041	.00030650000000000002329
ENSDART00000012212	428.677	550.609	1244.5	442.067	378.021	367.687	379.235	386.713	875.332	600.998	298.295	134.557	9	ct09-spike	.89617050044820001364	6.3869213871957501993	.000039823999999999996826
ENSDART00000012224	379.805	410.484	812.49	402.934	296.858	409.265	418.115	462.117	650.039	492.335	293.79	390.246	9	ct09-spike	.89766686882187396446	6.4416493057586601267	.000037132000000000002949
ENSDART00000012256	39.8702	13.2845	36.4347	25.6107	175.741	41.5679	25.4867	25.196	83.0514	47.6381	91.6712	57.2053	16	ct16-spike	.82179560930899897553	4.5609445358011102556	.00052032000000000000559
ENSDART00000012300	21309.3	18011.9	3418.7	11414.6	2001.81	15020.6	18661.4	16854.7	4620.76	2826.08	5463.49	4721.77	2	ct02-spike	.85220124890703197185	5.1506578084362697467	.00021551999999999999652
ENSDART00000012413	209.816	197.803	94.0129	186.714	479.738	330.914	264.775	164.65	128.383	70.0808	471.954	125.313	17	ct17-spike	.86200913395441502995	5.3776903781346803157	.00015555000000000001334
ENSDART00000012476	1066.38	1120.01	1265.22	567.172	520.169	447.933	865.262	979.677	1159.75	1014.34	328.271	624.45	5	cos_per_25_ph_5	.90061037899738805024	6.5526939170035296556	.00003225500000000000204
ENSDART00000012483	28.0517	38.5519	54.1819	24.357	41.6411	209.357	43.2371	31.946	28.8563	41.0674	138.493	130.899	19	ct19-spike	.88090081574201095638	5.8855854759017498523	.000077009999999999996208
ENSDART00000012540	34.2769	42.2632	43.27	50.871	206.644	76.767	60.5335	60.7999	55.1772	48.1612	111.966	165.934	18	ct18-spike	.82290750654380795392	4.5800332499468101588	.00050529000000000003599
ENSDART00000012581	1404.03	1860.35	790.407	951.727	623.321	1025.56	1234.58	1398.92	809.906	264.171	491.247	773.377	2	ct02-sine	.85372848912876797556	5.1846188949422096215	.00020515999999999999406
ENSDART00000012670	2935.85	3019.54	3708.71	2646.19	2468.74	2689.32	3182.95	2617.13	3734.71	2299.51	2678.45	3034.81	8	ct08-spike	.830971209559816959	4.7235104183255200994	.00040606000000000002552
ENSDART00000012673	22.437	45.8239	29.4187	48.9895	94.3463	25.0309	38.9747	25.8066	19.9315	32.1413	51.9204	19.086	15	ct15-spike	.81047120387249604878	4.3752631233275902645	.00069382000000000004867
ENSDART00000012842	307.781	202.674	61.2858	99.6494	154.612	168.655	265.492	149.561	203.961	61.4838	78.6566	122.544	1	ct01-spike	.82292849716174198971	4.5803951702135403679	.00050500999999999996413
ENSDART00000012974	648.798	1075.6	1409.9	1122.01	781.768	968.53	747.492	1241.37	1389.77	621.778	680.933	664.542	9	cos_per_21_ph_9	.84642551585547598503	5.0264725797712701549	.00025839999999999999254
ENSDART00000013360	3505.82	3268.27	4980.34	4261.3	1017.48	884.952	1731.43	3163.76	4170.13	4572.95	1403.39	310.534	7	cos_per_26_ph_7	.90942715066168700044	6.9154007666683003919	.000020582000000000000468
ENSDART00000013432	734.025	923.547	1627.99	710.374	501.022	565.455	627.353	905.869	1166.87	973.179	271.734	686.236	7	ct07-spike	.84170274201904504707	4.929606783382859625	.00029815000000000001007
ENSDART00000013434	163.633	302.225	209.073	85.6157	1336.9	579.097	243.713	250.322	159.804	105.02	760.431	46.7321	16	ct16-spike	.87033611277275302331	5.5887882561845501073	.00011563000000000000253
ENSDART00000013440	355.392	319.129	761.14	412.715	390.741	393.873	446.284	545.75	907.05	731.053	275.82	499.618	9	ct09-spike	.84836539444085801165	5.0674546123259096575	.00024331999999999999462
ENSDART00000013453	1292.04	1607.07	2247.87	1742.62	523.357	1172.21	1393.28	1746.4	2110.2	897.439	732.987	1756.78	7	cos_per_21_ph_7	.86056600430584295758	5.3429032330155896702	.00016344999999999998853
ENSDART00000013485	713.355	628.571	121.809	250.968	231.095	247.279	1135.46	219.815	81.9972	86.3831	115.943	143.085	1	ct01-spike	.90589659946307199423	6.7643536196065099375	.000024768000000000000709
ENSDART00000013538	2030.99	2497.24	2797.55	2018.08	1858.57	1558.72	1986.86	2298.41	2557.64	2325.52	1040.84	800.902	7	ct07-rigid	.89167095407381502525	6.2288713768473895627	.000048850999999999996965
ENSDART00000013588	70.5867	50.7363	55.2143	53.7599	106.706	32.5607	26.0214	46.2466	55.2986	83.2699	107.785	58.8867	15	ct15-spike	.86174873620969805188	5.371376148026709707	.00015695999999999998798
ENSDART00000013641	35.8117	43.2213	73.6926	44.2434	35.7582	36.8955	47.7852	37.1847	77.1605	90.0896	38.7064	48.3574	10	ct10-spike	.81101078607185095315	4.3837684064011996909	.00068466000000000002117
ENSDART00000013787	3279.36	3303.61	4406.35	2325.88	2500	2244.95	2713.89	3270.49	3932.19	2991.01	1702.22	952.092	7	ct07-rigid	.86551624316791297975	5.4643786891808296957	.00013761000000000000554
ENSDART00000013989	164.979	49.8672	72.7575	145.024	300.256	190.769	146.308	137.949	199.351	125.715	515.07	273.829	17	ct17-spike	.86404338258918300664	5.4275941437428496528	.00014494000000000000481
ENSDART00000014007	10067.6	14676.1	10779.9	8605.89	5050.99	8975.49	9656.58	10054.9	9069.28	6389.77	4625.1	5337.87	4	ct04-rigid	.87433878153885502549	5.6971160123546695786	.000099548000000000003021
ENSDART00000014013	4563.24	2550.21	3050.75	1823.94	662.579	1045.67	3075.78	4028.7	3333.61	1482.34	221.934	2259.74	3	cos_per_25_ph_3	.87035004063660303952	5.5891570715712504125	.00011557000000000000649
ENSDART00000014047	10.999	29.9876	19.7964	30.0068	24.519	54.6823	25.4321	11.6759	12.6962	36.6522	15.7416	78.9833	20	ct20-spike	.87732061357860602335	5.7810045561496803401	.000088745999999999993619
ENSDART00000014207	724.702	874.421	50.2432	33.1732	2959.21	98.8284	682.943	198.172	417.393	279.166	1804.35	145.541	16	ct16-spike	.90493231311940502959	6.7244978375160098238	.000026020000000000001597
ENSDART00000014232	417.088	392.171	566.042	490.538	162.952	269.31	750.281	682.478	697.717	408.593	164.468	236.571	6	ct06-box2	.81813167825176003056	4.4991659521606903738	.00057229000000000003825
ENSDART00000014296	4865.48	6584.67	6513.6	5381.05	3637.67	5465.19	5652.35	6242.34	6583.08	3141.69	4199.41	5872.91	6	cos_per_21_ph_6	.870308354975013021	5.5880533835523298336	.0001157499999999999946
ENSDART00000014660	880.574	1271.09	1663.29	1018.82	603.905	705.318	1038.76	1646	1926.42	752.111	203.021	759.736	7	cos_per_22_ph_7	.93093154799826804968	8.0611025825759092811	.0000055075000000000002087
ENSDART00000014669	1386.28	3625.21	3871.06	3903.88	1316.38	2203.09	2301.52	2544.85	3510.14	1536.72	974.139	1863.28	8	cos_per_21_ph_8	.82742180666140796585	4.6592348517585602252	.00044767999999999999634
ENSDART00000014714	256.045	414.526	501.493	412.532	179.533	380.105	256.145	341.676	552.188	304.668	231.683	290.211	7	ct07-spike	.82040434259710104392	4.5372854601708603184	.00053959999999999999718
ENSDART00000014721	578.985	725.241	1852.63	801.873	494.794	788.389	851.265	728.717	1270.33	957.242	350.133	185.76	9	ct09-spike	.85591722711505502375	5.234153285408090106	.00019100000000000000766
ENSDART00000014753	80.2813	83.2222	90.3266	400.847	356.178	702.154	87.2231	51.4996	60.3424	95.9982	384.888	361.235	17	cos_per_28_ph_17	.83567442662988100643	4.8115688551491198055	.00035557999999999998029
ENSDART00000014843	51.4371	141.463	131.134	95.4097	75.4514	39.7828	62.3677	84.1185	115.861	114.932	52.4093	83.7299	8	ct08-sine	.83856978803639903308	4.8675087781865196135	.00032702000000000002334
ENSDART00000014871	6825.75	6425.84	9183.05	7147.1	3671.29	4769.85	6046.38	7487.98	6180.83	5485.44	3265.19	5144.69	7	cos_per_22_ph_7	.84416270879631605251	4.9795586269353799835	.00027689000000000001372
ENSDART00000014899	6443.47	4863.78	5573.78	4801.11	4997.71	6039.02	5854.63	6262.02	6390	4257.17	3842.6	5668.8	2	ct02-box2	.81204520117804301904	4.4001651954764797736	.00066735999999999998013
ENSDART00000014927	260.197	269.242	662.302	326.01	266.904	145.57	230.678	378.271	601.602	542.978	87.9631	187.328	9	ct09-spike	.87093684348933597672	5.6047462886191699027	.00011309999999999999795
ENSDART00000015034	839.398	1633.45	1431.24	987.817	576.679	545.42	749.123	990.079	917.87	303.677	199.246	504.852	6	cos_per_23_ph_6	.83316897895960695397	4.7642378824572499951	.00038182999999999999493
ENSDART00000015051	35.2753	10.8832	193.098	24.9287	40.8447	43.8122	54.7508	30.9364	82.0185	66.9458	40.6196	30.3643	8	ct08-spike	.81505584049833401661	4.448586688652260257	.00061892999999999995762
ENSDART00000015190	355.67	496.247	727.87	282.946	279.151	212.266	328.477	474.07	608.496	389.425	103.541	259.161	7	cos_per_23_ph_7	.89294511189006298135	6.2726709008027299319	.000046146999999999997104
ENSDART00000015230	2367.74	2805.62	5491.49	2099.95	1653.6	1475.35	1456.09	2430.56	3997.88	4684.45	1577.05	674.473	7	cos_per_26_ph_7	.85920416801980104005	5.3105308213092996539	.0001711700000000000027
ENSDART00000015302	884.144	855.41	954.192	747.2	579.248	602.059	996.976	921.356	1116.55	702.964	325.78	309.451	5	ct05-box1	.88076137707225599094	5.8814300627793096865	.000077442999999999996975
ENSDART00000015559	4373.19	2922.19	3821.76	2774.14	2932.7	2480.28	3312.4	4053.22	4506.4	2259.39	1415.34	2113.97	4	ct04-box1	.81726849435519499654	4.4848558858285798578	.00058509999999999996474
ENSDART00000015682	1087.13	1159.36	1248.12	610.007	520.452	414.266	534.235	743.328	906.112	513.978	152.527	463.508	5	ct05-box1	.82291791345768294796	4.5802126787099002314	.00050515000000000000006
ENSDART00000015688	1529.44	2124.71	1281.88	1686.66	933.24	1308.87	1515.15	2118.8	1537.48	872.535	1297.64	1247.26	3	ct03-spike	.83154510407106396741	4.7340755334742103955	.00039961999999999999909
ENSDART00000015761	124.955	149.3	172.431	362.231	273.016	212.532	108.933	127.848	171.971	165.844	280.055	175.405	14	cos_per_25_ph_14	.81653606158188296593	4.4727847824682998024	.00059613000000000005395
ENSDART00000015841	4508.76	3842.95	7684.45	5653.54	3036.18	2190.34	2484.22	4414.93	6371.43	4778.07	2312.22	3281.35	9	ct09-spike	.86785424562422097683	5.5239366993151399754	.00012657999999999999764
ENSDART00000015872	1068.95	1649.56	2029.61	1040.86	1064.19	1157.13	1609.29	1928.45	2204.23	1162.71	438.737	1351.68	7	cos_per_22_ph_7	.87129916347693203704	5.6144213257047601573	.00011158999999999999378
ENSDART00000015938	1044.78	904.16	342.002	612.323	488.617	644.296	1159.43	762.791	290	190.979	357.75	368.694	1	ct01-spike	.87741647098810804373	5.78374864763267027	.000088413999999999997475
ENSDART00000015956	287.154	484.923	525.185	287.268	270.571	244.538	374.093	413.157	541.122	95.1752	216.157	322.288	6	ct06-spike	.84161366966427297864	4.9278180893337095725	.00029893999999999998048
ENSDART00000015979	3564.21	3905.37	4260.13	3562.03	2702.96	3554.62	4243.83	4051.72	4588.23	1908	2305.19	4728.62	2	ct02-box2	.82423366098722905537	4.6030136278888598156	.00048779999999999998491
ENSDART00000016019	1139.32	1494.94	1898.22	1210.55	929.751	1146.56	1403.18	1020.57	1711.65	913.523	832.463	728.444	7	ct07-spike	.81384015464736703116	4.4289074319390699941	.00063814999999999998028
ENSDART00000016071	241.321	241.406	431.159	197.492	239.499	212.079	208.413	293.196	647.622	449.096	229.765	217.077	9	ct09-spike	.84332611765841603013	4.9624501789439099397	.00028397999999999997463
ENSDART00000016112	820.021	828.185	1242.34	836.1	819.724	605.41	658.098	647.071	1182.86	878.25	641.692	882.164	9	ct09-spike	.89526735528564604927	6.3544281352068603397	.000041521999999999999881
ENSDART00000016273	479.382	519.719	384.034	390.754	332.111	352.341	519.634	435.515	460.512	172.312	251.623	223.633	3	ct03-box1	.82269283338976595399	4.5763351871302999641	.0005081600000000000136
ENSDART00000016314	605.406	999.421	949.73	672.552	469.358	465.895	546.143	559.695	1114.84	1032.26	208.597	358.219	7	cos_per_25_ph_7	.84752946641381898818	5.0497067649829201486	.00024972999999999998238
ENSDART00000016368	975.125	1313.6	1744.75	1199.99	878.648	1226.58	1236	1353.29	1684.78	778.8	909.92	1118.07	7	ct07-spike	.87617663184706995327	5.7484862684237700847	.000092775999999999993998
ENSDART00000016488	1078.26	933.875	1562.07	1049.3	1198.12	1212.64	1135.25	990.701	1417.89	841.113	1089.36	1082.82	8	ct08-spike	.83904408859106305307	4.8768033726493102975	.00032250999999999997335
ENSDART00000016530	27.0104	17.0501	25.7729	20.9292	14.8998	53.5654	12.8316	19.943	36.6493	30.851	21.673	52.4241	20	ct20-spike	.86950424862676500837	5.566859930501900422	.00011921000000000000552
ENSDART00000016604	5201.88	4889.44	6263.2	4193.53	3606.71	5174.98	6247.23	5552.12	6621.33	2782.64	3079.33	4280.67	2	ct02-box2	.82463848224487201755	4.6100754654229598728	.00048255999999999998765
ENSDART00000016612	1574.85	1353.76	2166.54	1554.17	1140.63	1124.62	1489.96	1254.37	2117.99	2214.8	708.699	1281.09	10	ct10-spike	.81901660621283300934	4.5139319928157304318	.00055938999999999999575
ENSDART00000016614	7148.55	9711.02	9850.3	5551.48	4429.28	5462.62	5983.26	7798.92	8945.93	7433.75	3728.46	4096.03	5	cos_per_25_ph_5	.93446592290732799491	8.2994503831957491258	.0000042610999999999997416
ENSDART00000016635	1878.25	2985.16	4300.5	1461.08	1780.05	1610.59	2225.65	2979.18	4004.23	2688.03	1211.37	1157.39	7	ct07-spike	.90363637254470097204	6.6718325286761004378	.000027780000000000001686
ENSDART00000016660	300.09	364.903	348.819	231.067	258.969	208.957	363.608	305.409	255.195	82.8482	84.9369	195.263	3	ct03-box1	.81085876982786697642	4.3813689196891996147	.0006872300000000000457
ENSDART00000016780	3378.78	4987.78	4301.95	3556.3	3228.82	3377.34	4215.26	4307.57	4672.06	2358.82	2425.54	3114.4	6	cos_per_22_ph_6	.87252878068391304112	5.6475416237118603036	.00010658999999999999421
ENSDART00000016791	7986.91	10147.9	9520.77	6965.38	9258.11	9749.87	10809.2	8925.87	9806.1	4822.39	7861.23	9317.04	1	ct01-box2	.84769842652121796256	5.0532831936889497371	.00024842000000000001017
ENSDART00000016867	1584.12	3531.16	84.6995	44.8114	7567.84	55.7757	1050.31	367.595	410.447	224.747	3667.03	84.3451	16	ct16-spike	.82531805219374398952	4.6219799491622897136	.00047385999999999999302
ENSDART00000016913	1607.31	1295.16	2061.6	1856.65	703.659	1131.54	1292.59	1836.39	2183.63	1789.32	743.778	391.484	7	ct07-rigid	.85606727881743605035	5.2375872670695597932	.0001900600000000000065
ENSDART00000017052	11132.4	8408.33	7357.11	5588.49	3780.12	10317.3	13353.5	6615.88	8790.42	2846.02	4438.53	7065.45	1	ct01-rigid	.83111767246787204844	4.7262020810653604386	.00040441000000000001252
ENSDART00000017075	2040.28	2062.31	1703.54	1042.2	1328	923.536	2119.03	1505.5	1334.43	236.496	518.957	443.449	3	ct03-box1	.83773002397261897567	4.8511436990294702909	.00033511000000000000856
ENSDART00000017144	500.705	584.757	865.524	665.537	646.033	459.39	568.413	682.841	726.652	790.922	550.379	510.822	9	ct09-rigid	.89759351245695595534	6.4389399712951700394	.000037261000000000001205
ENSDART00000017165	991.239	1039.65	234.836	769.075	349.696	416.103	814.944	644.159	121.825	120.878	243.147	192.766	2	ct02-spike	.82028984130793503038	4.5353493604730097388	.00054122000000000002572
ENSDART00000017230	649.607	860.406	1017.96	679.794	734.035	539.334	559.056	569.96	1002.66	612.12	541.508	579.524	7	ct07-spike	.87351641182232797611	5.6744690207919497027	.00010270000000000000266
ENSDART00000017244	74.1571	11.5158	80.7177	131.777	38.8563	27.8916	93.9646	29.789	48.3768	167.605	54.6262	72.6015	12	ct12-spike	.82938835161734003609	4.694622083874810059	.00042422999999999999555
ENSDART00000017259	249.219	199.965	51.6863	157.897	57.4363	297.623	291.816	104.556	107.959	62.1995	85.4244	273.278	22	ct22-spike	.89342029684697898961	6.2891948092437601758	.000045169000000000000708
ENSDART00000017292	85.1207	159.418	92.0673	96.4441	46.016	52.8877	112.603	107.569	86.4441	91.4835	55.992	63.6013	5	ct05-rigid	.82969196953359203306	4.7001350021587802175	.00042069999999999998022
ENSDART00000017305	119.02	144.971	277.029	95.9164	84.0674	98.2446	168.334	132.611	246.685	72.144	76.3217	127.398	7	ct07-spike	.90763190700649398757	6.8375651451617995846	.000022634999999999999277
ENSDART00000017307	219.737	361.209	373.835	324.969	314.165	204.616	265.896	327.253	362.9	272.282	164.913	310.733	9	cos_per_21_ph_9	.84227790229271404243	4.9411901058636598094	.00029306999999999998417
ENSDART00000017326	1765.64	3824.92	782.768	2685.88	1099.76	1414.59	2656.54	3449.44	701.74	254.377	715.734	943.404	3	ct03-spike	.84670566098905197805	5.0323468243218298923	.00025618000000000000363
ENSDART00000017329	507.058	505.17	136.388	490.512	405.762	478.632	509.056	407.692	73.6912	293.286	411.675	486.293	21	ct21-box2	.91241797052575202009	7.050094203035220275	.000017490999999999999061
ENSDART00000017349	2940.79	3565.89	3307.91	2327.82	1356.76	2179.2	3064.75	3281.14	2680.31	1665.43	1589.33	3236.94	5	cos_per_22_ph_5	.95842251655103094521	10.621227510208200329	.00000045621999999999999166
ENSDART00000017424	6371.03	3486.69	8518.7	8549.16	5354.39	5539.83	4591.8	4833.59	10560.5	8700.92	6000.4	1929.23	10	ct10-spike	.85883424622753901101	5.3018122644228302676	.00017332000000000000075
ENSDART00000017510	831.636	576.647	243.524	259.519	419.779	2501.71	503.983	207.978	256.662	68.9489	283.34	2363.7	21	ct21-spike	.97276961622249003003	13.272261531085499442	.000000056321999999999999687
ENSDART00000017553	1839.23	2030.37	3025.87	1639.73	955.139	1791.65	1988.98	2228.12	2969.54	1618.08	1113.57	72.9316	7	ct07-rigid	.83021068373248296801	4.7095845172467303286	.00041470999999999999183
ENSDART00000017576	3294.44	2585.66	3679.12	4118.41	1210.24	3017.47	2319.38	3450.25	3458.18	2505.79	1082.18	3120.86	4	ct04-box2	.83703504555961705247	4.8376875039161699732	.00034193000000000000086
ENSDART00000017594	44.2725	29.1693	30.5086	30.7655	123.224	56.8225	40.1432	30.3248	32.4032	115.546	87.7408	44.7574	17	cos_per_21_ph_17	.82189096385700199932	4.56257522658138015	.00051900999999999997917
ENSDART00000017668	387.26	268.373	761.284	431.251	598.675	321.368	424.464	506.873	944.548	294.454	337.405	71.9733	8	ct08-spike	.81394190944240896179	4.430547973209369772	.00063652000000000001113
ENSDART00000017677	39.936	19.6725	18.9793	26.9142	131.245	33.8221	22.3393	36.3449	25.2752	37.0895	114.463	54.2565	16	ct16-spike	.95853937937799005287	10.637165250354799539	.00000044994000000000001748
ENSDART00000017686	2261.94	1218.71	1096.62	904.429	750.894	1053.13	1465.62	1365.72	1001.53	227.997	509.214	1441.29	1	ct01-rigid	.85123461188403903854	5.1294121182656402524	.00022227999999999999278
ENSDART00000017709	770.64	945.093	1380	1118.14	645.361	818.014	870.23	921.139	1416.46	795.946	650.963	283.161	8	ct08-rigid	.85736383373682700793	5.2674671825815195803	.0001820699999999999966
ENSDART00000017756	112.226	130.591	41.6592	38.9111	10743.5	18.9079	460.942	173.125	141.368	22.2911	10437.8	21.9029	16	ct16-spike	.99943072795267995367	93.678426442482205516	2.2204000000000000488e-16
ENSDART00000017956	187.098	146.651	62.416	255.797	2659.08	283.816	215.399	335.026	199.919	108.822	2104.94	237.476	16	ct16-spike	.98676237117205500837	19.24130470348969979	.0000000015655000000000000223
ENSDART00000017962	1224.43	1138.35	1742.17	1433.33	580.772	760.233	881.466	934.447	1851.46	1124.42	367.153	345.587	7	ct07-rigid	.84982817350971096015	5.0988378194825898504	.0002324100000000000059
ENSDART00000017966	995.158	747.523	2080.25	1083.56	741.322	750.186	970.602	1459.74	1664.59	1122.22	778.995	338.266	8	ct08-rigid	.85198896796928602626	5.1459756900387398915	.0002169899999999999943
ENSDART00000017968	260.263	232.081	241.59	208.869	125.173	117.7	306.9	277.302	273.185	145.401	105.634	170.017	4	ct04-sine	.89494931013962497612	6.3430799396461097217	.000042132999999999997927
ENSDART00000018010	261.965	1106.5	304.739	213.619	498.786	215.419	341.288	663.413	316.769	171.779	196.401	284.878	4	ct04-spike	.87887595616552505184	5.8259043243065899986	.000083487999999999997543
ENSDART00000018071	528.52	1289.26	1551.61	637.122	839.902	604.582	881.114	1127.4	2010.13	450.565	519.938	929.625	7	ct07-spike	.91582315108438494544	7.211698754795889954	.000014430000000000000755
ENSDART00000018107	32.0217	43.2781	54.8256	54.874	57.1926	114.882	48.5519	37.6913	49.4911	63.8794	81.3551	76.8824	19	ct19-spike	.82565166589190497337	4.6278470975865095838	.00046963000000000001488
ENSDART00000018202	2868.43	3845.9	4480.76	3483.05	2666.13	3310.55	2591.65	3204.94	4120.41	3709.12	2721.24	2631.36	8	ct08-sine	.84929894941762895666	5.087435140079639595	.00023630999999999999228
ENSDART00000018204	4660.63	5968.12	821.061	1765.2	350.24	2496	4275.39	1972.53	467.807	205.763	258.304	4078.22	0	ct00-box1	.84820870417102101069	5.0641176294286500692	.00024450999999999997476
ENSDART00000018251	49.2574	48.1369	50.0892	29.5035	29.0522	23.5703	48.5987	45.9175	35.9659	42.133	30.2082	33.0557	4	ct04-sine	.82298970166343898835	4.5814507901198497919	.00050418999999999995505
ENSDART00000018261	4005.97	3837.35	4971.66	3712.29	1226.25	2297.2	3649.12	4246.41	3390.05	2408.06	1350.1	2194.06	6	cos_per_23_ph_6	.88615253094233004116	6.0472564543944100635	.000062030000000000000719
ENSDART00000018300	80.1679	41.8416	38.1696	14.0438	195.747	47.2106	66.5523	30.3379	33.6585	53.0657	94.8658	51.4433	16	ct16-spike	.81683810328216499563	4.4777547925939495954	.00059155999999999998081
ENSDART00000018328	631.828	719.555	679.712	476.238	377.484	346.181	513.924	566.804	520.335	670.812	267.7	411.372	6	ct06-box2	.83930944942792495844	4.8820198654395703386	.00032002000000000001582
ENSDART00000018475	699.631	1633.11	2915.89	1431	776.938	853.774	483.125	538.372	2479.44	3897.2	1174.58	546.787	9	cos_per_26_ph_9	.83007054086077702859	4.7070276390791203625	.00041632000000000002555
ENSDART00000018503	13683.2	13278.4	11595.9	9765.07	8193.41	8993.6	9126.19	11776.6	10256.2	6674.69	5645.77	6537.73	3	cos_per_25_ph_3	.83097850775457104966	4.7236444677381603796	.00040597000000000001791
ENSDART00000018626	1238.44	1375.16	2188.63	1198.76	1350.44	1270.49	1349.34	1628.33	2089.33	1486.53	844.353	1293.07	7	ct07-spike	.9026474466736510438	6.63231772891446969	.000029184999999999999246
ENSDART00000018739	963.464	2378.23	2531.65	1635.98	1067.35	1252.28	1414.72	1700.31	2305.97	1310.08	710.493	600.649	7	cos_per_23_ph_7	.89941492874477302344	6.5070389197959004335	.000034171000000000001991
ENSDART00000018743	76.6812	82.9411	54.0524	149.537	129.349	122.927	65.4954	44.1311	85.3616	126.735	183.9	242.7	17	ct17-box1	.82865406925505602498	4.6813443870357200893	.00043287000000000002125
ENSDART00000019063	1641.61	1601.7	2194.77	1614.8	1365.19	1267.19	1606.68	1887.36	2213.26	1505.95	1195.76	361.608	7	ct07-rigid	.86100452599441001933	5.3534209020364196263	.00016101999999999999993
ENSDART00000019076	315.672	387.694	334.225	239.06	176.109	189.371	231.502	323.257	320.558	122.43	263.063	152.093	5	ct05-box1	.81924758113215601085	4.5178021294841999023	.00055606000000000003949
ENSDART00000019235	3730.49	4183.81	5824.62	2261.46	2790.04	1706.79	2441.36	3373.69	4883.79	5677.88	1211.8	1773.9	6	cos_per_26_ph_6	.8242975039399480508	4.6041258605304395957	.000486969999999999981
ENSDART00000019252	5381.31	7170.15	5435.17	4932.28	2437.02	3682.11	5332.23	5664.02	4371.24	2305.81	2835.63	3852.15	5	cos_per_22_ph_5	.89867098874749795634	6.4790146526791403403	.000035407999999999997093
ENSDART00000019289	1355.15	1520.48	2684.09	1652.82	969.246	1114.47	1038.43	1371.84	2586.49	2668.61	748.84	180.714	8	cos_per_25_ph_8	.86438492829218205316	5.4360746889015203465	.00014321000000000000613
ENSDART00000019326	7615.26	5083.06	13605.6	8060.7	6921.33	6086.09	6294.8	8025.11	10374.4	7895.48	3522.52	4794.15	9	ct09-spike	.85420110121909798018	5.1952277106392603656	.00020204000000000001038
ENSDART00000019392	1803.22	2154.84	2208.41	2417.02	1490.52	1780.6	2241.14	2509.74	3078.87	2260.44	1008.28	1474.66	7	cos_per_23_ph_7	.82971547958558700131	4.7005624417129396875	.00042042000000000001678
ENSDART00000019439	151.272	280.013	301.657	257.589	188.491	174.104	190.113	238.896	356.809	116.963	107.282	146.901	8	cos_per_22_ph_8	.84630389609894096647	5.0239269722840802501	.00025936999999999997817
ENSDART00000019440	53.5227	34.181	93.697	97.1987	72.4101	155.482	81.2993	70.6486	69.3663	32.3	106.406	170.638	19	ct19-spike	.86137839641180002914	5.3624243882289803764	.00015897000000000000432
ENSDART00000019446	33.9766	60.3724	62.39	72.792	38.6067	23.6868	34.2141	33.8725	82.455	63.8098	38.5874	52.4461	10	ct10-spike	.82394298483053995952	4.5979565600854597207	.00049160000000000002307
ENSDART00000019636	119.029	241.457	335.764	194.952	186.951	205.642	156.379	235.657	330.136	176.128	190.006	103.078	7	ct07-spike	.90485562935316599109	6.7213530942654804434	.000026120999999999999444
ENSDART00000019704	367.523	222.32	85.28	258.602	213.259	323.878	346.671	299.025	76.161	43.7234	155.388	184.37	23	cos_per_27_ph_23	.83248105280394202321	4.7514114932746300823	.0003892899999999999811
ENSDART00000019705	630.397	507.498	456.202	635.962	335.248	457.026	563.615	565.973	538.904	523.512	380.381	501.637	5	ct05-box2	.83231988216629004818	4.7484168424897497118	.00039104999999999999136
ENSDART00000019780	354.185	275.084	473.306	168.68	303.563	161.547	238.815	268.53	566.592	316.329	194.545	181.883	8	ct08-spike	.85582303725499397906	5.2320002467783002231	.00019159000000000000032
ENSDART00000019809	655.461	837.668	1063.23	663.686	435.836	668.993	842.205	953.664	906.518	520.161	367.067	116.768	5	ct05-box1	.85526646409423001671	5.2193174206785100111	.00019513000000000001047
ENSDART00000019831	6927.09	6718.3	3733.95	6313.07	3670.96	2807.9	6799.25	8568.13	1960.09	2557.03	3520.98	240.614	2	ct02-spike	.81402336091842897314	4.4318620448740295714	.00063522000000000003374
ENSDART00000019843	29.3737	52.9905	11.0489	32.576	304.645	15.9458	32.5288	32.7058	37.8852	110.296	111.233	27.3369	15	ct15-spike	.82580983987082900999	4.6306341739024503568	.00046763000000000002048
ENSDART00000019941	83.7759	38.6668	63.5127	73.7556	139.994	93.5093	71.0853	47.9853	49.3554	27.6361	158.048	66.8183	17	ct17-spike	.89945721644343001877	6.5086407397564896016	.000034101999999999999772
ENSDART00000019991	802.977	1167.45	1437.23	977.121	768.209	649.251	968.428	904.099	1081.98	804.17	543.791	187.512	7	ct07-rigid	.85616962881304203847	5.2399324227736601145	.00018942000000000001263
ENSDART00000020048	1519.03	1122.77	1199.55	1006.45	3446.85	1603.05	1706.73	733.536	1086.52	602.794	2186.94	1238.52	17	ct17-spike	.83692466966471201761	4.8355576207937103206	.00034301999999999997857
ENSDART00000020082	1234.53	1403.43	2121.27	1181.27	1416.7	1068.54	1362.97	1660.8	2220.03	1302.29	1004	1010.11	7	ct07-spike	.93692064414626197166	8.4762404762575496164	.000003535400000000000066
ENSDART00000020327	676.409	623.163	880.828	510.818	382.781	263.772	456.136	646.282	616.725	377.079	151.001	235.601	5	ct05-box1	.87320758435314704826	5.6660174455651199921	.00010390000000000000472
ENSDART00000020409	295.255	360.096	475.841	352.636	319.635	176.049	367.837	497.477	630.712	116.661	127.829	258.928	8	cos_per_21_ph_8	.83196503142432298716	4.7418372978439702337	.00039496000000000002677
ENSDART00000020506	1025.07	791.765	1874.92	900.813	952.802	879.711	1060.72	1082.8	1544.12	627.5	646.918	954.076	8	ct08-spike	.89224506938958703106	6.2485160510807595813	.000047617999999999997081
ENSDART00000020569	658.831	501.704	301.434	787.606	181.993	396.235	253.65	198.89	382.436	951.51	334.845	315.765	12	ct12-spike	.83135667494331899618	4.7306012480024204336	.00040171999999999999592
ENSDART00000020575	1604.63	2057.05	2326.75	1386.86	1399.95	1047.64	2020.1	1377.11	1789.01	819.116	741.914	1012.24	4	ct04-box1	.81327207656861699725	4.4197707211364800628	.00064729000000000001813
ENSDART00000020603	1150.75	919.863	1838.45	1125.72	1298.19	931.88	628.81	1049.98	2669.2	1155.08	841.113	842.07	8	ct08-spike	.88948476954392097227	6.1553925071190001006	.000053779000000000001282
ENSDART00000020607	1755.03	1674.05	759.466	1443.07	1663.95	1551.33	1735.47	1797.06	1017.61	218.024	1542.08	1769.15	22	ct22-box2	.82526508073894699891	4.6210497568828001747	.00047453000000000002557
ENSDART00000020628	89.0118	85.2667	19.7562	62.5062	53.9151	43.5961	92.1301	100.363	39.0777	26.783	28.0788	33.3864	2	ct02-spike	.90928354632256203072	6.9090937452606002722	.000020741000000000000132
ENSDART00000020686	54.0011	191.964	89.2668	46.0084	91.7086	92.0955	52.5219	191.432	133.105	43.1948	91.6637	85.8756	5	ct05-spike	.91867949876114196606	7.3546631049529196389	.000012201999999999999386
ENSDART00000020750	5447.05	10050.8	7555.41	4946.44	6058.67	7049.69	8645.04	10675.7	9063.1	3382.63	4281.74	5527.12	5	cos_per_23_ph_5	.82276907003576005284	4.5776477816008700472	.00050713999999999999965
ENSDART00000020969	159.942	113.567	56.9869	105.687	53.9319	120.652	205.727	121.766	86.0138	90.4892	120.239	114.605	1	ct01-spike	.821570298668429011	4.5570961082458101288	.00052340000000000003709
ENSDART00000021006	2617.09	2959.16	789.246	1668	1031.33	1928.23	3329.07	1997.68	939.699	226.64	538.711	377.659	2	ct02-spike	.8425875645745980469	4.9474505058807203284	.00029035999999999997792
ENSDART00000021141	151.634	98.718	139.164	129.812	39.6953	75.1627	157.186	177.992	143.639	50.411	33.2055	95.1193	5	cos_per_23_ph_5	.82025040494955403503	4.534682918055599643	.00054177000000000001198
ENSDART00000021272	383.407	600.073	633.131	577.614	438.645	296.099	486.302	633.184	703.33	650.919	296.505	268.811	8	cos_per_23_ph_8	.94814132684077800928	9.4330502205903794533	.0000013534000000000000355
ENSDART00000021299	655.487	846.153	295.128	472.894	467.481	409.919	883.667	576.674	347.551	165.737	237.043	264.68	2	ct02-spike	.86248412208477698293	5.3892508176034796818	.00015301999999999999521
ENSDART00000021317	563.159	1098.43	1180.65	628.348	557.466	505.753	752.894	608.434	1028.32	848.279	293.245	73.3283	7	ct07-rigid	.85176890512382497089	5.141131705588359857	.00021851999999999998812
ENSDART00000021319	1144.79	1468.68	1766.1	1441.8	1096.52	1336.53	1484.11	1515.94	1713.59	902.309	981.267	1463.43	8	cos_per_20_ph_8	.86461087555211202371	5.4417012802498403445	.00014207999999999999493
ENSDART00000021396	81.6452	46.8102	82.6402	108.543	158.38	162.417	87.8895	66.1834	102.352	100.153	180.805	81.4633	16	ct16-rigid	.85570919627557895382	5.229400608900170333	.00019231000000000000698
ENSDART00000021434	307.137	1090.25	704.849	415.922	348.149	381.704	420.678	754.271	563.318	345.932	319.597	285.819	5	ct05-spike	.9219690308201820006	7.5285205456527899415	.000009982100000000000532
ENSDART00000021662	316.292	494.558	331.95	302.108	266.879	253.672	408.571	649.885	404.815	282.831	355.824	168.408	5	ct05-spike	.84121127035168496988	4.9197545176178003601	.00030254000000000001377
ENSDART00000021672	280.282	528.429	510.366	325.808	277.002	356.76	296.313	390.185	545.757	132.687	206.828	304.838	6	ct06-spike	.84923186254183902211	5.085993624607599628	.00023681000000000000444
ENSDART00000021715	5145.96	4361.09	894.69	2393.6	1726.72	1574.66	4176.23	2568.4	489.392	508.511	1151.05	2461	2	ct02-spike	.84299734838025597305	4.9557610698653702386	.00028680999999999997295
ENSDART00000021782	232.825	313.547	505.638	257.757	184.293	191.001	226.298	265.981	368.074	176.428	79.674	55.1176	7	ct07-rigid	.84986107533704302597	5.0995485513967997449	.00023216999999999999465
ENSDART00000021950	10649.4	8250.72	10862	10746.2	4618.92	7161.25	8705.56	8281.73	9079	7522.7	3724.94	6463.84	5	ct05-box2	.87380080950232397186	5.6822776032244597388	.00010160000000000000303
ENSDART00000022147	1599.27	1327.73	1424.73	693.427	637.267	498.841	669.63	1028.9	1494.28	1441.12	471.888	45.7281	4	cos_per_28_ph_4	.8994377343729920149	6.5079026575933403009	.000034132999999999999983
ENSDART00000022325	720.728	623.568	1015.92	812.475	714.847	531.54	738.111	958.996	947.981	644.328	395.122	957.162	9	cos_per_20_ph_9	.82550104299112903039	4.6251962606666898736	.00047153000000000000686
ENSDART00000022379	561.103	573.092	972.744	991.572	692.637	668.801	728.119	963.273	966.834	966.074	459.035	930.03	10	cos_per_20_ph_10	.81495957164567001119	4.4470219650060300864	.00062043999999999998891
ENSDART00000022413	453.434	700.339	758.465	727.654	476.418	461.229	681.913	933.026	793.115	373.848	355.721	651.83	8	cos_per_20_ph_8	.94418845712470400589	9.0641585248885192527	.0000019408999999999999163
ENSDART00000022481	5640.68	6248.1	6460.97	4737.58	3176.91	3900.35	4445.3	4651.47	5280.03	1935.5	2519.61	2203.13	5	ct05-box1	.81827371225609601968	4.5015294094684801252	.00057019999999999998203
ENSDART00000022620	3948.41	3275.35	4342.82	3058.08	1363.86	2234.97	3429.13	3919.09	3798.74	2674.72	2351.13	3071.9	5	cos_per_23_ph_5	.84179626751925695771	4.9314863884268795857	.00029732000000000000615
ENSDART00000022640	230.871	347.035	481.587	200.357	203.185	154.4	230.78	285.428	384.838	201.658	124.183	90.0751	7	ct07-rigid	.89441525304098201676	6.3241332835481900432	.000043174999999999999132
ENSDART00000022646	558.13	866.613	1169.67	672.445	809.197	688.032	1034.35	1099.52	2156.52	770.721	641.347	471.448	7	ct07-spike	.81944816361984296194	4.5211684452084703878	.00055318000000000001285
ENSDART00000022663	369.148	309.978	220.828	288.842	273.195	327.966	333.168	347.303	289.751	182.054	234.101	279.964	0	cos_per_25_ph_0	.8333438625212310491	4.7675100878414502503	.0003799499999999999926
ENSDART00000022682	285.438	425.626	452.573	273.114	189.661	256.771	270.794	306.457	411.248	393.61	146.072	137.029	6	cos_per_25_ph_6	.89194868990708497947	6.2383563120160996363	.000048251999999999998126
ENSDART00000022688	3788.64	9421.57	4359.19	2884.61	2041.06	3275.54	5945.57	5866.75	4738.06	2139.87	836.53	1816.38	4	ct04-rigid	.88573706029195797829	6.034086779220300123	.000063124000000000000748
ENSDART00000022694	1549.52	1569.09	135.236	1343.31	278.176	851.332	1718.27	1119.54	141.402	186.058	336.947	226.598	2	ct02-spike	.812987007039350007	4.4151998738469098171	.00065191000000000001117
ENSDART00000022724	428.41	338.956	640.194	363.662	210.944	276.409	386.559	467.981	860.269	465.903	149.303	382.036	9	ct09-spike	.8367014551087069707	4.8312563468933298338	.00034524000000000002169
ENSDART00000022758	990.905	662.975	736.448	661.251	342.004	558.845	818.096	983.86	901.831	49.5179	305.575	642.274	3	ct03-box1	.81029285405770901107	4.3724589934278501602	.00069685999999999999246
ENSDART00000022765	657.661	718.84	1217.36	612.368	466.607	546.164	716.51	964.884	1344.56	685.445	483.089	869.02	7	ct07-spike	.89966988088804000778	6.5167108114288803122	.000033754999999999997843
ENSDART00000022838	909.145	494.359	435.342	1310.42	1568.52	941.616	952.41	1173.97	834.919	1242.42	2888.19	586.9	15	ct15-spike	.84583499253772298498	5.014138277315580261	.00026312999999999998283
ENSDART00000022839	14376	12546.5	19000.2	15286.1	14345.7	14902.8	15011.8	15801.2	21478.2	17431.7	16765.8	16828.3	9	ct09-spike	.82737598442863602433	4.6584168375284100705	.00044823999999999997743
ENSDART00000022841	139.774	255.157	425.215	142.685	148.248	124.521	245.766	243.568	531.531	472.826	72.2133	54.4927	8	ct08-rigid	.81307072810285896391	4.4165412971058097824	.00065054999999999995643
ENSDART00000022864	240.035	332.775	490.922	248.154	193.365	250.339	344.364	413.186	593.377	407.027	215.625	316.791	7	ct07-spike	.84758252365969000142	5.0508292557324203642	.00024931999999999997783
ENSDART00000022951	53.2697	129	129.904	196.888	91.1924	65.1349	43.4985	66.2639	66.0576	237.601	140.26	148.773	10	cos_per_28_ph_10	.82855394210504496044	4.679539826840490413	.00043406000000000000139
ENSDART00000022967	1365.06	1572.25	1951.57	1365.5	1183.88	1030.36	1603.38	1644.87	1718.02	406.377	573.888	1401.71	7	cos_per_21_ph_7	.83928029689172800598	4.8814462052567701988	.00032028999999999998444
ENSDART00000023006	221.736	228.584	378.283	164.844	157.653	157.999	198.403	213.955	379.591	138.428	118.473	186.355	7	ct07-spike	.94631577246679199344	9.2577633158087095921	.0000016040000000000000164
ENSDART00000023059	41.8084	72.9117	31.7998	94.1615	44.8749	47.1449	54.9903	46.6866	50.0649	139.852	23.3436	79.5549	12	ct12-spike	.82376798364010395126	4.5949174128634497904	.00049388999999999997573
ENSDART00000023099	2001.13	1761.95	477.062	1459.54	518.29	381.593	1539.2	2446.82	1133.56	280.146	263.043	1022.59	2	ct02-spike	.8296432515019640519	4.6992495082470497891	.00042126000000000001552
ENSDART00000023101	2729.22	1392.94	1864.98	1584.66	1590.21	1974.43	2863.44	1844.15	2061.26	1485.22	1039.2	2244.77	23	ct23-spike	.86730090934714598738	5.5097091544311798117	.00012912000000000001059
ENSDART00000023109	52.9875	108.82	147.042	105.474	54.8085	65.1585	66.5348	86.6685	84.8676	154.272	65.4766	44.6072	9	ct09-box1	.83622632273430497207	4.8221273922173502058	.00034999999999999999644
ENSDART00000023153	152.011	106.913	55.695	161.271	194.8	356.009	167.951	175.468	114.113	142.191	214.821	210.647	19	ct19-rigid	.82038743594141905202	4.5369994809157301319	.00053983999999999998133
ENSDART00000023177	483.485	306.595	119.989	290.506	244.458	334.209	511.125	384.262	195.862	43.2255	147.219	74.5362	1	ct01-spike	.81909110697385500988	4.5151795727653896151	.00055831000000000001286
ENSDART00000023206	378.043	375.908	427.317	231.209	265.207	202.601	297.961	410.164	533.399	159.954	113.127	127.627	5	ct05-box1	.89384390300725202749	6.3040133004147298479	.000044311000000000003163
ENSDART00000023293	105.37	89.6181	63.9648	53.3183	138.035	146.779	112.327	98.3861	92.6255	89.8938	142.645	117.829	20	ct20-sine	.81992011437554201958	4.5291090245693998995	.00054644000000000003334
ENSDART00000023306	278.576	349.796	516.697	248.156	252.399	177.815	336.495	306.174	348.999	163.335	110.83	248.566	7	cos_per_22_ph_7	.81630979609858100865	4.4690688716615802889	.00059957999999999994807
ENSDART00000023316	521.653	678.346	886.237	543.494	499.067	374.766	658.696	577.117	783.575	442.931	234.943	358.324	7	cos_per_23_ph_7	.85674855476282796296	5.2532410240722899886	.00018583000000000000126
ENSDART00000023337	215.455	209.806	354.07	205.261	182.574	146.351	199.791	225.716	333.204	165.731	121.674	75.7871	7	ct07-spike	.87284310023711597637	5.656079695575759736	.00010534000000000000449
ENSDART00000023640	26.5749	42.4982	19.4739	27.4726	33.1376	130.191	17.7844	25.5127	35.8509	21.4713	98.1618	71.0045	19	ct19-spike	.81515840917567694568	4.4502550154182003439	.00061733000000000002715
ENSDART00000023653	177.739	130.37	144.097	74.1597	665.522	225.229	158.725	126.313	137.62	110.736	368.772	89.0852	16	ct16-spike	.89293661440334104462	6.2723763573870501276	.000046165000000000002691
ENSDART00000023794	391.558	566.407	316.271	1416.83	830.484	861.409	249.909	428.863	460.134	1714.65	1185.47	572.617	13	ct13-spike	.91200742871046502902	7.0312183335557500996	.000017892000000000000812
ENSDART00000023803	355.925	268.244	670.515	329.631	304.513	278.471	390.142	440.739	744.756	294.169	191.387	257.949	8	ct08-spike	.91852458910554302118	7.3467256528376303493	.000012314999999999999829
ENSDART00000023831	246.038	411.072	188.434	140.954	117.631	134.965	219.523	366.709	186.888	164.377	124.893	245.918	3	ct03-spike	.92344168974840601383	7.609809678070050154	.0000090979999999999999673
ENSDART00000023834	5799.61	4187.39	5775.54	5534.87	7266.35	7156.4	6015.43	4854.63	6202.97	4104.95	7347.88	7521.97	18	ct18-spike	.83239859577659303103	4.7498789000700201157	.00039019000000000000298
ENSDART00000023851	421.039	1985.88	2521.16	2800.65	656.821	1028.25	1173.54	2365.46	3867.15	2684.8	873.353	1248.51	9	cos_per_23_ph_9	.89602893680993400682	6.3818017994882199062	.000040086999999999997526
ENSDART00000023947	1094.64	1628.8	309.182	894.61	994.995	1127.66	1337.65	1104.9	321.213	211.493	1003.75	964.74	22	ct22-box2	.82798976528273005027	4.6693985529134396373	.00044080999999999997572
ENSDART00000023953	26.3683	30.8889	38.7192	62.9451	78.2565	19.8957	24.1166	29.6669	43.1671	51.5716	61.8485	44.0722	14	ct14-spike	.861040180744017003	5.3542780831242904327	.00016081999999999999507
ENSDART00000023959	171.476	252.294	533.348	573.821	464.977	291.482	192.244	351.049	592.161	231.457	340.365	62.6089	12	cos_per_21_ph_12	.82816252705273796231	4.6724991981376495787	.00043873000000000002274
ENSDART00000023984	351.222	432.672	61.645	199.608	276.814	198.822	321.782	317.269	125.139	146.638	196.584	191.264	2	ct02-spike	.83844668638444896924	4.8651025324145900086	.00032820000000000000865
ENSDART00000024013	100.673	80.0699	16.4767	42.6125	331.223	74.821	70.631	28.4069	32.2236	31.616	142.163	64.9643	16	ct16-spike	.83167901337038896425	4.7365477929724502104	.00039813000000000001166
ENSDART00000024082	733.594	974.53	1471.96	684.094	841.827	446.558	478.568	677.43	1326.26	1774.72	409.934	114.432	8	cos_per_25_ph_8	.81519364409605199473	4.4508284154625004092	.00061678000000000004089
ENSDART00000024256	196.898	365.592	605.038	186.283	249.952	129.448	239.398	281.017	534.457	476.91	174.499	252.457	9	ct09-spike	.82960479067628900562	4.6985506915388404181	.00042170999999999999935
ENSDART00000024304	407.144	1637.78	199.322	342.936	85.9519	120.238	372.982	869.694	208.435	197.744	217.838	65.657	3	ct03-spike	.90781313943688901613	6.8453243958761200716	.000022419999999999998795
ENSDART00000024407	69.0721	18.2889	26.6199	33.4211	692.231	30.7703	44.2557	44.5391	57.7029	19.1443	376.966	40.145	16	ct16-spike	.94200737644469700882	8.8765149276259993627	.0000023423000000000000034
ENSDART00000024499	7591.83	4131.01	510.388	1890.78	417.845	2112.85	3149.7	2613.08	1277.09	136.526	402.863	603.11	1	ct01-spike	.82189028060701396772	4.5625635378870299519	.0005190200000000000282
ENSDART00000024514	642.256	618.245	1148.95	710.176	541.366	619.944	536.862	649.441	939.365	1182.95	569.328	312.011	10	ct10-spike	.82974929945628095318	4.7011774663586303191	.00042003000000000000188
ENSDART00000024576	1706.46	1962.53	2672.51	3377.84	2276.87	2264.19	1693.23	2143.1	3772.54	2525.49	2079.02	2299.74	12	cos_per_20_ph_12	.83681804387563696324	4.8335019723912502343	.00034408000000000002602
ENSDART00000024627	3175.79	3703.08	3551.37	3250.26	1900.85	2700.11	2520.92	4180.5	3976.69	3836.78	1333.47	3895.98	4	ct04-box2	.81472382647884700191	4.4431948634134101894	.0006241299999999999756
ENSDART00000024726	1491.48	1542.69	976.811	1094.54	729.389	1104.18	1305.32	1523.45	1055.14	142.906	586.962	1051.23	3	cos_per_23_ph_3	.85579269346384001516	5.2313070477106196066	.00019179000000000000518
ENSDART00000024750	306.538	299.142	322.761	181.031	109.794	134.931	255.814	237.716	198.569	318.357	92.6548	151.704	6	ct06-box2	.83586555803368800532	4.8152199739368297671	.00035364000000000000903
ENSDART00000024768	5200.62	7887.2	10278.2	4776.83	2564.79	3005.75	4556.46	6790.75	8042.39	10298.4	2627.08	4189.45	6	cos_per_26_ph_6	.86053674943554203658	5.3422032067532398969	.000163609999999999987
ENSDART00000024847	89.6535	78.1808	87.9889	70.1988	62.7654	55.0059	89.7275	77.2595	73.6824	55.3867	36.1408	55.4772	4	ct04-box1	.84092909318405995034	4.9141167331739801227	.00030507999999999999962
ENSDART00000024858	1174.43	871.668	855.162	534.081	252.711	461.033	570.665	1178.32	1240	1068.73	240.868	714.039	3	cos_per_28_ph_3	.83849268422198697248	4.8660013501876502318	.00032776000000000001964
ENSDART00000024872	1593.11	2730.13	3434.34	2157.47	2245.59	1864.27	1886.32	2812.88	2502.66	941.675	1383.74	2478.51	8	cos_per_20_ph_8	.8211082411983029461	4.5492244457159900506	.00052977999999999998617
ENSDART00000025096	1017.56	673.813	586.622	628.693	377.994	623.618	1219.36	629.986	605.608	376.696	318.703	624.905	1	ct01-spike	.88674169595741603178	6.066048516214089581	.000060502999999999999923
ENSDART00000025229	460.358	327.487	785.231	476.381	594.969	326.466	381.978	522.372	843.616	706.486	278.42	473.474	9	ct09-spike	.8323472536810300193	4.7489251456885197555	.00039074999999999998406
ENSDART00000025254	779.434	1738.95	365.449	527.657	349.975	386.214	1198.49	2105.22	241.156	89.6524	259.867	807.841	3	ct03-spike	.94277701596143903551	8.9415386286495408541	.0000021938000000000000699
ENSDART00000025285	2390.26	2362.77	2345.99	1927.36	1421.88	2679.53	2127.22	2450.19	2282.72	987.568	1630.86	3031.95	2	ct02-box2	.84324474856419195934	4.960792858218209922	.00028467999999999999165
ENSDART00000025330	676.693	492.968	724.23	515.702	361.274	479.076	797.164	641.449	790.112	352.52	287.077	379.066	4	ct04-box1	.84679232615480604096	5.0341670606687003442	.00025548999999999998144
ENSDART00000025356	23.3783	25.8216	47.7812	101.827	78.0171	124.469	24.9185	29.4103	40.6546	48.5463	113.887	68.4742	16	ct16-sine	.82809023850727203619	4.6712012828526896513	.00043960000000000000594
ENSDART00000025509	14669.1	14465.3	12701.2	7884.66	6224.84	10739.8	16031.5	15071.9	11316.1	5276.75	9977.23	10373.2	3	cos_per_23_ph_3	.94385605215389900557	9.034876920419060653	.0000019982999999999999935
ENSDART00000025691	140.662	39.1704	42.6051	32.1122	449.04	377.976	55.111	15.248	37.9077	111.046	367.83	24.3609	17	ct17-spike	.84673560407177594911	5.0329755615282198988	.00025594000000000001948
ENSDART00000025820	2579.14	2380.12	2931.87	2066.79	1118.81	1578.38	2168.21	1815.56	2776.65	2049.65	1236.26	230.24	6	ct06-box2	.82986243886001798131	4.7032361495522598815	.00041871999999999997546
ENSDART00000025987	153.294	302.547	78.2682	54.3787	3126.74	95.441	669.471	81.5406	300.166	29.151	890.832	21.0711	16	ct16-spike	.81316143603123403061	4.4179955801885002487	.00064908000000000001285
ENSDART00000026017	3927.96	6725.38	6461.54	5353.06	702.688	407.774	5021.94	4813.6	5337.22	3121.64	300.921	775.277	6	ct06-box1	.92525377762470095711	7.7129808041521696893	.0000080962000000000005126
ENSDART00000026090	956.374	1237.86	1928.88	1225.81	788.561	1409.37	964.457	858.694	1641.12	1394.09	1078.82	689.568	9	ct09-spike	.83268106214584902691	4.7551332560389196757	.00038711000000000002569
ENSDART00000026098	520.745	391.366	482.012	651.641	1210.19	295.396	360.105	418.919	700.963	1131.7	592.376	195.202	15	cos_per_20_ph_15	.8568017801237960418	5.2544683281026296484	.0001855000000000000095
ENSDART00000026189	652.397	766.41	905.528	1279.37	595.856	1993.77	689.254	1121.8	868.582	1149.07	285.233	2179.24	20	ct20-spike	.87290614127166998859	5.6577956742959898406	.00010508999999999999841
ENSDART00000026210	1695.29	2888.54	3861.56	3124.82	1745.27	1401.08	2731.63	2961.12	3560.69	3716.64	1016.33	224.701	8	cos_per_24_ph_8	.90179557534448095968	6.5987345167531898937	.000030439000000000001131
ENSDART00000026249	558.45	773.386	628.267	439.793	368.551	502.755	709.719	559.115	637.476	195.008	329.39	633.3	4	cos_per_22_ph_4	.88060602600009396657	5.876808476527659586	.000077928000000000003343
ENSDART00000026276	107.588	131.603	153.121	629.906	343.998	369.727	85.2856	57.1751	105.907	297.384	398.616	289.544	15	ct15-box1	.87419820696276495653	5.6932301002009504387	.00010008000000000000403
ENSDART00000026416	615.235	464.473	667.034	412.197	310.306	366.819	648.419	527.657	725.67	421.036	279.463	80.2061	5	ct05-box1	.83507329797555396311	4.8001233952775397285	.00036174999999999998389
ENSDART00000026516	1499.86	1655.92	2082.16	1939.72	598.154	1019.74	1678.46	2370.08	1977.22	797.029	513.196	1069.76	7	cos_per_22_ph_7	.91891198714638000489	7.3666164780374296939	.000012032999999999999819
ENSDART00000026658	285.835	203.868	473.226	276.014	207.459	271.885	272.706	287.533	424.717	134.531	175.959	212.188	8	ct08-spike	.86269837457816800352	5.394483544968750266	.00015189000000000001112
ENSDART00000026692	43.9075	167.005	52.5675	49.3617	19.8021	55.6726	43.6611	107.862	39.5464	30.7197	22.5653	47.998	4	ct04-spike	.91285114486432594738	7.0701484696139802466	.000017076000000000000494
ENSDART00000026693	35.329	36.6775	165.634	44.0493	61.7552	25.3233	40.2529	29.584	81.2245	37.5759	34.3847	42.983	8	ct08-spike	.85375358236945897428	5.1851809766058902795	.00020499999999999999559
ENSDART00000026816	251.15	275.362	378.881	166.184	200.106	162.11	146.902	245.537	330.652	229.255	71.5138	62.102	7	ct07-rigid	.84761434064652996234	5.0515026408612797582	.00024906999999999999886
ENSDART00000026866	6312.58	7072.39	9032.84	4957.93	6126.48	4714.36	5323.28	7352.46	9786.42	7823.71	3874.12	4311.36	7	ct07-rigid	.8612523792020509994	5.3593859000969699125	.00015965000000000000458
ENSDART00000026963	713.811	1322.82	1694.09	800.247	401.488	459.75	662.71	1152.32	1418.61	579.077	235.607	184.946	7	cos_per_23_ph_7	.94484671132708797359	9.1229009696195699775	.0000018311999999999999332
ENSDART00000026965	153.731	100.814	179.516	54.6312	268.852	380.358	133.816	53.5	101.038	133.257	348.264	172.9	18	ct18-spike	.82550511329721998344	4.6252678538313096723	.00047147999999999997854
ENSDART00000027013	61.0443	342.267	66.9011	343.493	115.526	1309.28	87.3363	53.7951	142.466	76.4355	145.797	557.565	20	ct20-spike	.85244022321751000693	5.1559398013911801328	.00021387000000000001062
ENSDART00000027119	288.54	389.897	62.0117	317.911	266.429	332.985	341.153	278.235	79.4502	348.127	231.224	409.139	20	ct20-box2	.88790755958432299177	6.1036444703416998792	.000057568999999999997182
ENSDART00000027217	767.25	1008.42	1436.9	754.717	633.06	675.11	692.857	804.249	1114.71	860.38	549.281	558.302	7	ct07-spike	.8880838802798449727	6.1093783689704501683	.000057135000000000000999
ENSDART00000027234	1227.34	1436.5	762.425	437.464	351.499	565.262	1497.1	866.306	722.158	112.621	235.356	464.743	2	ct02-sine	.90570413935635396552	6.7563524941579000682	.000025014000000000001403
ENSDART00000027304	72.3997	169.481	274.081	164.085	41.3957	117.794	174.447	303.599	258.817	94.0322	64.0087	160.891	8	cos_per_21_ph_8	.93523160471047694919	8.3535510730882300834	.0000040231999999999998679
ENSDART00000027454	201.534	151.665	160.421	160.73	635.904	387.201	108.53	166.747	242.127	570.65	467.109	256.538	16	cos_per_22_ph_16	.85977058976651499211	5.3239423435078201408	.00016792999999999999984
ENSDART00000027623	1414.72	1305.54	2547.83	2335.79	2389.15	1920.17	1388.79	1429.36	2303.84	2683.37	1741.4	1877.53	13	cos_per_23_ph_13	.86385943527095998551	5.4230390153602296976	.00014588000000000000598
ENSDART00000027666	183.102	239.273	381.379	347.962	287.28	242.73	422.504	633.065	478.32	110.849	114.593	303.166	9	cos_per_20_ph_9	.81816313512302596411	4.4996891821676099354	.00057182999999999995118
ENSDART00000027718	248.131	300.825	680.828	312.157	274.869	198.683	313.155	272.694	642.823	723.532	171.291	124.564	10	ct10-spike	.84046385321162997428	4.9048512901890797266	.00030932000000000002679
ENSDART00000027720	91.4403	31.766	17.9053	18.5647	155.584	164.034	156.282	47.7482	52.8636	91.9004	163.215	78.3097	19	ct19-box1	.83629233065160901717	4.8233934693362998658	.00034933000000000001811
ENSDART00000027762	394.122	361.887	777.435	334.836	296.633	342.776	440.097	529.902	731.451	425.158	245.853	462.043	7	ct07-spike	.89390775140534994847	6.3062540911500102325	.000044183000000000000323
ENSDART00000027792	1378.58	1015.34	2690.58	1261.54	1523.85	1124.45	1496.25	1820.62	2843.7	2114.88	1149.51	886.146	9	ct09-spike	.87411620163244896364	5.6909660265683204017	.00010039000000000000614
ENSDART00000028225	4239.44	2624.21	7920.21	5324.17	1656.1	1726.83	3913.68	4076.08	9108.71	8928.64	1524.76	673.25	10	ct10-spike	.87686933240863795813	5.7681260876578601682	.000090319000000000000412
ENSDART00000028260	1896.39	1935.12	1640.94	1003.44	1580.81	927.648	2025.74	1583.8	2072.81	814.459	1142.55	181.8	4	ct04-box1	.81777534767358595058	4.4932475331458299195	.00057755000000000002516
ENSDART00000028292	126.497	108.654	48.5349	71.7736	93.5572	83.0779	170.212	36.3084	38.7817	55.0064	49.9655	78.2864	23	ct23-spike	.81113543783569297396	4.3857378965982700691	.00068256000000000002434
ENSDART00000028301	11446.8	7563.55	7741.9	6859.21	1164.17	9266.42	9022	11839	8898.65	2692.13	2731.41	8998.77	3	ct03-box2	.85975685677536795026	5.3236162907157700275	.0001679999999999999907
ENSDART00000028457	3076.85	3210.95	3151.64	2079.78	1770.52	2463.79	3112.99	3340.29	4027.94	2819.56	1992.07	2245.92	3	cos_per_26_ph_3	.90768182843010603023	6.8397003015354300715	.000022574999999999999852
ENSDART00000028606	2481.15	3479.49	1955.1	1071.7	386.736	1451.33	2187.2	3617.81	1752.08	522.875	842.53	689.684	3	ct03-rigid	.93762941378508402046	8.5291538944260700816	.0000033452999999999999718
ENSDART00000028612	1125.34	337.555	188.405	662.509	590.347	720.373	1654.35	771.983	125.076	78.8537	384.355	135.191	1	ct01-spike	.82815113285259800424	4.6722945700448796913	.00043887000000000000446
ENSDART00000028820	2122.19	1827.57	2096.27	2030.51	1256.92	1688	2409.14	2039.05	2412.43	1629.3	1322.13	1090.15	6	ct06-box2	.82257868108487697256	4.5743712129357998464	.00050969999999999997514
ENSDART00000029067	1244.9	1506.93	1674.97	934.352	624.951	837.651	1564.93	1197.02	1340.94	1159.76	434.254	872.847	5	ct05-sine	.87066204423993198702	5.5974335777536303738	.0001142499999999999988
ENSDART00000029102	490.604	509.898	90.8369	313.202	225.084	257.339	582.337	501.353	65.2131	45.1438	122.972	244.051	2	ct02-spike	.89997777833897296684	6.5284378961280697951	.000033257999999999999043
ENSDART00000029157	195.37	309.788	848.002	1151.51	2308.37	1195.75	567.72	230.336	1125.87	1905.5	992.027	597.371	15	cos_per_22_ph_15	.87739983591393899687	5.7832722228843795875	.00008847200000000000268
ENSDART00000029370	2077.35	2706.74	1553.75	2193.3	1025.52	1618.18	2624.95	2628.18	1280.75	137.403	605.823	1787.88	4	cos_per_22_ph_4	.82030363640053205465	4.5355825330089496461	.00054102000000000002086
ENSDART00000029380	1263.62	2378.59	2390.48	1365.08	1549.65	987.02	1188.79	1951.4	2087.95	629.042	622.48	1010.89	6	ct06-spike	.88687557973351505147	6.070338111586909946	.000060159999999999999988
ENSDART00000029413	1566.11	1834.59	2475.48	2262.34	1106.87	1274.03	1305.32	2848.28	2247.95	592.282	1148.91	1986.34	8	cos_per_20_ph_8	.86339099425369003615	5.4114774493302704172	.0001482800000000000101
ENSDART00000029552	165.141	209.386	348.78	190.855	179.48	209.711	178.395	221.611	239.437	100.322	158.524	160.34	7	ct07-spike	.81448150530232199529	4.4392678360493302847	.00062794999999999994919
ENSDART00000029555	1189.56	1150.05	1222.03	1024.01	606.75	835.495	1228.71	981.058	1240.93	975.422	382.356	440.002	6	ct06-box2	.89176308660242997739	6.2320139723363903173	.000048652000000000001072
ENSDART00000029763	574.867	539.395	1047.09	713.588	530.618	424.596	625.312	807.019	1271.39	1515.06	350.997	561.95	10	ct10-spike	.8104697166122180052	4.3752397250196697343	.00069384000000000003831
ENSDART00000030064	22.2891	71.6378	27.3942	41.8843	47.079	47.0858	18.3816	75.9909	37.5485	37.4309	23.8407	49.7823	4	ct04-spike	.82079701187696096909	4.5439377929585997862	.00053410999999999996674
ENSDART00000030131	973.252	1124.54	1055	838.136	531.821	570.598	1188.55	874.852	993.24	179.402	211	768.712	5	cos_per_22_ph_5	.84689912033002900937	5.0364120174040198918	.00025464999999999998271
ENSDART00000030205	1326.42	1592.47	2204.66	1361.36	1315.36	1491.02	2027.45	2317.47	1878.63	984.319	1192.45	2670.54	7	cos_per_20_ph_7	.84385887234401302237	4.9733305626457697812	.00027944999999999998921
ENSDART00000030260	4965.25	5333.7	6160.76	3363.5	3438.01	2291.18	2907	3542.34	5424.47	7132.96	2027.92	2112.34	6	cos_per_27_ph_6	.82579785150690299123	4.6304228148283304023	.00046778999999999999184
ENSDART00000030282	2310.35	2634.47	4347.54	3205.55	1469.44	2097.45	2337.91	2905.44	5039.6	6276.89	1175.25	942.255	10	ct10-spike	.83753168119973997463	4.8472953558314904043	.00033704999999999997982
ENSDART00000030470	5219.33	2825.95	2264.43	2488.19	485.25	1810.46	3669.29	3898.76	3216.09	988.097	574.775	3411.25	2	cos_per_24_ph_2	.82216767269354296133	4.5673140162970398137	.00051524999999999997451
ENSDART00000030566	1011.32	1224.68	1658.92	2196.94	554.294	407.103	833.711	1338.45	1671.58	521.179	444.96	188.495	9	cos_per_22_ph_9	.82815634034749896486	4.6723880889991198373	.00043880999999999998132
ENSDART00000030665	148.846	31.4319	52.3345	66.4059	737.121	90.2541	85.9924	43.9522	46.4725	67.6928	259.099	22.2289	16	ct16-spike	.84366945117311697988	4.9694562063170497623	.00028106000000000002292
ENSDART00000030674	1584.57	1146.23	480.937	2081.2	3150.51	3118.34	1969.15	2059.34	771.357	172.797	3447	2822.05	19	cos_per_26_ph_19	.85268721127325697307	5.1614113446198697233	.00021217999999999999122
ENSDART00000030838	1970.15	2902.87	4025.5	2368.48	1227.29	2450.7	1672.34	2535.74	3901.02	1804.23	1087.43	1638.86	7	ct07-spike	.9034965906894339982	6.6662122630389202271	.000027974999999999998972
ENSDART00000030890	1044.18	3205.26	2722.33	468.618	954.844	1456.41	4920.99	2455.27	2546.54	668.944	587.114	3036.23	5	cos_per_21_ph_5	.820263865370179035	4.5349103660069403077	.00054157999999999994773
ENSDART00000030921	1422.94	1110.82	3393.27	1499.93	804.53	1061.04	1713.43	1628.65	2788.79	2512.35	661.987	888.628	9	ct09-spike	.88007281269032500148	5.8610097821960502884	.000079610000000000005196
ENSDART00000031135	15915	19815.8	2843.79	11841.1	1734.82	14828	17595.8	13072.6	1913.09	1064.44	3077.49	8524.64	0	ct00-box1	.83965061350493397363	4.8887438600559098845	.00031681999999999999225
ENSDART00000031165	475.227	563.763	848.364	748.467	633.758	602.101	558.551	484.191	910.282	874.127	461.234	395.479	10	ct10-spike	.90757479569220000926	6.8351244938621800173	.000022702000000000000499
ENSDART00000031188	125.183	82.6651	57.1289	75.8813	275.76	76.9609	107.781	182.529	148.576	168.557	260.4	168.813	16	ct16-spike	.81294842209122497589	4.4145819172870304214	.00065253999999999995601
ENSDART00000031194	921.604	929.037	1598.28	1093.25	873.23	924.934	1056.21	1227.27	1512.62	472.176	610.713	635.531	7	ct07-spike	.82812179010992903461	4.6717676894946302824	.00043921999999999998586
ENSDART00000031418	381.953	369.884	366.183	197.008	184.932	73.0017	368.504	550.767	488.44	81.2689	108.32	265.859	4	ct04-sine	.88742195188252503968	6.087918212344200164	.000058777000000000003235
ENSDART00000031426	719.019	1075.73	400.824	391.783	566.011	325.51	764.482	653.74	409.704	185.838	397.661	365.987	2	ct02-spike	.85044421271504699877	5.1121809798385902113	.00022792999999999999459
ENSDART00000031597	470.343	371.902	819.226	433.612	512.391	420.386	339.402	419.252	950.497	841.455	515.1	275.012	9	ct09-spike	.84558964300921601875	5.009032727888009795	.00026511999999999998241
ENSDART00000031625	1516.08	1905.15	1636.56	1413.11	825.138	944.258	1384.18	1532.25	1420.87	545.179	693.491	979.366	5	cos_per_23_ph_5	.88690163683530498506	6.0711738054253796548	.000060093999999999997571
ENSDART00000031976	98.8863	65.5014	30.2585	75.3353	101.533	78.8387	95.7733	58.0903	51.5489	125.444	98.4522	89.4623	19	ct19-box2	.83237806291933602587	4.7494974244997099078	.00039040999999999999748
ENSDART00000032118	442.166	795.891	962.318	527.647	452.101	394.376	536.299	751.568	593.783	117.994	210.927	458.138	7	cos_per_21_ph_7	.87697037560052604199	5.7710038604526801009	.000089964999999999996686
ENSDART00000032151	3053.92	2663.67	2830.46	3527.77	8031.56	2009.33	2450.09	2129.17	2954.43	1449.64	4660.1	2443.16	16	ct16-spike	.85474274079755396816	5.2074446005644698943	.00019850000000000000023
ENSDART00000032161	2587.05	4514.82	3176.85	3167.19	1590.33	2141.8	4063.08	3441.24	2856.12	1221.91	1166.22	2167.56	5	cos_per_22_ph_5	.87425009916469598181	5.6946638518782899396	.000099883999999999994383
ENSDART00000032195	922.941	1353.93	208.883	1241.34	1169.09	1440.46	1143.69	1231.95	233.157	282.136	1276.69	1022.28	21	ct21-box2	.83715177482238700701	4.8399421321246096639	.00034078000000000000002
ENSDART00000032290	241.701	121.318	35.7679	342.609	388.985	263.278	244.531	262.511	33.3242	34.5787	294.855	460.545	19	cos_per_27_ph_19	.82636723119339905441	4.6404830293634500293	.00046065999999999999743
ENSDART00000032459	547.112	864.05	601.651	417.541	317.841	174.394	505.479	776.981	849.961	430.926	260.067	78.5783	5	cos_per_25_ph_5	.95463324085148704157	10.137597278897599651	.00000070111000000000000937
ENSDART00000032481	272.491	568.877	31.0866	13.3628	1028.75	36.3708	136.01	48.8337	149.408	91.9507	802.862	22.7438	16	ct16-spike	.8814809424622580547	5.9029475018403498865	.000075228999999999994117
ENSDART00000032603	826.695	1248.74	1686.15	1185.55	1041.46	1036.26	1216.46	1042.87	1587.87	1130.72	1010.52	402.039	8	ct08-rigid	.82767907547651298206	4.6638330754101398057	.00044455999999999998556
ENSDART00000032627	99.5837	38.9362	31.3819	69.3318	86.6742	107.257	84.1781	88.4003	36.235	49.3959	52.2218	56.4906	22	cos_per_28_ph_22	.83407986904439701537	4.7813328337705103266	.00037211999999999998117
ENSDART00000032739	36.9132	51.5342	53.1725	80.7446	39.1433	49.5053	49.1725	35.9238	33.3857	77.0098	24.2967	25.9652	12	ct12-spike	.84642552882324595398	5.0264728513457797021	.00025839999999999999254
ENSDART00000032852	247.718	147.163	93.8618	88.2567	506.789	215.967	294.006	144.409	115.186	198.22	339.57	132.795	16	ct16-spike	.81169564104447999853	4.394610685176639997	.00067316999999999995331
ENSDART00000032863	41.037	62.9036	43.025	24.9507	15.5028	19.4834	42.147	47.9127	11.758	28.032	11.2655	15.4118	4	ct04-rigid	.81989810807238394652	4.5287381432737996434	.00054675999999999997606
ENSDART00000032998	5297.33	10973.9	9442.6	4725.48	5419.41	5504.62	6581.54	8135.71	10011.7	8572.53	4985.59	6089.49	6	ct06-spike	.84615479653503500312	5.0208099653719298061	.00026056000000000001252
ENSDART00000033025	1410.48	1958.95	1596.01	1241.53	1236.63	1059.74	1779.04	1375.04	1735.13	440.576	633.51	718.313	4	ct04-box1	.82103919320023399653	4.5480504984154404013	.00053074000000000003119
ENSDART00000033294	661.134	848.655	902.619	629.611	382.612	514.775	629.947	618.463	660.735	242.457	237.171	291.637	5	ct05-box1	.81972772433117002677	4.5258686672219301528	.00054918000000000002404
ENSDART00000033332	63.8055	146.14	150.05	65.3638	45.465	59.7575	93.8644	79.4393	118.461	55.7289	52.297	92.3008	6	cos_per_22_ph_6	.81408824270512603061	4.432909349198429716	.00063418999999999997076
ENSDART00000033491	514.944	381.097	519.376	304.318	287.376	273.761	318.551	361.256	556.139	211.789	144.102	104.372	5	ct05-box1	.81112229888777498399	4.385530219700290111	.00068278000000000001884
ENSDART00000033610	388.449	163.892	52.3014	20.8055	1136.05	23.9856	266.432	92.907	188.11	78.9698	852.744	19.7245	16	ct16-spike	.93629487144299794465	8.4302353418155195897	.0000037102999999999998652
ENSDART00000033669	287.249	312.851	447.62	259.945	147.26	179.238	270.796	236.215	335.511	109.104	87.4774	100.824	5	ct05-box1	.83583451685769505346	4.8146266099524401838	.00035396000000000000596
ENSDART00000033738	2260.71	2304.19	2914.89	1918.31	2016.41	1742.86	2641.33	3039.48	4009.15	856.98	762.437	650.288	5	ct05-box1	.81430608584464703181	4.43642931737911006	.00063073000000000002761
ENSDART00000033819	335.882	329.357	383.592	281.769	1543.11	472.425	507.778	306.567	436.299	169.971	673.087	176.832	16	ct16-spike	.81541492896116996025	4.4544328938319601718	.00061333999999999997896
ENSDART00000033858	4048.69	4609.24	6708.67	4223.68	2672.84	3928.73	4770.55	4391.86	5278.38	3375.06	3056.15	4232.36	7	cos_per_21_ph_7	.81905651695854297945	4.514600246626059743	.00055880999999999997081
ENSDART00000033872	397.603	178.381	32.6595	33.1358	1657.66	41.7466	157.47	94.597	121.684	66.3561	630.092	55.4185	16	ct16-spike	.8562011780579239506	5.240655779445149598	.00018922000000000000776
ENSDART00000033904	564.088	689.224	1111.4	585.668	625.903	401.807	568.374	678.159	1040.1	1060.31	460.162	419.865	8	ct08-rigid	.86739259950112801434	5.5120609981262802535	.00012870000000000001122
ENSDART00000034004	276.606	331.655	406.901	367.486	381.165	263.332	232.918	351.963	539.62	296.119	179.083	200.603	11	cos_per_21_ph_11	.82269169947752596173	4.5763156699129297067	.00050818000000000000324
ENSDART00000034216	391.182	418.204	767.012	404.839	345.502	377.427	332.464	307.955	600.605	212.389	114.008	193.349	7	ct07-spike	.8268169688476160184	4.6484610283744300929	.00045509000000000000841
ENSDART00000034230	2405.56	1589.31	1470.77	887.555	881.079	1034.75	1443.48	1313.25	1601.8	518.066	538.194	977.18	3	ct03-box1	.8457945630826529948	5.0132962007381802749	.00026345999999999997459
ENSDART00000034242	555.068	481.002	1022.5	714.023	650.826	642.292	727.645	714.786	1187.16	818.088	401.491	369.208	9	ct09-spike	.86893968667058196775	5.5520886120484096438	.0001217000000000000037
ENSDART00000034252	11.9716	15.2469	22.6084	22.3412	19.712	70.3214	14.647	17.7307	14.3114	24.9784	32.3666	40.1372	19	ct19-spike	.86685455646074704994	5.4982925003564497857	.0001312100000000000126
ENSDART00000034332	1105.36	746.958	1473.07	292.882	117.881	479.054	1132.28	1419.38	1335.99	408.699	175.548	735.386	4	ct04-box1	.87896432070519603386	5.8284795049387598809	.00008319599999999999424
ENSDART00000034401	757.37	2665.91	1283.56	1094.85	162.652	193.593	1226.63	1731.55	1198.1	75.9528	188.941	183.693	5	cos_per_23_ph_5	.88001080510950802083	5.8591789494083199585	.000079807000000000003479
ENSDART00000034432	165.232	137.973	185.471	73.919	3459.43	52.7628	129.233	72.671	199.785	119.526	1125.64	100.82	16	ct16-spike	.86059405406045297315	5.3435746140283901795	.00016328999999999999006
ENSDART00000034512	1706.61	1840.98	1995.19	1335.28	1253.11	1014.53	1741.29	1694.54	2330.09	2279.79	818.345	970.258	5	cos_per_26_ph_5	.84858523387499096291	5.0721444753253397408	.00024164999999999999198
ENSDART00000034541	524.29	651.849	1120.04	652.074	610.867	490.169	466.303	679.689	927.072	881.18	419.174	245.364	8	ct08-rigid	.89759858926336899554	6.4391273886887701039	.0000372520000000000018
ENSDART00000034569	474.354	1216.23	1588.15	845.322	803.238	485.851	723.029	1205.55	1578.45	821.945	790.072	1307.67	7	ct07-spike	.82697905054604803343	4.6513431312994999445	.000453090000000000014
ENSDART00000034704	3610.71	3948.08	4427.04	2869.84	2502.98	2309.3	2717.83	3936.78	4961.86	1762.09	2253.4	2920.78	6	ct06-spike	.85510815622287394966	5.2157223204296299102	.0001961400000000000025
ENSDART00000034737	11.6948	20.0132	26.3678	32.3352	20.4954	162.346	10.6179	17.4756	21.8664	50.0291	89.8885	135.332	19	ct19-spike	.92677973466479601772	7.8026988370888004098	.0000073220000000000003696
ENSDART00000034802	217.643	229.964	361.025	293.408	198.368	219.293	285.039	308.207	455.198	350.423	148.316	111.75	8	ct08-rigid	.84051069215803198009	4.9057824299758099329	.00030888999999999997839
ENSDART00000034979	273.554	509.743	811.279	343.458	314.725	336.92	328.481	722.774	691.804	359.003	207.248	385.952	6	ct06-spike	.91431909040751202511	7.1391842143162396184	.000015724999999999999368
ENSDART00000035067	1570.27	2257.88	1407.2	1324.29	472.748	953.833	1615.94	1449.08	1148.35	258.288	277.587	624.273	4	cos_per_23_ph_4	.86285087501678703337	5.3982150072796200035	.00015108999999999999167
ENSDART00000035225	430.579	352.018	377.882	313.874	68.7502	73.4086	208.262	193.974	349.082	255.722	76.269	178.61	6	ct06-box2	.82036826021597897274	4.5366751639651203831	.00054011000000000000416
ENSDART00000035291	73.4628	63.5158	382.789	69.3905	206.417	114.85	76.4859	139.95	261.598	112.312	151.186	89.0756	8	ct08-spike	.86228204861783097623	5.3843259090180000115	.0001541000000000000052
ENSDART00000035469	469.695	328.937	867.814	527.322	460.422	285.224	450.907	588.137	908.789	595.299	359.037	722.947	9	ct09-spike	.81419888554065900088	4.4346964515782802962	.00063243000000000001472
ENSDART00000035558	1363.93	1595.29	2747.87	1235.16	1328.03	999.328	1010.53	1376.72	2172.1	923.611	912.766	765.77	7	ct07-spike	.92601694808716195073	7.7575174601854302026	.0000077013000000000002786
ENSDART00000035670	863.392	992.872	1518.56	1242.31	789.928	684.903	722.142	1464.89	1691.8	821.785	476.536	256.82	8	cos_per_23_ph_8	.912122608549233993	7.0365013270814298352	.00001777900000000000037
ENSDART00000035724	536.271	754.406	795.225	578.398	344.73	465.405	655.647	514.483	587.938	199.148	257.618	531.287	6	cos_per_21_ph_6	.83310710364408102624	4.7630812678464904408	.00038248999999999997845
ENSDART00000035992	931.508	1863.42	1362.62	656.176	373.954	975.295	1276.47	1971.6	1020.94	357.394	488.411	860.632	5	cos_per_22_ph_5	.94228722263525299674	8.9000119175218195267	.0000022873999999999999022
ENSDART00000036015	75.3709	52.0703	46.8854	49.8865	221.146	57.6789	68.6892	87.4642	57.3466	126.103	149.785	113.582	16	ct16-spike	.83076827827579202701	4.7197862357855600024	.00040834999999999997819
ENSDART00000036057	617.188	1388.73	1494.38	1147.77	401.726	406.892	973.682	948.156	750.684	440.333	713.987	1592.28	7	cos_per_20_ph_7	.84165803182714005182	4.9287087694714797337	.00029854000000000002497
ENSDART00000036075	1783.88	1274.01	2290.98	1205.49	1679.52	1017.38	1202.48	1445.25	2270.04	1423.23	1325.32	1390.73	8	ct08-spike	.86344730683517700864	5.4128643804773801662	.00014798999999999999763
ENSDART00000036110	108.206	137.273	28.5209	41.0953	107.924	121.644	60.6635	70.425	23.781	43.5102	118.471	164.994	21	cos_per_22_ph_21	.81751211856158101376	4.4888854909743498567	.00058146000000000000636
ENSDART00000036309	138.317	57.9904	55.4761	127.72	211.173	88.5581	101.376	107.853	216.915	255.9	201.024	82.7922	15	cos_per_20_ph_15	.8309465149100999648	4.7230568983915803827	.00040633999999999998896
ENSDART00000036318	1005.68	797.267	2466.91	1344.29	715.453	804.389	957.749	1471.18	2410.83	2009.9	688.265	952.827	9	ct09-spike	.91485782131724502353	7.1649466215134802738	.000015251000000000000179
ENSDART00000036348	40.2316	29.8357	126.453	81.3114	49.4773	54.7674	41.884	64.0971	83.4377	110.307	42.5889	70.5972	10	ct10-spike	.84963337349388801112	5.0946342209445498739	.0002338399999999999973
ENSDART00000036375	416.364	605.415	858.155	336.76	369.501	296.205	536.146	571.556	893.358	551.933	217.873	320.529	7	ct07-spike	.89790996115374699382	6.4506473836543998246	.000036708999999999997004
ENSDART00000036448	970.889	1145.19	1240.63	924.056	479.139	829.721	925.124	1002.62	1010.67	483.889	461.139	618.1	5	cos_per_23_ph_5	.87758645739010299192	5.7886222212356504002	.000087829000000000002229
ENSDART00000036531	1850.78	2374.28	3472.82	3238.43	1106.13	2653.62	2285.74	3873.15	3488.31	1717.64	1138.58	553.644	8	cos_per_22_ph_8	.8116916898458920171	4.3945479798673101612	.00067323999999999997127
ENSDART00000036541	105.342	220.735	196.291	131.484	56.037	89.4566	169.979	142.999	128.953	74.3869	82.1917	36.2815	6	cos_per_23_ph_6	.83083852373830102689	4.721074687884770249	.00040756000000000000777
ENSDART00000036567	888.309	670.279	1183.45	814.436	881.337	620.578	701.876	1115.58	1454.68	1108.79	479.332	418.716	8	ct08-rigid	.81849556013005297928	4.5052259702682704301	.00056696000000000003338
ENSDART00000036600	276.399	217.79	127.774	225.347	291.724	315.071	304.394	218.95	224.947	98.729	180.399	232.575	22	cos_per_28_ph_22	.87351557070279495232	5.6744459629753896124	.00010270000000000000266
ENSDART00000036649	1534.8	1335.65	602.951	801.133	363.376	660.068	1016.58	1356.34	550.904	91.7742	382.767	433.328	2	ct02-spike	.8910941985912459451	6.209284048781359644	.00005011499999999999706
ENSDART00000036656	43.7505	66.641	60.9237	49.8805	89.8558	258.218	22.88	17.7182	23.9665	40.3672	75.7014	183.136	19	ct19-spike	.94830467253018602136	9.4491731890434191854	.0000013325999999999999552
ENSDART00000036703	1159.32	853.428	878.554	1058.9	398.508	410.169	1162.43	1046.46	1199.73	629.158	474.455	725.142	6	ct06-box2	.81151907289036595561	4.3918102829936502829	.00067611999999999999791
ENSDART00000036801	37.3806	54.6698	28.0174	78.7555	95.9868	99.3536	64.2874	31.4902	30.941	28.5641	69.3414	72.5988	18	cos_per_28_ph_18	.88525011057724001251	6.0187369713168701324	.000064425999999999996075
ENSDART00000036854	777.226	1318.05	1456.66	1077.01	792.418	594.469	627.626	761.075	1530.18	1145.18	440.709	754.257	8	cos_per_24_ph_8	.85212868029840305173	5.1490561745102798596	.00021602000000000000867
ENSDART00000036886	35.9009	51.51	85.9922	42.4773	43.1141	51.6424	63.4088	38.5232	87.9179	47.4402	53.3252	61.6227	8	ct08-spike	.87187443996263502832	5.6298613658039302621	.00010922999999999999604
ENSDART00000036989	904.55	845.456	905.81	749.789	405.228	556.171	717.489	802.604	749.036	414.506	273.629	538.341	5	cos_per_23_ph_5	.86526725391365300055	5.4581209390725096142	.00013882999999999999724
ENSDART00000037287	39.2128	82.1122	71.1903	47.2754	16.8884	34.1336	29.2276	44.6701	54.6021	58.8506	37.0066	20.6966	6	cos_per_27_ph_6	.87729500740942700787	5.7802720420178497207	.000088833999999999996842
ENSDART00000037292	400.665	375.088	327.66	375.654	165.628	241.859	414.136	369.948	409.926	132.739	136.972	194.085	4	ct04-sine	.82664588007457195928	4.6454227342501601683	.00045720000000000000006
ENSDART00000037501	1275.6	1043.33	1169.77	801.925	578.975	580.023	809.061	872.744	1121.78	1015.07	554.985	634.363	4	cos_per_27_ph_4	.87270520291556796799	5.6523302697971002928	.0001058900000000000043
ENSDART00000037541	638.817	932.53	763.647	483.849	336.808	455.457	612.333	548.492	599.156	215.483	227.468	47.1381	5	ct05-box1	.82483637770791495836	4.6135356684389599025	.00048001000000000000698
ENSDART00000037698	648.684	825.317	1298.38	1687.45	591.631	703.649	850.339	1241.88	1313.91	980.221	723.861	457.579	10	cos_per_21_ph_10	.88587166210054102411	6.0383460156860095935	.000062768000000000006189
ENSDART00000037808	4935.45	4284.2	4375.57	4704.04	711.338	2899.41	4976.22	4268.38	4529.62	3722.07	2818.1	206.397	6	ct06-box2	.86575026904243601589	5.4702750895441996093	.00013647999999999999433
ENSDART00000037986	732.182	989.586	1026.48	813.909	674.583	643.176	657.375	724.388	894.95	705.517	498.1	610.211	7	cos_per_23_ph_7	.83572766407785104015	4.8125852491706400116	.00035503999999999998885
ENSDART00000037997	232.393	144.227	441.246	208.434	105.609	121.41	123.383	217.539	814.846	361.382	60.4417	163.373	9	ct09-spike	.88340999282864596243	5.9615502347098798808	.000069536999999999995082
ENSDART00000038015	318.108	463.425	601.219	436.348	279.091	219.981	314.983	370.145	559.787	398.584	184.056	357.796	8	cos_per_23_ph_8	.87703941169835497593	5.7729719569997897111	.000089722999999999994598
ENSDART00000038032	570.963	397.726	1196.27	573.721	323.29	480.386	333.311	468.268	1051.76	226.292	157.058	121.752	8	ct08-spike	.89219904913127701107	6.2469359091792302507	.000047716000000000001902
ENSDART00000038200	10757.5	13751.1	14866	10133.4	8685.06	10373.6	12718.9	15273.3	13497.8	5495.59	8986.14	11953.9	6	cos_per_21_ph_6	.91805590366776101963	7.3228419723121396245	.000012663000000000000563
ENSDART00000038310	404.694	854.539	431.972	526.391	358.942	475.879	549.857	1043.25	485.863	130.951	239.202	507.406	4	ct04-spike	.85287500867575705144	5.1655801171829400786	.00021090000000000000348
ENSDART00000038511	502.516	718.589	822.022	590.012	372.955	312.721	457.921	653.639	685.867	606.879	162.323	440.839	7	cos_per_23_ph_7	.92009876578569604888	7.4284109244349503243	.000011200999999999999992
ENSDART00000038524	108.311	70.1104	72.582	69.9012	1358.63	108.766	456.282	188.294	163.55	24.2606	499.559	31.6113	16	ct16-spike	.82183663056093203547	4.5616459095150103664	.0005197599999999999703
ENSDART00000038642	1681.1	2418.89	2818.86	2514.52	569.971	1627.51	1416.79	3368.08	3878.16	1373.18	1105.25	2144.98	8	cos_per_21_ph_8	.840309280395273972	4.9017810988883701029	.00031073000000000000143
ENSDART00000038657	4269.74	6735.38	4305.27	3919.96	2490.25	4245.58	6286.85	5435.38	5207.02	3543.14	2033.75	4989.19	4	cos_per_23_ph_4	.87692378685911398506	5.7696765727654604206	.000090128000000000001732
ENSDART00000038745	868.059	1148.4	2426.54	1343.85	1131.24	1338.02	1370.77	1338.48	2164.96	1335.19	1026.42	1348.32	8	ct08-spike	.9288367286244879617	7.9280009661338697313	.0000063721000000000003671
ENSDART00000038836	3472.37	4243.35	5345.41	5764.69	2855.3	4309.06	3605.43	5057.53	6756.91	5693.59	3952.29	4312.73	10	ct10-spike	.83582174730281699748	4.8143825594990001804	.00035408999999999999286
ENSDART00000038888	4264.41	5945.21	6638.25	6333.25	3948.14	4555.54	4532.46	5452.15	6682.76	3077.4	3625.72	4180.3	8	cos_per_21_ph_8	.82985896783703094748	4.7031729631694796367	.00041876000000000000896
ENSDART00000039017	35.9551	24.9356	19.1624	29.4621	101.422	49.2586	16.5705	15.9709	17.4459	101.117	42.3715	25.849	16	cos_per_21_ph_16	.81488240185812199634	4.4457684631882399273	.00062164000000000001808
ENSDART00000039055	310.65	534.794	699.129	381.188	322.101	309.442	453.817	601.871	708.99	720.275	149.188	95.1319	7	cos_per_24_ph_7	.87461671401146601212	5.7048168519982995761	.000098499999999999995437
ENSDART00000039109	296.911	278.093	450.835	331.122	263.179	309.235	286.793	251.27	481.91	228.98	258.042	225.391	8	ct08-spike	.92227229458122494954	7.5450788993562598606	.0000097946999999999995819
ENSDART00000039165	678.193	779.177	1328.56	815.154	965.199	829.43	886.085	959.949	1310.8	1064.46	648.209	948.393	9	ct09-spike	.84488645981385901429	4.9944615430716998716	.00027086999999999998665
ENSDART00000039350	53.5013	29.9743	98.5447	38.0982	55.4649	32.8343	54.6879	38.7113	112.994	63.1346	40.9839	57.8546	8	ct08-spike	.90276790874915902041	6.637100443657909743	.000029011000000000000573
ENSDART00000039443	2905.94	2947.41	4418.51	4670.78	3563.03	3278.76	2054.62	2288.1	3916.61	5905.35	2810.08	1411.33	11	ct11-spike	.84116739342035595772	4.9188769732830301962	.00030292999999999997447
ENSDART00000039466	1774.68	3363.53	4514.78	2297.2	2374.22	2340.18	4024.15	4329.62	3130.69	2073.92	1523.33	1990.21	7	cos_per_21_ph_7	.85917331461139101467	5.3098024348578896081	.00017134999999999999082
ENSDART00000039485	1180.58	2545.11	3531.95	2112.63	1574.87	1462.48	1883.73	2338.66	2562.71	2001.25	782.48	1343.21	8	cos_per_22_ph_8	.91129157512906400207	6.9986044501616495594	.000018609000000000000893
ENSDART00000039495	770.813	738.765	1463.38	822.516	668.489	616.633	881.052	1166.74	1602.37	1196.64	548.999	974.286	9	ct09-spike	.83797895940619604449	4.8559827789304703671	.00033270000000000000961
ENSDART00000039525	525.556	981.299	1634.56	856.073	851.551	669.504	781.323	891.426	1194.11	841.889	333.279	764.6	7	ct07-spike	.83946175547865098387	4.8850192443151296828	.00031858999999999999733
ENSDART00000039536	241.129	406.599	341.135	291.869	156.804	148.544	282.375	283.034	352.509	52.7725	47.075	119.789	6	cos_per_23_ph_6	.86176566384342601079	5.371786114091349873	.00015686000000000001266
ENSDART00000039597	778.666	1032.2	644.994	577.316	509.696	383.472	579.833	597.109	705.965	812.227	317.239	340.916	4	cos_per_27_ph_4	.8182174559990420537	4.5005930026438099034	.00057103000000000004015
ENSDART00000039598	4309.49	5028.1	7261.93	6391.94	3992.2	5703.2	7102.54	6548.69	6412.36	3511.66	2789.37	6423.73	8	cos_per_20_ph_8	.82751451085963700915	4.6608907010481601674	.00044654999999999998514
ENSDART00000039629	418.159	477.183	350.744	277.946	325.098	357.8	434.548	471.376	212.109	309.215	172.684	445.71	1	ct01-box1	.84231003885042798895	4.9418390219133598862	.00029279000000000002073
ENSDART00000039657	151.149	66.985	82.3403	79.1525	234.825	46.3738	67.6943	97.3017	102.921	235.756	441.977	135.181	15	ct15-spike	.83018446148229396719	4.7091058792698996527	.00041500999999999999912
ENSDART00000039667	292.261	224.663	587.851	573.815	356.925	333.792	272.491	247.27	869.538	837.579	349.63	510.596	10	ct10-spike	.87137699195164997068	5.6165045455618400894	.00011126999999999999684
ENSDART00000039832	813.615	736.911	748.898	604.188	534.405	580.867	643.763	742.822	987.345	790.863	517.782	484.717	3	cos_per_28_ph_3	.89219947612607997112	6.2469505659970101519	.00004771499999999999971
ENSDART00000039865	1819.9	1522.27	1632.06	1087.93	872.742	801.785	975.709	1311.3	1440.22	1338.05	352.108	892.115	4	cos_per_26_ph_4	.81198356489467804487	4.3991847870042599666	.00066837999999999999409
ENSDART00000039911	50.171	85.5132	91.9341	78.6643	79.5853	51.2148	87.7106	90.6916	69.694	50.3783	51.8283	95.1992	8	cos_per_20_ph_8	.83208867267105701693	4.7441276689930198529	.0003935899999999999772
ENSDART00000039913	70.6324	107.943	117.04	106.485	68.3819	74.4791	100.379	116.46	85.7135	89.4894	39.0124	101.846	7	cos_per_21_ph_7	.8514407260799999877	5.1339262908537204311	.00022081999999999998982
ENSDART00000040032	947.585	1165.02	1511.62	884.258	506.524	636.601	751.393	816.256	1121.66	1299.47	404.063	436.202	6	cos_per_26_ph_6	.85796517068075695001	5.2814533342258895843	.00017845000000000000077
ENSDART00000040042	477.777	458.106	39.7398	83.4046	1952.86	52.0375	302.523	113.41	237.333	358.043	1062.35	23.4016	16	ct16-spike	.89723119278900498319	6.4255983836759495986	.000037901000000000001854
ENSDART00000040114	8242.72	6192.36	5999.57	4703.54	1813.97	3418.34	4171.55	5515.15	5003.05	3166.3	1607.57	1105.59	3	cos_per_26_ph_3	.84371292573709399942	4.9703448502456897273	.00028068999999999999766
ENSDART00000040129	620.384	661.182	1159.54	468.996	438.462	486.344	560.344	726.364	965.015	573.48	294.098	777.733	7	ct07-spike	.85990673112657101118	5.327177049980350354	.00016714999999999999715
ENSDART00000040184	131.087	260.036	136.936	88.5172	68.4227	103.581	157.53	170.758	100.641	102.862	84.0726	56.4808	3	ct03-spike	.86112731774759698755	5.3563742419710402842	.00016033999999999999967
ENSDART00000040280	142.218	119.991	397.566	172.825	152.23	144.21	130.548	207.855	414.855	130.921	76.6986	51.227	8	ct08-spike	.93486828864235804737	8.3277653622131992961	.0000041347000000000004097
ENSDART00000040422	17905.4	21926.1	21330.2	14438.1	12651	16451.4	18904	18946.8	18922.4	13905.2	16067.4	15911	5	cos_per_22_ph_5	.88659274927393505461	6.0612847033582601952	.000060885999999999999475
ENSDART00000040443	171.776	212.727	153.435	331.831	135.581	282.632	139.607	168.314	174.185	521.226	264.566	245.809	12	ct12-spike	.82067556381666295628	4.5418781997049704202	.00053580000000000001324
ENSDART00000040534	325.46	339.952	324.441	487.182	997.674	578.388	242.842	188.717	292.583	359.61	670.694	369.027	17	ct17-spike	.87563439696584799421	5.7332196276960800674	.000094734999999999993368
ENSDART00000040601	34.3125	18.7567	25.5312	42.7243	20.4819	25.3232	17.0784	20.9035	27.3156	54.236	38.7758	26.6657	13	ct13-spike	.81513139317677696383	4.4498154667890297276	.00061775000000000002652
ENSDART00000040627	149.138	96.4487	58.4041	85.3221	62.5208	76.7689	129.315	122.032	125.308	32.1325	63.9409	76.7722	0	cos_per_26_ph_0	.82623706109768602079	4.6381791452220504368	.00046228000000000002596
ENSDART00000040701	1050.53	1421.1	524.896	906.4	837.031	1122.87	1366.49	1599.72	342.318	266.145	733.967	1228.75	0	ct00-box1	.8499607213863900057	5.1017023751317100988	.00023143999999999999317
ENSDART00000040704	375.029	619.38	688.046	584.824	593.216	447.863	337.463	457.621	635.9	586.813	479.6	522.838	10	cos_per_26_ph_10	.81807717142427105461	4.4982596156545202604	.00057308999999999994928
ENSDART00000040723	581.221	1004.04	1526.24	631.087	463.347	503.125	814.527	954.914	1212.82	929.401	389.174	1003.16	7	ct07-spike	.81625636203478502129	4.468192235932700207	.00060039000000000001655
ENSDART00000040761	89.2629	69.6483	113.293	34.3932	649.537	117.702	49.1974	46.9269	97.1066	135.108	2586.04	34.6498	16	ct16-spike	.82253870500506298669	4.57368383461549044	.00051024000000000002079
ENSDART00000040793	1101.61	1320.48	1693.94	1051.83	4629.15	753.388	898.685	934.185	1062.92	706.195	2224.89	362.537	16	ct16-spike	.84229825116175804922	4.9416009784576697683	.00029289000000000002316
ENSDART00000041054	666.63	435.17	214.453	494.349	6489.77	226.934	982.503	547.969	422.546	119.696	1940.97	185.218	16	ct16-spike	.82783316496538994489	4.6665916199082797533	.00044268999999999997805
ENSDART00000041070	1248.87	1624.71	2120.84	1557.63	806.069	1260.58	1292.58	1573.37	1602.78	1117.07	549.572	1220.31	7	cos_per_22_ph_7	.87708587060988296713	5.7742972901851903345	.000089561000000000005297
ENSDART00000041192	380.387	423.556	551.487	393.274	392.953	301.452	528.902	717.887	675.122	430.807	233.041	327.193	8	cos_per_22_ph_8	.83615280551104298468	4.8207181018395601768	.00035073999999999999275
ENSDART00000041378	335.738	223.189	169.745	215.181	107.685	151.319	333.721	325.766	346.065	82.7368	104.071	128.957	0	cos_per_27_ph_0	.84225383965942801634	4.9407043409019095748	.00029327999999999998385
ENSDART00000041394	293.69	412.642	748.798	651.786	289.843	279.407	319.056	469.343	1073.06	1035.56	373.259	480.162	10	ct10-spike	.89330326507310597872	6.2851155234795399451	.00004540899999999999841
ENSDART00000041420	1769.37	1666.09	2488.73	1538.05	1423.31	1649.26	2063.98	2225.95	3071.78	1959.18	1401.49	1691.48	7	ct07-spike	.84774067661241503391	5.0541783674697402517	.00024810000000000001323
ENSDART00000041501	412.535	397.19	569.066	419.672	261.1	277.98	263.572	305.701	496.691	379.48	168.53	180.316	7	ct07-rigid	.82754217736784396742	4.6613851045864702627	.00044621999999999999338
ENSDART00000041515	1208.73	694.6	997.276	829.802	283.675	470.826	855.937	1105.65	1136.16	382.789	207.688	591.635	4	ct04-sine	.82270721760010701029	4.5765827868885597951	.00050796999999999994935
ENSDART00000041531	2511.31	2936.25	4926.47	2392.19	1424.43	1535.72	1969.83	2223.62	3216.06	4378.61	900.03	1033.02	7	cos_per_25_ph_7	.81581118529855300991	4.4609020302249700052	.00060722000000000000367
ENSDART00000041585	36.0872	18.5889	109.459	61.7554	29.7364	27.4955	28.3035	35.7438	64.0207	62.2212	34.5996	38.4339	9	ct09-spike	.87910129844472495453	5.8324766245077004356	.000082745999999999996855
ENSDART00000041597	627.581	732.062	829.538	877.042	656.439	341.175	603.899	650.132	1116.6	748.952	765.742	215.719	9	ct09-rigid	.87758683935336700976	5.7886331829487396305	.000087828000000000000036
ENSDART00000041615	545.628	1005.93	1214.53	1002.99	712.828	660.589	767.578	935.108	922.333	540.883	493.183	662.424	8	cos_per_21_ph_8	.89479380729205204581	6.3375491329302899857	.000042434000000000000636
ENSDART00000041677	349.448	340.492	510.724	209.162	1095.11	931.453	400.864	383.062	604.85	278.709	1183.75	631.796	17	ct17-spike	.91376283041910200122	7.1128259782160903058	.000016226999999999998966
ENSDART00000041700	2301.4	2251.06	2541.82	1572.01	1410.83	1279.77	1336	1641.81	2733.48	1731.27	637.277	1006.65	5	cos_per_26_ph_5	.82657960491252102653	4.6442468750630503393	.00045802000000000000915
ENSDART00000041833	2826.89	1609.41	1162.89	1709.85	968.592	2457.19	2561.04	2574.32	1510.5	154.474	1374.74	1550.54	0	cos_per_25_ph_0	.81967575250781998797	4.5249941258998500615	.00054991999999999996614
ENSDART00000041895	721.265	1499.85	1994.97	855.935	868.713	640.908	1102.55	1005.99	1695.28	1383.11	398.771	634.78	7	ct07-rigid	.85480706232925596222	5.2088995806695104207	.00019808999999999999568
ENSDART00000041993	3625.71	6139.2	6727.05	4963.07	2527.5	4315.67	5906.56	6689.93	7031.21	4520.26	3864.94	4274.07	7	cos_per_22_ph_7	.91681951435807695905	7.2607671904629995652	.000013618999999999999541
ENSDART00000041998	4002.7	4165.32	1794.85	2452.11	2371.99	2195.15	3435.92	3389.97	1650.29	285.625	1326.85	1991.42	2	ct02-spike	.85351413408664400517	5.1798228246665498631	.00020659000000000001256
ENSDART00000042340	51.0752	61.8669	58.3492	75.2926	148.683	52.8045	52.543	44.4217	96.7527	126.669	75.0919	29.1548	15	cos_per_20_ph_15	.83647090722860195644	4.8268221893658695976	.00034754000000000002338
ENSDART00000042367	183.018	237.047	330.374	178.385	104.143	136.474	150.052	149.633	300.584	241.729	176.737	202.663	9	ct09-spike	.84156831277258203894	4.9269077910951697419	.0002993399999999999902
ENSDART00000042496	166.747	219.627	300.168	162.605	169.845	236.799	203.625	149.599	290.13	230.964	177.142	199.873	8	ct08-spike	.82227760924554504918	4.5691995109363903182	.0005137600000000000413
ENSDART00000042512	4576.96	5717.51	5489.94	5207.16	2552.06	3449.32	4369.93	4411.89	4433.11	2682.03	2488.31	5306.05	6	cos_per_21_ph_6	.81290123999438201885	4.4138265062493804436	.0006533100000000000452
ENSDART00000042521	115.208	175.826	156.318	235.497	161.68	331.821	105.576	147.243	85.5333	106.886	287.123	301.062	19	ct19-spike	.81714544573362202229	4.4828233849506000652	.00058693999999999998778
ENSDART00000042588	3479.6	4235.91	4196.69	3074.62	1863.81	2493.56	3569.22	3075.65	4553.31	1739.07	2141.38	3279.52	6	cos_per_22_ph_6	.81905405083764204477	4.5145589488506097098	.00055884999999999995009
ENSDART00000042595	744.397	968.582	1374.47	961.676	870.27	645.241	915.585	1038.61	1276.04	1056.8	452.224	956.784	9	cos_per_21_ph_9	.85746183061744596365	5.2697408605541999904	.00018147000000000000912
ENSDART00000042672	898.744	697.762	591.928	549.964	384.699	439.359	694.936	624.851	553.408	209.302	142.61	311.113	3	ct03-box1	.83693717565072500708	4.8357988452190596718	.00034289999999999998649
ENSDART00000042716	1263.27	2634.09	2878.86	1171.93	927.454	1520.12	870.059	1419.29	3261.75	991.386	854.258	361.548	7	ct07-spike	.89508342159206100153	6.3478592377353200149	.000041873999999999999221
ENSDART00000042755	135.931	76.8757	81.463	56.7058	297.721	119.408	32.284	31.4832	70.473	184.801	231.917	223.95	17	ct17-spike	.814966588741358966	4.4471359816151201372	.00062032999999999999165
ENSDART00000042767	43.0867	38.5905	165.108	50.549	58.3381	57.3769	42.8267	56.5938	93.2543	79.0976	34.0579	68.2616	9	ct09-spike	.83752911710786703825	4.8472456481378403126	.00033707000000000002368
ENSDART00000042770	141.478	113.236	21.2238	174.248	141.807	125.063	161.306	207.234	52.1527	115.919	171.193	220.235	20	ct20-box2	.81075932320761301408	4.3798006147421295609	.00068891000000000004316
ENSDART00000042820	8592.65	8881.88	11155.1	10888.7	3753.15	8412.74	10589.8	9929.6	10622.9	10534.1	6240.57	12643.7	4	ct04-box2	.84348070231876404179	4.9656020063313803803	.0002826600000000000076
ENSDART00000042850	27.019	20.1823	28.8622	30.6015	35.5415	39.4537	28.0515	18.5543	31.1797	28.0143	55.3932	62.4487	18	ct18-spike	.81244178453259996431	4.406483745536980301	.00066082000000000000548
ENSDART00000043002	2410.6	3184.31	3378.27	2985.12	2809.6	2086.03	2433.89	3261.47	3379.12	2124.64	1644.36	2899.59	8	cos_per_21_ph_8	.8599637539769500183	5.3285332035984902532	.00016683000000000000021
ENSDART00000043052	43.3745	40.0103	34.9634	40.409	84.9359	85.5764	21.9669	36.0873	40.9664	62.2513	71.3736	76.9254	18	ct18-spike	.89769964336817698047	6.4428606875468199533	.000037074999999999999937
ENSDART00000043148	119.772	205.68	50.738	53.9455	106.524	71.029	21.7328	145.073	73.0963	40.9429	43.3944	26.3575	4	ct04-spike	.8131620777712920134	4.4180058723279396204	.00064906999999999996382
ENSDART00000043251	648.939	1669.89	2228.61	1600.36	488.859	788.718	802.283	1523.86	1813.71	292.865	363.313	1131.36	8	cos_per_21_ph_8	.89728635535870104878	6.4276253080135701268	.000037802999999999997033
ENSDART00000043256	33.7484	38.4463	20.3465	25.7187	49.7853	44.6442	36.0663	32.2481	12.7875	41.1319	53.9172	45.4413	19	cos_per_22_ph_19	.83454431999442102441	4.7900986887012395599	.00036724000000000001434
ENSDART00000043317	125.986	111.205	67.0271	59.9987	54.4133	55.0183	90.4225	79.9671	116.696	90.6813	33.1693	53.6079	1	cos_per_28_ph_1	.86844960274938598488	5.5393377321722896411	.00012388000000000001333
ENSDART00000043507	2869.65	1888.78	1827.22	958.202	163.184	1597.91	2293.34	3885.8	2508.36	381.951	278.028	1914.15	3	cos_per_24_ph_3	.88254206831488601903	5.9350160347145202167	.000072053999999999998258
ENSDART00000043546	886.434	709.215	1141.45	446.808	531.318	347.274	471.458	672.095	843.632	642.236	225.773	82.3499	5	cos_per_26_ph_5	.81062889721756803407	4.3777454324564901711	.00069112999999999997786
ENSDART00000043554	3678.52	2327.49	2453.75	2003.24	1845.09	2572.57	3349.84	2386.5	2467.7	904.858	2480.5	2637.72	0	ct00-rigid	.85094144047094399941	5.1230061199230103597	.00022435999999999999997
ENSDART00000043638	488.049	418.227	833.217	708.285	415.481	545.497	488.075	529.862	1000.13	385.271	327.294	552.09	9	ct09-spike	.85170129499691704655	5.1396454758309095823	.0002189899999999999887
ENSDART00000043711	205.634	237.922	345.132	239.606	1244.07	313.869	427.343	210.596	223.164	114.931	548.341	112.242	16	ct16-spike	.8273047385301020018	4.6571455480075698574	.00044911000000000001484
ENSDART00000043756	305.53	88.1336	116.07	86.6089	204.704	424.448	182.069	87.8252	95.888	166.069	301.429	122.599	19	cos_per_20_ph_19	.82897176820917395368	4.6870796798061595823	.00042912000000000001141
ENSDART00000043812	338.488	464.381	613.698	490.76	299.751	308.641	292.425	411.481	460.194	227.275	184.698	172.573	8	cos_per_22_ph_8	.82826121697931098797	4.6742723394070697651	.00043754999999999998322
ENSDART00000043823	130.959	166.132	668.168	145.961	151.384	159.998	199.842	132.123	368.829	293.604	198.189	149.113	8	ct08-spike	.86650598565660497119	5.4894138920744603993	.00013285000000000000368
ENSDART00000043924	163.782	329.125	246.357	309.185	213.877	170.314	200.345	309.787	274.402	269.734	220.279	110.047	8	ct08-box1	.85561579831654199779	5.2272699195002703121	.00019289999999999999964
ENSDART00000043932	433.517	119.147	63.2637	65.4228	868.659	223.861	108.681	113.405	110.805	46.485	676.417	36.1748	16	ct16-spike	.90831220541057300366	6.8668043368050399877	.000021838999999999998767
ENSDART00000043938	438.606	333.482	536.71	751.668	420.909	350.062	478.307	502.141	644.923	442.151	347.16	341.549	11	cos_per_20_ph_11	.8501255285636230008	5.1052689705324096892	.00023023999999999999111
ENSDART00000043960	229.107	1207.87	1196.13	1060.81	431.206	399.12	419.671	1109.12	1386.2	533.373	350.81	384.466	8	cos_per_22_ph_8	.92977990778897900981	7.987218570941950091	.0000059704999999999998415
ENSDART00000043961	1178.02	162.917	43.6772	40.737	10648.7	52.8257	106.982	111.485	55.1552	57.8511	4069.44	35.1936	16	ct16-spike	.88902438498894298391	6.1401801175989598747	.000054864000000000001905
ENSDART00000044214	4201.1	2481.07	1186.97	3169.82	3097.74	4646.03	4037.43	3031.8	693.858	441.19	2603.44	2696.89	22	cos_per_27_ph_22	.84643262275704300723	5.0266214191446003667	.00025834000000000002361
ENSDART00000044328	1310.66	2770.93	5640.24	2261.4	569.655	1275.83	1707.92	5568.99	3933.63	939.218	1213.03	1897.72	8	cos_per_21_ph_8	.90583455848850802372	6.7617718495735603668	.000024847000000000001138
ENSDART00000044426	477.177	810.372	155.984	512.195	282.137	363.387	588.829	821.728	202.618	22.9941	96.9083	197.072	3	ct03-spike	.86776799565281503845	5.5217135574872804327	.00012697000000000001254
ENSDART00000044443	271.729	207.199	58.0238	328.788	432.896	1092.39	255.116	314.302	120.758	87.1186	802.279	563.713	18	ct18-spike	.82734157835786803492	4.6578028174050603027	.0004486599999999999768
ENSDART00000044471	26.6864	51.5549	64.893	106.673	28.0296	27.0473	69.8497	26.1257	57.3598	82.3345	43.1706	27.0407	11	ct11-spike	.84400763750110896488	4.976377881695619898	.00027819999999999998593
ENSDART00000044526	852.25	1267.03	338.294	625.068	597.137	535.552	1118.65	1036.58	696.572	198.318	451.526	769.413	2	ct02-spike	.83469871557571795329	4.7930201268297700778	.00036562999999999998063
ENSDART00000044619	43.5528	45.2162	160.738	109.431	38.3619	59.5577	56.0169	52.1089	96.6764	85.781	78.4052	65.544	9	ct09-spike	.83687869484452803714	4.8346710427862600312	.00034348000000000001143
ENSDART00000044683	4408.95	6324.48	10009.9	10599.9	2970.91	5898.24	6203.32	8098.1	10599.3	8941.46	3491.76	570.602	9	cos_per_23_ph_9	.86975106973065596794	5.5733458511781002187	.00011814000000000000391
ENSDART00000044708	2213.18	2115.47	1211.22	1264.68	1317.74	2030.58	2846.35	1658.53	1436.55	1161.41	796.689	929.96	0	cos_per_26_ph_0	.82363813605313795918	4.5926650644910500532	.00049560000000000001188
ENSDART00000044986	166.168	333.13	363.361	335.188	109.761	116.487	268.19	546.76	605.208	37.7116	202.884	144.796	8	cos_per_21_ph_8	.82989438257464698268	4.7038177341851996616	.00041835000000000000442
ENSDART00000044987	2504.96	1333.97	1434.22	1165.91	953.826	1165.05	2011.28	1857.04	1708.08	532.759	553.112	470.544	0	cos_per_27_ph_0	.85493930357855596469	5.2118937348200695681	.00019723000000000000731
ENSDART00000045070	36.4958	70.4783	29.5373	40.2627	28.2682	35.5702	21.4729	63.3833	16.2548	17.3712	22.1186	27.5249	4	ct04-spike	.89651144884587996575	6.3992923646874801946	.00003919799999999999977
ENSDART00000045186	842.005	630.738	346.242	452.924	473.344	503.428	698.192	470.153	224.131	271.67	175.315	424.158	1	ct01-spike	.82421184361173105426	4.6026336645327399211	.00048808999999999999738
ENSDART00000045227	720.022	733.832	306.527	664.226	679.276	689.287	613.48	689.928	213.767	381.485	433.842	597.173	21	ct21-box2	.82691752553418795824	4.6502486748582603227	.00045384999999999999995
ENSDART00000045231	66.7363	21.1299	43.0617	94.208	496.618	80.9576	31.4757	104.786	112.787	34.1876	403.112	39.3257	16	ct16-spike	.97226944384792102216	13.146926172105100505	.000000061635999999999996847
ENSDART00000045232	4203.34	2796.17	204.312	842.831	783.172	563.23	1743.12	1484.76	124.366	113.872	242.242	264.858	2	ct02-spike	.84058232529214704787	4.9072071932837699748	.00030822999999999999487
ENSDART00000045273	1007.28	1658.05	1927.26	1290.08	1382.3	1015.3	1516.68	1507.19	2221.68	986.114	825.457	1123.54	7	ct07-spike	.8722741355979050093	5.6406460798387696443	.00010760999999999999461
ENSDART00000045290	30.5464	32.8855	36.1453	57.1816	25.7548	39.8949	34.4993	16.5451	30.8063	73.5775	45.0769	46.259	12	ct12-spike	.81422606390486595984	4.4351356555586098906	.00063199999999999996632
ENSDART00000045374	96.2581	137.493	91.8765	77.5606	77.6405	75.2021	136.222	120.766	119.317	74.4592	56.9894	90.5457	4	cos_per_23_ph_4	.88132261128917199766	5.8981971372447299373	.0000757119999999999961
ENSDART00000045391	308.971	450.021	94.5866	288.342	235.962	155.431	244.621	344.128	171.399	143.484	148.465	108.404	3	ct03-spike	.83472378616475695345	4.793494858290410221	.00036537000000000000683
ENSDART00000045397	41.2467	42.2432	45.1151	54.4105	63.369	42.6521	20.9647	30.3076	48.1235	55.1718	122.135	42.2207	15	ct15-spike	.81784746153965404147	4.4944440360893400666	.00057647999999999998289
ENSDART00000045408	4562.97	4319.8	6414.46	3566.28	2474.63	5327.32	5525.7	4691.77	4949.72	2694.91	1114.77	6008.58	3	ct03-box2	.87162680743967502206	5.6232032239544400554	.00011024000000000000162
ENSDART00000045500	915.7	1215.24	224.304	773.379	474.643	465.983	770.664	1009.2	191.599	237.921	263.493	416.171	2	ct02-spike	.84830186734355694789	5.066101123921799676	.00024379999999999999003
ENSDART00000045518	646.752	668.221	1283.41	867.838	750.585	607.701	580.566	618.643	902.254	861.949	435.776	390.68	9	ct09-spike	.83479074419629695214	4.7947632435971199172	.00036466999999999998982
ENSDART00000045533	285.277	541.468	81.2436	328.513	346.779	245.273	394.186	547.205	136.505	60.4275	154.972	173.086	3	ct03-spike	.83954048459576002816	4.8865711928024602173	.00031785000000000000102
ENSDART00000045588	2332.87	3525.06	4075.19	5007.6	2393.24	2922.4	4216.52	6384.16	5131.64	864.928	2734.38	5042.43	8	cos_per_20_ph_8	.83852178987789505182	4.8665702683254101757	.00032748000000000000199
ENSDART00000045603	2009.78	1260.87	1148.31	1009.34	1279.55	990.224	1955.14	837.668	1400.71	1385.27	611.791	843.695	0	ct00-spike	.82915291450297901044	4.6903563303975204235	.0004269899999999999759
ENSDART00000045697	2625.16	4127.01	4289.73	2842.41	3362.57	2190.61	2815.6	3030.12	4124.05	3502.61	2042.83	1591.16	8	ct08-rigid	.86546584939531601144	5.4631108611909899864	.00013786000000000001161
ENSDART00000045752	287.235	302.251	54.1453	294.612	370.158	247.468	300.212	371.539	56.4608	118.7	257.252	198.132	21	ct21-box2	.8340214998528110435	4.7802335660187997846	.00037272999999999999058
ENSDART00000045763	4202.75	4833.22	5575.64	2375.52	1744.59	2411.36	5502.18	5108.91	4779.67	2687.98	807.168	2437.68	4	ct04-sine	.95030984592911804665	9.6533544008681602122	.00000109710000000000005
ENSDART00000045861	3777.12	1615.14	1148.42	1382.77	640.838	2784.92	3381.06	1151.72	959.813	195.719	826.125	2302.2	23	ct23-spike	.91269149036495000882	7.0627405231882702807	.000017227999999999998361
ENSDART00000045921	1410.75	742.753	416.46	492.951	224.329	378.596	1156.98	296.126	422.462	42.6994	129.342	177.165	1	ct01-spike	.90852116075524402827	6.8758474810515801678	.000021599000000000001065
ENSDART00000046076	413.822	476.135	676.625	460.16	379.534	392.209	468.327	421.427	678.095	175.977	230.591	341.669	7	ct07-spike	.82190739292585901499	4.5628563050352504149	.00051878999999999998467
ENSDART00000046091	1074.22	1454.42	235.806	1194.84	329.695	566.064	1116.29	1786.7	305.623	96.5966	440.102	711.28	3	ct03-spike	.83332346581326299795	4.7671282086645998533	.00038016999999999998711
ENSDART00000046166	514.078	664.528	777.655	519.583	307.219	534.569	702.957	656.687	984.891	366.07	268.698	359.994	5	ct05-box1	.83942064056751897194	4.884209180342070411	.0003189700000000000174
ENSDART00000046182	896.189	791.127	1622.94	770.899	958.757	309.125	648.489	755.106	1366.9	964.465	387.387	580.551	9	ct09-spike	.84561495781571405228	5.0095589949526102558	.00026490999999999998273
ENSDART00000046218	78.3958	72.0254	31.0716	59.3148	146.118	41.5972	46.8646	52.7539	34.2212	126.499	130.786	20.2971	15	ct15-spike	.84776590822396002967	5.0547131252969004223	.00024790000000000000837
ENSDART00000046249	62.0036	37.5157	66.3136	91.0224	60.603	42.5657	38.7643	54.2648	63.5911	119.893	40.78	75.5188	11	ct11-spike	.84975449084165100011	5.0972469345948097086	.00023294999999999999735
ENSDART00000046297	11500.1	7257.22	1813.81	9314.62	5257.42	12225.6	12644.7	4996.44	2895.93	615.747	5268.77	12357.2	22	ct22-spike	.8503079656450179824	5.1092234052364799979	.00022891000000000000215
ENSDART00000046423	116.043	99.5219	60.7144	51.7033	170.786	142.765	72.6214	56.1413	88.4374	149.796	88.3557	64.3355	17	cos_per_20_ph_17	.81913760451661099538	4.5159585662999504052	.00055763999999999998031
ENSDART00000046431	2030.72	1945.53	3767.63	2745.36	1067.83	1521.33	2002.14	3067.7	3322.03	2072.31	1039.73	2155.95	8	cos_per_21_ph_8	.88795445218010604638	6.1051681613189900943	.000057454000000000002518
ENSDART00000046510	2807.71	2405.06	1568.18	1914.94	370.266	1823.33	2658.58	2633.67	2792.49	644.18	749.773	2090.43	3	cos_per_24_ph_3	.84042098685570398864	4.9039994520964302893	.00030970999999999998748
ENSDART00000046530	20.3863	13.6482	22.0245	26.0778	84.4724	17.1396	19.8744	27.417	16.4002	60.2662	50.9091	36.1016	15	ct15-spike	.83402899411646502781	4.7803746760723502263	.00037264999999999997779
ENSDART00000046576	559.746	253.861	65.328	88.0644	2414.36	62.6762	791.888	152.081	102.193	163.491	1429.68	161.685	16	ct16-spike	.90706927282592497708	6.8136144184488500741	.000023309999999999998744
ENSDART00000046933	1345.83	1172.42	3322.18	2413.68	2978.97	1054.82	1474.48	2447.11	2778.23	2005.34	1250.24	100.256	11	cos_per_21_ph_11	.83321179658293897941	4.7650386004639395665	.00038137000000000001627
ENSDART00000046945	433.668	371.999	613.551	324.758	194.148	245.654	219.493	357.988	642.465	399.741	95.9711	291.94	7	ct07-spike	.83223849702028196429	4.7469061458631296446	.00039194000000000001841
ENSDART00000047080	30.9824	164.33	82.1809	97.2683	36.9288	49.0149	53.5412	233.697	123.626	116.793	44.8387	97.7654	5	ct05-spike	.85045935530641203481	5.1125099160517404329	.00022781999999999999734
ENSDART00000047094	75.3564	132.052	215.888	40.154	46.5674	30.5627	49.1749	85.9305	136.278	162.282	161.155	36.1354	7	cos_per_28_ph_7	.83594662107580197663	4.8167702481468603892	.00035281999999999999994
ENSDART00000047271	25.6598	77.8824	147.213	62.5632	36.7016	57.3532	42.9278	79.8786	77.2301	50.6766	43.2762	35.3072	7	ct07-spike	.82430796152605201321	4.6043080983775901416	.00048683999999999999411
ENSDART00000047302	499.525	683.18	1358.83	527.116	485.238	542.126	481.031	531.923	1015.76	1076.07	405.591	114.851	9	ct09-spike	.82500678933955595706	4.6165195670743202072	.00047782999999999999736
ENSDART00000047308	129.101	220.921	123.594	98.9314	150.643	628.737	95.2366	85.6907	74.7349	311.17	479.81	418.182	19	ct19-spike	.81136919108426197589	4.3894358962405197744	.0006786300000000000535
ENSDART00000047362	1604.57	3638.24	5562.73	2404.77	3080.22	2026.69	2258.96	2862.7	4442.8	4257.31	787.27	1107.16	8	ct08-rigid	.82567698091152696982	4.6282929257183296201	.00046931000000000001795
ENSDART00000047391	5419.52	7978.69	9357.38	5977.36	7014.2	5530.99	6035.84	7127.99	9487.72	10007.5	4912.72	5181.69	8	cos_per_25_ph_8	.8174878140774709534	4.4884831628731598485	.0005818200000000000368
ENSDART00000047452	378.179	126.1	399.637	957.672	1136.17	1387.81	510.424	583.63	427.427	203.509	738.974	694.962	18	cos_per_28_ph_18	.83616892555788802088	4.8210270415550198209	.00035057000000000002656
ENSDART00000047523	2011.55	2390	3161.73	2227.85	1991.27	1471.23	2511.97	2260.49	2758.43	1556.06	1446.14	1666.67	7	cos_per_22_ph_7	.84816996478509398827	5.0632933402081201635	.00024480999999999998205
ENSDART00000047544	1195.13	178.318	79.3347	585.718	231	273.568	1142.25	109.104	118.736	87.2091	136.701	186.044	0	ct00-spike	.94087013140749098383	8.7826987500472295523	.0000025761000000000002043
ENSDART00000047670	204.878	258.242	430.416	251.846	2453.87	312.492	305.535	326.844	483.37	141.027	1812.45	200.473	16	ct16-spike	.97408178505425502269	13.617905246408000153	.000000044094999999999998793
ENSDART00000047772	33.2701	21.9909	24.1398	24.522	66.2366	26.0101	20.8572	19.325	23.0449	29.707	56.9755	35.2882	16	ct16-spike	.9369759118150310373	8.4803354274709903393	.0000035202999999999999903
ENSDART00000047936	38.3792	62.9709	74.5894	76.2412	33.3863	31.7294	40.4172	34.9401	72.7114	89.6143	40.3091	69.9721	10	ct10-spike	.81230818869910903501	4.404353229780170409	.00066301999999999995054
ENSDART00000048322	649.314	1460.46	1449.31	817.486	678.142	793.576	1143.21	1272.44	1337.35	579.241	620.435	204.114	6	cos_per_23_ph_6	.85469459505589895354	5.2063561064044598936	.00019881000000000000234
ENSDART00000048366	226.218	125.598	76.8404	133.553	770.919	155.344	192.96	238.593	190.452	50.7273	356.327	110.697	16	ct16-spike	.83811799127453601166	4.8586898608684201406	.00033135999999999999873
ENSDART00000048526	138.844	96.9754	65.8088	126.946	339.081	190.817	135.428	143.434	139.124	57.9898	221.712	79.4074	16	ct16-spike	.81504593633196398272	4.4484256588186301684	.0006190899999999999832
ENSDART00000048532	2572.49	1876.16	303.089	947.359	329.133	1992.59	1891.89	508.786	104.767	238.095	545.361	1979.61	23	ct23-box1	.8631542775534950529	5.4056559974244899891	.00014950999999999999663
ENSDART00000048727	1504.22	1219.25	1692.25	771.37	907.784	657.058	1010.51	1225.23	1377.73	569.057	438.784	614.673	4	ct04-box1	.87520307324995094689	5.7211421119925400802	.000096317000000000006343
ENSDART00000048855	5867.57	7026.26	4822.02	5115.01	3848.05	4838.18	7365.63	5822.86	3538.36	1075.68	2992.7	5600.31	3	cos_per_22_ph_3	.84782218984305401932	5.0559063954986598333	.00024747000000000001418
ENSDART00000048968	1888.01	2338.59	2778.52	2226.77	1671.5	1322.92	2178.91	2143.29	3565.1	2638.16	1522.45	1215.49	8	ct08-rigid	.91774464950493395143	7.3070889270128702719	.000012898999999999999659
ENSDART00000049103	600.244	542.065	969.202	646	648.929	510.666	709.542	570.219	847.514	640.289	432.404	597.651	9	ct09-spike	.86014337518365202584	5.3328100807330702793	.00016581000000000001337
ENSDART00000049129	1234.4	1416.58	731.194	508.884	536.525	890.302	1703.08	1266.34	480.884	103.118	273.57	678.896	1	cos_per_24_ph_1	.91964559093377096222	7.4046597882276703473	.000011512999999999999715
ENSDART00000049226	9894.06	10667.4	12103.8	12668.7	7995.71	5788.17	8312.55	12144.7	11144.4	7625.66	6014.71	8028	8	cos_per_22_ph_8	.87939383683877803133	5.8410344497863402324	.00008179200000000000565
ENSDART00000049230	1522.12	1161.18	2245.73	1718.51	1676.39	1520.28	1125.28	1255.34	1893.08	1803.93	1837.36	1485.05	12	ct12-box1	.82434823756977804177	4.6050101013261102167	.00048631999999999999231
ENSDART00000049331	565.664	451.55	209.96	520.201	405.262	557.002	649.16	527.151	407.366	133.943	362.997	581.996	23	cos_per_26_ph_23	.81624552918145998337	4.4680145547592298172	.00060055999999999998273
ENSDART00000049368	26.1103	14.3413	20.4812	57.7629	40.5497	45.767	21.9738	24.3246	32.5736	48.6405	42.7597	18.8031	15	cos_per_22_ph_15	.87340602695564795166	5.6714448448365804012	.00010312999999999999685
ENSDART00000049400	201.551	482.955	48.2428	225.183	137.187	110.378	297.559	302.734	115.586	76.6985	55.2731	35.7788	3	ct03-spike	.85882778896574196725	5.3016603567879396763	.00017336000000000000715
ENSDART00000049430	54.8856	102.417	92.416	65.6544	44.0041	20.5272	40.6027	27.1483	75.78	148.636	68.3374	30.8684	7	cos_per_28_ph_7	.84458687598536996699	4.9882811845179899635	.00027335000000000000357
ENSDART00000049617	130.74	52.4898	64.8301	92.6275	131.945	156.91	103.411	72.9045	47.287	33.7023	68.5353	109.632	21	cos_per_27_ph_21	.86744564607759799824	5.5134226727238804244	.00012845000000000000515
ENSDART00000049624	28.877	51.9358	65.5709	71.5856	26.5799	23.7551	25.6243	30.9455	43.0134	52.1414	30.4076	30.9094	9	ct09-box1	.83081975301349098029	4.7207303213203202219	.00040777000000000000746
ENSDART00000049684	1235.71	1828.77	1879.41	1827.93	549.764	1126.12	1501.77	1684.96	921.361	493.445	573.371	1482.6	6	cos_per_21_ph_6	.8454505256440609795	5.0061427455128102437	.00026624999999999999362
ENSDART00000049722	1141.04	1112.63	1870.23	1186.79	1231.14	885.269	1167.42	1605.25	2314.55	1169.63	779.074	1386.75	7	ct07-spike	.86758041918460004904	5.5168856377418302728	.00012783000000000000092
ENSDART00000049760	206.745	328.392	280.07	190.492	158.468	115.055	228.713	235.437	254.213	91.6553	114.597	268.968	6	cos_per_21_ph_6	.86420433667994200899	5.4315869216668701824	.00014411999999999999572
ENSDART00000049836	264.735	348.501	608.695	409.214	253.453	217.184	351.015	514.495	823.89	386.761	116.625	378.499	9	cos_per_21_ph_9	.85907550476921401561	5.3074948042793996805	.00017191999999999999383
ENSDART00000050177	1291.92	1447.25	1718.08	1471.63	784.127	1217.64	1769.41	1453.85	1567.76	669.283	831.7	1207.65	6	cos_per_22_ph_6	.82885324765678902725	4.6849383827949298009	.00043050999999999999641
ENSDART00000050271	1905.82	1588.16	2273.11	1806.4	7927.64	1300.02	2430.96	1755.59	1578.75	631.661	5700.75	229.503	16	ct16-spike	.93482200400144899177	8.3244953644744494881	.0000041490999999999997975
ENSDART00000050396	422.581	741.038	241.587	308.248	299.581	257.884	478.796	444.54	175.185	291.629	193.809	267.751	3	ct03-spike	.85464288650965203331	5.205187618415189732	.00019914999999999998892
ENSDART00000050445	137.49	158.969	123.09	163.273	629.019	149.587	287.087	168.566	86.2974	144.764	329.004	214.976	16	ct16-spike	.83552918305939405386	4.8087981922953302316	.00035707000000000002193
ENSDART00000050597	610.741	1253	1180.78	803.786	667.859	845.978	659.212	1063.27	1153.08	397.196	520.626	875.278	6	ct06-spike	.8678565114061960184	5.5239951283899602075	.00012657000000000000282
ENSDART00000050603	3432.22	4075.56	4969.49	4034.07	2994.95	2597.8	2403.67	3461.87	4509.67	2458.62	1342.43	1614.12	7	ct07-rigid	.82762256668264500004	4.6628222820571103568	.00044524000000000001293
ENSDART00000050644	2536.28	2309.75	1272.18	1313.01	650.744	1187.76	1850.09	1419.57	843.79	674.652	586.013	826.495	2	ct02-spike	.84193075916310600171	4.9341919726042098304	.00029611999999999997699
ENSDART00000050651	1610.4	1958.65	2076.88	1121.73	874.155	1172.22	1939.76	1203.19	1617.85	667.255	539.905	1514.83	5	cos_per_22_ph_5	.83049342782098001248	4.7147518788502900122	.00041147999999999998379
ENSDART00000050824	2775.79	4641.01	5237.43	5250.72	2339.51	2961.74	2794.11	5391.48	4060.13	1020.31	2016.63	2307.94	8	cos_per_21_ph_8	.83385133856056903312	4.777031923571810168	.00037453999999999997494
ENSDART00000050847	8208.85	4412.43	4166.83	2569.05	1033.38	2124.55	5538.54	2478.55	1964.68	302.305	544.445	3060.25	1	ct01-spike	.82977594015828803897	4.7016620526773795774	.00041971999999999999977
ENSDART00000050911	510.486	708.187	1169.33	531.453	364.411	352.415	635.327	505.597	851.479	402.281	212.316	135.391	7	ct07-rigid	.83993398292174603625	4.8943436906348303239	.00031418999999999999879
ENSDART00000050940	523.048	389.346	686.488	270.437	235.164	279.06	350.559	456.562	802.193	484.13	190.15	289.265	7	ct07-spike	.84526475551393498442	5.0022891826123201398	.0002677600000000000249
ENSDART00000051055	1452.16	1659.21	1794.37	771.453	780.285	531.448	687.317	908.595	1365.56	1519.22	402.416	315.708	5	cos_per_27_ph_5	.85726372259009797627	5.265146683033839814	.00018267000000000001118
ENSDART00000051082	2118.74	1760.99	2827.46	2162.15	1611.85	1090.31	2245.62	2220.12	2448.65	2416.33	652.765	1070.9	6	ct06-box2	.87420614742782398743	5.6934494370474002523	.00010005000000000000601
ENSDART00000051092	778.518	1171.49	1028.73	828.286	612.06	812.236	1133.09	998.469	1126.66	256.753	441.697	811.068	5	cos_per_22_ph_5	.84825657532249498782	5.0651366227935996633	.00024414999999999999853
ENSDART00000051139	688.56	525.264	1720.27	1236.93	830.28	874.367	1247.41	1464.44	2710.91	1017.35	1031.88	648.449	8	ct08-spike	.81902611531747704365	4.5140911924078199746	.00055924999999999995982
ENSDART00000051166	545.422	668.02	490.361	422.293	338.166	289.388	680.44	520.488	461.156	160.284	193.328	204.583	3	ct03-box1	.86097892959583000039	5.3528057234152202071	.00016116000000000000876
ENSDART00000051196	617.011	807.678	1436.12	777.366	832.873	722.28	818.219	603.888	1014.63	661.13	465.987	460.46	8	ct08-spike	.81006604120874803332	4.3688980059566802083	.00070074999999999998401
ENSDART00000051231	516.41	512.966	496.773	483.056	634.81	665.501	379.038	403.636	461.859	399.126	639.623	790.992	18	ct18-spike	.88588155046295802286	6.0386591945533103498	.000062742000000000003389
ENSDART00000051236	750.796	1041.28	90.5394	811.29	982.982	910.815	773.683	843.511	124.317	374.536	1029.36	813.914	21	ct21-box2	.9179322090476369489	7.3165713293038701082	.000012757000000000000002
ENSDART00000051344	603.369	581.163	928.682	417.873	482.758	402.816	648.293	673.235	881.42	490.5	321.888	668.02	7	ct07-spike	.8329301355881579827	4.7597764877727701816	.00038440000000000001945
ENSDART00000051357	152.676	252.273	248.539	201.667	181.29	140.672	183.492	255.365	435.264	229.918	76.1036	131.777	8	cos_per_23_ph_8	.82341461433589302477	4.5887930939961103505	.00049854999999999994806
ENSDART00000051392	116.713	135.506	61.254	60.84	679.51	240.214	165.989	57.0203	54.9156	31.4358	678.138	29.6137	16	ct16-spike	.96499687491365604419	11.635674533534100306	.00000019509999999999999339
ENSDART00000051558	1696.81	1215.42	299.851	931.424	348.803	1611.66	1508.51	751.385	212.427	70.6568	361.663	1826.66	23	ct23-box1	.89410998251725304353	6.3133641122078403285	.000043779000000000002158
ENSDART00000051587	452.017	758.863	931.125	606.74	374.245	315.208	484.142	462.022	625.907	476.561	416.623	379.616	7	ct07-rigid	.82188080935630303259	4.5624015147829402039	.0005191500000000000151
ENSDART00000051607	982.286	1158.52	2401.65	1340.26	1292.22	1500.08	1303.47	1618.46	2787.29	1396.1	1200.21	1066.48	8	ct08-spike	.93506826072545001782	8.3419321471060996487	.0000040729999999999997977
ENSDART00000051611	554.652	160.374	920.96	759.944	153.192	296.623	348.012	185.62	1168.63	100.034	109.94	65.737	9	ct09-spike	.84009945581243294921	4.8976199808750600084	.00031265999999999997787
ENSDART00000051864	559.761	891.407	1311.63	710.24	657.234	529.47	577.589	816.663	1139.72	1078.83	549.514	632.798	8	cos_per_25_ph_8	.87359683439929702864	5.6766746558036400572	.00010239000000000000054
ENSDART00000051866	2385.41	1777.73	1773.06	964.075	170.935	701.709	1483.55	1150.6	3048.2	531.174	75.1578	565.484	4	ct04-box1	.82666839514720902304	4.6458223373518299226	.00045691999999999998242
ENSDART00000051906	192.791	216.897	628.076	1074.48	1274.93	1537.52	191.715	101.418	240.754	276.175	1160.07	732.547	16	cos_per_28_ph_16	.85660519497846898673	5.2499384808914300038	.00018671000000000000638
ENSDART00000051970	359.567	170.68	422.98	233.145	1456.17	172.012	348.397	126.896	441.137	329.883	785.253	76.2438	16	ct16-spike	.87405562619668897284	5.6892949327200597054	.00010061999999999999547
ENSDART00000051972	943.682	550.24	1826.13	277.074	3599.64	234.101	656.309	210.572	968.66	867.219	1995.92	396.159	16	ct16-spike	.82497265344579895352	4.6159215338503898352	.00047826999999999998637
ENSDART00000052004	59.3565	108.849	120.816	95.7622	40.1098	68.188	57.7392	160.281	110.038	35.659	30.9006	36.7786	7	cos_per_22_ph_7	.88757087905533604832	6.0927309846186501474	.000058405000000000000698
ENSDART00000052029	29.3164	36.9918	91.4348	59.7417	70.5369	395.655	62.1019	32.0261	59.3467	152.829	218.058	272.159	19	ct19-spike	.89051949131961205541	6.1899115975122800393	.000051400000000000002544
ENSDART00000052062	2943.47	4159.49	1859.59	3067.56	629.049	2618.13	2805.31	5915.52	2836.82	483.509	1017.62	2191.93	4	ct04-rigid	.81860540902635203775	4.50705859674985021	.00056535000000000005388
ENSDART00000052079	10175.4	6723.94	5268.47	6488.82	4049.89	6971.52	9450.14	9225.15	5072.26	1025.13	3887.77	10632.5	0	ct00-sine	.83986028238232202092	4.8928859451641404377	.00031488000000000002099
ENSDART00000052096	2623.96	3327.06	3157.81	1452.29	1443.88	1208.43	1944.24	2816.81	3694.7	2361.62	994.784	1689.35	5	cos_per_25_ph_5	.92481719483799995629	7.687796665372549576	.0000083291999999999998065
ENSDART00000052185	509.915	406.277	771.489	609.234	480.795	504.995	454.831	435.558	984.934	709.585	450.377	571.203	9	ct09-spike	.91837992031722104347	7.3393324841128100289	.000012422000000000000668
ENSDART00000052268	1574.63	1828.4	2192.93	1849.09	1886.09	889.308	1423.75	1834.8	1933.58	1313.68	953.668	933.482	8	cos_per_23_ph_8	.81283891237210403879	4.4128289998643701608	.00065432000000000001012
ENSDART00000052323	752.339	1221.48	1198.96	960.841	781.433	541.374	824.66	953.867	1046.37	493.211	450.018	632.595	7	cos_per_22_ph_7	.87161070702980603109	5.6227709505799996492	.00011029999999999999766
ENSDART00000052342	147.4	202.026	428.728	217.247	132.739	149.079	207.449	216.732	351.988	521.966	148.523	190.88	10	ct10-spike	.81380972332778500622	4.4284170375686802146	.00063863999999999999761
ENSDART00000052358	171.906	225.699	120.154	112.205	57.6812	86.3782	84.4996	172.571	148.821	93.8592	83.5561	60.3295	3	cos_per_27_ph_3	.86725647829779795028	5.5085703165783597157	.00012933000000000001027
ENSDART00000052365	4799.08	3917.54	4003.94	2709.45	2218.57	3221	3722.09	4406.72	3924.27	1002.52	2430	4945.67	2	ct02-box2	.85643507572471300193	5.2460254108382402549	.0001877600000000000048
ENSDART00000052387	310.495	118.285	30.7916	39.8428	3172.91	82.8223	173.082	54.6607	15.4207	53.7466	1337.65	50.925	16	ct16-spike	.90337782884595396737	6.6614462581350002424	.000028141999999999999237
ENSDART00000052437	1107.41	1206.31	1984.5	1378.38	1381.11	1199.14	1133.49	1030.79	1834	1379.72	994.692	434.624	9	ct09-spike	.82392457636208704663	4.5976366779404402862	.00049184000000000000722
ENSDART00000052471	283.445	2088.9	777.709	1331.94	148.625	383.031	960.211	2924.12	1530.35	121.357	191.847	863.394	5	ct05-spike	.86687206039858799578	5.4987392048718497506	.00013112999999999999982
ENSDART00000052617	1047.67	1166.83	1058.61	969.669	350.836	1048.73	1077.32	1250.73	1149.45	674.254	528.312	733.175	4	ct04-rigid	.89007589304236600647	6.1750566221868901096	.000052410000000000001345
ENSDART00000052641	10731.6	10598.3	7730.85	7099.06	2730.9	3564.96	9387.19	8283.7	3295.14	2775.23	700.956	5358.36	4	cos_per_23_ph_4	.82788400867268296945	4.6675025714585496317	.00044208000000000002285
ENSDART00000052660	1211.9	1896.69	1967.94	942.828	4976.96	1149.3	1510.68	1139.89	1636.71	2050.13	2788.73	155.702	16	ct16-spike	.81423433743503104143	4.4352693734743402487	.00063186999999999997942
ENSDART00000052726	304.747	286.941	457.125	297.694	341.805	246.394	321.959	377.87	535.239	416.499	212.094	137.134	8	ct08-rigid	.84719155393496703432	5.0425704059773899246	.00025235999999999997583
ENSDART00000052844	43.5519	34.3428	37.7254	13.8093	54.3077	100.548	48.5927	35.2085	29.3523	55.8662	117.393	264.663	19	ct19-spike	.82136051587878999847	4.5535188113755795669	.00052629000000000000434
ENSDART00000052977	1001.77	425.063	303.541	157.686	4694.7	180.918	1230.58	788.624	705.022	125.562	1673.52	61.4403	16	ct16-spike	.8151926187620880393	4.4508117274766902938	.00061680000000000003053
ENSDART00000052984	52.4138	45.5895	81.4461	54.6298	40.8241	34.4464	54.8679	40.9439	75.2002	85.8937	52.7634	35.1809	10	ct10-spike	.83403860706088195354	4.7805556916519096333	.00037254999999999997536
ENSDART00000053012	3959.02	2530.78	4038.03	2922.65	1661.12	2299.91	3674.26	2586.39	3905.61	3980.72	1354.78	2451.28	5	ct05-box2	.81190990892738801321	4.3980137557262297676	.00066960999999999995351
ENSDART00000053189	519.753	681.956	560.741	485.522	305.464	318.199	591.703	506.44	579.243	401.801	130.791	550.79	5	cos_per_23_ph_5	.83049061350907404933	4.7147003873853599032	.00041151000000000002247
ENSDART00000053210	742.891	964.616	1129.18	988.982	735.279	874.531	1020.86	1029.5	1228.19	528.231	680.021	970.979	8	cos_per_20_ph_8	.83128965034228596842	4.7293667124816396452	.00040246999999999998705
ENSDART00000053220	669.222	447.047	725.113	1218.84	369.122	331.116	455.112	700.518	1007.76	740.987	340.668	360.167	12	cos_per_20_ph_12	.81388075503386103637	4.4295618667453195982	.0006375000000000000458
ENSDART00000053282	773.145	1044.16	850.117	948.81	566.549	612.516	1011.8	973.576	847.981	578.348	415.87	652.944	6	cos_per_22_ph_6	.87055402518912694543	5.5945650091333600784	.00011471000000000000456
ENSDART00000053362	597.295	653.478	953.017	607.209	597.628	626.25	526.506	425.616	858.783	509.09	400.065	363.929	8	ct08-spike	.83757633840804501801	4.8481612561750395685	.00033660999999999999081
ENSDART00000053397	27.215	16.3528	35.5143	68.7359	46.7977	53.2758	10.6944	18.9792	27.7029	78.746	54.4817	34.4483	15	ct15-box1	.88690029373989198724	6.0711307235243801017	.000060096999999999997373
ENSDART00000053438	505.554	358.197	1126.52	600.878	607.098	449.293	501.069	489.506	748.776	560.764	359.923	327.264	9	ct09-spike	.85739962848905904025	5.2682974249058203142	.00018185000000000000209
ENSDART00000053460	338.759	444.962	747.777	714.294	343.185	444.048	284.849	390.705	530.622	843.084	197.747	363.824	10	ct10-spike	.88089802008574402681	5.8855020953837700048	.00007701900000000000239
ENSDART00000053472	1158.64	1395.52	1893.57	1191.43	1226.03	1322.21	1199.03	1006.38	2081.46	1798.78	860.648	1511.88	9	ct09-spike	.81354530947442804667	4.4241605994300501337	.00064287999999999997057
ENSDART00000053473	8302.44	4787.73	6418.09	4534.86	885.839	4871.7	8250.33	5907.69	7237.15	1415.79	1723.19	3273.33	3	ct03-box1	.83887916173427401478	4.873567150113379931	.00032407999999999997356
ENSDART00000053531	1437.3	1669.66	2850.76	2480.65	971.156	1440.62	2666.23	2485.42	1582.33	332.237	645.857	2404.72	7	cos_per_20_ph_7	.86965416260949002236	5.5707972998816801535	.00011856000000000000327
ENSDART00000053539	227.184	285.875	344.118	192.677	257.663	104.367	221.768	265.987	289.097	239.018	103.693	37.299	7	ct07-rigid	.85295338232530304445	5.1673220483308499595	.00021037000000000000686
ENSDART00000053600	592.139	554.495	1029.53	478.592	399.655	367.433	449.202	505.778	722.914	588.959	295.704	347.327	9	ct09-spike	.83186583529420998762	4.7400014154354801477	.00039605000000000000447
ENSDART00000053638	45.4537	38.6853	57.8745	154.049	82.6332	75.5634	104.95	119.945	84.7639	174.384	46.3838	63.8619	12	ct12-spike	.82564555228689895383	4.6277394427698501644	.00046970999999999997346
ENSDART00000053750	34.4863	41.675	52.2062	82.3807	236.147	153.267	30.9877	31.8407	37.7407	234.193	112.462	35.0321	16	cos_per_21_ph_16	.8349590586651940427	4.7979547240547901765	.00036293000000000002342
ENSDART00000053763	97.9497	99.6958	96.172	355.624	186.463	126.741	62.0949	189.842	90.9205	341.694	70.7201	86.6069	12	ct12-spike	.9172826284794529661	7.2838624760878500908	.0000132549999999999993
ENSDART00000053864	12077.6	14111.2	11631.8	9558.38	5551.11	7550.1	9286.08	10602.1	10551.6	4855.98	5803.78	2326.06	5	ct05-box1	.8441030073204009998	4.9783335456383497331	.00027739000000000002587
ENSDART00000053921	9502.83	7824.89	4953.32	6829.76	2151.38	7388.8	8937.38	8429.35	5093.23	754.348	2711.77	5618.98	1	ct01-sine	.8454764941429070424	5.0066819358333098933	.00026602999999999999911
ENSDART00000053935	1354.11	870.11	567.494	706.827	706.218	719.413	1203.46	817.702	582.719	61.7178	372.467	384.267	1	ct01-spike	.8468698828831170422	5.0357971929756297769	.00025488000000000002624
ENSDART00000054020	1247.56	1319.95	156.54	1062.81	999.674	1026.86	1119.56	1370.11	299.277	436.051	815.778	973.672	21	ct21-box2	.856576391198876963	5.2492754868247804012	.0001868899999999999945
ENSDART00000054069	161.678	190.437	436.923	242.065	258.18	226.152	229.292	295.363	401.048	304.364	93.1083	157.199	9	ct09-spike	.84288310241537600653	4.9534411308239398863	.00028780000000000000243
ENSDART00000054205	2067.78	2500.75	3235.24	1380.34	1345.61	1104.92	1281.11	1642.41	2545.04	2981.48	609.452	798.015	6	cos_per_26_ph_6	.83678037180357900393	4.832776127887499662	.00034444999999999999707
ENSDART00000054228	689.453	694.513	1000.48	441.983	223.184	369.047	516.571	582.71	940.284	211.623	83.602	239.544	5	ct05-box1	.88347498768881904674	5.9635484399679601353	.000069350999999999993813
ENSDART00000054266	114.066	148.866	199.908	107.364	1908.35	287.612	333.756	154.723	216.908	89.5356	767.069	302.89	16	ct16-spike	.86668105635462600045	5.4938691572353599568	.00013201999999999999976
ENSDART00000054331	50.6557	24.6894	31.0834	120.911	124.349	96.4025	62.8959	32.5294	107.497	185.435	165.387	60.7974	15	cos_per_22_ph_15	.91624688084313399283	7.2324640509464597216	.000014080000000000000718
ENSDART00000054335	183.179	198.727	158.051	268.461	344.088	368.931	316.959	214.945	183.052	126.539	191.361	218.844	20	cos_per_28_ph_20	.85065992581501503889	5.1168711632389998201	.0002263699999999999892
ENSDART00000054356	690.616	664.615	1097.04	454.034	404.764	414.734	600.607	773.491	942.333	866.095	255.504	478.6	6	cos_per_25_ph_6	.8270186591563040146	4.6520480008147799822	.00045260999999999999149
ENSDART00000054368	1524.76	1911.6	2693.46	1512.79	737.649	1292.92	1528.67	1581.51	2206.49	1153.45	758.111	1344.45	7	ct07-spike	.85191781087477602696	5.144408305929410119	.00021748000000000001163
ENSDART00000054441	109.811	71.2526	126.974	200.254	117.501	218.575	64.2727	62.4126	207.242	233.17	239.811	165.705	14	ct14-box2	.81477447105986200437	4.4440164772918802072	.00062334000000000000519
ENSDART00000054442	321.207	185.585	499.196	249.32	205.117	399.496	272.679	274.002	529.979	281.113	339.552	269.217	8	ct08-spike	.84880752699128303451	5.076896227526069616	.00023997999999999998933
ENSDART00000054559	939.771	780.933	153.683	601.314	656.652	1005.44	883.586	617.499	174.591	149.982	431.068	562.621	22	cos_per_26_ph_22	.83783554913431601552	4.8531937722743601071	.00033408999999999999461
ENSDART00000054574	470.377	231.362	764.404	518.571	449.94	438.252	559.634	602.124	891.679	369.978	327.281	525.631	8	ct08-spike	.81201474139841800515	4.3996806374612296153	.00066786999999999998711
ENSDART00000054581	25.4175	35.6893	43.298	34.5281	34.0292	63.854	33.524	16.24	33.0703	37.4641	31.5968	54.1054	20	ct20-spike	.83151695011972703853	4.7335560902987996457	.0003999300000000000012
ENSDART00000054605	284.707	454.892	481.871	278.71	279.492	147.755	242.636	443.516	571.09	262.43	84.9589	177.835	7	cos_per_23_ph_7	.91807617541814501294	7.3238709358796301174	.00001264799999999999986
ENSDART00000054790	42.3083	36.0476	48.3077	89.8471	38.9821	26.0283	31.505	59.5046	61.821	179.411	55.6884	23.2759	12	ct12-spike	.84474569681480404792	4.9915555882036803936	.00027202999999999998232
ENSDART00000055019	454.19	417.117	111.99	71.9459	2324.09	340.094	446.08	185.014	493.456	98.5014	1371.69	67.1545	16	ct16-spike	.92164492708929601772	7.5109263870393201401	.000010184999999999999894
ENSDART00000055053	126.598	127.031	50.6771	87.8985	1658.26	72.3387	407.268	138.507	169.221	134.285	609.137	32.459	16	ct16-spike	.8480508555938229831	5.0607607703727497395	.00024571999999999999875
ENSDART00000055055	46.6761	86.7406	69.2107	36.7698	70.3671	896.515	62.8421	49.4857	30.3797	84.9128	522.037	495.183	19	ct19-spike	.88426644435745604955	5.9880075588634902317	.000067119999999999994337
ENSDART00000055123	284.842	429.228	542.198	322.492	320.661	255.109	423.879	531.2	697.722	196.243	176.987	348.938	7	ct07-spike	.84738930100508902399	5.0467439788321097893	.00025082000000000001429
ENSDART00000055136	1011.38	437.568	78.1248	108.162	2679.71	82.7703	399.309	202.235	454.963	388.637	1904.4	288.485	16	ct16-spike	.92980936511755696294	7.9890865469290099909	.0000059583000000000001955
ENSDART00000055201	630.069	1253.26	653.825	613.639	433.729	832.223	978.247	1031.3	712.787	107.144	397.49	720.806	4	cos_per_22_ph_4	.86008919614061796199	5.3315192465338698824	.00016611999999999998837
ENSDART00000055252	279.533	263.941	289.004	200.757	117.27	150.543	281.46	267.076	437.57	204.933	47.6036	122.746	5	ct05-box1	.86800869327799901054	5.5279227330863003331	.00012587000000000001291
ENSDART00000055339	258.195	632.248	1134.75	438.51	631.029	318.681	514.584	532.682	793.699	331.945	140.644	211.916	7	ct07-spike	.8420359819290219594	4.9363109532614597441	.00029520000000000001968
ENSDART00000055340	701.406	396.176	880.595	1895.46	1513.82	1193.9	538.47	642.765	895.655	320.693	1818.25	2090.74	15	cos_per_28_ph_15	.83292424226655203956	4.7596665153857298236	.00038446999999999998321
ENSDART00000055385	467.626	662.649	605.302	373.894	328.688	265.686	473.325	459.289	610.569	364.736	166.138	513.519	6	cos_per_22_ph_6	.83038300189851199651	4.7127323666542197955	.00041273999999999998189
ENSDART00000055394	309.263	56.213	60.0404	33.5545	1232.17	45.3055	74.8336	51.011	55.3164	153.137	984.407	137.614	16	ct16-spike	.97331785730433995063	13.413614387675099948	.000000050922999999999998789
ENSDART00000055414	503.684	651.359	838.127	518.773	366.425	395.556	545.866	715.272	664.23	270.508	129.57	387.694	7	cos_per_22_ph_7	.91930464947863199665	7.3869173987283298644	.000011753000000000000805
ENSDART00000055504	8695.49	7505	7223.64	5976.25	6034.41	5524.04	6288.56	7903.97	8229.33	4660.71	5171.32	5902.47	4	ct04-box1	.85089571231179794708	5.1220084946188100261	.00022468999999999999173
ENSDART00000055528	48.7764	59.1398	29.5856	69.7622	122.92	64.2321	58.4444	24.2658	30.6564	118.889	92.5363	62.1248	16	cos_per_22_ph_16	.82588061977830795612	4.6318824509845599735	.00046673999999999999343
ENSDART00000055564	1081.29	1162.18	1850.25	1240.9	1107.44	1184.82	1336.03	1568.04	1831.85	1040.18	925.838	1325.57	7	ct07-spike	.87776180969384098862	5.7936595908569099578	.000087229000000000001197
ENSDART00000055618	718.659	1165.19	1473.29	986.211	749.126	510.411	794.802	931.123	1094.26	1272.18	581.508	892.106	8	ct08-sine	.83655392212338897107	4.8284178409425599909	.00034671000000000001947
ENSDART00000055627	429.692	330.737	273.18	424.112	1461.15	400.277	593.115	379.895	229.43	300.767	826.976	574.322	16	ct16-spike	.86016361527112694674	5.3332924857191601475	.00016569999999999998901
ENSDART00000055694	6678.41	5233.54	7179.71	4554.62	1663.92	4445.45	5614.94	7994.5	6401.56	5818.38	2274.15	3300.95	4	cos_per_25_ph_4	.8696438455133860268	5.5705261272711004139	.00011861000000000000449
ENSDART00000055737	772.161	955.586	1375.95	888.74	824.75	888.091	1209.71	1695.61	1480.03	573.927	710.342	1418.26	8	cos_per_20_ph_8	.84639520385731703556	5.0258378639240302022	.00025863999999999997669
ENSDART00000055845	436	731.507	1234.95	548.568	452.352	431.878	600.621	655.379	1054.88	922.043	344.763	345.403	8	ct08-rigid	.87518111769600204219	5.7205288972066501429	.000096397999999999994217
ENSDART00000055857	67.8276	88.1458	74.6412	23.5195	120.879	39.4726	39.1086	34.1022	47.8979	68.141	138.26	30.35	16	ct16-spike	.83542080890014602801	4.8067330252143500857	.00035816999999999999445
ENSDART00000055872	850.548	781.252	579.58	603.69	387.88	423.66	696.996	631.855	602.006	227.236	219.608	494.783	3	ct03-sine	.83889652044016804755	4.8739075520388901452	.00032391000000000000738
ENSDART00000055972	301.431	1626.15	2346.67	1831.21	1087.55	696.867	717.875	1880.26	3636.81	4090.99	1080.86	513.959	9	ct09-sine	.86322654171797297273	5.4074316677180300772	.00014913000000000000366
ENSDART00000055973	1422.23	1841.71	1973.29	2289.81	870.312	840.042	1340.51	2550.31	2361.67	1747.2	595.696	2155.58	9	cos_per_20_ph_9	.83791730366028904786	4.8547832999987399205	.0003333000000000000242
ENSDART00000056035	281.058	339.796	43.553	161.139	59.0694	147.842	158.262	356.742	89.6615	68.7805	47.4527	133.878	3	ct03-spike	.89939254759548703522	6.5061915291010103957	.000034208000000000001806
ENSDART00000056039	478.92	512.921	30.2636	164.95	102.022	320.966	449.887	461.454	105.801	67.6524	153.235	332.349	1	ct01-box1	.93501478344937805076	8.3381374236734693284	.0000040894000000000001828
ENSDART00000056103	160.662	161.397	268.194	158.025	157.34	168.358	149.416	163.309	383.02	207.473	86.0446	119.379	9	ct09-spike	.88308564893968899412	5.9516019660929702084	.00007046900000000000581
ENSDART00000056149	367.118	237.108	707.936	412.576	315.114	201.475	366.848	457.432	737.863	431.072	251.386	326.415	9	ct09-spike	.91606774947301095047	7.2236671959345901683	.00001422699999999999948
ENSDART00000056208	331.097	428.264	291.752	384.184	189.366	226.629	346.332	372.358	393.427	292.177	155.825	357.792	5	ct05-box2	.82366368319267802001	4.5931080299719804216	.00049525999999999997109
ENSDART00000056256	278.571	424.188	421.558	360.745	136.573	178.351	243.336	346.084	528.85	196.86	136.581	339	7	cos_per_22_ph_7	.8414260605673370419	4.9240551508501297917	.00030060999999999998313
ENSDART00000056372	47.254	28.9493	39.4075	77.8878	73.4127	42.619	53.1996	26.6552	57.3053	125.368	54.0131	63.3533	13	ct13-spike	.82277602449025699638	4.5777675570638196589	.00050704999999999999204
ENSDART00000056453	115.991	2306.94	1258.61	909.054	168.103	1314.68	208.279	3434.55	1578.66	830.695	66.8106	475.762	5	ct05-spike	.89908464353146000381	6.4945608410617703399	.00003471599999999999762
ENSDART00000056458	1286.78	2046.55	2248.99	1796.32	409.966	620.043	1338.96	1683.89	2563.69	2181.53	539.583	948.479	7	ct07-sine	.92750487068428699722	7.8462843404591797736	.0000069751999999999997259
ENSDART00000056514	599.062	650.649	1192.47	740.616	373.276	480.538	737.895	616.354	1182.73	361.916	352.05	559.509	8	ct08-spike	.87994042996294596914	5.8571026652581599237	.000080031999999999995396
ENSDART00000056640	4544.21	2889.98	2374.87	2523.79	2217.37	2341.79	4422.08	2123.26	2032.16	366.519	1665.77	1923.87	1	ct01-spike	.85621023658229200581	5.2408635126055598263	.00018916000000000001173
ENSDART00000056642	1074.77	1547.54	1679.68	1046.08	993.815	861.544	1506.27	1456.39	1603.95	780.551	477.038	880.069	6	cos_per_23_ph_6	.90605820905212597349	6.7710902440722096074	.000024562999999999998436
ENSDART00000056649	303.348	457.172	303.584	249.027	218.511	141.568	249.31	254.573	296.422	135.207	59.149	88.5206	5	ct05-sine	.8111497902473360222	4.3859647759367996755	.00068230999999999999116
ENSDART00000056657	75.8175	38.9285	47.5588	46.8787	139.303	71.3066	61.0208	57.7583	53.0373	126.138	114.701	36.1042	17	cos_per_20_ph_17	.81339079862380803121	4.4216770984876596629	.00064537000000000003651
ENSDART00000056734	675.611	844.62	939.417	708.803	671.357	557.391	909.134	1000.38	1242.2	626.755	493.247	709.929	7	cos_per_22_ph_7	.8472282146489149568	5.0433435914162796365	.00025207000000000001757
ENSDART00000056788	8441.74	8293.95	15558.5	12339.4	9252.79	10340.8	10547.4	13330.8	14053.6	12127.1	9306.55	8143.13	10	cos_per_21_ph_10	.8488697385451210442	5.0782277893362497423	.00023950999999999998875
ENSDART00000056790	303.681	375.731	845.73	357.963	263.896	279.591	268.897	337.559	611.277	825.282	111.248	275.808	10	ct10-spike	.81534197348735404365	4.453243889209799633	.00061446999999999999016
ENSDART00000056813	9728.5	7964.38	5864.66	2662.61	4791.23	6712.31	4871.57	9723.77	6343.02	584.575	5657.88	8880.24	1	ct01-box2	.82807949864106200621	4.6710085156322502797	.00043972999999999999284
ENSDART00000056899	997.475	879.567	930.395	1194.8	762.982	600.863	961.695	896.801	1138.65	1074.85	502.21	472.302	6	ct06-box2	.87653132960802704332	5.7585235612818204132	.000091510999999999998486
ENSDART00000056951	470.777	506.781	863.718	502.112	419.311	380.483	482.425	504.498	753.789	303.597	223.579	266.219	7	ct07-spike	.8809752861408539637	5.8878075701976300138	.000076779999999999993328
ENSDART00000057073	6576.8	3145.11	989.399	3890.97	3542.97	3938.88	6970.92	3535.48	1064.16	120.303	3292.47	4451.33	22	cos_per_25_ph_22	.83419623700628997565	4.7835259683751596427	.00037089000000000002175
ENSDART00000057090	5913.61	3766.03	2762.09	2140.94	1126.25	1342.88	3320.78	3941.25	3179.4	488.666	1407.65	1716.46	3	ct03-box1	.87017049754797803907	5.5844069333130503807	.00011634000000000000081
ENSDART00000057107	27.0956	77.687	13.5088	20.0863	19.897	40.384	15.5506	41.2899	22.0321	16.0229	12.3879	16.642	4	ct04-spike	.8162588166480370111	4.4682324986235801845	.00060035000000000003726
ENSDART00000057124	1681.73	1669.42	2541.38	751.991	843.115	1246.29	1798.49	2860.91	2969.79	1207.33	842.076	1037.16	5	ct05-box1	.86961497456983205545	5.5697674479657903746	.00011872999999999999656
ENSDART00000057125	223.624	328.55	115.456	150.178	81.1852	127.783	302.525	627.472	223.929	19.2326	39.3028	133.017	3	ct03-spike	.8601939311753290518	5.3340152203085695604	.00016552999999999999572
ENSDART00000057155	63.6139	62.5525	152.348	115.623	74.0137	66.8308	72.3504	92.5565	109.976	90.6013	38.7205	30.0795	10	cos_per_22_ph_10	.85535412573030600303	5.221310517129269968	.00019457000000000000228
ENSDART00000057192	5545.4	4955.92	6270.33	5700.59	15227.6	6002.37	7102.34	6582.84	5496.11	1806.95	15681.5	5017.86	16	ct16-spike	.94784388111224704421	9.4038805673030392285	.0000013918999999999999634
ENSDART00000057263	98.7663	204.013	268.943	157.174	139.601	93.3532	144.793	203.864	279.491	167.13	55.0214	101.178	8	cos_per_23_ph_8	.92886503465301595295	7.9297616309476399721	.0000063597000000000002826
ENSDART00000057327	34.5843	44.1382	59.2902	60.0989	50.9311	24.0461	28.2756	38.6345	57.8433	101.561	41.678	18.7288	10	cos_per_25_ph_10	.84142125496061703771	4.9239588433622998309	.00030066000000000001145
ENSDART00000057381	110.631	103.318	29.2369	76.6291	1316.01	46.8766	678.129	81.9284	106.055	21.3633	613.449	27.3617	16	ct16-spike	.81412478730818904626	4.4334994589927498865	.00063360999999999994582
ENSDART00000057434	150.976	307.875	50.4913	114.406	59.9715	109.763	214.175	183.736	45.7744	31.4608	35.8245	68.3952	2	ct02-spike	.86159498874123496837	5.3676557658608698986	.0001577899999999999919
ENSDART00000057439	510.627	682.691	900.81	616.49	417.894	460.677	512.887	608.924	1047.42	288.82	339.281	502.591	7	ct07-spike	.9103713452134619688	6.9572281047150399402	.000019564000000000001067
ENSDART00000057492	758.66	625.995	969.368	481.295	358.793	366.906	438.691	631.007	999.262	1129.78	354.228	421.482	5	cos_per_28_ph_5	.81702238217672595866	4.4807924820256896936	.00058878999999999995143
ENSDART00000057500	1651.93	1529.91	1334.76	1552.46	1068.68	1019.7	1321.64	1492.07	1504.51	1530.77	606.595	798.697	6	ct06-box2	.90554626307233299087	6.7498064823340095941	.00002521699999999999929
ENSDART00000057527	509.603	590.783	892.99	752.333	585.874	501.855	720.471	762.215	761.184	677.326	559.749	798.965	9	cos_per_20_ph_9	.86988409528704302431	5.5768485902936202336	.00011757000000000000089
ENSDART00000057577	634.177	603.879	89.5483	77.0974	2850.28	61.7101	936.367	185.198	374.648	578.558	1437.9	130.309	16	ct16-spike	.86094748207496396564	5.3520501352984499732	.00016133000000000000205
ENSDART00000057585	604.559	556.062	794.634	393.322	374.12	281.499	302.444	420.717	637.162	474.906	201.558	205.238	7	ct07-rigid	.819214408858650045	4.5172458955015901694	.00055652999999999995875
ENSDART00000057710	50.8943	35.4977	67.9492	55.9259	48.3172	35.5291	46.0492	32.4792	66.5228	99.4422	41.1781	35.9435	10	ct10-spike	.81148100084019303413	4.3912069155938500131	.00067675000000000005117
ENSDART00000057712	126.028	23.2876	26.1795	51.3051	735.977	256.613	182.36	96.6667	79.9257	37.0724	433.922	78.2721	17	ct17-spike	.90061512680226196714	6.5528767928762103878	.000032246999999999998051
ENSDART00000057823	3010.52	3138.7	1387.74	1595.24	1895.13	1579.05	2520.99	2457.96	1649.56	540.493	1298.88	438.708	2	ct02-spike	.84662570527226799211	5.0306687620404799688	.00025681000000000000268
ENSDART00000057879	2019.26	2207.74	2166.74	2292.77	949.701	1891.19	2750.4	1971.52	2967.4	2487.19	1051.12	687.183	6	ct06-box2	.83657519426397497497	4.828826896723700024	.00034650000000000001979
ENSDART00000057945	1281.47	2369.86	4192.45	1890.95	1931.59	1255.83	2187.86	3449.64	5644.46	5811.17	1901.88	435.442	9	ct09-rigid	.82000607348276599584	4.5305583160078697347	.00054522999999999995514
ENSDART00000057946	407.943	810.883	858.573	461.716	310.846	338.457	489.56	555.547	934.778	743.393	330.482	222.528	7	cos_per_25_ph_7	.92455231694755102279	7.6726197760097099021	.0000084731000000000002414
ENSDART00000057952	27.2188	10.3329	27.0062	24.0166	40.0742	65.625	36.3937	23.0712	53.5962	37.1507	45.0335	88.7497	19	ct19-spike	.84548948642746601934	5.006951744572229579	.00026592999999999999668
ENSDART00000058056	979.728	1089.53	1087.2	565.747	687.602	697.754	718.904	1043.53	1044.69	714.94	406.624	367.077	4	cos_per_26_ph_4	.89638897191733402092	6.394841766603850175	.000039422000000000003046
ENSDART00000058325	251.66	273.536	386.385	218.422	210.353	165.034	190.799	243.835	424.168	172.763	90.9172	83.8235	7	ct07-spike	.87956495999229200589	5.8460539515496803276	.000081237999999999997063
ENSDART00000058327	2379.83	2405.04	2653.51	2314.61	1991.94	1552.85	1810.1	2034.4	2453.27	2112.46	1055.82	1010.45	7	ct07-rigid	.8148932991220290134	4.4459454294158495813	.00062147000000000005189
ENSDART00000058339	765.195	449.199	1197.48	922.276	686.86	636.048	632.279	778.267	1214.42	498.09	845.828	507.152	8	ct08-spike	.82484734242323498599	4.6137275415078100593	.00047987000000000002526
ENSDART00000058346	3241.56	3487.63	4675.23	1742.62	1742.36	1704.36	2575.33	3991.49	5327.14	5560.09	1067.18	930.282	5	cos_per_27_ph_5	.85541615905801204889	5.222721931734549905	.00019416999999999999256
ENSDART00000058370	323.576	228.564	128.04	223.477	774.877	1083.1	436.351	339.679	146.101	468.527	1062.33	610.443	18	ct18-spike	.88207318341836205011	5.9207957315243096019	.000073443999999999996808
ENSDART00000058385	504.001	822.787	1123.52	575.659	463.416	562.294	525.116	800.556	872.059	539.054	335.217	429.042	6	ct06-spike	.89636509770668504338	6.39397508820862992	.000039465999999999997882
ENSDART00000058401	52.2084	53.8718	34.3716	39.8753	210.025	97.6527	59.6776	54.0215	82.183	57.5703	129.263	87.3087	17	ct17-spike	.90590705273983496149	6.7647888606745896212	.000024754000000000000504
ENSDART00000058407	4295.08	6106.9	6292.56	3422.87	962.807	3815.57	6354.56	8309.24	4595.94	2215.26	1725.91	3510.35	5	cos_per_22_ph_5	.94934685931726003894	9.5538224811405001446	.0000012056999999999999504
ENSDART00000058426	242.691	321.909	530.499	308.297	247.606	406.928	254.378	239.558	422.946	211.853	252.98	238.331	8	ct08-spike	.81278901131651204448	4.4120306932966499858	.00065514000000000001921
ENSDART00000058460	164.442	165.464	332.951	202.114	174.867	175.069	174.906	218.994	301.878	302.721	206.342	200.254	9	ct09-spike	.87261185495662896283	5.6497953619433998185	.00010626000000000000245
ENSDART00000058472	1296.64	1487.49	1953.48	1161.04	942.821	1433.89	1473.4	1309.88	1723.24	761.351	958.322	1557.52	2	ct02-box2	.82402367492207095889	4.5993592388510196045	.00049054000000000002983
ENSDART00000058484	127.695	88.8484	44.951	151.224	355.692	209.617	84.6902	88.2228	126.117	20.8813	213.647	115.688	17	ct17-spike	.82921825287914996405	4.6915393580852597921	.00042621999999999999513
ENSDART00000058491	1314.95	2418.33	1417.89	1812.83	1384.38	1378.5	2562.1	3051.32	1098.5	1123.28	1246.03	1771.21	3	ct03-spike	.81447778865189102149	4.4392076582612203239	.00062801000000000002654
ENSDART00000058505	188.41	341.505	205.197	299.206	144.211	187.148	203.219	235.184	276.279	269.579	132.736	142.616	8	ct08-box1	.82144719488569295507	4.5549962057624799883	.0005251000000000000242
ENSDART00000058587	6937.86	4132.8	1685	1314.19	1299.43	2046.92	4157.45	1261.47	2617.23	1271.58	947.904	1190.67	1	ct01-spike	.84716605861802796174	5.0420328525568098854	.00025255999999999998069
ENSDART00000058605	886.466	838.061	1111.44	978.164	2358.27	833.641	1150.98	938.987	927.23	195.436	1791.37	830.356	16	ct16-spike	.87018324253154699655	5.5847438225569003833	.00011628000000000000478
ENSDART00000058729	1804.6	2110.44	2316.89	1695.37	1349.47	1568.45	1932.24	1964.96	2091.45	1360.39	1126.51	1290.63	5	ct05-box1	.92365321230681896036	7.6216705024515896127	.0000089763000000000007768
ENSDART00000058785	383.257	458.925	161.929	252.347	258.565	232.577	452.151	334.703	263.378	51.5493	59.9841	281.638	0	cos_per_25_ph_0	.81499527878155497707	4.4476022095915404009	.00061987999999999995361
ENSDART00000058973	36.254	57.0314	49.6965	32.6662	27.3627	42.6398	50.6116	65.7946	36.8613	42.8214	29.7738	32.1452	4	ct04-rigid	.84765468399275101241	5.0523567589383802101	.00024875999999999999675
ENSDART00000059140	3759.12	6674.57	7852.59	5817.34	3508.33	4650.26	4220.33	6031.46	6289.41	5287.73	1810.56	5340.41	8	cos_per_21_ph_8	.84053545541620000581	4.9062748651909302566	.00030865999999999998906
ENSDART00000059171	45.8326	30.2435	21.1041	115.707	463.477	123.355	196.695	181.868	91.4309	54.0024	280.102	79.0997	16	ct16-spike	.84876431818017694653	5.0759718400617801493	.00024030000000000001337
ENSDART00000059207	445.247	537.638	97.2078	431.591	234.086	289.094	459.586	498.373	78.3831	127.79	167.674	239.837	2	ct02-spike	.81881304332216697794	4.5105266895470501609	.00056232999999999999131
ENSDART00000059226	746.114	2319.23	1433.51	719.468	536.253	401.005	793.215	876.683	1421.9	596.683	140.363	341.964	6	ct06-sine	.82057950893000697334	4.540250575420110124	.00053715000000000001894
ENSDART00000059250	553.638	218.38	51.1699	379.589	205.098	413.112	509.021	262.751	134.73	85.4567	160.762	226.416	23	ct23-spike	.8200999542993460123	4.5321422385948597622	.00054390000000000004749
ENSDART00000059307	100.148	59.4542	31.3035	42.0885	59.6411	45.0019	121.548	52.6001	41.6839	37.7717	44.5056	96.999	23	ct23-spike	.86498628308202096804	5.4510787070476700578	.00014020999999999998742
ENSDART00000059322	176.412	132.728	111.128	75.9047	125.74	146.249	199.089	119.108	102.29	79.4404	76.2914	89.7984	0	ct00-rigid	.84434268489695796234	4.9832556612061003065	.00027538999999999997726
ENSDART00000059341	380.508	447.27	1092.63	517.686	342.543	380.112	489.062	603.327	1083.6	1364.78	206.285	442.325	10	ct10-spike	.81958458871199801887	4.5234609150643096953	.00055122000000000005195
ENSDART00000059352	284.63	206.343	421.009	266.578	232.806	236.047	246.915	281.53	468.409	392.068	169.386	192.271	9	ct09-spike	.88260776714618704997	5.9370149203725697262	.000071860999999999995193
ENSDART00000059366	418.043	93.9797	53.583	46.1168	1301.67	32.999	114.916	75.0918	138.536	66.7152	1124.82	544.679	16	ct16-spike	.92919382504026404312	7.9502871800544001601	.0000062176000000000004064
ENSDART00000059400	139.106	101.394	265.543	206.098	130.221	97.2791	103.6	117.867	226.403	115.198	70.2614	89.2794	9	ct09-spike	.89012749568934201871	6.1767803065477497881	.000052292000000000000103
ENSDART00000059443	1346.41	466.409	471.366	687.92	654.83	539.149	1284.74	761.516	873.538	420.259	365.918	301.857	0	ct00-spike	.87120169015584303374	5.6118147566574103635	.0001119900000000000035
ENSDART00000059462	14.4411	15.319	9.747	45.1391	16.4229	17.8689	8.871	15.2902	12.356	50.3998	14.1571	26.484	12	ct12-spike	.94120452659939302098	8.810010251416290572	.0000025054999999999999824
ENSDART00000059476	298.848	231.653	544.211	385.569	246.164	205.648	281.536	391.903	465.372	411.144	131.766	147.447	9	cos_per_22_ph_9	.87047653387802803593	5.5925091973273897139	.00011503999999999999632
ENSDART00000059650	237.006	150.908	92.182	137.255	135.517	129.318	222.162	177.68	58.6153	88.9871	98.4535	118.441	1	ct01-spike	.89580019219352702287	6.3735502007850701744	.00004051399999999999869
ENSDART00000059786	299.863	170.492	36.9014	291.332	1927.6	193.804	670.788	388.097	271.721	207.038	749.246	272.786	16	ct16-spike	.81502877943125195959	4.4481467357366799575	.00061934999999999995699
ENSDART00000059795	30.862	18.5718	21.6809	22.9988	84.5748	65.9137	18.3556	24.0491	44.6864	66.2036	68.0632	101.071	18	ct18-spike	.83646862761010998266	4.8267783878223502469	.00034756000000000001303
ENSDART00000059800	1020.16	961.402	1672.73	1343.42	1007.63	889.606	1374.95	1564.78	1602.24	780.974	756.175	1321.53	9	cos_per_20_ph_9	.8991346543921620027	6.4964465073393800054	.000034632999999999998584
ENSDART00000059905	982.244	956.589	223.766	800.094	263.165	666.986	1013.85	916.542	177.685	59.9669	230.58	348.316	2	ct02-spike	.83133635025831398302	4.7302268142011500984	.00040194999999999998525
ENSDART00000059939	442.755	351.873	155.044	226.984	1803.41	153.191	560.418	355.485	309.415	53.869	741.987	167.377	16	ct16-spike	.8243068994727199561	4.6042895899640896573	.00048684999999999998893
ENSDART00000059984	3321.63	4231.37	3416.89	2985.61	1025.89	2459.6	3495.22	3136.61	5235	2307.77	1211.06	1231.46	5	cos_per_25_ph_5	.86597978783935303237	5.4760718462322799382	.00013536999999999999988
ENSDART00000060004	200.757	397.177	707.91	339.559	321.828	408.829	316.822	424.474	733.736	222.28	363.981	297.527	7	ct07-spike	.93891467300251496564	8.6273680538762196335	.0000030211000000000001789
ENSDART00000060030	65.6799	66.9918	161.677	53.2637	63.965	79.8913	74.445	86.4437	107.24	90.825	76.3049	56.3319	8	ct08-spike	.83598922823174404151	4.8175854999085903074	.00035239000000000000575
ENSDART00000060037	769.84	912.235	2968.88	1311.63	1047.51	1388.25	755.95	1866.77	2983.62	2400.62	1168.8	1594.71	9	ct09-spike	.86792682833058598657	5.5258091274258900327	.00012625000000000000588
ENSDART00000060186	29.5012	26.3353	28.7512	48.0987	28.2603	125.123	31.9234	30.5389	28.0458	62.5565	116.123	123.058	19	ct19-spike	.84772084555882498691	5.0537581544637202313	.00024824999999999998977
ENSDART00000060193	150.802	65.6281	150.024	178.421	199.821	161.764	121.634	120.174	139.437	187.29	102.667	64.591	15	cos_per_20_ph_15	.81576722466573503567	4.4601834203533901047	.00060789000000000003622
ENSDART00000060245	1061.6	901.901	1727.06	1312.73	4636.76	1200.37	1878.18	1442.27	1282.19	311.628	2673.51	1006.32	16	ct16-spike	.85446144230670595388	5.2010919600916096783	.00020033000000000000134
ENSDART00000060302	1026.32	2842.75	1427.32	857.49	616.68	1104.27	1596.82	3276	2473.72	755.998	1160.09	958.814	5	ct05-spike	.91533371192528401039	7.1878990897280097272	.000014841999999999999521
ENSDART00000060304	1244.63	1690.48	1651.79	2151.32	1043.09	1293.5	1713.49	2335.87	1869.24	496.549	1074	1846.83	8	cos_per_20_ph_8	.83607253220022703655	4.8191802867252704345	.00035155000000000000701
ENSDART00000060319	1052.1	1586.71	2124.44	1394.95	1325.36	1110.31	1109.33	1437.71	1871	883.146	818.627	961.934	7	ct07-spike	.89513193284638903346	6.3495901542722101851	.000041780999999999998587
ENSDART00000060336	24.8386	53.1525	29.9485	41.706	167.715	23.2488	63.4364	48.9957	47.5643	119.273	170.141	83.3856	15	ct15-spike	.89301277480400897968	6.2750174420676900766	.000046007000000000001832
ENSDART00000060351	200.5	260.383	251.379	191.771	108.549	99.7723	195.239	186.215	262.109	139.16	90.0945	76.6895	6	ct06-box1	.92225523031034994936	7.5441447141278503707	.0000098052000000000005825
ENSDART00000060404	700.473	919.517	1776.92	1009.74	369.905	934.87	1143.68	1585.85	1511.8	702.264	533.774	1299.84	8	cos_per_20_ph_8	.88713434239079902444	6.0786491120549097644	.000059502000000000000528
ENSDART00000060432	832.708	1190.77	1679.99	1150.98	1220.13	1152.36	1129.3	1191.82	1457.17	842.064	791.459	749.053	7	ct07-spike	.81030596604523097426	4.3726650279005303545	.00069663999999999999795
ENSDART00000060447	132.824	221.987	262.552	162.023	87.3563	101.535	130.075	131.281	206.053	111.263	52.8898	31.7476	7	ct07-rigid	.87047963341829004413	5.5925913938517597401	.00011502000000000000667
ENSDART00000060547	563.071	568.991	669.592	567.502	538.399	420.279	512.512	677.884	994.585	769.568	399.731	275.506	8	ct08-rigid	.84660560689376695986	5.0302471386441398593	.00025696999999999997405
ENSDART00000060592	2317.45	2628.41	2990.04	1691.45	1807.33	1716.83	2204.14	2450.2	2777.83	2379.7	886.745	614.677	5	cos_per_25_ph_5	.86494591562871303569	5.4500686155280302359	.00014040999999999999228
ENSDART00000060633	428.944	598.766	368.2	459.286	239.976	320.005	375.172	404.639	570.484	411.002	266.805	178.791	5	cos_per_26_ph_5	.84510384875660604642	4.9989565132400901604	.00026907999999999999193
ENSDART00000060689	851.294	1392.07	1760.43	885.716	915.747	573.649	1051.8	1349.54	1565.71	1336	466.963	825.062	7	cos_per_23_ph_7	.89909433217624801227	6.4949260490548796909	.000034700000000000003194
ENSDART00000060713	46.9747	23.2811	25.8169	24.8331	78.0108	67.2043	50.4778	56.0516	30.8046	37.1054	54.0213	114.418	19	cos_per_26_ph_19	.81371674480597500079	4.4269193761951397548	.00064013000000000003925
ENSDART00000060744	17.0103	32.0201	18.0027	55.3609	110.893	182.74	45.2945	22.1859	18.4659	52.1831	25.9989	97.6392	19	ct19-spike	.82212167392455803849	4.5665255709135097462	.00051586999999999997874
ENSDART00000060822	13061.2	11731.4	11591.2	8806.73	3953.82	7607.26	6883.47	8915.04	12134.4	13760.1	6556.38	2983.77	4	cos_per_28_ph_4	.8760422910051020029	5.7446951821493996704	.000093257999999999993787
ENSDART00000060840	362.715	475.489	837.664	559.519	438.044	428.036	448.763	443.579	675.87	960.727	263.132	201.004	10	ct10-spike	.83538224509773395532	4.8059986051783800676	.00035857000000000000418
ENSDART00000060880	29.474	45.8071	22.2098	44.8518	35.4448	110.369	18.5135	27.5728	23.1626	20.6892	52.2524	97.787	19	ct19-spike	.93899703960859803864	8.6337644212396096322	.0000030012000000000001662
ENSDART00000060915	38.2908	79.5313	23.9642	96.8799	3482.96	26.2596	179.667	22.4499	37.0879	48.0903	2414.6	31.2899	16	ct16-spike	.97937836464041605478	15.329378399935199795	.000000014186000000000000436
ENSDART00000060971	722.609	644.904	1031.35	701.696	643.292	607.216	824.601	1253.19	884.847	372.926	450.233	801.077	8	cos_per_20_ph_8	.83096965679343703925	4.7234818989439002479	.00040607000000000002034
ENSDART00000061016	660.809	678.544	1134.35	740.442	597.318	528.449	650.78	658.934	1256.72	775.511	424.144	263.581	9	ct09-spike	.8974463575370299484	6.4335132651052395758	.000037519999999999999912
ENSDART00000061086	218.266	276.265	143.987	1051.43	80.8317	1154.3	454.904	238.953	146.036	122.863	144.91	1765.49	20	ct20-spike	.842448613693646986	4.9446392673398396056	.00029157000000000000191
ENSDART00000061106	1120.96	1633.13	298.253	162.931	284.496	134.505	1453.48	638.306	238.209	203.594	90.034	152.128	2	ct02-spike	.90459026581531298827	6.7104985509961299073	.000026474999999999999781
ENSDART00000061125	38.7556	27.1291	14.1198	58.4048	49.278	19.284	20.5536	24.6153	32.051	53.8077	73.5233	45.9614	14	ct14-spike	.83337144910900096129	4.7680266815858098894	.00037964999999999998531
ENSDART00000061144	619.215	890.721	757.474	546.659	507.042	468.455	732.292	585.498	603.336	465.457	379.997	510.378	5	cos_per_23_ph_5	.83050813373423504338	4.7150209614219500409	.00041131000000000001761
ENSDART00000061164	311.94	251.965	294.688	218.546	1041.18	603.684	322.725	255.793	345.768	88.5678	964.074	168.162	17	ct17-spike	.91395996417275104928	7.1221391769477797595	.000016047000000000000689
ENSDART00000061247	8288.42	4774.61	3869.27	5234.06	2704.89	6118.63	6678.97	4422.54	4748.62	1702.05	3153.72	6998.91	22	ct22-spike	.82421514396052697471	4.6026911380853299249	.00048804000000000002327
ENSDART00000061256	4500.77	3647.33	3180.89	3005.68	1330.35	3031.07	4823.72	3224.46	3573.34	4400.05	1767.25	2808.55	5	ct05-box2	.84058863487074797494	4.9073327310954999447	.00030818000000000002076
ENSDART00000061417	242.604	278.87	449.639	442.255	345.869	198.493	323.469	363.874	595.113	187.056	99.4325	402.887	10	cos_per_20_ph_10	.82392338059844705267	4.5976159008409602791	.00049184999999999994783
ENSDART00000061473	487.805	382.204	220.35	468.171	533.914	490.879	665.001	481.547	365.923	167.548	332.357	644.998	21	cos_per_28_ph_21	.84673920151743697904	5.0330511111428597459	.00025590999999999998081
ENSDART00000061617	367.691	378.918	566.54	403.981	309.354	314.422	338.195	427.112	733.407	493.109	211.887	120.042	8	ct08-rigid	.87316116367206098037	5.6647495555770399633	.00010409000000000000121
ENSDART00000061736	1188.18	1366.45	1808.57	1209.18	379.96	529.116	1255.02	1447.43	1796.72	1117.21	399.553	510.454	6	ct06-box1	.95459793662411296378	10.133371812472599771	.00000070380000000000004206
ENSDART00000061989	563.475	1448.2	212.933	701.712	693.283	331.054	731.16	1111.73	242.496	134.043	305.601	222.411	3	ct03-spike	.87897944372061898033	5.8289204947499095866	.000083146999999999995218
ENSDART00000062066	838.933	1244.32	990.057	490.134	459.839	537.702	977.544	771.33	640.205	248.621	239.383	444.05	4	cos_per_23_ph_4	.88560621167127995257	6.0299530774065503991	.00006347200000000000487
ENSDART00000062069	510.705	1964.99	4500.1	3548.56	638.788	971.225	1299.72	4278.03	2005.04	392.608	752.96	631.247	9	cos_per_20_ph_9	.87771876850724594998	5.7924222028288099295	.000087375999999999998265
ENSDART00000062096	780.89	796.051	1354.52	664.753	365.017	441.545	661.198	845.849	1391.1	1311.26	439.903	606.258	7	cos_per_25_ph_7	.82997613846041595753	4.7053069033560603884	.00041741000000000000325
ENSDART00000062135	815.115	952.654	2214.34	1837.13	1036.34	1143.89	1255.72	1735.63	2773.07	1868.61	1238.52	52.0571	10	cos_per_22_ph_10	.86431154566320400612	5.4342501019426503461	.00014358000000000000428
ENSDART00000062335	889.082	848.55	1259.34	1176.46	688.347	835.683	820.121	849.113	1111.28	1465.88	908.159	704.212	10	ct10-spike	.90150798078593996632	6.5874901513338999237	.00003087199999999999851
ENSDART00000062336	932.032	1223.39	1361.3	881.248	698.102	938.886	975.809	1007.26	1262.29	837.417	632.831	268.469	6	ct06-sine	.82726669749885595184	4.6564670474363101249	.00044956999999999999349
ENSDART00000062343	5756.99	6053.32	1048.83	3228.45	1980.77	2698.06	7661.06	3068.46	1149.04	427.588	2018.35	1840.27	1	ct01-spike	.86438015878628404742	5.4359560581023300685	.0001432399999999999906
ENSDART00000062359	48.6329	74.6376	60.47	100.414	66.7637	162.222	29.4826	62.345	49.6865	56.4287	82.0007	192.302	20	ct20-spike	.92041239005842501175	7.4449618254331504374	.000010988999999999999311
ENSDART00000062365	995.257	1423.27	1600.21	1624.18	1175.78	887.335	815.225	769.874	1409.48	1431.59	940.445	611.085	9	cos_per_25_ph_9	.85377967308550795078	5.1857655427620104049	.00020482000000000000748
ENSDART00000062421	112.762	169.744	164.778	172.715	132.851	145.701	128.093	203.161	278.317	157.734	100.923	89.7879	9	cos_per_22_ph_9	.81009473060835501812	4.3693481172803201318	.00070025999999999996668
ENSDART00000062441	382.668	305.304	538.165	396.196	320.505	313.736	376.437	335.408	636.824	546.434	252.088	215.902	9	ct09-spike	.86026256419387103769	5.3356522428052697293	.00016514000000000000792
ENSDART00000062514	500.079	556.389	1008.48	608.076	446.81	513.67	442.477	555.049	892.698	648.505	472.818	642.312	9	ct09-spike	.93860106883268001887	8.6031286039173693325	.0000030977999999999998003
ENSDART00000062560	34.8649	11.9957	27.7038	23.115	29.5381	50.2527	12.3201	20.5095	16.7844	17.2216	40.5983	44.4157	19	ct19-spike	.82995318631456205249	4.7048887356801900594	.00041766999999999997704
ENSDART00000062569	1620.74	1170.89	1826.4	1202.78	485.566	667.37	1437.77	1329.25	1536.74	455.49	632.718	665.375	4	ct04-box1	.86882625474033003954	5.549131460664259663	.00012219999999999998875
ENSDART00000062587	1100.52	859.388	1101.13	1123.59	812.098	2049.57	1169.99	845.534	914.532	208.976	686.218	1467.46	21	ct21-spike	.81171668974678401476	4.3949447567583304064	.0006728199999999999719
ENSDART00000062591	428.683	523.365	568.54	466.014	386.482	340.655	486.193	533.808	738.176	572.904	381.803	116.891	8	ct08-rigid	.88119580900630700704	5.8943991431488598209	.000076100999999999995255
ENSDART00000062702	1242.4	1949.71	3454.19	1691.52	1043.68	1309.12	1272.06	1925.35	2081.68	1588.27	917.433	187.619	7	ct07-rigid	.85464514904097799164	5.2052387341244399366	.0001991399999999999941
ENSDART00000062724	262.653	442.119	670.802	480.771	385.633	279.127	248.994	355.5	614.418	210.111	127.082	366.899	7	ct07-spike	.82376343536489105013	4.5948384800568398134	.00049395000000000005309
ENSDART00000062749	21.2403	68.6943	58.8201	57.6467	493.711	208.601	37.2808	41.9777	21.1364	120.18	448.011	59.504	17	ct17-spike	.95723847428227504253	10.463372282019099302	.00000052394000000000001837
ENSDART00000062815	13.1502	19.4288	16.8869	33.1764	14.7249	12.193	13.6089	19.5433	12.9465	86.8885	11.4787	13.0606	12	ct12-spike	.83230145766416296915	4.7480747536143903531	.00039124999999999999622
ENSDART00000062854	2367.57	3482.31	4716.66	2607.06	2324.65	2391.42	2788.34	3128.04	4028.55	3572.19	1202.2	1282.64	7	ct07-rigid	.87594437729030405482	5.741935690499049727	.00009361099999999999532
ENSDART00000062890	121.792	152.681	301.853	182.784	143.782	183.527	242.577	251.381	335.286	170.566	113.346	183.578	7	ct07-spike	.81783491110856099127	4.4942357551864500209	.00057667000000000004714
ENSDART00000062952	854.154	600.914	707.171	477.15	353.164	726.707	578.73	609.756	822.732	455.119	229.188	595.643	3	ct03-box2	.85169968662530004533	5.1396101314224598156	.00021900000000000001063
ENSDART00000063037	89.5406	91.4504	52.058	141.632	105.319	161.7	132.997	102.715	46.5383	105.59	137.005	102.472	19	ct19-box2	.8149996437799319482	4.4476731516068301886	.00061981000000000004407
ENSDART00000063058	3367.81	2079.77	5458.18	4268.03	1477	1155.62	3574.23	5531.4	6345.36	2619.15	1916.54	271.465	7	ct07-rigid	.85429714054958505454	5.1973893351371502902	.00020141000000000001133
ENSDART00000063064	581.391	624.693	230.127	453.726	60.7081	138.295	716.324	926.501	462.325	43.0792	33.4974	140.428	3	ct03-rigid	.85527354822958001623	5.2194784253027899368	.00019508000000000000926
ENSDART00000063100	3215.87	3207.63	4817.98	5704.99	2031.28	3465.86	3848.57	5065.07	4859.92	2951.32	1752.62	3076.03	10	cos_per_20_ph_10	.82999299690076799862	4.7056140980691498754	.00041721999999999999321
ENSDART00000063107	304.191	471.652	764.875	431.298	136.101	155.429	209.041	411.217	574.75	61.3745	51.7353	47.1052	7	cos_per_23_ph_7	.87272887005998800447	5.6529733752669804048	.00010579000000000000187
ENSDART00000063140	66.2092	30.3638	112.763	523.926	409.8	529.927	65.8744	54.0391	34.3247	204.673	377.044	137.613	16	ct16-sine	.81989434848574405112	4.5286747875366302196	.00054681000000000000438
ENSDART00000063244	27.3348	30.6681	40.7786	44.9063	66.3299	89.6505	34.1746	40.4844	48.3289	47.1477	107.338	132.369	18	ct18-spike	.88030412122168499867	5.8678511331741800561	.000078876999999999997137
ENSDART00000063320	164.197	41.5178	36.2185	82.1374	706.489	243.537	50.085	30.4359	26.2867	132.844	311.479	21.8484	16	ct16-spike	.8386923189144299684	4.8699063617296003414	.00032584999999999997864
ENSDART00000063398	51.6494	37.549	58.8273	17.0969	104.525	66.1229	45.5468	36.2689	44.5937	61.9709	83.2217	42.6759	17	ct17-spike	.81268729355033597628	4.4104043198956901506	.00065680000000000002703
ENSDART00000063432	660.882	1046.33	1138.99	675.849	717.748	732.873	568.513	758.662	1125.9	458.008	516.914	468.336	7	ct07-spike	.87314242582577294982	5.6642379518214198697	.00010416000000000000562
ENSDART00000063437	520.968	424.508	503.817	391.413	285.399	303.433	404.238	459.355	635.842	366.359	187.713	316.276	5	ct05-box1	.84294492441419599515	4.9546962335632196428	.00028726000000000001099
ENSDART00000063467	1307.37	2013.15	2776.21	2887.42	2007.29	1187.42	1223.12	2446.73	3772.24	4263.96	2141.76	2577.01	11	ct11-rigid	.82474487283245501157	4.6119350468160797973	.0004811899999999999923
ENSDART00000063478	511.892	253.571	61.2626	2542.41	4844.77	2018.88	213.239	151.504	333.466	182.141	4050.55	164.873	15	ct15-spike	.89417280362065998389	6.3155766858194901658	.000043653999999999999119
ENSDART00000063490	397.671	529.359	824.271	565.475	502.69	605.264	502.575	413.467	727.402	704.432	438.885	484.904	9	ct09-spike	.86060801343192394608	5.3439088064892903418	.00016321000000000000438
ENSDART00000063518	287.693	235.815	204.603	200.705	128.184	116.749	212.356	255.085	152.279	132.375	80.7838	104.56	3	cos_per_25_ph_3	.82297739743716702421	4.581238534233549764	.00050434999999999998062
ENSDART00000063539	187.971	319.526	209.869	206.97	97.8977	132.471	220.083	179.987	281.129	74.8765	84.4085	81.313	5	ct05-sine	.82277749824867596473	4.5777929401878196813	.00050703000000000000239
ENSDART00000063556	42.6696	32.8498	41.1991	54.851	54.8964	35.8163	33.9302	29.0763	46.49	47.9668	43.6	42.8171	14	cos_per_23_ph_14	.83445515573279305244	4.7884132369478997759	.00036817000000000002068
ENSDART00000063559	109.82	97.34	102.346	56.834	60.4229	68.9771	99.7869	123.825	73.4228	67.8554	89.6404	125.66	4	cos_per_21_ph_4	.83056935997932901383	4.716141594981699825	.00041061000000000000059
ENSDART00000063577	38.8298	41.4725	29.3272	18.2756	116.6	112.97	41.1084	37.722	47.8728	125.503	110.95	81.7995	17	cos_per_22_ph_17	.81124174209794197576	4.3874188777087503865	.00068077000000000002962
ENSDART00000063625	2415.99	2047.69	349.519	3118.88	3815.87	4359.85	2760.14	2976.55	310.065	56.687	1425.84	5666.72	20	cos_per_27_ph_20	.85172226593351896273	5.1401063663433799178	.00021885000000000000698
ENSDART00000063665	274.124	357.077	318.607	319.809	191.661	168.096	264.655	359.911	390.712	57.0475	83.1257	317.498	7	cos_per_21_ph_7	.82312278141907202489	4.5837477798677896956	.00050241999999999994997
ENSDART00000063704	1718.27	2172.18	1959.47	1736.6	655.602	1059.48	1581.84	2073.86	2152.4	422.829	832.842	1778.49	6	cos_per_22_ph_6	.87540729776286896335	5.726853313916580035	.00009556499999999999728
ENSDART00000063761	944.865	1235.37	312.141	789.952	386.817	590.158	911.387	993.953	269.224	113.376	403.158	379.01	2	ct02-spike	.85877261441028795996	5.3003627632585104124	.00017368000000000000408
ENSDART00000063764	199.566	199.134	605.076	267.558	251.15	104.391	257.766	266.242	531.416	751.962	104.413	222.202	10	ct10-spike	.81659870568719594708	4.4738146659886304235	.00059517999999999994954
ENSDART00000063772	570.506	409.924	144.12	242.983	238.298	311.908	431.969	250.915	176.792	134.727	101.804	197.212	1	ct01-spike	.85755541129127599298	5.2719140973680795881	.00018091000000000000093
ENSDART00000063783	41.3505	48.5754	52.1551	44.8383	58.6092	181.653	43.9491	82.1976	26.3067	97.2294	149.306	136.078	19	ct19-spike	.81498158071470705455	4.4473795967790197281	.0006200900000000000075
ENSDART00000063817	347.785	532.427	582.042	217.516	221.42	142.606	258.327	245.542	364.463	313.447	47.3959	49.7688	6	cos_per_25_ph_6	.82077305381054799227	4.5435313474414202872	.00053443999999999995849
ENSDART00000063857	631.728	935.964	1097.64	709.119	323.634	468.625	646.978	644.682	791.603	407.284	204.233	84.1113	6	ct06-box1	.86103742256349302675	5.3542117624062601777	.0001608299999999999899
ENSDART00000063943	1157.28	1099.11	1326.62	817.957	801.193	624.386	942.652	1221.27	1548.07	1565.58	520.008	103.192	6	cos_per_26_ph_6	.85062513602986500327	5.1161141080799996672	.00022661999999999999527
ENSDART00000063953	634.068	1368.48	1692.5	559.125	425.585	572.628	1145.2	1652.56	1575.15	934.86	547.232	202.068	6	ct06-sine	.92082676656376505342	7.4669740915257802882	.000010713000000000000598
ENSDART00000063959	73.263	72.4874	41.0807	55.393	55.973	100.563	42.6814	50.2114	44.4639	68.3294	62.5132	104.98	20	ct20-spike	.85221092755633498506	5.1508715042315396104	.00021545000000000000566
ENSDART00000064003	507.049	849.57	121.811	101.118	5177.84	95.2755	2169.78	623.446	582.555	137.262	2474.23	180.164	16	ct16-spike	.84413838299968702028	4.9790593809425001126	.0002771000000000000134
ENSDART00000064033	132.852	210.288	37.0634	114.231	86.4784	116.362	210.665	173.465	90.2407	57.1026	122.848	73.7319	2	ct02-spike	.83235138643699302374	4.7490019029330001743	.00039071000000000000478
ENSDART00000064040	1655.72	1893.29	2801.99	2038.56	713.846	1479.57	2161.46	2956.6	3042.61	2868.86	597.311	1942.59	5	ct05-box2	.83659769942943396082	4.8292597423555498892	.00034626999999999997625
ENSDART00000064061	876.869	1779.94	2664.66	1257.44	568.34	1265.85	1592.98	2478.01	1567.13	660.778	233.541	914.069	7	cos_per_21_ph_7	.91508998363343296845	7.1761209014859801414	.000015049999999999999901
ENSDART00000064111	1195.88	800.187	2179.41	1185.11	970.888	664.686	841.294	1118.21	1740.38	2134.67	438.164	967.038	10	ct10-spike	.82936085878384502301	4.6941235438505897193	.00042454999999999999249
ENSDART00000064112	958.725	777.802	1208.75	630.33	490.373	511.313	685.443	750.837	1156.26	556.956	329.152	462.696	5	ct05-box1	.84672706605251202294	5.0327962651605302469	.00025600999999999998324
ENSDART00000064144	3156.97	2450.76	2660.84	1719.83	1616.7	1985.5	2831.83	2291.02	2377.12	1870.14	1133.04	1821.89	3	ct03-box1	.87738051106085102049	5.7827188772663298266	.000088539000000000000513
ENSDART00000064150	344.27	251.255	629.613	367.1	367.816	251.31	341.647	488.543	640.134	353.036	181.554	434.391	8	ct08-spike	.81623726461617995831	4.4678790083122299492	.00060068000000000002902
ENSDART00000064283	21.4066	22.3238	11.0625	25.1209	38.3416	29.7544	21.2419	11.6672	10.7649	51.4475	43.201	40.2321	17	ct17-box1	.8369920212480409516	4.8368570451315102687	.00034235999999999999505
ENSDART00000064312	43.8299	30.1121	27.8427	26.9581	81.7082	64.8274	47.1729	25.4107	36.2753	74.3399	70.0869	64.0182	18	cos_per_22_ph_18	.88226820091550595127	5.9267005323273398432	.000072863999999999998973
ENSDART00000064339	21.2506	49.7122	33.9381	17.8151	139.87	176.032	40.4964	20.7093	17.7655	18.3554	381.211	19.3676	17	ct17-spike	.82060694026294300762	4.5407152717781498197	.00053675999999999994983
ENSDART00000064376	8945.66	8778.95	11809.9	9120.57	7686.42	7746.48	7849	9549.77	13180.1	13060.8	7658.62	4745.11	8	cos_per_25_ph_8	.84889877940154601088	5.0788496316588895851	.00023929999999999998907
ENSDART00000064406	250.842	273.936	225.625	192.271	136.053	127.503	225.587	242.302	287.715	271.947	98.6209	147.844	6	ct06-box2	.9054180580851129978	6.7445021951649604119	.00002538300000000000075
ENSDART00000064436	1062.87	2091.67	1628.81	950.681	1056.68	907.224	1038.9	1129.02	1592.74	1915.73	1307.47	394.95	6	cos_per_27_ph_6	.8238811669105650104	4.5968825355891400619	.00049240999999999998313
ENSDART00000064447	80.5737	116.986	112.892	115.859	74.1041	66.817	112.067	100.902	189.659	114.409	59.3233	39.0909	7	ct07-rigid	.83615950616761003378	4.8208465144712597805	.00035066999999999997478
ENSDART00000064496	104.46	286.276	192.639	154.265	88.5647	86.656	154.748	162.912	172.464	90.5651	62.4311	138.491	6	cos_per_22_ph_6	.84630581696723905516	5.0239671561997800708	.00025934999999999998853
ENSDART00000064586	1494.36	1655.98	2001.91	2053.8	618.318	994.884	1297.36	2697.33	2285.07	756.209	665.605	1175.43	7	cos_per_22_ph_7	.88517304061034896012	6.0163159539093795658	.000064634000000000004925
ENSDART00000064609	362.661	200.159	407.208	742.02	645.547	451.895	417.293	526.195	1026.49	685.689	530.294	175.52	13	cos_per_20_ph_13	.88159704627625301576	5.9064366032260595674	.000074876999999999994777
ENSDART00000064612	461.609	618.564	846.653	479.195	311.047	397.309	498.887	526.036	727.775	600.287	284.645	462.267	7	cos_per_23_ph_7	.84768900367791899519	5.0530835938164395671	.00024850000000000002295
ENSDART00000064613	1648	1163.59	56.0679	689.553	114.846	498.833	2289.59	356.626	64.0297	67.0639	115.811	488.058	1	ct01-spike	.90859205335360304634	6.8789222668526903703	.000021517999999999999638
ENSDART00000064694	570.218	652.022	1195.88	557.505	573.908	448.66	665.043	967.105	1352.63	628.929	336.918	398.084	7	ct07-spike	.9250992766400739642	7.7040442745485497866	.0000081780000000000003054
ENSDART00000064726	2029.2	1812.42	1533.62	1043.99	818.275	745.279	2026.35	2026.54	1404.35	648.55	769.903	931.069	3	ct03-box1	.95385657155365399795	10.045737056188299263	.00000076221000000000004694
ENSDART00000064748	88.8671	212.668	53.2757	133.172	57.3229	107.005	153.279	305.764	77.0052	46.3506	61.0739	140.255	3	ct03-spike	.86007159368254004761	5.3311000111884503383	.00016621999999999999081
ENSDART00000064789	6095.33	5010.59	6160.68	5256.66	3237.1	3313.58	5446.86	5126.54	3444.11	4597.96	1758.09	1865.29	6	ct06-box2	.84189281971114704461	4.9334284206556704433	.00029646000000000001778
ENSDART00000064888	322.797	309.917	598.065	326.289	226.299	167.659	259.663	307.673	505.186	380.072	180.551	189.621	9	ct09-spike	.90533560348404795715	6.7410961736355403673	.000025490000000000001589
ENSDART00000064974	1629.31	2736.48	3785.01	2018.31	2536.79	1664.22	2446.15	1965.85	3631.55	1446.99	1533.74	2721.61	7	ct07-spike	.8242263590070060264	4.6028864521801500231	.00048789999999999998734
ENSDART00000065105	106.868	155.621	76.2767	130.803	97.58	85.799	143.686	189.807	105.296	66.3304	96.6069	92.2298	3	ct03-spike	.85011639814129202897	5.1050712374479303435	.00023029999999999998714
ENSDART00000065127	1770.07	1606.38	2586.43	1803.33	2040.04	1697.01	1554.73	1469.91	2889.38	1654.51	1538.51	2070.47	8	ct08-spike	.89654742225057204585	6.4006009948986504199	.000039131999999999997353
ENSDART00000065131	57.1054	126.28	20.4575	61.5728	339.384	60.9814	80.3518	35.0271	50.3476	68.7851	221.351	62.757	16	ct16-spike	.9213795200320480383	7.496596411797709969	.000010353999999999999462
ENSDART00000065338	1088.83	1174.91	1242.48	988.437	808.59	687.099	1012.56	1132.23	1387.78	606.179	515.06	804.152	5	ct05-box1	.88365872504299902701	5.9692057648613499055	.00006882799999999999899
ENSDART00000065407	196.082	255.966	135.075	137.047	68.2837	118.085	254.192	242.762	111.847	98.9413	84.6088	131.603	2	ct02-spike	.92915958040870394452	7.9481429553906801644	.000006232299999999999605
ENSDART00000065448	45.444	61.585	86.1452	26.384	11704.5	21.3002	65.5949	86.5309	37.2918	43.9134	9293.39	19.3291	16	ct16-spike	.99209368645157303135	24.998318067239001294	1.2004999999999998869e-10
ENSDART00000065467	1600.13	2327.15	1887.6	459.33	441.682	908.419	1502.03	1263.46	1423.68	688.893	672.145	483.167	4	ct04-sine	.89122000569583303964	6.2135440889673798637	.000049837999999999999543
ENSDART00000065512	59.1867	36.5191	15.7412	26.4135	261.702	28.1647	64.6157	65.9806	37.4521	138.855	156.085	79.0562	15	ct15-spike	.84806513773161495973	5.0610643013725802319	.0002456100000000000015
ENSDART00000065599	119.234	115.671	26.0718	74.0237	61.8137	173.094	115.669	49.6672	22.0321	103.074	76.5617	401.737	21	ct21-spike	.83093731662403702565	4.7228879939202901284	.00040643999999999999139
ENSDART00000065670	9683.28	5542.23	6334.14	4169.45	1494.62	5595.52	6068.18	5330.77	7255.19	2626.94	1455.27	1048.83	1	cos_per_27_ph_1	.81469518994917100585	4.4427304229870099306	.00062458999999999995426
ENSDART00000065674	2076.07	1267.69	1464.16	1825.77	4199.35	1387.52	2622.93	2557.29	2047.07	377.446	3755.97	2090.65	16	ct16-spike	.81322943554417304046	4.419086411660479996	.00064798000000000004032
ENSDART00000065755	200.052	317.244	284.678	202.462	143.412	157.495	184.196	232.206	260.025	94.3559	102.614	274.34	6	cos_per_21_ph_6	.82859476136914100852	4.6802753266045300506	.00043357999999999997888
ENSDART00000065819	80.8046	14.632	88.2529	51.8314	425.603	340.77	63.5711	24.347	27.7927	97.4546	244.383	50.792	17	ct17-spike	.81104945832502195469	4.3843792388428699525	.00068400999999999997827
ENSDART00000065858	1222.12	1439.26	547.556	827.779	291.808	841.15	925.375	945.851	684.427	102.286	107.145	1224.2	1	ct01-box1	.83428675140085895023	4.7852333050268995862	.00036994000000000002576
ENSDART00000065923	179.597	417.517	476.579	146.11	144.531	112.544	182.431	270.935	384.438	236.568	68.7285	84.7142	7	ct07-rigid	.89750897087212000436	6.4358209372815302629	.000037410000000000002659
ENSDART00000065933	451.805	359.589	266.619	180.312	1270.67	371.13	615.739	368.873	421.037	431.524	944.339	356.314	16	ct16-spike	.9142356583994799557	7.1352152036963900628	.000015798999999999998998
ENSDART00000066036	426.651	629.443	1362.9	575.071	429.995	499.817	537.915	519.613	917.611	1099.46	278.925	344.438	9	ct09-spike	.83034415942960504431	4.712022425853869656	.00041318000000000002512
ENSDART00000066064	1345.78	1282.98	1537.73	668.335	699.636	589.519	782.314	1321.38	1414.5	647.617	367.468	338.292	5	ct05-box1	.92192399625005394537	7.5260695325273996303	.000010010000000000000722
ENSDART00000066065	2397.36	2595.84	2949.33	3071.27	3502.74	1905.54	2327.53	3277.01	3569.36	3277.45	2199.26	1762.54	12	cos_per_20_ph_12	.86804524021441098469	5.5288668993368501603	.00012570999999999998733
ENSDART00000066154	350.09	224.919	1042.95	345.908	187.527	311.942	597.853	496.324	1062.68	947.738	155.699	119.674	9	ct09-spike	.8387779759409890179	4.8715839085856798008	.00032504000000000001858
ENSDART00000066182	1315.91	2309.08	2925.53	1205.85	1468.01	1148.43	1968.38	1854.77	2278	1367.27	650.299	1047.81	6	cos_per_23_ph_6	.84771302592621100569	5.053592479921389824	.00024831000000000001291
ENSDART00000066206	553.255	1309.81	529.995	502.79	447.862	614.945	665.279	1015.65	279.674	218.185	285.587	512.412	3	ct03-spike	.90156650883494704463	6.5897746917182402626	.000030784000000000002063
ENSDART00000066305	599.668	544.173	691.956	620.54	424.624	440.819	637.809	738.014	580.869	505.601	350.569	233.51	6	ct06-box2	.84732029588828494671	5.0452867387660598197	.00025136000000000000574
ENSDART00000066307	221.816	329.078	577.49	172.066	193.091	156.591	275.814	286.407	346.51	309.311	125.63	92.4658	7	ct07-rigid	.83076935344806701611	4.719805951258860155	.00040833999999999998336
ENSDART00000066317	2976.37	4175	2217.99	2720.24	1932.66	2515.37	3412.85	2768.02	1474.01	1250.12	1653.05	3222.25	3	cos_per_22_ph_3	.8194737923659459744	4.5215989288105697952	.0005528100000000000418
ENSDART00000066368	591.292	896.014	959.364	757.086	476.78	586.789	718.671	793.556	774.41	510.26	327.315	666.756	7	cos_per_21_ph_7	.91945975589324402399	7.3949756612319701432	.000011643000000000000165
ENSDART00000066382	1626.55	2670.54	2550.06	945.936	454.05	419.935	1769.77	1418.04	1967.75	822.478	170.462	520.879	5	ct05-box1	.92869885412075403597	7.9194394698514898323	.0000064324999999999998227
ENSDART00000066385	167.829	301.712	276.152	61.2373	59.4822	70.6228	107.074	203.205	229.866	161.293	82.7756	97.5653	5	cos_per_26_ph_5	.89145036425090296017	6.2213624993087099924	.000049332000000000001338
ENSDART00000066450	168.01	149.306	148.732	159.633	63.069	122.656	196.898	148.819	158.841	109.269	84.6244	120.956	5	ct05-box2	.84290185901893899256	4.9538218535016600441	.00028762999999999998204
ENSDART00000066583	274.501	141.255	507.81	437.894	203.317	365.189	272.884	367.851	529.682	452.351	226.447	363.284	10	ct10-spike	.81749272345943901907	4.4885644252729601789	.00058175000000000001883
ENSDART00000066622	599.134	1189.75	263.712	753.377	316.329	463.39	647.721	942.145	264.985	177.135	203.665	173.13	3	ct03-spike	.86477419834111002306	5.445776522239279771	.00014127000000000000776
ENSDART00000066631	9660.7	9239.92	6999.17	8649.4	2853.3	5171.4	8975.62	8804.57	6572.03	5032.01	2060.55	8009.63	5	ct05-box2	.82549483554980596089	4.625087081503189701	.00047161000000000001964
ENSDART00000066692	220.136	519.32	475.374	372.447	284.385	245.658	433.673	431.286	506.326	224.748	108.434	220.286	7	cos_per_22_ph_7	.89921856321043103222	6.4996132856997803628	.000034493999999999998729
ENSDART00000066704	1045.31	750.695	1728.08	810.628	903.615	762.306	851.163	1055.13	1467.02	1231.27	487.059	521.058	9	ct09-spike	.83589839692825895767	4.8158478688735302242	.00035331000000000001727
ENSDART00000066764	726.971	891.538	1574.35	913.383	744.765	845.85	781.119	953.193	1338.99	961.558	487.818	591.117	9	ct09-spike	.89400465193475298076	6.309658513184490225	.000043989000000000001841
ENSDART00000066793	11898.7	9830.2	2168.66	6083.41	3037.71	7740.25	8416.35	6892.86	2245.81	349.755	6909.91	7064.83	23	cos_per_23_ph_23	.82030896107420203656	4.5356725401583597446	.00054095000000000000289
ENSDART00000066904	598.435	985.066	1600.1	751.843	332.137	442.989	662.67	810.899	1424.78	1398.61	123.098	454.008	7	cos_per_25_ph_7	.85612128069083104354	5.2388243297358698669	.00018971999999999999281
ENSDART00000066946	1589.03	1540.88	421.189	1464.47	1434.42	2406.9	2048.71	1362.67	466.645	189.265	1627.82	1865.83	21	cos_per_26_ph_21	.87422824993090997303	5.6940600692299403462	.000099967000000000000195
ENSDART00000067001	358.614	406.879	365.604	263.119	217.484	242.363	436.167	318.098	399.363	240.488	130.015	214.003	4	ct04-sine	.89777158924103694915	6.4455218154372699857	.000036949999999999996899
ENSDART00000067134	438.82	445.143	717.701	488.032	273.959	304.312	455.56	1294.01	1038.04	214.595	181.587	448.777	8	cos_per_21_ph_8	.81045854103093695198	4.3750639131828101824	.00069402999999999999414
ENSDART00000067172	370.83	633.8	910.689	446.538	451.774	483.038	443.751	683.086	893.798	549.849	307.662	525.348	7	ct07-spike	.93482983416536502563	8.3250483269190507229	.0000041466999999999996172
ENSDART00000067174	371.135	529.205	902.731	401.496	395.707	401.454	403.679	597.581	795.87	382.03	339.72	385.425	7	ct07-spike	.98327781730390895198	17.074106359725600868	.0000000050065999999999996476
ENSDART00000067178	205.724	533.085	609.505	242.356	523.492	258.95	311.54	1198.62	880.937	159.884	175.848	135.285	6	ct06-spike	.82624116063259900322	4.6382516672742299946	.00046222999999999999764
ENSDART00000067179	5293.9	5895.75	5641.7	4573.05	4410.79	4126.29	4875.24	5226.23	5872.64	3835.94	4298.24	2919.9	5	ct05-box1	.87058120879772704637	5.5952865859527296521	.00011458999999999999893
ENSDART00000067188	503.057	470.026	505.311	509.932	538.766	1347.45	533.345	588.307	547.638	845.768	1383.82	1801.83	19	ct19-spike	.86577955172701703823	5.4710138887593098289	.00013632999999999999069
ENSDART00000067235	2092.93	2598.22	3363.95	1679.31	1546.07	1914.04	1583.38	2873.5	2756.35	2153.76	1640.36	719.269	6	cos_per_25_ph_6	.86696051683933095244	5.5009978856974699468	.00013071000000000000045
ENSDART00000067251	173.257	170.392	115.627	91.9468	70.5967	114.264	203.75	136.377	65.5187	70.164	38.924	39.5809	2	ct02-spike	.86072395080982200266	5.3466861855014302662	.00016257000000000001051
ENSDART00000067282	849.733	1845.89	2655.59	970.598	229.653	210.03	1168.58	2220.99	2812.54	1358.3	226.461	117.394	7	ct07-rigid	.96491777189753302757	11.621830335852600058	.00000019728000000000000365
ENSDART00000067290	412.896	465.107	654.539	281.633	362.373	296.627	393.04	542.398	631.686	515.133	330.805	389.635	7	ct07-spike	.85784200004932098516	5.2785819072556199316	.00017918999999999999707
ENSDART00000067293	3148.3	3464.55	3124.01	3387.76	2616.55	2599.69	3697.73	3483.51	3374.38	3040.05	1892.45	2608.84	6	ct06-box2	.8677480674821469453	5.5212001850371796863	.00012705999999999999304
ENSDART00000067311	258.63	233.119	521.211	208.295	238.036	284.009	275.714	356.69	464.399	147.473	163.961	172.294	7	ct07-spike	.89665824242093195018	6.4046364389525596295	.000038930999999999997075
ENSDART00000067339	35.1055	44.5445	84.3128	87.8163	61.4388	157.742	41.493	27.6409	26.7924	44.5269	89.8226	114.46	19	ct19-spike	.83460098376566105305	4.791170435384409565	.00036664999999999999458
ENSDART00000067357	187.89	359.191	337.872	185.478	213.949	218.577	423.886	683.862	445.623	185.327	79.6084	185.539	6	cos_per_22_ph_6	.81041169410076796531	4.3743270788316896969	.00069483000000000001359
ENSDART00000067375	329.095	476.12	823.097	414.672	308.297	299.466	341.825	387.139	533.091	245.122	114.161	72.8936	7	ct07-spike	.81490363614300298511	4.4461133105426799972	.00062131000000000002632
ENSDART00000067446	27502.8	23407.9	4671.5	16864.8	2840.03	21319.7	26199.5	19133.2	3846.4	898.286	5893.05	9781.35	1	ct01-box1	.8238940808143859762	4.5971068595260398126	.00049224000000000001694
ENSDART00000067488	381.728	660.16	729.505	256.012	279.055	218.195	270.2	397.917	538.938	271.566	81.9179	44.3253	6	ct06-sine	.86203129542488399206	5.3782285224916304145	.00015543999999999998898
ENSDART00000067511	511.472	738.486	491.394	475.104	246.194	352.261	613.389	475.726	259.89	223.753	242.879	373.332	4	cos_per_22_ph_4	.81460934917997196436	4.4413387968387301186	.00062593999999999995996
ENSDART00000067520	149.502	108.731	384.694	147.085	138.042	157.996	149.241	210.533	309.661	224.794	114.799	227.544	8	ct08-spike	.86193212305461897049	5.3758212644703800009	.00015597000000000001271
ENSDART00000067526	2279.52	2161.34	4054.86	1968.14	2345.82	2262.47	2346.56	3009.28	4122.21	3036.97	1754.88	957.498	7	ct07-spike	.82368282619467303451	4.5934400101970398467	.00049501000000000004633
ENSDART00000067533	114.23	345.447	102.988	205.218	60.2617	99.0878	56.5202	213.488	108.397	58.1732	55.9169	55.3338	4	ct04-spike	.82066393675448900957	4.5416811195476700647	.00053596000000000003881
ENSDART00000067605	84.0732	127.425	365.619	92.4246	143.748	51.4868	118.189	229.324	423.48	261.777	108.064	81.8127	7	ct07-spike	.87384867075916594636	5.6835941289300997425	.00010142000000000000136
ENSDART00000067647	402.2	630.367	869.811	619.279	408.178	386.795	366.971	667.193	1004.31	627.968	503.446	384.264	8	ct08-rigid	.92224251063673801099	7.5434485662763197666	.000009813000000000000745
ENSDART00000067678	1648.23	1737.97	2632.18	1187.77	944.492	604.3	846.293	1427.79	2241.88	806.774	485.47	166.163	7	ct07-rigid	.87406329280678896065	5.6895063692385496879	.00010060000000000000582
ENSDART00000067698	114.717	99.3465	78.818	91.2875	190.649	111.04	83.7056	67.2241	107.203	187.484	105.275	52.1882	16	cos_per_20_ph_16	.85256211781015200923	5.1586385590332799467	.00021303000000000001189
ENSDART00000067720	385.147	609.15	899.684	480.442	401.112	520.268	627.521	578.789	894.905	691.27	329.791	367.27	7	ct07-spike	.83972068523123499784	4.8901273270340199772	.00031617000000000000355
ENSDART00000067755	223.02	480.867	733.279	207.98	157.599	177.833	267.092	285.676	478.182	456.723	122.359	33.9045	7	ct07-rigid	.85493453417810505446	5.211785682343729853	.00019725999999999999177
ENSDART00000067806	401.818	339.86	118.421	69.5377	1574.11	128.908	215.455	149.636	243.024	867.773	897.559	570.042	15	ct15-spike	.81398726019886702421	4.4312795297400997541	.00063579999999999995026
ENSDART00000073434	466.39	691.722	1186.79	717.217	242.85	482.013	645.434	611.449	752.296	617.976	148.742	503.295	7	cos_per_22_ph_7	.814080530025370952	4.432784827431540009	.00063431000000000001705
ENSDART00000073435	396.997	692.5	779.246	325.348	238.764	253.985	404.413	569.88	676.145	890.648	258.064	185.988	6	cos_per_26_ph_6	.88251417174728397086	5.9341677577226601414	.00007213700000000000407
ENSDART00000073488	97.2858	28.3469	13.3673	16.7063	50.427	38.5477	68.4244	28.2276	22.1546	30.4512	12.6177	10.7415	0	ct00-spike	.86502598989673495922	5.452072677825410274	.00014002000000000000448
ENSDART00000073627	212.256	190.677	258.375	174.14	157.707	132.767	212.328	192.089	301.791	140.261	79.419	109.063	5	ct05-box1	.83622610848462497479	4.8221232838967198475	.00034999999999999999644
ENSDART00000073631	396.449	514.733	485.582	494.951	520.447	331.376	427.61	423.238	527.485	626.107	612.962	105.638	9	ct09-box2	.85514858355595002593	5.2166398902622104217	.0001958800000000000016
ENSDART00000073678	130.647	49.6843	174.768	47.141	74.5217	68.5808	50.8152	55.7783	149.089	55.5506	104.196	61.7506	8	ct08-spike	.8180616636600449576	4.498001820391509753	.00057331999999999999282
ENSDART00000073679	16.3365	30.7629	23.4692	23.613	48.6587	164.497	34.1466	29.1372	35.007	75.292	55.9675	79.349	19	ct19-spike	.81786036798226802169	4.4946582453897798715	.00057629000000000002706
ENSDART00000073704	415.293	229.645	117.034	260.941	312.326	342.419	404.767	279.912	97.5729	109.984	256.193	280.119	22	cos_per_26_ph_22	.87978869831536399282	5.8526319219068900779	.000080517000000000001764
ENSDART00000073706	566.945	667.41	1058.58	708.343	562.083	384.569	631.418	1020.19	846.766	318.286	312.495	603.69	8	cos_per_21_ph_8	.91952393169570401099	7.3983163200350796629	.000011597999999999999748
ENSDART00000073716	481.94	881.09	1089.83	531.417	684.713	415.842	411.781	577.044	883.103	891.862	323.256	207.306	8	ct08-rigid	.84340169114986396348	4.9639905136779098882	.00028333999999999998076
ENSDART00000073782	421.389	170.738	74.8807	119.727	129.698	149.822	232.635	120.872	48.7237	39.4731	42.3576	97.2767	1	ct01-spike	.85793366164477402602	5.2807184485948797104	.00017864000000000001081
ENSDART00000073797	177.759	259.12	148.186	141.981	113.448	141.381	255.93	169.192	100.881	72.7633	65.6501	74.3726	2	ct02-spike	.81972151058013098535	4.5257640891321697652	.00054927000000000003165
ENSDART00000073847	2219.55	2131.54	3590.81	2041.09	2121.01	1765.23	2326.75	2522.84	3159.66	2783.57	1854.45	2350.55	9	ct09-spike	.85432638309221498041	5.1980479086617297213	.00020122000000000000129
ENSDART00000073861	3653.63	3058.72	6405.39	4235.15	4185.98	4108.91	3921.96	5434.18	6469.11	4469.83	4466.66	4528.51	8	ct08-spike	.83986166969595699161	4.8929133767791403997	.00031485999999999997713
ENSDART00000073865	550.997	774.175	658.22	547.048	380.733	431.254	425.844	642.205	784.513	982.074	869.872	503.54	7	cos_per_28_ph_7	.8272295227814460139	4.6558041944978496574	.00045001999999999997733
ENSDART00000073895	174.504	186.145	60.4476	57.8322	29.6374	75.508	156.875	126.788	54.72	47.6277	30.3206	65.7792	2	ct02-spike	.94375531092317299642	9.0260524311444196854	.0000020159000000000000453
ENSDART00000073970	672.122	544.84	522.239	507.384	2908.34	429.323	953.909	765.225	797.289	263.415	1415.5	152.479	16	ct16-spike	.84892516692606601048	5.0794148018207696538	.00023910000000000001131
ENSDART00000074125	42.2835	42.8707	174.541	132.876	192.403	56.262	44.084	109.297	144.578	233.925	129.61	64.3251	12	cos_per_23_ph_12	.8884281102271409658	6.1206094508831903056	.000056295999999999997681
ENSDART00000074215	626.741	458.495	974.805	572.251	377.769	408.635	551.258	694.451	928.968	922.149	325.501	303.92	8	ct08-rigid	.82162584161969298702	4.5580442009394399605	.00052263999999999999693
ENSDART00000074216	429.417	616.861	1001.24	404.273	408.31	309.583	461.459	685.515	949.504	614.916	150.281	528.124	7	ct07-spike	.88610844504399099986	6.045855800244590128	.000062144999999999995383
ENSDART00000074359	269.017	528.655	71.2375	342.113	235.934	244.779	330.055	632.833	75.7864	70.1168	271.205	275.689	3	ct03-spike	.84770428870067504601	5.053407378189340271	.00024837999999999997667
ENSDART00000074436	434.814	471.739	56.0647	163.888	65.0493	55.6065	245.539	246.232	65.9665	71.0315	19.0137	26.4842	2	ct02-spike	.88878238566929701481	6.1322194665011702241	.000055442000000000002131
ENSDART00000074444	37.7599	31.3917	20.8528	62.2977	199.517	38.9659	45.4535	29.5186	28.804	23.9223	112.836	53.1356	16	ct16-spike	.90332717012918795074	6.6594158215892296226	.000028212999999999999065
ENSDART00000074455	1701.65	3020.7	2406.84	1394.69	335.462	1042.03	1647.87	2260.37	1185.36	490.51	444.576	1498.17	5	cos_per_22_ph_5	.92992750083840902686	7.9965892809770702243	.0000059094999999999999173
ENSDART00000074511	25.4399	34.6127	59.5277	29.013	26.1588	88.2554	28.3237	43.4808	29.5762	53.2572	51.5195	82.261	20	ct20-spike	.84527160433023595942	5.0024311396171601274	.00026770999999999999658
ENSDART00000074534	1908.57	3752.63	1900.87	1723.82	773.238	1462.99	1850.4	2802.57	1733.19	448.368	580.735	1039.85	4	ct04-rigid	.88720583079150905359	6.0809499321331497157	.000059320999999999996671
ENSDART00000074544	920.005	972.843	1098.98	544.753	420.959	546.312	777.646	793.991	876.282	792.776	403.936	590.651	5	ct05-sine	.88165864846403796395	5.9082897987280302843	.000074690000000000004868
ENSDART00000074597	950.056	844.074	1284.6	916.053	689.997	599.59	784.761	818.979	1296.28	959.972	389.946	367.088	7	ct07-rigid	.86582819757886197998	5.472241714885210051	.00013610000000000000136
ENSDART00000074671	43.5393	56.7267	51.1653	33.111	38.6181	98.4139	41.5373	41.8915	61.3093	64.5392	47.5909	79.5961	20	ct20-spike	.84494147931907503946	4.9955983677410902288	.00027042000000000000282
ENSDART00000074682	32.304	39.1274	13.3013	17.3194	31.7797	63.6184	51.3712	42.4805	31.5103	13.9168	17.1326	12.3548	23	cos_per_28_ph_23	.81504674661419096449	4.4484388325968300393	.00061906999999999999355
ENSDART00000074683	49.3327	34.552	57.044	41.8376	46.5906	84.2772	57.4337	27.9158	23.091	37.891	51.5878	90.9388	21	ct21-spike	.88516428075381103913	6.0160409232995801787	.00006465800000000000334
ENSDART00000074728	132.621	27.158	57.7724	36.2927	44.982	27.3011	96.9083	88.4495	52.901	21.0607	19.7311	51.792	1	ct01-spike	.82885172388710703917	4.6849108661538299003	.00043052999999999998606
ENSDART00000074746	763.6	962.283	256.538	614.988	292.218	420.696	762.681	529.105	171.094	210.161	220.976	326.433	2	ct02-spike	.82645201530456902095	4.6419848868970001732	.00045960000000000000419
ENSDART00000074757	2203.89	2740.46	1961.69	1461.01	931.978	2965.82	2597.11	2567.12	1675.84	680.1	1199.31	1213.97	2	cos_per_24_ph_2	.81126528778593298696	4.3877913759398703419	.0006803700000000000199
ENSDART00000074817	1634.21	2133.67	3325.06	4031.35	6653.55	6432.86	1295.97	1361.82	2178.34	997.57	7627.26	2672.47	17	ct17-spike	.85063420944744505547	5.1163115298849204393	.00022655999999999999923
ENSDART00000074819	14.7944	9.8355	17.7873	18.8646	30.7225	39.9542	9.6297	13.6528	12.8924	26.1371	22.2366	70.435	19	ct19-spike	.88311433389750404466	5.9524802245343000351	.000070385999999999999998
ENSDART00000074936	31.4536	26.8069	43.5968	58.9354	23.6098	18.5929	17.9222	22.8056	54.6648	77.2041	45.5762	10.0325	11	ct11-spike	.85725052783583599592	5.2648410068529800654	.00018274999999999999687
ENSDART00000074950	2684.53	2464.4	1541.56	1583.32	1413.45	1998.25	3460.4	3604.26	2480.06	891.313	1396.83	2403.59	1	cos_per_25_ph_1	.88217545706066402555	5.923890691201430414	.000073139000000000005657
ENSDART00000074959	147.522	251.233	65.0116	146.983	94.9147	76.0363	196.82	175.762	86.3503	144.159	87.0988	95.0155	2	ct02-spike	.81071394526405105019	4.3790853578634099108	.00068968000000000002393
ENSDART00000075009	4433.42	4678.87	4536.51	3416.3	3253.12	3358.03	3677.41	4007.05	5114.72	5128.15	3188.97	1527.15	5	cos_per_27_ph_5	.85954944995272197783	5.3186973537313697591	.00016918999999999999794
ENSDART00000075069	249.337	197.319	76.6458	192.916	83.3026	128.347	293.447	151.219	146.071	100.61	109.989	144.729	1	ct01-spike	.86310946595725701602	5.4045555443298596288	.00014974000000000001307
ENSDART00000075070	680.276	1598.08	916.029	786.957	199.894	626.631	841.558	1213.01	579.554	227.018	272.528	394.229	4	ct04-rigid	.8716034062477979738	5.6225749598015397623	.00011032999999999999567
ENSDART00000075142	825.577	708.582	1284.76	782.68	1070.05	680.963	816.507	963.617	1402.66	1098.94	796.189	643.979	9	ct09-spike	.82674528970231098146	4.6471876125303097638	.00045596999999999998643
ENSDART00000075145	41.5181	37.1697	156.163	28.5197	65.7826	66.4619	44.146	53.8686	100.276	47.8076	52.4242	40.2705	8	ct08-spike	.88815779533906802357	6.1117858588531497332	.000056953999999999997141
ENSDART00000075187	357.716	286.993	539.723	396.128	390.728	260.707	357.706	374.469	537.952	385.864	327.857	40.864	8	ct08-rigid	.81973387881232395724	4.5259722525952197358	.00054909000000000001643
ENSDART00000075213	602.627	497.044	454.671	447.309	303.414	433.677	670.011	522.083	550.165	288.151	275.25	478.496	2	cos_per_24_ph_2	.84528682059361404111	5.0027465615454795866	.00026758000000000000968
ENSDART00000075222	2701.42	3746.8	2684.93	2408.64	2420.79	2251.04	3430.54	2747.72	2785.49	1727.58	1894.75	2537.36	4	cos_per_23_ph_4	.82505226541833698306	4.6173165169805301389	.00047725000000000002663
ENSDART00000075223	2698.8	2876.12	3466.51	1427.24	1655.74	1136.05	1345.21	2375.72	2884.42	3946.79	695.779	272.795	5	cos_per_27_ph_5	.84062004261002198913	4.9079577329034798083	.00030789000000000000829
ENSDART00000075244	1150.6	1340.84	2667.22	2696.84	3215.91	2021.85	991.182	1175.72	2723	2402.56	2743.85	572.859	12	ct12-box1	.90895586587506904674	6.8947554659292400459	.000021106000000000000872
ENSDART00000075259	47.4936	28.6817	51.9915	27.6579	73.0251	156.483	48.5044	38.5477	48.0013	105.487	104.671	143.059	19	ct19-spike	.88040157606617097663	5.8707390913633501484	.000078570000000000001601
ENSDART00000075262	1117.24	1923.45	1319.63	964.285	818.33	1299.14	1715.2	1767.62	1213.02	474.636	874.828	1201.67	4	cos_per_22_ph_4	.91510199117839097216	7.1767000315085498485	.000015039999999999999997
ENSDART00000075269	156.751	89.4254	35.252	128.7	130.956	188.099	175.922	176.517	32.4907	149.369	123.499	109.374	20	ct20-box2	.82620383532303098839	4.6375914565678000301	.0004626899999999999763
ENSDART00000075320	2435.04	2821.86	241.089	2049.64	1535.26	1125.2	2751.55	2413.32	219.978	162.554	780.283	791.268	2	ct02-spike	.84042559319371401561	4.9040909739826101799	.00030967000000000000819
ENSDART00000075326	6518.39	4365.53	8829.57	8413.75	7453.85	6400.11	6395.33	7187.69	9050.86	8505.79	8246.93	6239.39	12	ct12-box1	.84361021292548099559	4.9682458899798902507	.00028155999999999998086
ENSDART00000075389	49.1485	75.8623	145.169	60.1152	70.1588	37.7981	53.2457	52.1534	93.7342	101.584	38.2669	19.0169	8	ct08-rigid	.83104761549539596377	4.7249141932214797635	.00040518999999999998811
ENSDART00000075443	5149.1	5932.04	8494.19	5599.86	5538.46	5865.92	5641.61	6604.49	6728.85	4942.05	4873.48	4775.29	7	ct07-spike	.86365571687657205491	5.4180042677023303455	.00014692000000000000957
ENSDART00000075465	870.706	558.187	47.0532	18.0372	3822.01	58.1246	489.426	100.01	165.75	137.905	1167.01	40.8025	16	ct16-spike	.81403476056919799042	4.4320460193438302454	.00063504000000000001853
ENSDART00000075474	366.565	216.559	104.781	186.465	527.179	356.507	208.722	249.179	169.463	279.197	486.584	155.469	16	ct16-spike	.81338748746115896449	4.4216239074286800559	.00064541999999999995642
ENSDART00000075497	142.609	101.519	56.7515	168.779	211.283	250.548	244.861	188.113	79.4995	14.1426	143.736	115.877	21	cos_per_28_ph_21	.86726232057465801883	5.5087200330161500972	.0001292999999999999987
ENSDART00000075502	1581.4	2134.01	3049.03	1523.6	1434.81	1426.83	1590.5	2182.4	2677.32	2370.77	982.874	1664.71	7	ct07-spike	.84264438029120702911	4.9486009757977500456	.0002898700000000000148
ENSDART00000075517	107.566	95.0705	41.085	45.3036	752.639	69.0331	118.64	99.7539	51.0915	128.876	249.22	58.2033	16	ct16-spike	.82644315885168695424	4.6418279579677399482	.00045971000000000000144
ENSDART00000075519	630.866	650.194	838.177	547.812	2645.93	1727.96	860.138	416.339	639.499	174.207	3985.19	231.754	16	ct16-spike	.90416518913024201964	6.6932003747720596465	.00002705099999999999901
ENSDART00000075529	1729.59	1487.27	2986.23	1739.4	769.958	836.534	1566.09	1778.47	2861.46	3508.77	584.6	1137.42	10	ct10-spike	.81516347410225098447	4.4503374310943497605	.00061724999999999996016
ENSDART00000075530	1190.53	119.08	83.6934	104.675	7801.65	117.885	210.465	206.648	202.786	625.423	6577.07	97.3547	16	ct16-spike	.98841999584121498224	20.598381815689698726	8.0419999999999997328e-10
ENSDART00000075584	624.583	807.687	1452.98	777.243	887.45	549.833	656.721	839.808	1269.17	215.732	490.013	432.916	7	ct07-spike	.86854496915095602549	5.5418137550170802896	.00012344999999999999203
ENSDART00000075593	1926.45	2151.82	3199.87	2541.68	827.981	1226.94	1704.29	2003.87	3125.57	1668.53	606.509	1545.67	8	cos_per_22_ph_8	.86781693260153303093	5.5229746868898397238	.00012674999999999999093
ENSDART00000075632	464.173	706.669	1224.14	623.351	572.88	578.822	440.861	634.877	1145.96	731.21	414.5	282.848	9	ct09-spike	.91236643547844797908	7.0477177834919899624	.000017541000000000000277
ENSDART00000075652	786.072	622.79	1704.96	514.894	702.033	364.72	543.68	845.662	969.186	576.766	337.629	175.809	7	ct07-spike	.81242994209222696433	4.4062948061366498109	.00066102000000000001034
ENSDART00000075673	7165.01	5590.5	6512.79	4199.78	2264.52	4441.94	4915.42	5763.23	5219.08	4970.02	2208.76	1053.17	3	cos_per_27_ph_3	.85186946887406100881	5.1433440648867003731	.00021781999999999999821
ENSDART00000075675	27.3719	25.6655	37.45	47.2912	36.854	26.7278	32.2165	27.1373	20.5795	57.6492	25.7966	14.0367	13	ct13-spike	.82946061258502301605	4.6959329459717098487	.00042338999999999999682
ENSDART00000075713	86.19	139.959	63.9417	53.4657	50.629	42.9432	78.049	129.116	85.8012	31.8807	65.9232	62.7044	3	ct03-spike	.91213927371443903613	7.0372665345843499196	.000017762999999999999168
ENSDART00000075718	304.243	403.622	409.601	190.834	160.385	209.972	132.303	288.795	380.325	512.968	149.52	139.675	5	cos_per_28_ph_5	.84486744184218998122	4.9940687185501095868	.00027103000000000001223
ENSDART00000075757	352.726	354.652	704.701	297.522	324.454	343.214	315.373	333.469	556.458	542.473	337.694	140.516	9	ct09-spike	.8270388475499059755	4.6524073550912996566	.00045236000000000001252
ENSDART00000075770	227.688	409.93	503.795	277.852	290.193	232.449	274.426	281.261	447.654	332.93	168.412	129.709	8	ct08-rigid	.868106754499386013	5.530456904205189872	.00012542999999999999679
ENSDART00000075782	221.597	194.593	74.7454	137.643	276.161	547.755	380.034	244.565	178.966	23.0069	99.6779	131.044	22	cos_per_28_ph_22	.86284261213640800481	5.3980126789993700953	.00015112999999999999806
ENSDART00000075918	154.127	480.414	811.559	327.708	272.344	363.382	388.306	430.295	556.986	111.536	201.487	81.8004	7	ct07-spike	.8432661952331520494	4.9612295680492097816	.00028449999999999997643
ENSDART00000075926	300.482	61.7951	63.025	89.7857	880.948	197.884	88.3775	22.0259	55.5197	39.5388	342.783	97.5829	16	ct16-spike	.82132356479348600509	4.5528892959473497015	.00052680000000000001131
ENSDART00000075931	28.1191	63.2939	24.0141	26.033	22.6528	24.2917	32.6192	50.8247	37.4176	35.3441	20.168	19.4959	4	ct04-spike	.88238132448414097198	5.9301320299140902748	.000072528999999999996251
ENSDART00000076030	3904.09	2073.93	3148.23	2871.09	3248.51	3161.32	4857.57	2269.28	2844.79	3107.69	2560.92	3669.08	23	ct23-spike	.83478958211746201457	4.7947412243668496856	.00036468999999999997946
ENSDART00000076128	1486.66	2610.04	1688.14	1656.74	1021.18	1332.63	1596.68	1479.51	2178.56	1835.66	841.664	994.265	5	cos_per_26_ph_5	.81369416133368399624	4.4265557623881397475	.00064048999999999996127
ENSDART00000076333	8268.39	6632.05	9335.24	7918.84	5011.18	6866.33	8231.68	8351.29	8237.95	6023.51	4222.24	6475.68	5	ct05-box2	.82564169085394800707	4.6276714492173702808	.00046975000000000000696
ENSDART00000076381	618.391	1094	959.43	925.143	740.389	392.169	842.745	1062.82	819.419	180.131	261.714	487.359	7	cos_per_22_ph_7	.81496205319001702172	4.4470622854766501675	.00062040000000000000962
ENSDART00000076403	11.5546	37.2982	11.5042	42.0524	21.0112	24.8281	18.0537	14.766	14.4484	59.7132	16.4231	21.2265	12	ct12-spike	.84185917699066603603	4.9327515528898100428	.00029676000000000002507
ENSDART00000076409	915.808	802.326	1797.06	796.187	769.553	478.415	735.951	990.402	1530.63	1939.12	309.853	32.3496	8	ct08-rigid	.81127121229159304683	4.3878851128226701306	.00068026999999999996326
ENSDART00000076417	924.298	1681.65	2450.67	1077.17	986.576	1453.18	1216.37	1486.77	2599.59	985.708	973.55	1176.05	7	ct07-spike	.96467653315853696405	11.579892414788000465	.0000002040800000000000116
ENSDART00000076443	272.538	415.585	553.507	221.716	192.368	168.215	281.131	390.935	553.915	243.553	251.533	398.176	7	ct07-spike	.89406659434608604098	6.3118370559127203734	.000043866000000000003188
ENSDART00000076478	6112.96	5886.4	8673.28	7809.54	5370.87	5697.49	5890.78	7777.7	8592.73	6852.89	5586.89	7819.32	10	cos_per_20_ph_10	.83547303905736702845	4.8077280859417896863	.00035763999999999999783
ENSDART00000076484	209.949	295.603	366.635	230.9	197.429	212.088	203.07	230.668	301.865	162.091	193.465	189.231	7	ct07-spike	.8952166086198130035	6.3526141672276503769	.00004161900000000000251
ENSDART00000076647	439.529	1112.09	69.1316	690.901	291.929	442.667	623.022	793.063	243.878	245.157	275.955	363.119	3	ct03-spike	.82456758269818197782	4.608837074502740272	.00048347999999999999917
ENSDART00000076731	74.9167	409.213	1057.97	278.557	82.688	581.483	534.831	1102.67	1436.92	474.55	398.188	213.961	7	ct07-spike	.8367052737695349629	4.8313298637108399447	.00034519999999999998819
ENSDART00000076835	799.348	738.245	818.224	551.744	361.35	330.561	461.781	529.889	729.916	657.756	150.061	310.84	5	cos_per_26_ph_5	.8470475811643890518	5.0395364445891503991	.00025348999999999998704
ENSDART00000076883	40.0669	55.1003	53.1207	42.3822	41.8582	19.5796	33.1158	30.8931	70.8569	63.1572	16.9533	15.1097	8	ct08-rigid	.82316917686630597384	4.5845491272019502915	.00050180000000000005416
ENSDART00000076946	1114.55	1810.81	621.832	1037.01	518.038	894.65	1148.49	1335.29	760.849	636.061	632.997	910.02	3	ct03-spike	.8722897770338550183	5.6410690808029002596	.00010754999999999999857
ENSDART00000077047	548.79	576.578	712.728	729.327	389.622	439.392	531.409	1043.15	1252.86	661.392	361.981	169.866	8	cos_per_23_ph_8	.83532520042406999128	4.8049126608322501042	.00035916000000000002394
ENSDART00000077057	891.384	1208.08	1053.06	755.472	641.54	676.68	786.719	925.736	890.003	206.095	436.194	756.855	5	cos_per_22_ph_5	.83210527601397199504	4.7444354097860097497	.0003934100000000000162
ENSDART00000077078	711.093	819.401	1349.81	784.888	765.854	658.533	771.726	705.932	1266.81	712.656	675.554	228.094	8	ct08-spike	.84674065958377797703	5.0330817325502898996	.00025589999999999998598
ENSDART00000077106	73.03	42.4153	18.8461	46.7951	58.2066	87.9988	118.218	114.965	34.0005	55.8284	31.7595	45.2345	23	cos_per_28_ph_23	.84799860773649904377	5.0596507078377603861	.00024612000000000000847
ENSDART00000077119	1016.31	644.889	691.298	446.407	262.702	405.026	669.576	564.552	649.867	117.46	337.723	385.273	3	ct03-box1	.84227709117872395783	4.941173729825949934	.00029306999999999998417
ENSDART00000077121	3883.59	2097.6	1592.31	2252.18	842.987	1582.78	3354.34	2878.03	1974.75	404.89	1069.5	2537.32	1	ct01-rigid	.81059474284985799653	4.3772075604782596514	.0006917100000000000028
ENSDART00000077207	38.3497	19.884	20.078	58.5525	76.586	41.627	38.1564	31.8157	32.5584	51.5281	57.2365	17.2068	14	ct14-spike	.84842588491173198673	5.0687441292118595726	.00024285999999999998886
ENSDART00000077209	283.249	402.92	178.294	262.925	150.617	172.954	276.538	347.194	193.351	106.865	155.722	80.6622	3	ct03-spike	.86398194412699502731	5.4260717767485200369	.00014525000000000000693
ENSDART00000077223	199.164	288.815	289.247	276.37	210.245	164.155	217.979	237.945	353.554	230.763	94.4437	134.794	8	cos_per_23_ph_8	.88451601223571196808	5.9957690682937103688	.000066427999999999994864
ENSDART00000077264	278.37	455.371	509.637	274.303	235.68	269.586	505.905	395.091	527.538	281.134	228.504	345.354	6	cos_per_22_ph_6	.84691083738887495969	5.0366584568267001032	.0002545599999999999751
ENSDART00000077314	222.915	235.313	642.215	259.759	370.025	240.881	310.267	270.701	692.793	531.091	370.828	247.314	9	ct09-spike	.88810321473912801071	6.1100078955594501195	.000057087999999999999585
ENSDART00000077383	165.822	215.776	292.03	168.247	146.629	144.091	159.976	195.557	259.803	124.638	79.8791	98.1086	7	ct07-spike	.88759964885762199227	6.0936617541248203622	.000058332999999999998676
ENSDART00000077388	47.0106	47.3273	36.4955	74.9643	31.6993	42.6084	24.568	43.481	57.2648	151.575	39.465	47.1341	12	ct12-spike	.83537046049885699261	4.8057742227838495808	.00035868999999999999625
ENSDART00000077405	36.0652	24.5901	21.0357	10.9546	93.7204	17.7808	30.0073	15.2544	21.7616	44.2158	51.9817	26.2318	16	ct16-spike	.82843794290799799285	4.6774510001379701052	.00043543999999999999156
ENSDART00000077435	1294.03	2350.76	2571.9	1521.16	1491.31	1448.04	1899.15	1910.49	2231.37	683.705	1185.2	964.179	6	ct06-spike	.8184182127890700098	4.5039364706537003968	.00056809000000000004459
ENSDART00000077436	226.096	107.929	86.61	39.7923	57.3908	90.1737	217.365	105.099	58.1337	31.5069	56.5086	115.223	1	ct01-spike	.93175613581700600374	8.1151080406120605915	.0000051939000000000003652
ENSDART00000077452	1886.56	1767.95	2402.49	2162.08	1477.3	1428.47	2031.96	2406.21	2431.15	773.691	1070.63	2145.47	8	cos_per_20_ph_8	.83622763452216797297	4.8221525464179801901	.0003499800000000000068
ENSDART00000077493	2408.44	2101.59	2887.85	2720.95	988.925	2509.82	2524.96	2910.81	2782.55	1430.71	1229.03	2723.49	3	ct03-box2	.85181882950418996714	5.1422297615288199424	.00021817000000000000672
ENSDART00000077631	1287.19	797.069	2515.85	1307.88	870.991	1095.06	1760.09	1459.72	2112.02	784.237	604.7	1172.7	8	ct08-spike	.81451098440468394646	4.4397452016144400844	.00062748999999999997054
ENSDART00000077635	1569.67	4798.68	5235.57	888.564	1017.67	857.17	1184.27	1812.93	2774.22	4601.35	2521.84	1013.28	6	cos_per_28_ph_6	.82940232820295900495	4.6948755695386097386	.00042407000000000002419
ENSDART00000077647	80.2093	31.217	55.4437	46.4741	59.495	187.77	96.8535	24.9524	66.1894	53.4295	48.7293	86.3537	21	ct21-spike	.81262532469532899881	4.4094140771493304243	.00065780999999999999195
ENSDART00000077783	564.948	1118.79	930.591	850.718	292.697	623.858	1067.56	1539.74	1155.32	249.072	317.172	764.813	6	cos_per_22_ph_6	.91235104528308896832	7.0470084880471199895	.000017555999999999999286
ENSDART00000077790	28.0276	57.6569	22.3892	14.2095	181.974	23.4899	37.6475	21.047	47.3817	33.656	264.319	23.1414	16	ct16-spike	.96172430175687395604	11.098647119402500039	.00000030334000000000001501
ENSDART00000077804	2068.53	1854.66	2473.01	1383.82	1162.24	1717.61	2185.1	2851.37	1966.09	675.615	890.087	2458.52	6	cos_per_21_ph_6	.86315300992494903287	5.4056248609706898378	.00014950999999999999663
ENSDART00000077835	425.56	555.126	728.508	522.774	453.309	346.211	520.424	636.767	892.892	262.133	273.335	538.224	7	ct07-spike	.84041888772989403744	4.9039577464240302618	.00030972999999999997712
ENSDART00000077871	192.714	111.332	26.4056	30.0286	670.677	22.9926	113.018	53.0469	29.9524	62.9386	321.14	17.4201	16	ct16-spike	.87976298719807299875	5.8518751338945502738	.000080599999999999994023
ENSDART00000077873	552.981	872.989	2145.68	2437.94	1232.46	1274.05	873.735	1623.19	2439.94	2467.03	1465.5	760.567	11	cos_per_23_ph_11	.9381011329692440226	8.5648565356157604356	.0000032233000000000001234
ENSDART00000077883	1212.22	774.059	318.134	243.043	251.4	179.583	1112.62	347.162	490.724	190.033	105.02	287.544	1	ct01-spike	.93579498051895704247	8.3939531443544801448	.000003854900000000000141
ENSDART00000077887	17.708	8.7564	24.0069	39.9145	417.812	24.2401	169.799	134.282	38.6151	22.3236	491.407	15.3	16	ct16-spike	.94860052866958299855	9.4785657782058194698	.0000012954999999999999207
ENSDART00000077910	89.1242	129.896	84.4838	110.385	3958.7	35.9267	753.538	211.163	354.062	225.76	2113.39	20.1034	16	ct16-spike	.92881433907701305142	7.9266090291478299434	.0000063818999999999998329
ENSDART00000077946	345.102	285.906	592.755	402.343	387.001	223.201	359.169	347.448	506.034	420.478	136.244	262.692	9	ct09-spike	.81727424611229704254	4.4849509377639700247	.00058500999999999995713
ENSDART00000077962	667.798	749.411	1177.96	736.841	662.615	572.523	589.648	770.047	999.384	535.078	481.192	654.085	7	ct07-spike	.92227107819103704145	7.5450122981819998103	.0000097953999999999994227
ENSDART00000078014	2626.91	3686.79	2661.02	2144.5	1067.62	1305.63	2745.1	2496.42	2280.44	512.162	464.149	1353.14	5	cos_per_23_ph_5	.8932107549556109749	6.2818954493154199881	.000045599000000000001673
ENSDART00000078019	1075.47	822.093	546.544	432.027	146.473	402.795	1654.59	223.973	538.119	102.438	122.7	128.871	1	ct01-spike	.85665423897296300026	5.2510677805120602457	.00018640999999999999909
ENSDART00000078021	62.7534	49.0425	32.7169	189.647	92.0649	76.8178	75.5776	72.0663	70.7009	154.224	84.8887	114.193	13	ct13-spike	.87746895114933898263	5.7852522618152804057	.000088232999999999993618
ENSDART00000078047	1283.2	1945.69	2740.79	1599.92	1486.35	1227.34	1346.12	1830.16	2464.4	2938.84	989.748	338.271	8	cos_per_25_ph_8	.86378489608022801516	5.4211956205998097502	.00014625999999999999895
ENSDART00000078062	2040.83	2809.45	1254.64	1716.02	1395.73	2384.21	3144.09	2587.46	1044.59	291.309	1274.66	3157.3	0	ct00-box1	.87572780353596202385	5.7358428386678603772	.000094394999999999993235
ENSDART00000078197	48.0655	35.3029	170.262	117.554	78.2445	89.2581	66.8409	56.4719	134.527	138.568	48.9743	35.0793	10	ct10-spike	.90336516716296699769	6.6609386270316797152	.000028160000000000001436
ENSDART00000078202	452.284	352.131	131.242	315.881	147.108	280.144	632.942	249.006	55.4558	95.0286	97.0139	101.605	1	ct01-spike	.8653868248429209542	5.4611240582237199348	.00013824000000000000459
ENSDART00000078228	39.4744	29.0263	30.252	21.8422	183.864	38.5121	49.7159	28.0234	42.4781	161.49	146.932	77.2244	15	ct15-spike	.81976568196410104505	4.5265076039998497492	.00054863999999999997839
ENSDART00000078230	554.803	651.418	667.075	369.159	464.856	598.089	597.671	478.05	588.71	359.544	461.755	474.564	1	ct01-box2	.81722015275719595007	4.4840571655466900935	.0005858200000000000256
ENSDART00000078232	25.5495	36.0985	50.876	18.0001	22.3834	23.2565	36.1255	26.4456	62.0292	26.3044	30.634	19.4231	7	ct07-spike	.89344180324051802877	6.2899451306194098521	.000045126000000000001289
ENSDART00000078256	2125.44	2039.7	801.831	1330.47	747.302	899.749	2057.63	1635.55	804.487	50.1926	692.568	857.162	2	ct02-spike	.88815050539770401539	6.1115483181407697089	.000056972000000000002729
ENSDART00000078299	162.434	206.808	351.231	174.587	241.772	140.427	118.671	254.022	441.327	134.106	241.08	161.173	7	ct07-spike	.8917557486737720529	6.2317635405519702374	.000048668000000000002274
ENSDART00000078329	23.7326	34.6522	22.6595	45.5517	25.6412	143.66	28.1137	28.0319	26.4301	13.4872	97.833	119.611	19	ct19-spike	.91282180408418200912	7.0687856049987400908	.000017104000000000000903
ENSDART00000078373	161.728	555.273	739.718	565.424	354.065	408.421	327.005	635.454	1100.65	694.425	222.213	261.275	9	cos_per_23_ph_9	.87739164714241202336	5.7830377316141001742	.000088499999999999996313
ENSDART00000078381	16.2657	50.394	36.2824	61.3376	36.9946	20.5101	22.1336	33.6223	39.7946	60.13	36.3987	22.6285	11	ct11-rigid	.85950738141843896489	5.3177008694863499016	.0001694300000000000092
ENSDART00000078387	2705.28	3141.6	3882.75	2985.77	1808.67	2026.68	2393.88	3397.87	3639.02	2193.63	986.913	2672.6	7	cos_per_22_ph_7	.90797870731847096781	6.8524320453174096812	.000022226000000000000313
ENSDART00000078405	605.768	414.842	29.9954	326.156	143.98	215.636	466.154	177.872	75.0028	94.6565	66.3882	66.135	1	ct01-spike	.84881883118245504694	5.0771381237276997922	.00023990000000000000365
ENSDART00000078425	53.3668	33.3805	142.07	85.6882	53.2643	64.6564	52.393	61.9314	141.491	155.872	50.0074	109.58	10	ct10-spike	.82595795955081796613	4.6332472055694902124	.0004657700000000000078
ENSDART00000078567	130.277	233.164	204.372	170.166	134.338	135.129	160.544	222.909	237.377	164.684	74.969	192.687	7	cos_per_22_ph_7	.86293721954617796932	5.4003302886895898638	.00015064000000000000784
ENSDART00000078570	378.295	437.323	752.486	256.989	317.791	211.992	336.104	356.316	731.979	344.158	144.716	232.966	7	ct07-spike	.93489929928559600825	8.3299581410236100965	.0000041250999999999996885
ENSDART00000078576	599.009	874.867	1128.71	505.328	280.768	413.54	642.284	782.77	806.474	409.568	296.181	359.424	6	cos_per_23_ph_6	.93248760647289097303	8.1638112856123097316	.0000049276000000000000519
ENSDART00000078596	6275.3	4134.72	3236.84	3022.76	1785.52	3208.07	3479.06	4070.91	2664.89	1576.95	684.418	2425.21	1	cos_per_25_ph_1	.82134569991343497897	4.553266378723740182	.0005264900000000000092
ENSDART00000078599	114.575	211.775	69.0694	458.807	194.275	183.775	174.654	114.689	68.2803	347.524	67.3764	242.506	12	ct12-spike	.84586200819422396879	5.0147011365776101854	.00026290999999999998833
ENSDART00000078608	3923.66	3353.9	3268.82	2499.88	1309.21	2748.2	3060.53	3369.54	3450.09	3237.11	1034.9	1488.65	2	cos_per_27_ph_2	.88288006785372497021	5.9453164698258103016	.000071066000000000000263
ENSDART00000078683	2576.49	6544.63	7912.76	8396.9	3743.05	4173.16	3793.1	6755.91	9342.89	5914.32	5584.06	1120.63	9	cos_per_23_ph_9	.91011155069473304025	6.9456567456980202735	.00001983999999999999978
ENSDART00000078763	48.1704	53.628	48.08	126.418	63.2172	63.2769	43.0211	100.506	38.5783	189.631	56.2842	79.7711	12	ct12-spike	.87142373302893505471	5.6177565015031598605	.00011107000000000000553
ENSDART00000078854	390.218	149.554	250.683	197.178	234.083	168.802	429.569	243.115	199.433	130.242	117.007	129.733	0	ct00-spike	.88751534236932094757	6.0909351945812604257	.000058544000000000000553
ENSDART00000078858	6681.75	8668.65	11840.9	8594.71	5533.96	7438.89	8040.91	10316.6	11607.5	10164.7	5259.81	6372.6	8	cos_per_23_ph_8	.89830174945044705126	6.4652136388618304252	.000036034000000000000925
ENSDART00000078860	106.342	52.1258	110.212	58.2516	7732.5	157.971	123.268	103.982	104.741	245.564	1726.52	66.1093	16	ct16-spike	.81418097279463097493	4.4344070278271603414	.00063272000000000002719
ENSDART00000078866	928.434	1018.72	1847.82	1305.58	3585.32	949.282	1103.01	1005.25	1482.8	1507.4	2968.63	1865.25	16	ct16-spike	.90990007811405304583	6.9362729032215701963	.00002006699999999999947
ENSDART00000078936	516.027	546.392	749.899	451.944	607.332	433.061	404.392	565.685	868.233	420.493	301.596	590.346	7	ct07-spike	.83750991912032302089	4.84687350846842957	.00033725999999999997951
ENSDART00000078938	29.0025	39.4028	24.9038	59.0821	21.8542	21.2773	20.112	22.3971	26.9984	41.8426	25.4805	26.2362	12	ct12-spike	.83934133522959997187	4.8826474736567195833	.00031972000000000000853
ENSDART00000078952	56.7087	59.2369	21.6329	32.373	33.3646	25.4913	53.7756	44.2246	19.239	40.7347	29.1362	26.7933	2	ct02-spike	.88382317660403597603	5.9742799488180899914	.000068361999999999993626
ENSDART00000078974	596.231	1154.85	304.269	711.556	472.57	470.377	776.01	1024.24	295.909	52.5142	254.805	148.782	3	ct03-spike	.85748132420426403932	5.2701933998265797499	.00018136000000000001187
ENSDART00000078980	259.978	168.655	343.131	383.973	199.102	202.738	191.074	281.399	427.446	624.662	150.178	281.25	11	ct11-spike	.84179815516590994484	4.9315243406118298708	.00029730000000000001651
ENSDART00000078984	1004.32	1016.4	1424.73	1534.68	2720.06	970.025	1281.75	1341	1352.94	649.332	2103.1	1072.07	16	ct16-spike	.86966665163908196678	5.5711255992583001984	.00011851000000000000206
ENSDART00000079012	42.5655	75.8363	85.9261	103.161	117.157	123.468	59.0518	23.3057	68.1641	51.2109	106.015	99.8829	15	cos_per_28_ph_15	.84012758452843594448	4.8981773788343803133	.00031240000000000000407
ENSDART00000079049	120.492	58.9727	16.9196	61.6024	441.63	39.3605	38.8277	82.6325	33.2763	65.9638	803.891	75.0548	16	ct16-spike	.93703951665981100039	8.4850545601392095563	.0000035030000000000001729
ENSDART00000079060	1270.28	3333.93	3037.63	2509.14	332.768	848.042	1583.22	2395.31	2228.99	581.565	630.57	653.852	7	cos_per_22_ph_7	.90064778555987201614	6.5541350790047303576	.000032196000000000001419
ENSDART00000079070	474.713	522.088	1121.38	562.358	388.045	464.787	514.858	483.882	943.796	778.86	377.226	824.332	9	ct09-spike	.84841040484868801563	5.0684140626234501781	.00024298000000000000804
ENSDART00000079080	2316.69	2503.09	1088.28	1553.23	2219.14	1888.42	2187.83	1853.47	1257.82	906.525	1544.56	1942.49	22	ct22-box2	.82989033882262397412	4.703744103223519879	.00041839999999999997853
ENSDART00000079154	1315.89	1527.78	1390.15	1148.22	642.741	979.907	1358	1397.2	1783.73	1619.87	493.36	1339.52	5	ct05-box2	.88454460987044203346	5.9966599569602596631	.000066348999999999997822
ENSDART00000079173	256.399	508.333	230.437	195.438	219.549	235.79	316.128	319.115	96.1884	125.352	94.1537	139.034	3	ct03-spike	.82878459999457099183	4.6836990553341397714	.0004313300000000000055
ENSDART00000079248	1386.73	761.872	146.927	713.727	2572.09	370.536	1495.73	1249.2	849.115	64.502	2786.69	121.184	16	ct16-spike	.84344932600734900952	4.9649619290511095571	.00028292999999999997622
ENSDART00000079292	147.16	64.3906	23.6735	60.0189	433.515	24.6131	116.012	50.4859	33.2083	120.868	221.128	98.4126	16	ct16-spike	.85339295853438801309	5.1771158791073101924	.00020739999999999999972
ENSDART00000079311	12198.8	8764.86	12119.3	218.034	10053	9394.28	5775.69	11374	9216.85	2432.72	6419.81	8392.64	1	ct01-box2	.83953806401229702505	4.886523461494290288	.00031786999999999999067
ENSDART00000079326	32.7091	22.1724	16.0283	19.2941	1326.24	30.9093	28.254	43.7064	35.144	53.5099	1005.13	150.27	16	ct16-spike	.98477665450666396207	17.915414930027498741	.0000000031384999999999998637
ENSDART00000079399	54.4406	68.6943	86.782	192.568	47.163	76.3984	91.8025	122.134	89.9185	174.204	89.4375	140.193	12	ct12-spike	.82405986764152394652	4.5999886793423998554	.00049007000000000000214
ENSDART00000079401	320.872	54.4033	96.9367	148.239	658.715	543.594	172.725	53.1344	71.4166	456.841	204.07	49.7412	17	cos_per_20_ph_17	.82891736545419403281	4.686096541143060179	.00042976000000000000529
ENSDART00000079424	135.225	151.43	276.066	144.416	123.508	121.45	175.919	198.543	312.019	276.285	83.7555	145.405	9	ct09-spike	.82327687215932598974	4.5864103505887001688	.00050036999999999998145
ENSDART00000079429	297.939	183.73	114.592	183.561	112.291	115.204	274.586	340.451	119.453	71.5446	99.9154	136.86	2	ct02-spike	.87132259267199196895	5.6150482653019100354	.0001114900000000000049
ENSDART00000079459	1910.26	1193.62	153.846	113.28	118.475	715.527	1469.59	1380.02	212.104	213.409	107.949	391.458	2	ct02-spike	.93534933049417201545	8.361951477174450531	.0000039875000000000003622
ENSDART00000079472	143.374	221.572	24.016	33.2772	34.8998	23.3506	37.5417	307.117	56.1218	72.8637	67.3727	31.802	3	ct03-spike	.92480706962682901473	7.6872150981569902228	.0000083345999999999997887
ENSDART00000079499	462.157	669.797	954.486	418.339	326.533	511.687	524.975	797.826	826.568	669.064	277.524	63.9206	7	ct07-rigid	.87025464093130699972	5.586631956733629778	.00011597999999999999748
ENSDART00000079518	3712.63	4205.73	5935.78	3308.03	2939.2	3063.34	3733.79	3777.69	4679.94	5036.59	2533.37	1729.87	7	ct07-rigid	.83663807386212096784	4.8300364748216599864	.00034587000000000002074
ENSDART00000079536	1445.54	1955.88	2097.03	1792.45	1630.44	1214.67	1599.1	1858.25	1801.78	834.711	835.872	1803.68	8	cos_per_20_ph_8	.81534832251253797075	4.453347338413290224	.00061437000000000004194
ENSDART00000079541	252.738	769.638	1412.01	807.995	239.763	290.45	294.89	978.021	1055.84	906.529	116.134	696.294	9	cos_per_21_ph_9	.87608469279245404504	5.7458911348093799631	.000093105999999999999308
ENSDART00000079549	273.411	285.862	291.001	316.762	957.111	201.933	327.905	314.913	297.675	84.4658	714.78	93.0727	16	ct16-spike	.92006306616137101262	7.4265328680989100008	.000011225000000000000101
ENSDART00000079555	17.6522	11.3487	13.071	52.0049	10.6999	41.7666	16.909	26.6922	36.4868	64.5238	14.7383	26.0794	12	ct12-spike	.81524898440177095971	4.4517293005024196617	.00061592000000000005251
ENSDART00000079559	924.311	1038.77	439.158	474.065	185.036	409.616	689.338	573.026	563.593	369.349	198.9	705.059	3	cos_per_23_ph_3	.8203287505146229508	4.5360070882495797662	.00054067000000000003945
ENSDART00000079591	664.689	564.017	1336.76	829.845	662.537	500.964	558.89	610.75	1046.66	634.896	332.202	903.261	9	ct09-spike	.82882785756650101394	4.6844799252035800308	.0004308100000000000037
ENSDART00000079592	5055.85	6328.91	3908.18	5429.68	1603.38	3196.23	7591.12	6757.5	4435.64	638.713	2330.52	3899.01	5	cos_per_22_ph_5	.83380635324206098247	4.776186257026430404	.00037501000000000000263
ENSDART00000079597	1053	1054.29	1397.13	1295.12	1061.68	874.394	953.588	1183.27	1310.35	1055.18	906.759	490.623	8	ct08-rigid	.8745861647903520053	5.7039692384317302043	.00009861400000000000146
ENSDART00000079613	31.0176	40.0601	22.4209	57.7901	32.6751	29.4166	34.1199	30.8196	24.5693	83.791	34.7784	42.299	12	ct12-spike	.88627097244372798901	6.0510232511291404123	.000061719999999999998605
ENSDART00000079669	358.36	221.954	629.808	389.626	345.832	317.397	336.026	514.496	772.598	454.466	282.273	193.088	9	ct09-spike	.86080681634654498957	5.3486732671310903697	.00016211000000000000475
ENSDART00000079676	528.82	670.713	1085.33	574.526	406.558	412.565	513.869	580.251	1080.41	818.726	325.637	330.729	9	ct09-spike	.90504902165328404706	6.7292909103690403683	.00002586500000000000054
ENSDART00000079723	17.3725	14.3427	16.763	37.8179	59.558	18.5966	36.019	27.1726	25.059	55.6078	48.5092	33.6532	14	ct14-spike	.84897647984658297649	5.0805142155519700253	.00023870999999999999641
ENSDART00000079734	2715.59	2709.69	3920.98	4002.32	2089.96	2616.83	3696.63	4552.26	4366.08	1681.26	1894.65	3076.23	9	cos_per_20_ph_9	.87187331928462896702	5.6298311934315901084	.00010922999999999999604
ENSDART00000079738	4954.73	7571.87	7719.7	7412.74	4111.77	5963.88	5171.56	7626.02	8500.79	5661.04	4487.25	980.43	7	cos_per_24_ph_7	.83931406803733299427	4.8821107629667901406	.0003199699999999999875
ENSDART00000079864	83.3822	15.3206	10.1579	19.8936	602.633	22.7622	23.969	23.1917	23.0441	54.3107	160.649	74.4888	16	ct16-spike	.81160480175727600649	4.3931695174315903429	.00067467999999999998459
ENSDART00000079899	356.968	600.195	1036.95	932.143	436.208	572.725	591.491	762.529	903.615	426.529	331.887	513.245	9	cos_per_21_ph_9	.8966908573434509977	6.4058252591462201408	.000038871000000000001037
ENSDART00000079941	47.6	19.0108	30.4943	12.2121	167.275	21.9676	45.6756	18.0871	16.9641	16.4174	64.8865	32.173	16	ct16-spike	.81868379224329701493	4.5083671927947603919	.00056420999999999999364
ENSDART00000080025	2570.86	2753.64	3655.26	3177.65	2418.89	2294.62	2220.98	2960.58	3286.98	2085.79	1870.9	1821.57	8	cos_per_22_ph_8	.852113209527474047	5.1487148653521899178	.00021613000000000000592
ENSDART00000080026	136.242	92.8228	18.2862	48.6793	24.3112	41.8596	74.6792	56.4565	31.1429	49.9462	31.5448	55.5553	1	ct01-spike	.81061081777443599883	4.3774606963953504035	.00069143999999999997998
ENSDART00000080039	347.026	643.692	686.01	420.282	304.261	307.826	422.989	581.329	312.6	141.298	204.985	279.033	6	cos_per_22_ph_6	.84847010101279796146	5.0696871625739303724	.0002425299999999999971
ENSDART00000080049	61.523	54.95	65.0254	119.983	90.5066	69.2827	56.8679	54.728	39.1564	105.913	137.157	87.2294	14	ct14-spike	.86159820174165502316	5.3677334553485200885	.00015777000000000000225
ENSDART00000080075	2178.64	1556.52	1036.04	834.837	561.717	674.975	777.727	1516.71	1214.12	649.171	355.125	653.007	2	cos_per_26_ph_2	.83864563192204200082	4.8689925352415404092	.00032630000000000001668
ENSDART00000080103	90.2063	260.856	303.737	518.581	403.224	250.845	64.5907	210.363	433.364	635.582	270.945	104.178	13	cos_per_22_ph_13	.93235412751602098069	8.1548670844861099738	.0000049752999999999996121
ENSDART00000080106	22.7472	18.8322	22.2038	12.9916	17.6951	72.8661	15.7097	14.5571	22.6711	20.2526	60.4715	71.5306	19	ct19-spike	.90581805286200001159	6.7610853936950796594	.000024867999999999999751
ENSDART00000080114	1738.42	2630.38	2279.18	2370.23	1453.92	1666.71	1769.17	2362.86	2271.65	957.354	1106.4	2191.61	7	cos_per_21_ph_7	.83567073850595197104	4.811498459206429601	.00035562000000000001379
ENSDART00000080160	148.897	172.958	46.3395	115.824	102.879	127.893	158.584	171.473	63.8822	74.3214	96.9848	101.27	2	ct02-spike	.84171917667484097425	4.929936964425290391	.00029799999999999997932
ENSDART00000080202	3038.47	2651.71	2218.67	1911.71	1595.95	1325.34	1669.61	1969.65	2485.69	2637.99	1013.92	1112.44	3	cos_per_28_ph_3	.83473876479083997104	4.7937785373448296156	.00036521999999999997608
ENSDART00000080269	968.221	1595.48	2457.01	1020.75	966.395	699.094	1084.75	1372.98	1605.61	1571.58	468.562	130.836	7	ct07-rigid	.88549824999104898016	6.0265474209013296658	.000063759999999999999402
ENSDART00000080313	561.831	531.106	577.174	579.013	374.047	253.554	716.978	796.833	635.808	165.016	115.781	227.159	5	ct05-box1	.81611201946710998367	4.4658258785431499405	.00060260000000000001064
ENSDART00000080372	3517.7	2314.5	182.5	135.687	99.9604	1056.76	2062.72	1820.62	101.272	112.966	148.556	892.946	0	cos_per_25_ph_0	.89861082510360501541	6.4767610578889698303	.000035509000000000001717
ENSDART00000080486	740.42	482.685	781.919	358.923	191.922	312.232	588.601	794.058	972.517	456.181	192.354	542.116	5	ct05-box1	.82285544736373295027	4.5791358961431303243	.00050597999999999994977
ENSDART00000080498	816.952	932.759	1632.53	732.188	823.186	742.584	1044.69	981.646	1305.75	649.117	525.012	850.136	7	ct07-spike	.88167644406495604414	5.9088254011253100728	.000074635999999999994882
ENSDART00000080536	77.8233	255.077	44.7122	198.054	128.664	145.86	67.5325	466.207	45.955	63.5261	91.1255	148.342	4	ct04-spike	.84195596705725295195	4.9346994340523799849	.00029589999999999998248
ENSDART00000080539	852.356	1781.45	2009.98	1301.38	1584.65	1489.4	918.253	1537.43	2002.56	1825.89	1666.24	1254.74	11	ct11-box2	.84831798801764202178	5.0664445120422696434	.00024367999999999999795
ENSDART00000080609	1177.52	762.224	602.069	555.282	507.887	459.244	900.779	519.675	530.932	158.129	232.628	544.569	1	ct01-spike	.83130390141058896347	4.7296291489906003846	.00040231000000000001569
ENSDART00000080671	1248.67	880.891	1723.88	1026.36	830.06	688.652	1066	1404.04	1766.74	1040.95	487.425	690.351	7	ct07-rigid	.83663984645862299327	4.830070582445549654	.00034584999999999997689
ENSDART00000080686	436.257	667.452	819.577	494.879	539.91	396.917	427.519	651.223	706.792	489.408	358.681	603.186	6	ct06-spike	.84783412524834300683	5.0561595253428199825	.00024738000000000000657
ENSDART00000080757	61.6054	22.1298	36.8266	45.2701	29.3196	43.2784	89.0141	33.9734	27.1198	22.3718	16.1091	23.7674	0	ct00-spike	.85959302676494397932	5.319730001315510215	.00016893999999999999187
ENSDART00000080847	129.72	127.592	137.133	127.156	75.3273	89.0004	83.7723	149.126	192.855	131.92	47.0959	67.7032	6	cos_per_25_ph_6	.86749626894735198945	5.5147228404913199995	.00012821999999999998871
ENSDART00000080852	873.532	1442.29	1156.88	1249.15	738.193	531.208	1270.97	1317.91	1483.83	922.985	829.089	653.781	7	cos_per_23_ph_7	.88577763156380695531	6.0353698407749103438	.00006301699999999999652
ENSDART00000080950	110.367	195.389	169.781	181.169	904.264	122.862	194.243	157.955	183.11	333.733	373.424	178.753	15	ct15-spike	.82458208925287301838	4.6090904029270500786	.00048328999999999998913
ENSDART00000080965	114.787	215.222	274.726	140.62	96.9797	132.039	112.275	160.726	166.764	148.694	111.192	77.3859	7	cos_per_24_ph_7	.81057927095517900984	4.3769639478757698114	.0006919699999999999766
ENSDART00000081035	438.064	367.347	624.155	313.693	305.416	241.492	420.236	455.776	671.622	348.554	108.153	389.432	7	ct07-spike	.81564156839282497824	4.4581306327237699705	.00060983000000000000748
ENSDART00000081039	1145.34	464.921	271.755	208.569	7531.28	121.186	444.31	441.178	426.401	353.402	3018.34	150.252	16	ct16-spike	.88506070356207899863	6.0127911799550002314	.000064937999999999993883
ENSDART00000081047	7024.59	8533.9	7907.51	5749.89	6197.73	5525.55	8864.18	8875.98	9118.9	6040.87	4306.4	6920.77	5	cos_per_23_ph_5	.89384982024791403976	6.3042208886264097245	.000044299999999999999372
ENSDART00000081099	27.5336	14.6594	33.2715	37.4125	29.1166	27.7506	25.7672	30.6989	33.4078	50.8427	27.2307	21.2526	11	ct11-spike	.81980954226379298966	4.5272461262428098649	.00054801999999999997416
ENSDART00000081129	18.5961	17.9791	14.2737	39.1263	15.4776	62.0271	21.4967	13.9142	31.7915	28.087	38.3093	67.6386	20	ct20-spike	.8734836672497100496	5.6735715440844103341	.00010283000000000000311
ENSDART00000081154	508.578	807.738	923.351	718.513	589.411	576.23	671.81	688.455	863.602	539.517	312.637	490.996	8	cos_per_22_ph_8	.87093626543556801334	5.6047308831558799724	.00011309999999999999795
ENSDART00000081170	203.857	134.902	118.17	229.264	226.289	188.472	167.867	138.979	150.413	202.17	171.252	195.529	18	ct18-box2	.84742587155467397064	5.047516638053860305	.00025053000000000000182
ENSDART00000081188	893.953	856.081	1385.32	1277.3	971.419	916.13	561.851	692.206	1184.29	1231.31	1457.13	398.022	12	ct12-box1	.83741182794366697539	4.8449730169567697402	.00033822000000000002453
ENSDART00000081214	1944.44	1545.18	2023.16	1405.01	1398.1	1305.39	1781.97	2014.65	1756.17	1032.23	927.12	1151.75	4	ct04-box1	.87715947931387094894	5.7763985637037800203	.000089304999999999999617
ENSDART00000081272	2116.63	2237.61	969.096	1768.56	2385.04	2341.26	2252.9	2068.33	917.086	494.844	1536.86	1690.56	22	ct22-box2	.81029206871472803098	4.3724466535924095822	.0006968799999999999821
ENSDART00000081279	33.5356	50.3112	107.693	68.134	31.1399	13.4495	42.0411	32.6283	50.6639	92.4171	12.488	26.8914	10	ct10-spike	.82352625060159601045	4.5907260904199702622	.00049706999999999995545
ENSDART00000081282	476.382	759.016	296.173	451.568	354.308	386.763	603.121	649.55	118.237	277.805	339.078	457.267	3	ct03-spike	.82774380074565501175	4.664991393289789734	.00044377000000000001514
ENSDART00000081296	52.7038	95.9417	44.801	71.6367	66.3879	244.377	35.5473	51.7114	89.6818	151.843	190.595	340.478	19	ct19-spike	.87606978618514996793	5.7454706250100704423	.000093158999999999993549
ENSDART00000081323	539.676	592.679	595.153	600.519	414.71	456.793	515.122	482.462	711.219	691.626	378.633	278.681	7	cos_per_25_ph_7	.81956421069599294515	4.5231183366975997728	.000551509999999999956
ENSDART00000081359	23.242	36.0279	32.1954	36.086	49.8127	48.2181	25.2613	25.5644	23.2969	40.5318	68.2937	33.555	17	ct17-spike	.83298173012093101875	4.7607394939446399107	.00038384999999999997898
ENSDART00000081367	1402.91	1702.7	1280.12	811.973	872.75	955.981	1623.3	2554.13	1599.97	355.987	614.028	1332.7	4	cos_per_23_ph_4	.87898265718658696866	5.8290142099498600814	.000083135999999999998203
ENSDART00000081428	50.904	21.8495	22.1376	42.6212	192.279	182.273	34.5513	18.4614	23.6899	41.5768	172.653	32.0866	17	ct17-spike	.86060314705889495723	5.3437922984656598402	.00016323999999999998884
ENSDART00000081458	277.522	173.551	80.0328	169.469	1520.3	79.1613	435.9	229.809	239.567	155.141	715.29	87.9479	16	ct16-spike	.87587476563628297033	5.7399756876742999978	.000093863000000000005782
ENSDART00000081484	912.689	1173.27	1364.05	1056.04	1071.98	739.313	1133.68	1152.85	1490.56	705.966	519.055	848.869	7	cos_per_22_ph_7	.82390256878450696121	4.597254313905099643	.00049211999999999997066
ENSDART00000081499	222.113	334.588	411.52	312.707	140.945	188.142	331.75	371.137	473.183	151.007	127.626	177.757	7	cos_per_22_ph_7	.92347369147947300227	7.6116010971020600095	.0000090795000000000000598
ENSDART00000081505	494.658	620.3	616.074	403.228	325.822	329.724	560.754	636.386	691.156	183.588	160.005	264.039	5	ct05-box1	.92401539651543995735	7.6420897793822604172	.0000087708000000000007962
ENSDART00000081529	209.865	268.49	282.328	126.047	1442.85	356.18	240.918	222.222	257.781	81.2885	566.746	19.9318	16	ct16-spike	.83076398155467301443	4.7197074483556695768	.00040840000000000000651
ENSDART00000081544	1296.35	1367.96	1249.09	1293.04	3454.14	1326.69	1656.66	1615.42	1307.68	638.027	2336.92	1359.59	16	ct16-spike	.87352669882411104751	5.6747510382539001483	.00010265999999999999627
ENSDART00000081596	499.604	739.462	153.328	811.218	774.367	956.109	881.79	726.691	294.711	800.829	1074.16	709.383	20	ct20-box2	.84226452653551897587	4.9409200699121003098	.00029317999999999998142
ENSDART00000081597	607.231	407.151	448.183	472.755	503.319	563.203	692.4	514.95	472.191	337.058	479.551	646.553	22	cos_per_26_ph_22	.86511051734952604253	5.454189988073819606	.00013960000000000000512
ENSDART00000081599	1666.37	2438.9	2438.21	2210.88	1582.91	1249.91	2110.75	1892.15	2119.46	1925.49	844.707	1610.69	7	cos_per_23_ph_7	.83544675048947802942	4.8072271964460400184	.00035791000000000002066
ENSDART00000081607	1307.65	2017.72	1987.33	1654.3	1106.23	1362.84	1893.13	1685.17	1820.69	519.758	1094.03	1700.64	6	cos_per_21_ph_6	.86344339587801000047	5.4127680312282295816	.00014800999999999998728
ENSDART00000081717	429.884	517.904	82.5867	233.507	181.846	226.356	314.176	400.922	67.8393	72.516	321.268	175.563	2	ct02-spike	.8188236666272009634	4.5107042737628599838	.00056218000000000001477
ENSDART00000081718	54.2317	39.5545	39.3125	65.1376	91.2425	59.2791	62.5815	41.8317	38.4098	75.8909	66.2711	84.7288	17	ct17-sine	.86541503645310402515	5.4618331566275202249	.00013810999999999999058
ENSDART00000081741	27.3601	24.2076	32.7495	65.7006	126.519	56.6205	43.2803	16.1174	16.1461	34.0237	42.4802	73.6979	17	cos_per_28_ph_17	.84706129331818003081	5.0398252336977797938	.00025337999999999998978
ENSDART00000081750	67.9449	88.1768	26.4746	35.2596	327.844	53.3269	125.546	102.09	124.863	99.9219	240.014	52.6118	16	ct16-spike	.90689637210327900263	6.806295749175579779	.000023519999999999998427
ENSDART00000081761	72.935	82.3745	82.2759	111.547	173.123	132.589	93.992	75.4404	82.6744	78.0697	143.744	84.9028	17	ct17-spike	.87615374881574004107	5.7478401043098097389	.000092857999999999997617
ENSDART00000081765	717.072	593.845	727.875	441.194	403.199	392.176	612.071	678.973	854.523	647.381	171.739	313.69	4	cos_per_26_ph_4	.86894209891921603273	5.5521515377275703074	.00012168000000000000051
ENSDART00000081875	37.3134	30.6637	55.8972	87.5778	33.4896	35.3917	52.201	28.0616	21.6104	110.312	33.1145	76.7661	12	ct12-spike	.82401799249497997835	4.5992604296706698364	.00049061999999999998841
ENSDART00000081912	224.009	195.049	45.127	233.863	273.796	203.174	263.166	256.139	52.7568	89.9415	183.297	206.497	21	ct21-box2	.85608242960609104433	5.2379342730767497471	.00018996000000000000407
ENSDART00000081945	196.28	264.159	483.323	260.335	252.333	274.148	193.833	289.241	529.465	394.922	269.019	237.288	9	ct09-spike	.92276583987859694957	7.5722264966740597814	.0000094956999999999995647
ENSDART00000081980	2542.54	1231.66	543.969	1454.21	902.626	1572.26	2314.43	1808.01	753.571	214.361	995.302	134.299	1	ct01-spike	.81677700827320698362	4.476748600240339826	.00059248999999999998715
ENSDART00000081989	126.796	118.628	266.031	194.542	96.1957	125.952	126.365	134.007	172.439	172.912	93.487	101.245	10	ct10-spike	.84936530375579000207	5.0888617852631199412	.00023582000000000000206
ENSDART00000082018	2121.68	1667.07	1843.54	871.23	186.531	564.46	1734.08	977.831	2762.14	505.142	63.2424	539.461	4	ct04-box1	.8559341196124640172	5.2345396284499301487	.00019089000000000001041
ENSDART00000082071	2411.82	3128.38	2536.37	1988.8	803.843	1099.3	1623.99	1916.42	1817.68	1132.75	918.942	1354.73	5	ct05-rigid	.82928904275563097848	4.6928217864614802934	.00042538999999999999122
ENSDART00000082112	412.777	623.37	842.024	535.897	399.464	407.759	537.035	552.048	828.241	512.035	456.003	273.233	8	ct08-rigid	.91235783056703201321	7.0473211827676900398	.000017549999999999999682
ENSDART00000082151	4637.24	6077.51	6744.12	2726.75	3678.31	2622.88	2950.01	4166.19	5949.99	6034.07	2030.42	448.974	6	cos_per_26_ph_6	.86299816985930200008	5.4018245739808197214	.0001503200000000000109
ENSDART00000082165	1731.98	2332.02	2184.17	2317.97	1296.2	1975.1	2144.27	2286.46	2143.73	939.467	1040.17	2531.47	7	cos_per_20_ph_7	.81347454892206294552	4.4230228994624702921	.00064402000000000003081
ENSDART00000082273	27.2176	15.9329	45.8503	56.296	44.8979	22.6819	28.9814	25.4358	27.1562	102.084	41.6148	35.2315	13	ct13-spike	.8479982869242710386	5.0596438934557701472	.00024612000000000000847
ENSDART00000082287	117.881	162.818	198.079	239.595	161.979	112.872	142.797	141.734	239.453	316.768	163.314	108.569	11	ct11-spike	.88396110173057296233	5.9785434559480403749	.000067973999999999996664
ENSDART00000082325	2015.32	3281.55	3948.7	1541.74	1282.48	1319.97	2781.01	2595.58	3374.39	3567.58	777.219	1689.04	6	cos_per_25_ph_6	.83009447676306902242	4.7074641415118900767	.00041605000000000000272
ENSDART00000082388	1042.66	852.811	1807.22	806.932	555.524	497.564	719.159	992.58	1480.92	1276.75	300.925	816.563	9	ct09-spike	.83130511483732194566	4.7296514959014599455	.00040230000000000002086
ENSDART00000082395	213.041	294.743	165.123	150.787	1731.02	143.851	189.314	198.478	164.649	419.804	598.497	59.8842	16	ct16-spike	.82525471898980395924	4.6208678466478696478	.00047466000000000001247
ENSDART00000082434	368.201	482.974	1048.46	1280.43	914.135	739.647	350.731	844.012	1056.94	1297.07	890.057	528.8	12	cos_per_23_ph_12	.96320385023674803815	11.332724273738300269	.00000024970000000000001909
ENSDART00000082454	536.066	542.03	871.049	529.607	532.693	450.897	562.706	629.631	747.266	296.268	377.667	604.943	7	ct07-spike	.81190521273032201233	4.3979391133856200469	.00066967999999999997147
ENSDART00000082465	303.739	319.898	31.8662	116.902	228.377	62.5769	622.837	229.879	130.069	125.163	96.3645	62.0244	1	ct01-spike	.84749977110525298585	5.049078759110719794	.00024996000000000002592
ENSDART00000082475	1471.58	207.345	123.986	93.0916	1772.75	2396.42	503.273	133.669	45.0289	156.23	611.307	2510.37	20	cos_per_25_ph_20	.87333909817274901766	5.6696130156057797933	.00010338999999999999775
ENSDART00000082517	558.921	708.209	551.233	690.103	396.156	492.954	715.692	953.951	571.091	277.82	223.859	822.392	6	cos_per_21_ph_6	.81074673211049996802	4.3796021280776900042	.00068913000000000003767
ENSDART00000082748	37.3923	97.8258	100.815	65.3498	22.0336	38.471	51.9545	61.2382	79.9044	87.1779	69.1897	55.4039	7	cos_per_27_ph_7	.84397136472927403172	4.9756344991789100973	.00027849999999999999322
ENSDART00000082952	758.852	766.271	883.585	871.674	399.174	537.327	662.99	858.447	949.975	1118.75	368	573.763	6	ct06-box2	.84317442071707104922	4.9593613758955399362	.00028529000000000000106
ENSDART00000083066	706.423	748.814	1119.67	749.985	668.463	454.345	749.762	735.164	1020.97	495.799	364.574	375.554	7	ct07-rigid	.83630343794056405393	4.8236065833120802537	.00034922000000000002085
ENSDART00000083203	141.816	65.6461	35.7389	27.5527	419.831	172.984	124.371	72.7046	84.9303	49.9642	203.265	35.7533	16	ct16-spike	.8119546145047480401	4.3987244410094801239	.00066885999999999996238
ENSDART00000083314	559.968	675.014	1246.92	987.504	553.228	633.392	769.916	1267.43	1782.14	791.745	402.478	1031.44	10	cos_per_20_ph_10	.84003249534278401356	4.8962936340225899912	.0003132799999999999821
ENSDART00000083330	413.297	159.746	57.6944	221.143	206.074	345.088	284.991	320.331	87.5729	118.018	205.73	373.366	22	cos_per_25_ph_22	.87093324893375301254	5.6046504932219001205	.00011311000000000000633
ENSDART00000083338	21.2639	30.003	9.5714	35.2554	81.9364	43.2297	16.074	18.1284	13.6504	18.8681	39.4993	86.1387	18	ct18-spike	.81946226809900502008	4.5214053465820800426	.00055296999999999995896
ENSDART00000083340	794.135	931.303	470.228	657.38	483.515	507.749	837.924	696.885	503.233	199.877	328.161	407.029	2	ct02-spike	.83557305073278898	4.8096346586720404304	.00035661999999999998388
ENSDART00000083449	170.343	218.356	414.778	101.03	251.479	91.8976	196.213	235.755	399.171	241.54	238.126	196.587	7	ct07-spike	.85299770539306596362	5.1683077396096903655	.00021006999999999999957
ENSDART00000083499	373.202	707.599	640.057	385.843	236.705	387.82	393.08	359.474	627.875	610.224	510.052	386.082	6	cos_per_28_ph_6	.81031268517431298548	4.3727706159654502471	.00069651999999999995167
ENSDART00000083778	992.213	876.428	224.984	578.035	519.302	500.353	796.747	820.625	406.493	177.891	414.305	751.261	0	ct00-sine	.82336131362914399823	4.5878707691633202614	.00049925000000000001928
ENSDART00000083848	329.572	388.091	481.613	507.655	263.185	258.287	531.013	727.967	592.143	239.207	174.515	271.005	8	cos_per_21_ph_8	.86989444542450700126	5.5771213326669899502	.00011751999999999999968
ENSDART00000083876	322.965	35.6356	112.403	91.0925	75.8733	135.607	224.419	141.271	109.31	105.909	54.5343	195.947	23	ct23-spike	.88654247667263796906	6.0596788081527401815	.000061015999999999999924
ENSDART00000083883	175.918	95.9412	185.426	192.345	266.083	192.766	176.01	186.742	252.051	273.516	155.622	151.19	14	cos_per_20_ph_14	.84231481110316597238	4.9419354008881901663	.00029273999999999999241
ENSDART00000083906	65.287	41.1884	74.7028	47.4398	471.586	62.0757	174.947	69.9238	77.2581	155.626	212.41	83.197	16	ct16-spike	.82572156864061996284	4.6290783832383501917	.00046875
ENSDART00000083908	203.111	246.891	313.816	147.272	1333.39	142.08	420.331	235.237	376.729	933.116	970.577	397.939	15	ct15-spike	.85239897726143598611	5.1550273088886298112	.00021415000000000000116
ENSDART00000083969	175.037	45.6983	37.2295	25.7736	572.205	80.8463	232.954	86.5422	113.165	84.9712	388.483	76.9702	16	ct16-spike	.90579972354375204446	6.7603232929128003192	.000024890999999999999362
ENSDART00000084116	774.857	1155.09	1124.86	911.808	345.166	429.023	847.397	1008.47	1525.79	564.847	306.869	934.773	7	cos_per_22_ph_7	.86481533683193401174	5.446804092554559773	.00014106000000000000808
ENSDART00000084184	1555.99	1906.5	3342.47	1302.14	1067.21	810.76	1603.02	1865.2	2541.03	3114.63	1198.89	307.752	7	cos_per_26_ph_7	.85911866693365002146	5.3085128567277699574	.00017166999999999998775
ENSDART00000084321	192.638	129.393	148.591	71.2413	564.623	96.9099	198.045	189.165	240.143	316.274	494.24	104.626	16	ct16-spike	.89824578885520001137	6.4631282135294298996	.000036130000000000001361
ENSDART00000084353	996.042	736.028	185.554	579.387	164.681	441.251	821.074	641.368	226.48	82.8495	138.642	170.625	2	ct02-spike	.8648296425089549988	5.4471615262606203345	.00014098999999999999012
ENSDART00000084378	44.22	37.4071	18.9904	34.147	24.6585	94.1191	39.1545	31.9538	17.6968	41.8335	30.9441	317.605	20	ct20-spike	.81342083509509299777	4.4221596673028900071	.00064488000000000001918
ENSDART00000084393	2126.48	2161.57	2375.69	2249.71	679.426	1607.09	1489.85	2136.11	2527.22	2305.2	940.945	1933.44	5	ct05-box2	.89380973247372597079	6.3028148526172902422	.000044379999999999998606
ENSDART00000084512	336.478	364.507	27.4441	281.231	337.194	269.897	413.447	500.249	84.7671	142.33	216.955	443.571	21	ct21-box2	.82440702453068703814	4.6060351374278303282	.00048555000000000001154
ENSDART00000084522	2968.59	4641.46	5124.06	2702.41	3325.45	2637.26	3531.95	4384.95	4486.37	3782.14	1871.07	3032.09	7	cos_per_23_ph_7	.86301033726230502729	5.4021229861290098739	.00015025999999999998776
ENSDART00000084631	79.1699	71.7455	41.5017	94.8429	236.956	357.202	110.448	67.1437	81.32	272.161	410.11	336.029	17	ct17-box1	.87872685615497903022	5.8215651201603497711	.000083980999999999994348
ENSDART00000084673	43.157	73.7019	42.4805	86.6009	52.096	59.2588	47.737	45.9085	53.37	161.657	84.5587	28.7062	13	ct13-spike	.81141535122965602334	4.3901668824401696156	.00067785000000000002369
ENSDART00000084729	767.753	751.611	1244.07	743.417	554.888	410.118	819.93	945.39	1460.95	651.792	442.517	381.54	7	ct07-rigid	.89112800574466299874	6.210428132068109619	.00005004099999999999743
ENSDART00000084792	1518.57	2158.32	1890.34	1799.74	1184.57	941.266	2023.65	2281.22	1646.3	1501.48	478.019	763.962	6	cos_per_23_ph_6	.87930532307519104762	5.8384420246311101721	.000082080000000000000182
ENSDART00000084827	2536.84	1282.17	3136.92	3175.4	1482.06	1730.04	1727.06	2170.91	3642.65	2788.04	1490.46	2506.99	10	ct10-spike	.83670665659426501914	4.8313564864172597879	.00034518999999999999337
ENSDART00000084858	878.292	1295.2	1809.54	1062.31	1114.78	806.259	1003.42	1199.67	1339.14	822.873	605.27	1026.15	7	ct07-spike	.82989975647309599527	4.7039155889031603053	.00041828999999999998127
ENSDART00000084914	183.425	237.602	391.898	173.162	167.725	185.075	178.251	234.481	314.406	160.051	116.818	143.913	7	ct07-spike	.94640450375281803819	9.266081158006599594	.0000015910000000000000985
ENSDART00000084923	1755.41	1783.81	2384.12	1814.13	956.204	1191.02	1282.81	1374.09	2042.86	1063.08	793.021	717.607	7	ct07-rigid	.81022595584156897885	4.3714080896852101077	.00069800999999999999331
ENSDART00000085076	190.567	159.985	137.038	143.418	111.069	93.1767	173.227	165.172	152.345	163.153	123.354	94.0606	6	ct06-box2	.86891778950139697546	5.5515174785394503232	.00012178999999999999776
ENSDART00000085087	556.381	516.896	561.821	461.373	236.945	436.126	643.76	561.881	638.249	465.86	271.688	286.057	3	cos_per_26_ph_3	.86275303976713202392	5.3958204596070595827	.00015160999999999999347
ENSDART00000085228	728.115	1441.19	1285.3	1041.72	539.825	702.604	805.319	1035.57	1010.88	302.058	366.067	640.029	6	cos_per_22_ph_6	.85662595980297895348	5.2504165518075103236	.00018657999999999999238
ENSDART00000085237	395.569	445.966	261.023	280.026	289.363	319.433	369.326	329.596	259.21	167.976	139.396	287.712	1	ct01-box1	.81664612546035197926	4.4745945734974004182	.00059447000000000004612
ENSDART00000085245	404.725	259.579	102.042	98.4283	57.3748	70.8897	280.25	69.8562	69.6959	154.532	62.5097	161.593	1	ct01-spike	.84783279001695499577	5.0561312059762704152	.00024739000000000000139
ENSDART00000085281	532.373	447.537	309.752	588.57	756.141	1111.46	378.465	407.889	229.564	402.338	827.304	624.193	19	ct19-rigid	.82613406527217203568	4.6363578786436603352	.00046357000000000000853
ENSDART00000085294	97.7771	162.967	310.759	203.348	217.624	57.6123	159.946	407.453	360.39	423.669	138.138	52.4339	9	cos_per_23_ph_9	.82388605373011702948	4.5969674205906496667	.00049233999999999996516
ENSDART00000085359	162.914	40.7668	86.2929	19.6263	411.41	375.569	87.5121	72.8488	125.118	63.5914	388.18	10.8484	17	ct17-spike	.81845977105556100284	4.5046292189173904319	.00056747999999999998097
ENSDART00000085367	805.044	1291.24	1724.59	1483.18	1150.37	939.95	910.089	1201.46	1538.49	1399.31	919.342	66.1294	9	ct09-rigid	.88412031574124805289	5.9834739183280101216	.000067527999999999994496
ENSDART00000085498	57.6472	109.323	29.0167	29.9813	40.811	24.6047	96.3367	90.6368	42.4778	23.7448	36.1212	36.5162	2	ct02-spike	.90565530006053795997	6.7543258060541297993	.000025075999999999998438
ENSDART00000085523	305.503	156.96	96.9438	261.702	243.254	316.996	318.087	142.431	79.3118	77.5622	103.943	223.887	21	cos_per_28_ph_21	.81979390178342004258	4.5269827430694498105	.00054823999999999996867
ENSDART00000085603	379.109	55.2155	64.2515	352.67	11378.6	112.069	193.572	324.767	43.5915	450.889	3321.76	34.7518	16	ct16-spike	.85010097098753101275	5.1047371768610902976	.00023042000000000000632
ENSDART00000085667	514.356	867.675	1558.86	688.717	663.417	813.801	713.495	860.7	1114.25	728.144	538.624	735.22	7	ct07-spike	.89644368772474203322	6.3968291211753696146	.000039322000000000000616
ENSDART00000085748	1799.52	1406.43	1049.21	889.319	917.181	1026.86	1683.49	746.251	820.724	161.82	826.829	1106.81	0	ct00-rigid	.82527987708732897243	4.6213095460376099055	.00047434000000000001553
ENSDART00000085761	1371.57	1546.52	456.628	741.352	853.426	967.908	1359.16	1079.33	430.666	195.059	682.472	794.998	2	ct02-spike	.83254871576334199545	4.7526698837023095834	.0003885499999999999848
ENSDART00000085804	380.428	466.947	65.2038	486.907	462.191	442.42	458.879	397.176	154.245	135.995	419.146	420.188	21	ct21-box2	.8364830959512320474	4.8270564027400295615	.0003474199999999999771
ENSDART00000085945	1115.47	693.621	492.141	520.205	375.027	442.583	706.398	657.309	546.204	135.586	272.974	303.992	1	ct01-spike	.81183014085581095554	4.3967462452825198937	.00067093000000000002896
ENSDART00000085968	218.559	272.133	111.082	186.821	318.845	373.853	280.635	243.877	94.0077	66.0324	197.663	221.495	21	cos_per_28_ph_21	.8217247880129260329	4.5597341605596204417	.00052128999999999999122
ENSDART00000086143	26.4749	16.7543	14.9222	17.8043	41.2997	55.5707	21.4187	23.2592	24.438	61.994	44.3207	22.2084	17	cos_per_21_ph_17	.81023001678798101111	4.3714718688896203602	.00069793999999999997534
ENSDART00000086244	277.577	214.034	74.9148	226.292	1181.52	941.037	114.793	117.047	161.339	1604.54	1790.03	217.536	17	cos_per_21_ph_17	.8391771891111969861	4.8794184047156301531	.00032126000000000002428
ENSDART00000086334	3297.9	3185.65	6366.11	2971.94	2171.74	1888.03	4302.17	2918.31	5345.34	4561.72	2142	3256.68	9	ct09-spike	.83228672098432798787	4.7478011736278400434	.00039141000000000002179
ENSDART00000086533	317.008	259.536	63.974	365.802	286.528	492.314	271.447	248.123	141.969	126.069	538.3	462.858	19	ct19-rigid	.82516654222440000144	4.619320412518029606	.00047579000000000002367
ENSDART00000086729	28.6007	41.5601	50.3919	29.6131	38.0616	29.5497	17.4435	33.1008	46.7008	43.1652	38.9854	22.0595	8	cos_per_27_ph_8	.82168607601809595664	4.559072826094910269	.00052181999999999998784
ENSDART00000086834	8419.18	7289.29	993.941	3827.06	1578.57	6939.81	8151.55	2018.88	502.493	1525.43	1652.05	4599.85	23	ct23-box1	.81290363038128898854	4.4138647714813501466	.00065326999999999995749
ENSDART00000086952	219.192	123.865	222.722	148.549	1192.01	483.045	182.119	285.536	300.635	195.172	559.455	42.1135	16	ct16-spike	.82810399804364798193	4.6714482733072202336	.00043942999999999998555
ENSDART00000087062	121.29	165.747	67.5296	153.637	124.994	286.7	126.878	133.331	77.7241	66	76.6405	261.361	20	ct20-spike	.88354222806403603929	5.965617332739830303	.000069159000000000006494
ENSDART00000087070	2119.16	1678.47	783.847	943.836	591.942	1231.41	1788.32	865.551	539.62	168.802	795.347	760.328	1	ct01-spike	.8357808441362459817	4.8136009967749000538	.0003544999999999999974
ENSDART00000087071	311.674	227.611	401.789	193.93	190.675	156.202	185.978	217.247	397.474	220.605	94.4556	106.916	7	ct07-spike	.82608498390024298619	4.635490491913460076	.00046418000000000001794
ENSDART00000087084	62.3711	35.1471	94.4154	38.1084	38.7085	135.335	109.34	29.9458	49.9566	62.9749	69.8205	121.882	21	ct21-spike	.8219038203276579635	4.562795179877159768	.00051884000000000001299
ENSDART00000087096	553.117	386.943	150.94	398.227	335.448	301.611	803.859	498.299	177.666	121.136	198.962	357.372	1	ct01-spike	.84683149494760301401	5.0349901911624401762	.00025517999999999997933
ENSDART00000087107	4952.35	4899.09	1074.89	3913.48	4000.87	5427.95	3805.55	2866.69	1808.18	5183.64	6642.29	2825.42	19	cos_per_20_ph_19	.83642326176098202861	4.8259068828903801673	.00034801999999999999168
ENSDART00000087144	695.722	745.713	2553.5	1131.35	1050.42	695.504	875.28	1536.49	3209.66	2077.43	835.735	923.792	9	ct09-spike	.91639839107375298255	7.2399255697855497971	.000013957000000000000371
ENSDART00000087191	188.31	209.298	31.506	147.381	228.216	345.81	210.779	189.06	77.5354	202.328	213.729	179.663	21	ct21-box2	.8145549889234680041	4.4404579725139701196	.00062679000000000000773
ENSDART00000087202	2339.74	4047.94	3984	1785.05	656.39	1235.73	2582.93	2768.98	2574.03	2163.33	542.249	1669.31	6	cos_per_23_ph_6	.9125801279844519831	7.0575847951758499121	.0000173349999999999992
ENSDART00000087338	669.068	1010.92	1195.37	530.896	652.693	509.62	925.593	1116.19	1215.51	535.566	398.9	649.354	6	cos_per_23_ph_6	.89936591666913900944	6.5051835829995203753	.000034251000000000001225
ENSDART00000087339	534.363	1018.37	1353.33	603.432	477.366	558.078	506.914	585.578	1192.77	970.464	478.563	638.486	7	ct07-spike	.8476813868057070378	5.0529222614426299032	.00024855999999999999189
ENSDART00000087422	674.537	509.913	254.093	307.527	5449.98	93.8289	2689.33	549.579	233.637	138.959	3438.26	35.2455	16	ct16-spike	.87814666332841595509	5.8047509469132201332	.000085921999999999994907
ENSDART00000087457	1187.52	1343.93	1477.53	1181.69	628.886	814.891	1725.99	1413.16	1550.56	460.921	591.819	1048.06	6	cos_per_22_ph_6	.87417558923630700463	5.6926054443702200913	.00010016999999999999808
ENSDART00000087477	686.241	671.072	822.348	491.257	438.943	604.783	705.992	679.199	906.272	215.439	318.644	343.316	4	ct04-box1	.84419098339865794589	4.9801390500168603026	.00027666000000000002439
ENSDART00000087494	103.88	83.3994	78.8347	231.536	135.537	162.331	107.538	58.8225	63.8784	199.44	164.143	66.2125	13	ct13-spike	.8569557547072540471	5.2580223302224098347	.00018455000000000001351
ENSDART00000088043	27.2364	39.296	48.2917	38.8614	26.3852	31.0649	36.0337	63.2362	46.961	58.0568	24.2724	32.5941	8	ct08-box1	.8137653832241790175	4.4277026991283596757	.00063935000000000000945
ENSDART00000088092	1562.98	2027.08	2677.65	1543.98	1111.83	844.426	1371.68	1572.12	2060.05	1960.28	646.451	499.488	7	ct07-rigid	.91608495561042302402	7.2245109922935402125	.000014212999999999999275
ENSDART00000088159	311.814	638.231	435.84	422.482	156.115	251.297	285.671	470.327	603.535	153.698	181.589	317.975	6	cos_per_23_ph_6	.8419493799504109699	4.9345668179450301594	.00029596000000000000562
ENSDART00000088166	1272.85	1952.14	2793.66	1710.69	1410.85	1355.39	1352.52	2157.43	2627.45	1645.89	750.144	2219.48	8	cos_per_21_ph_8	.82512494822482995716	4.6185908373328397047	.00047632000000000002029
ENSDART00000088172	104.773	44.9342	55.936	73.952	95.5244	106.665	88.9081	73.3483	33.5959	55.3914	53.5844	87.0159	21	cos_per_27_ph_21	.85869375398337299821	5.2985093454561802417	.00017414000000000000984
ENSDART00000088178	186.151	229.724	238.835	153.915	88.7139	125.713	125.935	193.29	264.899	170.829	162.555	64.7266	5	cos_per_27_ph_5	.93019024755881096755	8.0133419287682805532	.0000058020999999999998953
ENSDART00000088195	42.1258	37.8971	113.676	29.9269	22.7683	20.6564	20.3444	31.9253	66.423	39.8911	32.0993	40.8848	8	ct08-spike	.87377175698500197942	5.6814787925589103068	.00010171000000000000028
ENSDART00000088325	343.875	1141.27	61.8483	650.971	419.204	502.43	300.527	957.987	77.8406	106.077	249.829	255.094	4	ct04-spike	.85579036524458496071	5.2312538682488201047	.0001918
ENSDART00000088329	2993.96	2946.74	1579.02	2323.72	1616.26	2228.82	2900.18	2480.73	1859.04	626.161	1120.53	2256.04	1	ct01-sine	.83478276865675304919	4.7946121262255099182	.00036475999999999999743
ENSDART00000088358	292.785	278.823	333.445	296.911	108.314	177.537	242.449	269.496	399.708	121.539	132.96	176.841	5	ct05-box1	.81272414895202904628	4.4109934665643102392	.00065618999999999996341
ENSDART00000088403	401.074	324.997	31.2358	140.474	7160.05	309.708	2348.66	497.681	444.402	43.3371	5913.94	357.515	16	ct16-spike	.96243425501040202885	11.209274665936000304	.000000276559999999999983
ENSDART00000088425	871.852	850.816	1349.48	928.15	964.455	632.267	756.003	989.112	1679.12	1141.85	878.29	221.776	8	ct08-rigid	.88131790944252497155	5.8980562052871903234	.000075725999999999999692
ENSDART00000088488	137.641	113.271	87.5074	45.1735	59.5281	66.102	114.696	122.57	114.717	119.928	66.2968	29.5074	1	cos_per_28_ph_1	.92559043236607096983	7.732545898394749706	.0000079201000000000006232
ENSDART00000088508	899.868	1424.05	1493.99	1358.32	843.07	910.774	934.142	1109.75	1725.97	816.201	1011.95	537.147	8	ct08-rigid	.84031044802865495491	4.9018042756597202114	.00031072000000000000661
ENSDART00000088514	17.6116	25.6762	34.5167	23.5459	53.6207	35.7213	11.8007	23.4695	27.5324	57.4242	101.475	25.4145	15	ct15-spike	.81873353142535698623	4.5091979772445203167	.00056349000000000004119
ENSDART00000088542	27.0485	47.6409	42.7271	41.54	130.464	51.9835	40.1581	45.0614	32.3433	117.142	105.002	39.1352	15	ct15-spike	.84900682466567900519	5.0811646157966103843	.0002384900000000000019
ENSDART00000088735	8959.74	7892.39	2442.94	8289.72	2111.9	8545	8783.51	8441.34	4596.02	420.176	2894.07	8036.02	0	ct00-box1	.81419361804907997016	4.4346113386081800201	.00063252000000000002233
ENSDART00000088791	46.5726	73.5793	77.4702	34.7886	297.621	87.0875	66.1687	54.4739	62.9016	122.24	259.974	182.504	17	ct17-spike	.9369258612103109618	8.4766268019704007486	.0000035339999999999999608
ENSDART00000088901	204.897	225.46	487.952	220.329	345.94	218.783	290.744	267.719	620.942	211.674	129.099	190.044	8	ct08-spike	.90136871760266501497	6.5820620103489098085	.000031084000000000002579
ENSDART00000089070	674.304	357.139	257.55	382.106	3157.19	493.023	1414.5	713.211	718.439	225.925	2040.21	447.251	16	ct16-spike	.89492892029322002045	6.3423540685807395789	.000042172000000000002128
ENSDART00000089078	6120.29	4973.52	2004.32	3484.68	3438.77	3839.61	5717.44	5418.34	3470.64	688.602	3699.5	4459.87	0	ct00-rigid	.85133716416091098633	5.131657069064580412	.0002215499999999999913
ENSDART00000089095	497.781	506.549	795.264	505.613	382.505	350.867	602.89	582.659	661.033	633.314	246.669	155.862	7	ct07-rigid	.86080594330029502892	5.3486523232831402197	.00016211000000000000475
ENSDART00000089232	4996.91	4409.25	3471.78	2653.98	904.164	1725.79	5675.76	3564.4	2749.13	826.02	1306.24	1159.67	3	ct03-box1	.88539748402596596399	6.0233728330183398114	.000064029999999999995123
ENSDART00000089233	1440.8	1068.93	765.343	744.436	735.452	1166.72	1301.8	734.312	977.494	497.412	760.266	1013.74	0	ct00-rigid	.86457244253102805143	5.4407432906421897556	.00014227000000000000497
ENSDART00000089286	458.482	909.34	620.531	452.971	195.569	519.65	443.14	920.562	407.104	251.906	151.868	106.05	4	ct04-rigid	.86170189946740505249	5.3702421840013601084	.00015720999999999999406
ENSDART00000089526	25.5845	53.2403	54.134	49.2717	31.136	23.1325	36.0487	55.0811	51.8479	72.5992	48.1892	40.3042	8	cos_per_26_ph_8	.8264542671893240211	4.6420247901427895698	.00045958000000000001455
ENSDART00000089544	559.055	752.916	877.758	442.012	396.346	437.868	679.581	613.872	791.296	516.487	169.341	227.117	5	ct05-box1	.89544947757406501143	6.3609484687766597588	.000041174999999999997951
ENSDART00000089547	719.081	1012.2	2069.25	1086.83	855.226	1067.58	1067.46	1068.63	1827.57	2068.08	763.425	1085.73	10	ct10-spike	.82626446833172995099	4.6386640318875196343	.00046193999999999998517
ENSDART00000089549	698.667	913.76	809.107	612.727	599.651	598.721	741.74	833.945	784.634	365.758	541.881	413.096	4	ct04-box1	.85313907377753894767	5.1714543452926600153	.00020911000000000000876
ENSDART00000089651	145.175	142.418	156.483	209.769	128.959	285.101	98.2099	127.26	135.422	109.53	210.514	378.598	20	ct20-spike	.87771612768318996167	5.7923463018520804368	.000087385000000000004447
ENSDART00000089789	94.565	319.474	34.7742	185.128	78.6937	98.2719	105.001	221.317	81.2498	110.746	78.3426	124.021	4	ct04-spike	.85285733119684103976	5.1651873949933602148	.00021101999999999999555
ENSDART00000089834	2193.07	2818.61	2762.23	2186.43	1123.93	1548.61	1948.25	2015.52	1993.99	1022.66	1139.72	2083.43	6	cos_per_21_ph_6	.83357546448461394828	4.7718507517296000486	.00037746999999999997569
ENSDART00000089953	2155.59	3981.98	2453.28	2491.84	872.939	1770.77	2747.4	3139.15	1922.41	186.91	982.999	2410.24	5	cos_per_22_ph_5	.89026508228857204053	6.1813817103733699199	.000051977000000000000578
ENSDART00000089961	370.383	834.932	191.238	335.564	151.127	295.878	282.037	1022	204.006	93.9903	128.299	390.885	4	ct04-spike	.93278669170311101499	8.1839457497963401522	.0000048219000000000003693
ENSDART00000090066	804.055	1349.55	119.952	1167.55	955.333	800.476	1166.87	1234.53	165.329	682.586	788.938	1056.2	20	ct20-box2	.85211509403746099611	5.1487564379241002044	.00021610999999999998917
ENSDART00000090221	583.24	651.145	1309.2	868.609	995.684	459.562	741.997	815.412	1086.14	761.157	417.814	669.985	10	cos_per_21_ph_10	.81755862422197100869	4.4896555313217803018	.00058076999999999998417
ENSDART00000090234	23.1433	15.0191	23.4372	33.0693	20.5171	18.1473	29.9222	15.5453	29.0467	50.2545	19.1803	22.5965	11	ct11-spike	.82819138421436500064	4.6730175255214998487	.00043838999999999998195
ENSDART00000090280	1210.98	1042.69	2208.69	2111.7	503.585	1061.26	1665.45	2585.85	1901.87	977.214	1012.25	2242.26	8	cos_per_20_ph_8	.85796186243738503663	5.2813761654144704139	.00017846999999999999041
ENSDART00000090316	1823.41	2189.67	1729.25	1529.66	1188.94	1443.38	1823.55	1553.21	1700.5	1072.18	1018.68	1479.96	4	cos_per_23_ph_4	.86579442618070101556	5.4713892556858896299	.00013625999999999999983
ENSDART00000090341	1049.98	1630.61	1726.55	1577.73	861.276	1305.94	1325.79	1405.96	1817.8	1226.29	746.476	1483.26	8	cos_per_21_ph_8	.8144871067693979505	4.4393585347322401802	.00062786999999999999061
ENSDART00000090369	343.032	431.338	312.377	422.572	274.033	269.393	378.982	345.167	363.203	360.018	178.702	259.732	6	ct06-box2	.83767313527464004608	4.8500392591515604224	.00033566999999999998965
ENSDART00000090370	559.97	335.33	266.365	246.727	140.842	296.03	437.348	409.602	206.216	90.6402	94.6164	209.622	1	cos_per_25_ph_1	.8905129289428600492	6.1896912207398600003	.000051415000000000001554
ENSDART00000090390	1911.68	2720.4	2455.15	2772.05	728.936	1727.43	2401.52	2728.53	3227.64	1681.12	1211.34	1286.48	6	cos_per_23_ph_6	.8674674666890549446	5.5139830155060396422	.00012835000000000000272
ENSDART00000090475	1836.95	1474.37	2409.1	1496.98	1555.15	1643.67	1529.24	1783.96	2788.21	1399.19	1911.27	1230.82	8	ct08-spike	.88583780014282198501	6.0372738476837302102	.000062856999999999998052
ENSDART00000090491	20.5082	24.7426	14.337	50.7978	58.0029	108.929	42.5322	23.7081	15.9373	30.1692	37.3674	62.1882	19	cos_per_28_ph_19	.85978389053193304825	5.3242581764862100258	.00016784999999999998706
ENSDART00000090520	382.245	596.294	642.205	472.365	381.007	430.37	520.641	478.289	492.765	325.765	308.961	324.326	7	cos_per_22_ph_7	.81891523301527802126	4.5122355242738798609	.00056084999999999999871
ENSDART00000090624	1399.49	2134.23	1432.16	1269.4	636.529	1228.39	1976.33	2082.66	931.965	163.399	226.099	508.069	4	cos_per_23_ph_4	.86117351695856203531	5.3574863461843396095	.00016008999999999999359
ENSDART00000090644	759.117	1248.4	781.476	505.896	533.395	432.079	962.546	741.04	860.938	269.725	229.673	583.527	4	cos_per_23_ph_4	.863477538378576992	5.413609285794420245	.00014782999999999999917
ENSDART00000090754	1558.84	1371.5	259.879	1024.82	546.663	799.857	1014.78	1211.72	218.624	106.319	329.56	351.831	2	ct02-spike	.82753835516867302324	4.6613167950536196216	.00044626000000000002688
ENSDART00000090793	384.608	508.054	338.268	478.203	198.453	308.783	460.496	534.173	441.596	134.275	185.859	507.119	6	cos_per_21_ph_6	.81012081309405303831	4.3697574076666896303	.00069981000000000003706
ENSDART00000090908	160.947	238.635	338.737	133.488	73.8519	128.228	115.565	184.529	229.465	287.397	257.481	133.073	7	cos_per_28_ph_7	.84028688409577800833	4.9013365916776896469	.00031094000000000000111
ENSDART00000091021	38.4288	28.7955	16.7246	34.6379	310.345	196.262	22.262	19.3772	14.0568	41.3963	921.541	19.4617	16	ct16-spike	.8479839035033109873	5.0593383951293100509	.00024623000000000000572
ENSDART00000091252	1974.22	1901.27	2734.35	1745.93	1142.68	1388.42	1719.38	1968.2	2143.4	881.461	285.075	887.109	6	cos_per_23_ph_6	.83466715648769795877	4.7924226701941901041	.0003659600000000000266
ENSDART00000091331	12515.3	8154.81	1534.8	1382.7	640.394	2740.83	9592.82	2008.26	1227.79	420.942	874.82	724.028	1	ct01-spike	.92416437001375195681	7.6505293770339202197	.0000086873999999999991891
ENSDART00000091353	77.2844	44.1255	173.919	105.495	74.111	47.4601	83.3358	99.5822	172.619	173.304	68.4307	109.366	10	ct10-spike	.84369470818197700446	4.9699724321263500926	.0002808399999999999742
ENSDART00000091360	180.301	112.427	16.5336	49.3091	22.7137	38.1896	125.656	219.003	70.1535	117.617	36.4538	51.1795	2	ct02-spike	.82843993226707801636	4.677486806846260059	.00043542000000000000192
ENSDART00000091428	88.8551	73.8669	76.9271	171.421	112.281	129.487	89.8364	104.512	109.229	169.543	89.9886	69.712	12	ct12-spike	.86359980074863895716	5.4166241714470100277	.00014720000000000000012
ENSDART00000091479	823.653	866.999	629.483	428.117	429.531	369.095	477.094	530.506	659.486	714.061	260.587	197.309	3	cos_per_28_ph_3	.85749692198654503539	5.2705555606068204	.00018126000000000000944
ENSDART00000091508	616.16	441.472	326.651	197.385	282.53	504.092	861.596	834.129	89.0107	60.4062	330	245.311	0	cos_per_25_ph_0	.82606127750653801645	4.6350716614860498765	.00046448000000000002523
ENSDART00000091529	1106.27	814.973	649.141	686.94	380.363	631.934	1082.92	672.011	483.263	476.069	352.173	346.431	1	ct01-spike	.89300234154612301296	6.2746554810738102148	.000046029000000000002638
ENSDART00000091556	17.1803	27.6973	21.7982	20.543	1410.12	41.9925	54.9647	90.0396	51.5009	109.444	1745.89	23.4073	16	ct16-spike	.99174897837751296858	24.464176289742098902	1.4851999999999999481e-10
ENSDART00000091616	1302.1	1083.4	763.236	672.98	634.511	611.859	692.956	1099.16	832.439	370.764	312.886	536.79	2	cos_per_25_ph_2	.8395194747112210143	4.8861569332801302323	.00031805000000000000588
ENSDART00000091620	89.9065	83.5546	106.154	86.8808	270.462	150.633	160.91	102.115	64.2566	179.455	420.799	54.0332	16	ct16-spike	.88075259590354604278	5.8811686036073798078	.000077471000000000004161
ENSDART00000091726	50.484	54.4353	117.763	83.1777	33.5264	29.2284	42.3054	44.5691	116.069	122.398	57.2678	95.1972	10	ct10-spike	.83995943009464002493	4.8948472315364597307	.00031396000000000000947
ENSDART00000091773	1713.43	1994.17	922.656	1523.41	560.249	886.634	1896.46	1555.41	773.555	41.8875	254.87	654.079	2	ct02-spike	.82021972898467798707	4.5341646558339601114	.00054219999999999995196
ENSDART00000091774	439.487	523.703	462.86	521.524	285.236	337.558	455.417	495.149	381.311	345.623	194.091	341.684	5	ct05-box2	.82945806083771100869	4.6958866427080696582	.00042341999999999998128
ENSDART00000091899	283.328	411.419	433.006	322.664	182.567	157.527	348.252	311.907	409.733	163.483	118.995	49.6251	5	ct05-box1	.88849099260355002272	6.1226663777702796665	.000056144000000000003202
ENSDART00000091959	324.378	334.073	684.786	377.149	344.731	321.166	402.443	472.727	708.187	526.503	311.883	422.2	9	ct09-spike	.90911342592998001244	6.9016405869601795686	.000020930000000000001202
ENSDART00000092009	1330.28	875.254	1989.54	1593.42	1225.43	1071.76	1024.95	1516.27	1867.82	1527.49	945.31	1417.94	9	ct09-spike	.83619240824690599378	4.8214771601784400801	.00035033999999999998302
ENSDART00000092011	179.507	132.512	73.7559	137.837	100.562	164.751	184.036	164.976	93.1653	54.8716	79.5886	93.7763	23	cos_per_28_ph_23	.82519859040958898344	4.6198827109403701741	.00047538000000000001912
ENSDART00000092032	127.542	183.192	171.533	128.321	88.3091	80.3294	122.539	141.403	125.572	96.897	68.2385	129.796	6	cos_per_22_ph_6	.88887052709058200772	6.1351160751958202511	.000055231000000000000255
ENSDART00000092104	1229.24	1431.54	2552.34	1395.97	1066.21	983.085	1726.74	2551.94	2307.48	1630.56	674.943	1534.42	8	cos_per_21_ph_8	.89429968617036303957	6.3200511958129199641	.000043402999999999997626
ENSDART00000092155	197.419	94.048	53.4571	80.7879	2259.98	92.0523	488.42	172.769	172.559	192.365	1085.02	166.802	16	ct16-spike	.90538363048601400163	6.7430795508754197698	.000025428000000000001166
ENSDART00000092180	190.609	107.627	49.5109	129.957	146.756	185.451	195.824	144.39	55.7296	34.8871	38.2919	57.2443	23	cos_per_28_ph_23	.83435511839728604411	4.7865237279640400203	.0003692200000000000191
ENSDART00000092239	481.743	590.236	428.631	495.536	476.437	389.955	478.714	757.67	402.67	396.348	457.768	548.231	4	ct04-spike	.82531114030936103543	4.6218585530026601305	.00047395000000000000063
ENSDART00000092277	1101.41	1367.03	1037.89	924.651	624.784	861.106	1341.21	1156.14	633.265	211.734	470.862	902.697	4	cos_per_22_ph_4	.88325494596010500903	5.9567897890576597675	.000069981000000000006416
ENSDART00000092297	540.943	1121.88	337.553	757.438	413.721	585.142	634.207	1171.93	678.175	180.576	269.128	417.147	3	ct03-spike	.84273079382309001861	4.9503518692562797909	.00028912000000000002368
ENSDART00000092319	83.8336	16.0797	48.6407	46.7901	71.9275	151.556	66.4526	27.2124	42.3963	109.857	102.469	79.795	18	cos_per_22_ph_18	.82054690133356500414	4.5396983163045900866	.00053759999999999994857
ENSDART00000092351	48.4136	27.8356	109.098	55.6318	50.4451	43.8735	65.1983	33.7027	72.1659	62.31	33.4749	42.4619	9	ct09-spike	.82747344796236899089	4.6601571011297000524	.00044704999999999999729
ENSDART00000092355	1143.44	2351.65	3111.45	1722.17	1212	1327.16	1566.26	2051.57	2585.66	1890.02	701.426	1614.13	8	cos_per_22_ph_8	.88886671385327098438	6.1349906929201800665	.00005523999999999999966
ENSDART00000092374	126.267	58.9616	26.0167	116.931	307.381	205.087	105.888	119.759	62.5778	143.422	275.4	73.031	17	ct17-spike	.85926713887327299535	5.312018122516829699	.00017080999999999999938
ENSDART00000092492	153.696	60.8435	62.5199	53.3305	222.924	114.146	108.36	41.3426	89.5635	232.47	168.806	74.3888	17	cos_per_20_ph_17	.86497040272769898372	5.4506812919616001167	.00014029000000000000021
ENSDART00000092498	1329.7	1438.62	276.86	1165.37	1649.39	1589.86	1450.5	1608.56	342.646	937.099	941.121	1023.26	21	ct21-box2	.88174783346674301399	5.9109751796337404173	.000074420999999999997787
ENSDART00000092552	799.008	900.77	260.113	484.943	256.912	393.825	933.497	1312.27	265.221	63.9762	95.3956	172.202	2	ct02-spike	.91226208726812296756	7.0429121266801102408	.000017643000000000000317
ENSDART00000092672	527.312	1192.22	904.771	344.39	114.404	187.091	314.722	546.342	804.295	1048.46	314.177	368.478	5	cos_per_28_ph_5	.88420185730859401918	5.9860027523637198144	.000067299999999999996002
ENSDART00000092705	446.606	778.876	119.836	323.227	84.6882	315.989	814.896	568.397	148.264	90.4889	252.171	83.0397	2	ct02-spike	.88466851779577804216	6.0005235951510300652	.000066007999999999995497
ENSDART00000092737	166.72	329.085	251.454	138.579	111.632	124.895	225.222	203.778	181.247	137.803	79.3002	185.176	5	cos_per_22_ph_5	.88261846531886301026	5.9373405610303002788	.000071829999999999994981
ENSDART00000092784	68.8805	110.929	15.0909	105.726	77.6588	103.107	92.5494	71.9985	41.1335	77.7628	82.3589	74.1712	20	ct20-box2	.83532192550071104886	4.8048503325744897907	.00035919000000000000841
ENSDART00000093074	307.577	474.681	565.712	275.205	289.788	257.691	362.999	484.603	562.587	499.098	236.564	193.415	7	ct07-rigid	.91247490953545395964	7.0527221421608601304	.000017436000000000000435
ENSDART00000093152	4419.54	3491.5	2535.76	2372.32	1279.53	2007.18	2513.99	2690.81	2109.44	1173.19	706.221	1704.04	2	cos_per_25_ph_2	.81424450961343897148	4.4354337885904904226	.00063170999999999995385
ENSDART00000093247	64.1579	88.4927	222.373	51.6459	59.3687	43.4813	63.8136	41.5102	118.74	103.617	45.7124	86.0075	8	ct08-spike	.81461905496547304395	4.4414961007568303231	.00062578000000000004281
ENSDART00000093281	91.6824	114.011	224.148	202.1	180.704	131.098	120.84	116.514	202.325	304.358	135.144	77.4282	12	cos_per_23_ph_12	.8711224017862480018	5.6096965092562003363	.00011231999999999999526
ENSDART00000093331	422.12	520.892	69.192	496.156	395.067	447.292	608.861	622.917	149.2	128.681	477.551	553.067	21	ct21-box2	.82328034540213301806	4.5864704018186897017	.00050031999999999995313
ENSDART00000097183	29.4927	47.2443	27.9954	203.221	25.4072	40.3122	17.3488	36.2491	47.0366	103.666	35.771	52.6421	12	ct12-spike	.88958492545613998548	6.1587137936144902284	.000053545000000000003183
ENSDART00000097189	738.544	751.875	413.741	421.103	506.968	611.357	1056.72	957.949	395.65	226.846	543.887	532.941	2	ct02-spike	.85475583896784101956	5.2077408144521903921	.00019841999999999998744
ENSDART00000097194	234.515	508.69	1407.92	2269.42	866.106	639.52	324.057	423.323	1298.44	1925.91	927.725	179.336	11	ct11-rigid	.92603170392028899549	7.7583850964373697323	.0000076938000000000007739
ENSDART00000097263	42.8908	69.6228	120.553	70.3299	3671.69	51.1873	98.0389	60.9637	38.8825	89.8832	7035.32	117.576	16	ct16-spike	.9440548966384250118	9.0523627043864394182	.0000019638000000000001544
ENSDART00000097270	566.536	533.926	765.103	390.471	632.773	481.091	417.315	574.668	866.375	342.645	385.284	420.197	7	ct07-spike	.85703196105257395399	5.2597832655844696248	.00018409000000000000775
ENSDART00000097312	446.3	506.09	652.17	356.891	402.918	263.716	397.76	441.583	780.925	703.549	205.759	130.616	8	ct08-rigid	.84723763551643804792	5.0435423215666101981	.00025199999999999999961
ENSDART00000097478	243.962	158.544	404.608	275.979	197.139	178.397	215.119	274.414	414.948	369.676	114.794	114.513	9	ct09-spike	.84877694959224003757	5.0762420324776398317	.00024021000000000000576
ENSDART00000097500	306.719	536.757	845.589	332.597	372.153	242.339	311.06	473.844	666.339	316.756	192.071	424.764	7	ct07-spike	.92286845049034704758	7.5779019970284098306	.000009434499999999999202
ENSDART00000097522	140.417	236.917	248.001	83.2441	156.097	101.797	179.451	132.988	323.391	149.099	64.5403	83.8563	7	ct07-spike	.83008504155588003215	4.707292068198220214	.00041615999999999999997
ENSDART00000097531	224.646	408.065	553.257	191.461	163.532	137.905	210.766	334.118	512.405	279.729	78.403	218.286	7	ct07-spike	.91921617018789103515	7.3823305856517302814	.000011816000000000000033
ENSDART00000097683	10.7178	39.9308	20.2808	50.54	20.1537	30.3062	22.8828	13.1742	26.416	51.6083	15.9374	27.4546	12	ct12-spike	.81357776586715802036	4.4246826331279196509	.00064236000000000002298
ENSDART00000097716	317.889	498.864	750.265	383.343	257.333	273.198	483.382	507.263	661.419	435.998	255.931	276.892	7	cos_per_23_ph_7	.91253405049523594883	7.0554543012322099571	.000017379000000000000811
ENSDART00000097845	484.604	573.909	588.342	450.156	300.105	278.196	478.483	418.237	412.795	654.008	284.697	189.516	6	ct06-box2	.84945692569117403625	5.0908331178975103626	.00023514000000000000179
ENSDART00000097868	154.724	118.187	299.458	193.58	151.799	178.018	207.111	182.666	286.419	161.845	114.739	67.9332	9	ct09-spike	.83011247915968500166	4.707792493858169891	.00041584000000000000304
ENSDART00000097874	258.718	228.367	313.445	288.572	892.848	457.854	292.54	206.104	342.33	218.626	824.695	217.063	16	ct16-spike	.95341122172842196481	9.9940785669997307394	.00000079910000000000000206
ENSDART00000097934	49.1948	42.8923	89.1155	71.348	24.4029	37.8127	58.5037	36.499	96.0454	68.6272	28.1666	31.374	9	ct09-spike	.89818366392464998871	6.4608149745072198655	.000036236999999999998812
ENSDART00000097937	789.081	1643.5	1537.75	568.36	579.745	339.641	852.586	1298.7	1731.71	597.624	115.614	530.8	6	cos_per_23_ph_6	.9249811280497539645	7.697228324620399853	.0000082410999999999997521
ENSDART00000098033	499.148	720.587	145.33	795.769	557.534	631.08	579.482	587.974	267.467	498.787	542.384	555.75	20	ct20-box2	.86025722358768896836	5.335524819602539992	.00016516999999999999239
ENSDART00000098078	1034.58	861.374	107.101	90.0009	3422.92	95.9063	1097.56	207.335	693.801	611.877	2400.18	105.005	16	ct16-spike	.90826769073376301122	6.8648816378657704362	.000021889999999999998787
ENSDART00000098081	1357.11	3519.09	3339.01	3713.41	1343.78	2222.74	2439.32	3754.5	3625.36	1863.41	1394.51	35.8548	8	cos_per_23_ph_8	.84253239346440800261	4.9463338828747795972	.00029084000000000000043
ENSDART00000098101	823.036	1075.06	1060.87	757.006	529.723	668.277	523.041	685.046	917.181	1008.12	868.986	466.793	6	cos_per_28_ph_6	.90030904607840900322	6.5411125232895201975	.000032730000000000000033
ENSDART00000098188	2076.36	869.888	1287.55	1128.18	395.383	678.66	2065.43	1572.27	1473.78	126.461	365.791	827.495	3	ct03-box1	.8107824286657060453	4.3801648964504300565	.00068851999999999997405
ENSDART00000098297	39.1788	61.6131	62.1581	41.5603	37.4891	30.7058	47.0008	42.169	51.6342	75.5299	55.8274	31.6801	7	cos_per_28_ph_7	.81474558777805494714	4.4435478628419300406	.00062379000000000004323
ENSDART00000098330	90.0096	95.9758	97.4576	75.925	47.5096	34.2834	81.9077	112.895	77.2162	115.195	44.3813	69.5982	6	ct06-box2	.83652195159918096845	4.8278031958199703055	.00034703000000000001641
ENSDART00000098368	941.165	1459.6	1670.77	1162.86	743.08	531.901	881.979	1221.71	1064.8	251.084	319.602	194.334	6	cos_per_23_ph_6	.82908241255530701341	4.6890805001345796654	.00042780999999999998499
ENSDART00000098373	549.519	592.744	669.446	375.982	295.95	272.249	354.145	540.133	529.402	279.021	162.213	108.598	5	ct05-box1	.90594771365043302858	6.7664825071019496505	.000024703000000000000484
ENSDART00000098381	507.987	528.338	229.466	235.845	231.667	321.482	430.441	326.343	488.454	106.692	116.141	365.72	1	cos_per_25_ph_1	.81401547106049698677	4.4317347224565697417	.00063535000000000002064
ENSDART00000098396	45.7502	51.6297	54.7704	56.7407	66.4207	81.528	54.1035	35.8799	38.1969	31.2687	44.9495	79.2263	19	ct19-spike	.82206879816367994795	4.5656195908112096049	.00051659000000000003961
ENSDART00000098408	6809.63	4313.8	5853.92	5416.92	7483.01	7461.3	7559.53	4106.1	5652.18	3105.42	7552.89	5942.76	20	ct20-box1	.82776140050861002351	4.6653064594013198274	.00044356000000000001546
ENSDART00000098415	164.285	80.7425	212.922	407.531	322.471	260.999	117.956	145.971	163.376	404.316	357.57	114.732	14	cos_per_23_ph_14	.91448257528687404427	7.1469775647549296238	.000015579999999999999909
ENSDART00000098419	264.806	557.895	199.487	332.54	192.816	174.528	275.085	385.341	247.111	98.7407	87.8179	257.961	3	ct03-spike	.81006094930908001395	4.3688181280894697878	.00070083999999999999162
ENSDART00000098430	45.5155	23.9086	37.4463	42.9431	1224.86	48.7313	194.824	47.7538	34.6098	26.7691	427.388	41.8704	16	ct16-spike	.86287464444283101805	5.3987971296609797989	.0001509699999999999996
ENSDART00000098431	96.0198	64.8249	59.4358	52.7883	1734.94	48.9447	340.232	81.5432	38.4143	46.2057	785.585	75.0537	16	ct16-spike	.90196991363211398429	6.6055736219279399535	.000030179000000000000232
ENSDART00000098433	967.298	1607.81	1043.6	953.627	360.146	1146.23	1086.09	1202.47	1198.69	475.2	487.589	312.673	4	ct04-rigid	.82166058178732903627	4.5586374027494001027	.00052216999999999996925
ENSDART00000098473	3097.2	1538.89	1085.68	818.019	210.536	2815.44	2337.16	1337.89	2063.36	734.547	494.024	4766.77	21	ct21-spike	.83777490738728499498	4.8520154415206295795	.00033468000000000001437
ENSDART00000098499	451.813	263.967	586.098	1485.2	1364.41	608.586	277.691	468.738	382.561	655.201	871.194	420.596	14	ct14-spike	.81738460631358300645	4.4867755018763899599	.00058335999999999999834
ENSDART00000098547	335.496	442.693	263.478	375.336	226.879	276.581	381.434	582.777	392.88	257.505	129.465	352.119	4	ct04-rigid	.82795201863263701014	4.6687216574584295969	.00044126000000000001377
ENSDART00000098562	1729.82	2653.48	3612.73	2376.85	1265.93	1780.86	2057.63	3394.27	3224.53	1860.56	1655.23	1656.16	7	cos_per_22_ph_7	.93781422383962997902	8.5430946125225091237	.0000032969999999999999429
ENSDART00000098604	388.992	391.672	338.101	331.445	1570.95	239.654	661.543	370.27	401.192	199.611	750.82	428.441	16	ct16-spike	.82722168651191696487	4.6556644926874399815	.00045011999999999997976
ENSDART00000098667	742.48	1069.62	325.588	699.722	541.299	452.887	833.044	991.785	419.478	297.841	569.788	330.887	3	ct03-spike	.87409696430233696507	5.6904352046616901717	.00010047000000000000537
ENSDART00000098795	259.414	113.971	507.62	271.195	222.726	232.024	247.294	366.898	472.46	302.113	183.405	252.113	9	ct09-spike	.85168870873423596635	5.1393689033733398475	.00021907999999999999631
ENSDART00000098847	7167.94	12811.3	1735.61	2062.25	180.569	932.303	6672.54	8961.1	733.839	229.771	73.3702	739.242	3	ct03-spike	.93961229419163705412	8.6819436188164900159	.0000028559000000000000496
ENSDART00000098863	1104.8	2369.37	2117.01	1776.83	1325.89	1223.74	1612.03	1717.71	1935.97	1176.73	1088.73	1016.95	7	cos_per_23_ph_7	.85825920733321903189	5.2883220604254201902	.00017670000000000001244
ENSDART00000098881	65.6544	65.0203	99.0899	53.167	1405.82	78.2373	176.95	236.561	191.826	522.313	1468.64	72.8285	16	ct16-spike	.96737753178371699292	12.07518336393910019	.00000013773000000000000312
ENSDART00000098896	75.0283	136.013	88.8814	34.2445	1908.54	48.7979	276.819	110.349	542.272	113.475	886.629	38.8174	16	ct16-spike	.88256588596814600223	5.9357405046094697809	.000071983999999999993846
ENSDART00000098917	28.2691	31.4312	43.5824	33.7821	75.2622	192.99	30.4919	38.4715	36.9204	57.4016	97.2785	92.2941	19	ct19-spike	.86562340034737295102	5.4670767944494498281	.00013709000000000000374
ENSDART00000098976	4822.12	3054.77	4934.28	3231.67	1765.67	3468.47	3959.81	4079.1	5001.32	3468.31	2318.01	4593.49	3	ct03-box2	.82199415086656901774	4.5643411945787404349	.00051761000000000005356
ENSDART00000099013	137.885	57.7638	12.4538	27.3905	435.911	21.9487	42.011	26.8126	34.2423	47.3158	193.134	57.6739	16	ct16-spike	.8636879890450640529	5.418801152762510398	.00014674999999999998918
ENSDART00000099015	355.718	137.635	36.2401	34.0473	854.76	22.1464	157.16	82.9794	68.3125	40.6356	555.615	139.447	16	ct16-spike	.90281172881191296131	6.6388423273393302182	.000028948000000000001345
ENSDART00000099040	1337.81	539.245	57.8758	741.932	140.415	1594.01	283.093	381.05	825.263	34.5599	76.3627	1758.19	21	ct21-spike	.83097120049935802033	4.7235102519126597187	.00040606000000000002552
ENSDART00000099078	237.018	99.4925	110.591	49.3753	614.595	221.837	195.535	50.8731	57.713	126.575	383.078	60.4784	16	ct16-spike	.87297301472325594673	5.6596172728212401637	.00010482999999999999751
ENSDART00000099235	513.546	656.09	893.466	568.177	629.474	574.92	465.978	511.032	1047.78	669.512	671.483	530.23	8	ct08-spike	.89802812809378496084	6.4550323317569500148	.000036504000000000001508
ENSDART00000099278	1044.03	1158.7	1207.78	1002.49	812.681	778.763	1230.97	1216.64	1099.47	421.956	372.42	574.562	4	ct04-sine	.83920389738274203673	4.8799435002437903108	.0003210099999999999911
ENSDART00000099283	1532.4	2404.04	2449.81	2536.4	1851.92	1956.79	2285.33	2613.13	2419.76	1190.55	1445.94	2015.92	8	cos_per_20_ph_8	.86515483061754494543	5.4553007195278802044	.00013938000000000001061
ENSDART00000099370	1712.27	1435.21	2872.93	2156.64	642.717	774.904	1083.31	2492.09	3786.18	4146.49	616.517	74.801	8	cos_per_25_ph_8	.84272707992271100874	4.9502765918177802362	.00028915000000000000814
ENSDART00000099389	128.694	136.166	288.741	154.386	127.099	115.629	101.114	182.109	200.253	176.942	46.131	69.3694	8	cos_per_23_ph_8	.83879386441758496673	4.87189520996975034	.00032487999999999999301
ENSDART00000099511	2674.31	2530	390.378	2195.15	1577.97	2558.37	2997.73	1772.92	453.102	206.527	700.311	2348.8	23	ct23-box1	.829648818279003053	4.6993506719783200154	.00042119999999999999237
ENSDART00000099523	811.964	906.252	1750.29	949.018	2390.42	2765.03	1080.73	1305.93	2072.38	1021.04	2500.95	1981.9	18	ct18-spike	.82437016939711604824	4.6053924602180096315	.00048602999999999997984
ENSDART00000099535	274.6	319.851	480.156	268.456	236.798	224.411	285.927	275.924	522.106	230.696	177.246	277.305	7	ct07-spike	.94106775599118996922	8.7988123653079295394	.0000025341999999999998093
ENSDART00000099537	8707.92	11115.6	11515.2	8143.35	4951.87	6309.04	6206.62	8815.32	9851.96	12108.2	5211.3	6833.11	6	cos_per_27_ph_6	.86389765449939803776	5.4239847420203304296	.00014568000000000000112
ENSDART00000099559	2074.68	2924.09	1249.49	925.788	910.049	1572.56	2640.39	2124.92	853.825	545.328	593.924	1198.07	2	ct02-rigid	.90568623214082200068	6.7556092232888200755	.000025037000000000001013
ENSDART00000099646	514.637	546.18	51.6424	317.284	248.107	358.639	587.605	474.086	91.526	125.279	197.788	164.349	2	ct02-spike	.87921699057931501642	5.8358575676126402954	.000082367999999999994714
ENSDART00000099701	1050.28	2083.23	1478.86	1111.31	677.957	747.09	1417.79	1748	1916.89	112.988	395.428	1038.6	6	cos_per_22_ph_6	.89783468752097095322	6.4478578779768902507	.000036839999999999999646
ENSDART00000099715	266.139	568.943	340.159	304.278	102.069	221.618	362.935	442.559	393.969	173.424	155.109	189.372	5	ct05-rigid	.91937524304266005082	7.3905821925295702712	.00001170299999999999959
ENSDART00000099721	519.166	422.322	463.107	340.335	9878.47	232.911	300.027	324.605	435.996	482.098	2565.64	159.102	16	ct16-spike	.82471108521310398931	4.6113443134430402992	.00048162999999999998131
ENSDART00000099754	292.162	304.753	362.595	290.72	170.577	274.597	317.096	288.144	324.362	241.869	157.283	204.883	5	ct05-box2	.86006441302604297316	5.3309290114790899295	.0001662599999999999972
ENSDART00000099761	62.4645	55.5854	68.9371	36.5673	10551.9	37.7755	111.513	93.9286	86.1434	139.703	3094.65	54.3167	16	ct16-spike	.85546844369919905482	5.2239121897675300232	.0001938400000000000008
ENSDART00000099763	156.571	250.447	382.231	222.678	108.849	198.045	223.31	295.132	334.168	186.319	124.847	164.785	7	cos_per_22_ph_7	.90555276353413904911	6.7500757024792301664	.000025208999999999998689
ENSDART00000099767	39.5689	36.3691	103.189	24.0177	11466.3	23.3944	56.3557	71.0874	77.8058	32.8828	5064.4	28.9693	16	ct16-spike	.91971643896310995014	7.4083602583521797058	.000011464000000000000692
ENSDART00000099794	354.366	407.514	717.432	339.351	336.983	324.076	321.552	386.662	563.795	502.866	311.859	209.789	9	ct09-spike	.8682707693118609793	5.5347013733080698827	.00012469000000000000049
ENSDART00000099821	95.4668	79.9183	48.4403	153.159	54.2715	301.911	135.605	122.85	104.175	19.4495	60.2428	371.648	20	ct20-spike	.92040349662964904276	7.4444912010750998732	.000010995000000000000609
ENSDART00000099832	369.338	337.169	599.205	395.431	347.547	328.74	340.05	449.205	640.856	433.507	220.286	248.578	9	ct09-spike	.88692226948830799049	6.0718357209511397699	.00006004100000000000333
ENSDART00000099856	49.8385	45.9096	63.5723	38.3869	117.542	41.0473	74.6016	22.8618	23.8317	33.0464	89.6779	53.3191	16	ct16-spike	.81912639056759295464	4.5157706693869901216	.00055780000000000000589
ENSDART00000099912	126.725	151.515	9.0117	147.232	3489.39	97.1511	520.191	122.725	72.0394	25.2597	2664.01	59.243	16	ct16-spike	.98218409930760497417	16.527874762925900853	.0000000068599000000000002684
ENSDART00000099916	21.4534	34.2141	18.7352	61.2517	22.6966	19.2736	22.5077	28.317	20.0347	55.5551	26.2529	39.5108	12	ct12-spike	.8968772790093809677	6.4126305962968102037	.000038534000000000000706
ENSDART00000099990	545.85	729.227	1030.43	525.08	603.18	506.552	482.304	658.945	849.425	355.738	352.343	575.053	7	ct07-spike	.89336175831396702485	6.287153584868629963	.000045288999999999999559
ENSDART00000100014	317.615	131.884	183.43	512.835	336.814	524.508	506.537	293.873	109.546	70.1149	222.535	452.364	20	cos_per_28_ph_20	.85098199398919804892	5.1238912062478698672	.0002240699999999999875
ENSDART00000100020	2281.48	2214.88	886.987	1699.45	1009.7	1804.2	4013.84	1960.17	653.769	686.599	1668.92	3230.08	0	cos_per_23_ph_0	.81315387291487495336	4.4178742875440697446	.00064919999999999995072
ENSDART00000100092	222.852	179.361	52.9757	143.578	1570.79	118.305	194.038	130.073	64.1812	85.2932	987.716	328.779	16	ct16-spike	.94926981821965494834	9.5459792138277705931	.0000012146999999999999913
ENSDART00000100110	242.366	215.647	202.175	242.194	597.355	394.119	225.011	200.665	189.307	425.922	443.211	424.81	17	cos_per_23_ph_17	.8850665772489150207	6.0129753570448896127	.000064921999999999999457
ENSDART00000100126	403.809	716.478	1393.97	907.377	843.118	629.399	390.756	710.293	1267.38	1047.8	866.926	362.115	10	ct10-rigid	.90954081076582704579	6.9204027927556497346	.000020457999999999999623
ENSDART00000100170	16188.9	11431.4	3335.54	8659.02	9293.8	19401.3	14429.3	2608.66	5353.02	1317.38	5950.88	18801.3	22	ct22-spike	.87314039703018897498	5.6641825654861497341	.00010417000000000000044
ENSDART00000100191	96.0664	179.305	57.1627	91.7634	96.5175	78.0054	142.363	174.972	127.25	27.1831	49.1825	71.1063	3	ct03-spike	.82839141841639696295	4.6766137612348304131	.00043600000000000002686
ENSDART00000100274	349.807	437.521	888.073	519.921	420.073	399.838	499.154	621.952	882.891	976.965	251.272	454.07	10	ct10-spike	.81351880767427398045	4.4237344310186301755	.00064331000000000001897
ENSDART00000100277	514.549	482.924	62.5882	386.973	179.062	171.961	422.647	499.7	60.1798	81.488	129.502	178.763	2	ct02-spike	.87717986046448404025	5.7769806869985202979	.000089234000000000006565
ENSDART00000100289	536.764	447.426	950.401	724.525	393.295	493.879	377.242	556.261	898.27	629.286	226.976	460.773	9	ct09-spike	.90133572830613395421	6.5807777642893903192	.000031133999999999997018
ENSDART00000100372	210.527	262.553	453.219	326.29	303.238	198.366	368.719	382.442	476.988	143.766	110.218	244.681	9	cos_per_20_ph_9	.84358569166027197461	4.9677450720160996056	.00028176999999999998055
ENSDART00000100374	88.6117	133.345	342.643	124.523	81.943	82.6167	55.7449	176.14	184.911	254.114	169.241	49.0511	8	cos_per_26_ph_8	.8299994899996190334	4.7057324264550297599	.00041713999999999998042
ENSDART00000100379	395.143	327.951	365.833	500.461	452.955	338.809	358.719	410.363	467.697	384.158	394.319	342.51	13	cos_per_20_ph_13	.85091772110871100043	5.122488595373900111	.00022452999999999999326
ENSDART00000100412	921.676	1021.43	711.737	573.648	668.366	632.061	1242.88	795.45	481.619	325.119	239.739	596.727	2	ct02-rigid	.81690827506189900298	4.4789110317632596647	.00059049999999999998757
ENSDART00000100442	30.1476	45.8022	45.5413	23.1952	18.8864	37.3847	52.8288	21.9043	25.8244	24.6313	46.5056	48.9233	4	cos_per_20_ph_4	.8320040323684320116	4.7425595161969198443	.00039452999999999997837
ENSDART00000100468	921.53	878.611	57.3083	83.2864	50.6175	262.016	580.079	497.712	138.851	199.751	90.8667	181.866	2	ct02-spike	.91635669559040999754	7.2378702328070501082	.000013991000000000000384
ENSDART00000100473	2277.3	3659.26	3927.06	2344.38	1655.26	1373.32	3095.88	3071.84	3299.12	803.339	855.274	1553.49	6	cos_per_22_ph_6	.91684857542530695529	7.2622110216765101143	.000013595999999999999931
ENSDART00000100479	184.547	170.862	75.7638	91.4284	457.705	180.194	316.433	215.885	145.542	57.3266	448.13	49.9537	16	ct16-spike	.84415584316392999753	4.9794177105583399268	.00027694999999999998265
ENSDART00000100605	143.411	135.841	270.389	158.331	160.54	177.544	125.499	204.413	328.333	235.407	107.925	184.509	9	ct09-spike	.8569104176042190435	5.2569753208308700465	.00018483000000000000406
ENSDART00000100658	1778.68	2226.07	347.494	1108.23	334.234	658.269	1533.83	907.722	246.089	230.464	218.777	414.699	2	ct02-spike	.83698951223576600889	4.8368086252169302242	.0003423799999999999847
ENSDART00000100659	201.472	193.075	324.828	343.259	216.295	254.308	210.038	374.465	400.286	205.182	173.329	184.606	11	cos_per_20_ph_11	.86073393086304594846	5.3469254161795696234	.00016250999999999998736
ENSDART00000100665	458.156	1432.85	556.38	368.242	259.099	496.575	642.518	1072.43	893.426	213.988	286.447	365.219	5	ct05-spike	.90773712358362401709	6.8420672187488795757	.000022509999999999999627
ENSDART00000100725	12646.7	9029.58	13196.3	13725.5	5812.37	12908.4	12453.7	14270.8	13132.7	13396.3	8320.92	13187	4	ct04-box2	.84828112398837995922	5.0656593415151300874	.00024395999999999998849
ENSDART00000100726	19.7191	17.1515	29.5265	33.2589	50.9824	17.6599	20.8531	13.512	11.6358	30.1409	37.5996	19.804	15	ct15-spike	.87812232555176195081	5.8040480855373504099	.000086003999999999998526
ENSDART00000100730	206.61	219.843	355.861	226.77	295.67	166.954	198.947	227.761	369.395	195.878	176.603	108.926	8	ct08-spike	.81861353453831797733	4.5071942154735999964	.00056523999999999994821
ENSDART00000100778	266.495	236.057	438.889	385.146	196.66	210.134	261.497	508.238	420.032	163.861	113.278	167.82	9	cos_per_21_ph_9	.8719709404504679684	5.6324608631971297967	.00010882999999999999987
ENSDART00000100779	142.623	142.732	246.018	555.962	444.113	393.487	97.1765	115.912	146.607	667.675	285.941	180.116	13	ct13-spike	.88388313424786801864	5.9761324687141597067	.000068193000000000002529
ENSDART00000100790	80.3981	97.2102	77.8946	63.6561	211.208	123.951	119.666	111.285	126.737	98.7435	168.227	105.399	17	ct17-spike	.86023004693958704525	5.3348765080521696191	.00016532999999999999086
ENSDART00000100853	49.9515	90.3264	197.601	80.0683	54.7568	68.4528	88.2644	45.02	131.084	109.022	35.6101	62.9607	9	ct09-spike	.87226303670221194686	5.6403459694941897595	.000107650000000000001
ENSDART00000100892	587.136	659.797	983.353	508.695	572.814	444.506	554.303	606.986	878.082	704.977	412.739	448.164	7	ct07-spike	.88283859047366497474	5.9440502096393998954	.000071186000000000005891
ENSDART00000100897	594.966	6221.84	5585.14	3546.63	1072.96	4645.85	4233.23	7989.45	8952.3	5232.71	1103.94	680.535	7	ct07-box1	.81879024228230101734	4.5101455840050199697	.0005626700000000000321
ENSDART00000100931	336.569	644.003	738.104	501.089	391.078	386.945	491.369	578.311	565.534	409.274	245.694	225.039	7	cos_per_23_ph_7	.90280242620567696665	6.6384724476023500017	.000028960999999999999358
ENSDART00000100936	458.85	877.918	1220.07	429.196	382.303	341.628	338.614	954.019	1120.53	629.778	274.329	708.381	6	ct06-spike	.89693574115858898388	6.4147683567788496006	.000038429000000000000865
ENSDART00000100937	2384.41	2611.96	3444.58	2636.5	2729.93	1977.27	3073.65	2854.87	3585.62	2477.7	1823.85	1565.31	7	ct07-rigid	.82636231388821002053	4.6403959552381897069	.00046072000000000002057
ENSDART00000100948	613.508	309.209	241.578	310.337	126.478	211.815	570.071	124.605	225.495	172.859	260.62	128.224	0	ct00-spike	.9149632039436730313	7.170013407153749796	.000015160000000000000542
ENSDART00000101044	41.7631	71.4036	61.4187	91.221	70.4769	138.107	43.4202	78.3816	110.097	91.1249	101.681	233.652	20	ct20-spike	.82604737763298097253	4.6348261228347800156	.00046464999999999999141
ENSDART00000101053	906.779	489.267	142.364	279.717	137.887	630.881	664.121	252.864	153.851	84.2064	290.019	235.59	23	ct23-spike	.8328165363341279992	4.7576575987498603837	.00038562999999999997888
ENSDART00000101070	661.587	838.168	622.962	599.896	546.183	577.486	865.968	670.449	638.112	366.468	356.113	494.672	3	ct03-sine	.81825650852099895971	4.5012430052095195876	.00057045999999999995583
ENSDART00000101171	528.25	224.635	126.116	371.365	386.476	500.42	602.45	491.292	383.272	54.78	230.292	132.67	23	cos_per_28_ph_23	.8136836542241230319	4.4263866088844299185	.00064066000000000003587
ENSDART00000101201	176.255	175.364	248.821	176.551	112.678	93.4769	127.18	158.32	238.972	266.907	75.5797	111.278	7	cos_per_26_ph_7	.84794035286756697101	5.0584136389723202143	.00024655999999999999748
ENSDART00000101203	719.062	881.843	1424.37	930.448	630.616	591.156	729.376	591.255	1173.73	1644.7	464.947	844.988	10	ct10-spike	.83801064321026896842	4.8565994129439102878	.0003323900000000000075
ENSDART00000101216	98.3443	123.986	217.519	143.061	134.033	89.9768	117.225	162.773	234.185	209.694	63.3845	114.444	10	cos_per_22_ph_10	.85398396810403898183	5.1903477892901701551	.00020347000000000000177
ENSDART00000101276	105.017	49.932	42.997	80.8547	119.777	181.747	112.981	107.72	29.6268	23.388	115.461	98.8004	21	cos_per_27_ph_21	.88357386985535901758	5.9665914883646200551	.000069068999999999998885
ENSDART00000101349	25.0665	33.4351	17.1477	89.3068	599.028	62.0506	15.0334	56.1579	19.1906	165.306	187.249	39.9269	15	ct15-spike	.83316655514576898334	4.7641925639080495714	.00038184999999999998457
ENSDART00000101401	56.2138	72.9946	114.689	119.065	104.501	55.8619	78.1135	127.308	148.201	126.352	70.6102	76.3658	11	cos_per_21_ph_11	.9435464955946669674	9.0078342321708291252	.0000020528999999999998604
ENSDART00000101408	29.2579	23.1949	83.7456	48.0197	40.244	28.5883	25.6532	31.5267	79.7894	53.6708	24.92	59.3019	9	ct09-spike	.89091566719618897618	6.2032506016520203573	.000050512000000000000205
ENSDART00000101431	190.319	152.246	81.9689	184.358	220.782	163.77	176.529	165.242	56.6621	163.214	142.371	226.647	19	ct19-box2	.87119759676911301405	5.6117053542218400253	.00011201000000000000669
ENSDART00000101472	9631.65	9839.65	9851.76	7177.3	3012.17	4278.22	7686.19	14747.7	7856.76	3339.56	1688.75	8362.06	6	cos_per_22_ph_6	.89369470594129396535	6.2987845879368400404	.000044611999999999999095
ENSDART00000101513	1243.19	1283.1	468.546	689.134	471.619	620.312	958.273	722.018	302.213	172.782	284.568	433.525	2	ct02-spike	.84336720463770298295	4.9632874849545496332	.00028362999999999999323
ENSDART00000101533	754.334	668.115	1360.39	975.217	700.418	604.892	746.476	744.021	1653.68	793.676	502.985	575.774	9	ct09-spike	.94930801872246395323	9.5498660880420498387	.0000012102000000000000767
ENSDART00000101577	596.463	323.916	417.479	319.469	220.255	317.598	754.643	343.091	401.247	76.9741	107.087	165.846	1	ct01-spike	.81888722813095005115	4.5117670919446997146	.00056125999999999994904
ENSDART00000101586	495.041	552.303	931.854	475.697	509.361	549.94	615.787	610.022	1043.22	874.128	578.874	536.152	9	ct09-spike	.86566032355922495345	5.4680071760106203627	.00013690999999999998852
ENSDART00000101594	64.5047	34.1057	31.3979	47.1693	116.177	107.022	75.8826	40.3145	38.9479	23.8029	50.5332	45.3995	20	cos_per_28_ph_20	.81803086518047596343	4.497489925944299749	.00057377000000000003086
ENSDART00000101659	1278.32	1865.01	2220.85	1677.9	1546.93	1245.26	1766.03	2240.55	1662.2	932.67	867.107	1890.74	8	cos_per_20_ph_8	.91501272215066598026	7.1723973466367896279	.000015116999999999999429
ENSDART00000101710	107.891	87.0521	42.0423	68.9126	242.281	42.3907	63.758	52.3625	39.0734	46.1458	168.031	48.2734	16	ct16-spike	.90975974781539603597	6.9300632716322798643	.000020219000000000000725
ENSDART00000101711	175.824	102.284	68.8311	36.4317	370.468	56.8263	116.546	74.7808	66.474	217.192	262.141	111.79	16	ct16-spike	.83003504636428404595	4.7063805045846702768	.00041672999999999997588
ENSDART00000101785	45.5452	49.7476	84.4338	78.1064	33.1786	25.0199	27.5259	55.4353	58.374	85.9404	56.0616	49.2421	9	cos_per_26_ph_9	.88312228192688502215	5.9527236260735501006	.000070363000000000003775
ENSDART00000101881	93.4574	152.618	114.269	184.049	149.007	205.919	49.6525	87.4367	98.2763	175.692	249.9	247.495	16	ct16-box1	.83351204301264203433	4.770661293311039941	.00037815000000000000306
ENSDART00000101920	1072.05	1063.29	231.861	857.556	844.614	872.528	1082.31	1221.25	499.731	594.545	810.621	1107.54	21	ct21-box2	.86661990935945798498	5.4923121398865903942	.00013231000000000001223
ENSDART00000101940	2023.81	2125.05	2107.4	1447.35	1136.07	1005.64	1056.85	1401.7	2063.59	1622.03	693.296	936.646	5	cos_per_26_ph_5	.85677240896959494521	5.2537909913845703969	.00018567999999999999761
ENSDART00000101943	1197.8	1507.59	2460.25	2065.18	1631.35	1317.36	1862.9	2350.43	2158.51	1192.08	1291.33	1342.82	9	cos_per_20_ph_9	.91404725441995704482	7.1262728043247998144	.000015968999999999999065
ENSDART00000101977	2128.77	571.557	538.393	628.769	221.261	803.908	1275.76	573.801	285.138	114.066	141.762	571.624	23	ct23-spike	.88724853603169395733	6.082325361401260011	.00005921399999999999922
ENSDART00000102091	241.125	69.5627	82.7551	83.1053	126.044	89.2985	178.907	115.616	134.889	55.206	101.442	22.9911	0	ct00-spike	.8183574362044140349	4.502923751358520299	.00056897999999999996322
ENSDART00000102127	1410	1846.72	2228.24	1117.52	912.518	679.8	1600.26	1590.69	2536.74	2266.71	651.635	884.981	6	cos_per_25_ph_6	.87224867044252696324	5.6399575648585997811	.00010770999999999999704
ENSDART00000102202	2032.54	3725.54	3275.09	2622.61	1723.18	1704.82	1941.49	2343.05	2749.02	1042.73	1013.81	1439.11	6	cos_per_23_ph_6	.81494246773097200887	4.4467440780802895972	.0006206999999999999627
ENSDART00000102213	1040.31	926.636	1451.34	692.616	729.488	546.856	614.308	1095.19	1439.67	999.375	441.332	973.137	7	ct07-spike	.82448743779867594839	4.6074380132790899722	.00048451000000000000794
ENSDART00000102268	208.89	375.357	276.612	208.745	125.286	152.412	246.51	206.121	228.09	106.414	118.347	184.512	5	cos_per_22_ph_5	.83951769108995899504	4.8861217683915398879	.00031806000000000000071
ENSDART00000102274	84.7806	103.545	126.055	78.1991	67.9886	43.302	94.2005	82.1566	93.5236	90.8225	48.3145	54.3252	7	ct07-rigid	.85643137335142704991	5.2459403204929699882	.00018778999999999998927
ENSDART00000102293	383.244	623.731	926.37	353.111	209.483	248.42	326.215	448.381	689.451	837.839	140.553	307.474	7	cos_per_25_ph_7	.8285788443545309967	4.6799884983957102946	.00043376999999999998892
ENSDART00000102386	32.1588	87.0323	59.6622	45.3495	297.054	41.0464	52.2615	52.0283	54.7704	43.2174	183.953	54.9689	16	ct16-spike	.93614380269712804683	8.4192273115030005215	.000003753599999999999942
ENSDART00000102430	1657.12	1233.06	1563.34	1048.65	837.944	719.124	1377.47	1462.81	1041.88	1061.98	546.246	593.03	6	ct06-box2	.83234601192888502119	4.7489020832595301158	.00039075999999999997889
ENSDART00000102481	19.094	38.5695	15.7005	86.34	32.133	24.1105	32.2212	29.2456	19.4889	50.3248	18.5641	14.3664	12	ct12-spike	.8482754617994630042	5.0655387652769903184	.00024399999999999999489
ENSDART00000102482	278.356	240.276	535.03	286.196	253.17	178.527	212.429	256.467	432.573	540.542	132.918	153.784	10	ct10-spike	.83888499102089997272	4.8736814560551096065	.00032402000000000000463
ENSDART00000102486	55.5195	34.5161	29.5677	28.3793	248.226	100.24	41.4003	17.8053	34.9828	60.3846	140.484	81.442	17	ct17-spike	.91867079644682003714	7.3542166294187802933	.000012208000000000000684
ENSDART00000102522	859.298	1072.07	971.193	688.771	597.634	761.276	726.886	850.45	898.956	554.231	470.65	668.712	5	cos_per_23_ph_5	.87036641065226505454	5.5895906268270296735	.00011550000000000000208
ENSDART00000102535	256.607	525.667	458.137	156.219	166.556	185.605	236.765	269.213	442.532	177.984	150.197	134.129	6	ct06-spike	.87234758164620296306	5.6426329549547595832	.00010731000000000000087
ENSDART00000102571	489.151	417.767	1010.87	654.356	506.393	615.537	557.355	830.899	1052.74	775.178	567.378	775.984	9	ct09-spike	.81844342487933297026	4.5043567136430500142	.00056771999999999996512
ENSDART00000102578	73.7565	44.2139	63.6265	36.3075	139.477	90.2761	72.8482	99.3865	97.7386	107.509	185.807	72.6095	16	ct16-spike	.82144287166570295611	4.5549224959463199269	.00052515999999999999313
ENSDART00000102629	475.661	649.316	905.031	488.284	376.185	385.941	423.907	490.88	620.373	297.606	368.482	300.628	7	ct07-spike	.84636685189465099555	5.0252443459787201618	.00025887000000000002023
ENSDART00000102674	31.5017	30.3617	21.2187	39.0446	35.1851	59.3672	21.2639	28.3438	37.3187	21.989	20.3807	58.4307	20	ct20-spike	.87642769653872298896	5.7555867626332197773	.000091879000000000005804
ENSDART00000102703	45.9609	49.7033	35.0066	78.2154	48.0783	46.726	33.3395	36.5303	39.139	81.1186	35.2002	40.3709	12	ct12-spike	.9381107796043539615	8.5655907726609896713	.0000032208000000000001473
ENSDART00000102720	78.3162	149.634	63.3932	96.1242	72.1742	65.5301	61.8102	134.301	50.5976	36.072	55.5191	29.4159	4	ct04-spike	.86875155178448404403	5.5471859142851496216	.00012253000000000000762
ENSDART00000102855	1602.53	1731.18	1969.43	1070.49	1061.8	1120.76	1561.98	1524.03	1484.82	389.806	857.639	1270.13	5	cos_per_22_ph_5	.84808746890482700209	5.0615389731547200114	.0002454399999999999811
ENSDART00000102891	281.122	449.675	162.669	227.765	160.525	250.481	364.407	293.169	135.275	28.5531	110.953	130.202	2	ct02-spike	.81649105007337297035	4.4720450756356502353	.00059681999999999996772
ENSDART00000102913	1372.98	1870.53	2868	1959.81	1616.59	1760.48	1964.41	2684.82	2847.8	839.773	1579.02	1586.9	7	ct07-spike	.81954069228125303592	4.5227230295223304068	.00055184999999999999679
ENSDART00000102920	379.604	204.751	79.3031	478.651	536.461	761.253	361.603	424.859	118.268	92.9123	545.819	564.682	19	cos_per_27_ph_19	.88017600615574598244	5.8640596163407403552	.000079282000000000004271
ENSDART00000102923	44.5898	39.5837	56.9286	15.4261	123.236	270.298	32.6844	19.0381	15.9003	38.9652	140.653	144.658	19	ct19-spike	.9003398248829630468	6.5422931893216897947	.00003268100000000000101
ENSDART00000102981	46.6791	26.1484	70.72	94.5467	49.369	29.8447	45.6497	61.5251	59.3272	51.7985	25.8226	40.5735	11	cos_per_20_ph_11	.85317712004064194531	5.1723019010868398482	.00020885000000000000786
ENSDART00000103010	272.045	302.46	247.073	205.569	175.06	249.412	285.347	328.372	255.889	312.979	93.4499	197.751	5	ct05-box2	.82283409912758498361	4.5787680158593602187	.00050626999999999996224
ENSDART00000103045	71.1303	49.1878	42.9214	48.9728	47.671	123.005	110.126	93.185	81.1675	72.6211	85.7764	185.968	21	ct21-spike	.83400095822429898273	4.7798468307122199406	.00037294999999999998508
ENSDART00000103070	414.792	691.588	271.8	432.541	276.597	334.361	435.573	560.993	190.098	156.169	163.423	260.687	3	ct03-spike	.86966934360711101171	5.5711963688279402263	.00011849999999999999368
ENSDART00000103077	248.84	198.987	374.827	794.199	685.303	799.438	328.101	406.852	286.643	279.132	830.721	656.174	16	cos_per_28_ph_16	.87717687927414500493	5.7768955302427897891	.000089244000000000001387
ENSDART00000103100	485.831	643.049	678.271	633.381	388.771	504.571	550.737	591.752	660.984	352.388	439.38	349.521	7	cos_per_22_ph_7	.8106031084473399595	4.3773392920639899728	.00069156999999999996687
ENSDART00000103146	26.4138	29.5709	31.5102	64.4751	114.956	46.1808	34.179	21.7921	37.9301	47.2087	75.0516	26.8245	15	ct15-spike	.91000048346530304499	6.9407243409477903384	.000019958999999999999826
ENSDART00000103149	40.1411	14.6481	85.4302	50.0923	121.302	66.307	29.1181	26.7898	101.13	129.545	87.2255	107.81	14	ct14-box2	.82616582834108998057	4.6369193861477500107	.00046316999999999999881
ENSDART00000103150	609.463	749.269	760.919	697.749	589.31	578.192	846.888	990.152	758.361	122.82	337.303	819.378	6	cos_per_21_ph_6	.8177536733196359986	4.4928880402640896108	.00057786999999999996789
ENSDART00000103160	316.46	361.766	510.639	261.426	376.725	202.762	263.928	386.611	478.994	255.429	312.591	184.886	7	ct07-spike	.86002835233128505088	5.3300704483361398545	.00016646000000000000206
ENSDART00000103162	79.6984	63.3978	292.07	41.5647	82.7504	79.545	117.47	69.4156	155.908	140.702	48.557	60.6623	8	ct08-spike	.81727959419706697197	4.4850393223446500812	.00058492999999999999855
ENSDART00000103207	12.9889	17.5261	21.3667	41.1309	22.8505	16.9435	19.416	16.166	14.8643	60.7807	21.4357	18.0423	12	ct12-spike	.92975071632215999795	7.9853685710623896199	.0000059826000000000001153
ENSDART00000103231	1106.56	972.577	1471.97	1246.97	395.131	543.042	916.195	1336.78	1428.75	590.387	245.282	1081.25	8	cos_per_21_ph_8	.857071088716234053	5.2606879116536102714	.0001838499999999999965
ENSDART00000103264	5884.16	6134.53	864.15	4466.96	1145.68	5548.12	6638.28	4771.24	797.24	361.836	1229.99	4396.77	0	ct00-box1	.87874773518338400446	5.8221723041726196612	.000083912000000000005681
ENSDART00000103294	217.2	333.563	107.824	264.806	145.061	276.043	361.421	320.445	145.938	105.165	115.831	277.83	0	ct00-box1	.82690867527523104208	4.650091282788960001	.0004539599999999999972
ENSDART00000103301	51.5305	30.8678	13.1745	21.3635	32.9675	47.4516	28.6206	25.1394	25.318	28.3215	33.0987	26.0568	19	cos_per_20_ph_19	.82082715001169603841	4.5444491869176504295	.00053368999999999996737
ENSDART00000103320	330.763	573.686	487.551	352.373	363.413	264.002	346.252	578.66	600.802	121.71	208.683	227.198	6	ct06-spike	.88427704300742204779	5.9883366954282504224	.000067089999999999996318
ENSDART00000103330	4526.22	1767.24	1953.54	1278.46	559.257	2805.42	2893.78	2385.64	1850.24	135.254	553.399	1421.61	0	cos_per_25_ph_0	.84106792237300798121	4.9168887692515799159	.00030382999999999999634
ENSDART00000103365	1629.09	1483.5	1207.99	1025.06	1050.86	935.42	1207.19	1631.55	1427.77	231.654	503.294	1006.99	3	ct03-box1	.82350394523423398052	4.5903397376781196471	.00049737000000000001695
ENSDART00000103405	612.956	873.94	175.646	289.683	46.7505	136.959	659.494	690.347	137.786	42.1712	53.6037	97.4302	2	ct02-spike	.95524941349672498614	10.212129930960900381	.00000065545999999999996786
ENSDART00000103457	237.901	47.0992	94.3864	36.7414	983.428	60.6531	48.0175	51.5357	70.0991	188.243	965.186	128.708	16	ct16-spike	.98404970409349901139	17.492681508925798539	.000000003958100000000000218
ENSDART00000103463	718.884	676.856	1025.62	714.468	549.478	667.054	750.64	552.945	1010.8	937.952	526.925	570.344	9	ct09-spike	.86841685376939303787	5.5384880390934698724	.00012402999999999998987
ENSDART00000103507	37.9285	32.1043	21.1265	22.7703	14.2131	48.9936	61.1051	25.1394	22.3976	33.005	17.301	42.8459	22	ct22-spike	.85016541293382896782	5.1061329215434003714	.00022995000000000000574
ENSDART00000103524	275.931	321.825	447.659	244.145	195.119	212.991	221.441	343.177	689.736	207.802	148.339	49.2104	7	ct07-spike	.88562401871981499824	6.0305152367184495787	.000063423999999999994487
ENSDART00000103592	122.639	39.5079	26.1408	30.6144	387.685	113.137	54.2387	36.0751	27.4441	118.026	231.01	20.6166	16	ct16-spike	.88808483585067099497	6.1094094785832195882	.000057132999999999996613
ENSDART00000103630	52.5281	83.6279	148.965	82.9143	87.2987	58.5549	36.5219	61.4859	121.9	127.611	92.3029	60.6497	9	cos_per_26_ph_9	.89366014914123703683	6.2975750031677604213	.000044681999999999996731
ENSDART00000103639	15.7039	21.9788	26.8445	13.2557	42.2549	69.9371	39.994	21.1037	17.6252	47.4024	44.6336	64.4349	19	ct19-spike	.85438425554034203024	5.1993517972696396967	.00020084000000000000832
ENSDART00000103700	43.531	53.4985	54.5652	37.4203	1083.32	64.6918	96.0862	147.013	115.801	368.514	951.532	51.358	16	ct16-spike	.96654298274463201768	11.915872300801700234	.0000001560600000000000091
ENSDART00000103704	2076.21	2190.57	1854.63	1980.59	814.366	1935.94	2914.59	2529.9	2095.8	695.534	1227.77	2577.97	5	cos_per_21_ph_5	.84908247777769396691	5.082786922475190039	.00023791999999999999889
ENSDART00000103808	487	758.054	505.689	673.371	200.986	354.142	580.886	1197.64	508.149	111.553	192.903	299.364	6	cos_per_22_ph_6	.81161073487630297496	4.3932636180144397642	.00067458999999999997698
ENSDART00000103851	666.332	489.586	197.737	485.102	1141.98	1101.06	989.764	504.025	175.777	96.2312	919.691	738.424	20	cos_per_26_ph_20	.89557923265044003802	6.3656037819013802093	.000040929000000000000646
ENSDART00000103878	353.408	451.182	684.116	425.986	175.59	186.435	245.293	290.751	542.471	827.752	165.413	144.832	7	cos_per_26_ph_7	.83767285881327302466	4.8500338932099200662	.00033566999999999998965
ENSDART00000103898	522.279	614.322	53.6178	412.412	401.909	256.67	532.913	490.965	101.215	72.4383	137.486	237.514	2	ct02-spike	.81330589446251699837	4.4203135852284196616	.00064674000000000003187
ENSDART00000103928	306.877	386	517.154	354.701	276.197	296.029	313.084	257.101	512.964	428.892	189.828	330.065	9	ct09-spike	.86888457511203398553	5.550651417292920442	.00012194000000000000141
ENSDART00000103934	788.683	743.79	351.568	353.583	395.187	347.869	1056.35	397.35	472.508	77.9813	224.873	317.911	1	ct01-spike	.86805916787000603208	5.5292268071678201125	.00012563999999999999647
ENSDART00000103948	295.979	279.732	642.263	959.402	1329.35	1404.41	257.15	221.782	342.825	259.174	1871.65	356.858	17	ct17-spike	.81688920898470096521	4.4785968157823496938	.00059079000000000000004
ENSDART00000103958	103.82	114.673	49.1326	224.924	69.2286	246.239	66.7111	89.6198	52.891	62.9014	110.552	549.9	20	ct20-spike	.82869155071077005292	4.6820202723395798472	.00043242999999999997803
ENSDART00000104003	2390.51	3051.82	2262.5	840.847	778.708	1314.05	1972.8	2419.93	2078.37	538.988	1287.62	1072.94	3	ct03-box1	.92861518731543901684	7.9142557215066098308	.0000064694000000000002657
ENSDART00000104020	18.557	19.243	27.5442	11.4764	20.9349	37.762	11.7171	17.1628	18.4651	23.9901	23.7421	51.7022	20	ct20-spike	.87387576938937905346	5.6843398442824604189	.00010131000000000000411
ENSDART00000104037	596.775	523.922	658.223	456.669	342.598	469.275	497.343	745.514	635.497	261.971	293.793	300.455	4	ct04-sine	.85323585425459302911	5.1736109176984701463	.00020845999999999999296
ENSDART00000104059	6322.1	7408.9	9203.02	6045.58	7010.48	6121.66	5949.42	7132.06	9474.43	8387.75	5040.6	3033.81	8	ct08-rigid	.84386659526005003418	4.9734886614468303279	.00027939000000000002027
ENSDART00000104112	473.752	920.566	934.057	474.883	458.315	596.814	704.762	673.256	869.257	653.95	432.111	346.419	6	ct06-sine	.83263007481915596308	4.7541839110259802581	.00038766000000000001196
ENSDART00000104207	2199.81	1956.63	2122.81	1410.26	599.518	571.517	1537.12	2141.92	1588.49	383.001	551.59	245.688	5	ct05-box1	.90446825110310002938	6.7055220351964104353	.000026639000000000000244
ENSDART00000104248	1178.53	863.792	1230.63	907.138	759.409	621.7	1052.88	1247.75	1252.64	468.697	761.352	764.889	4	ct04-box1	.83678673376744594492	4.8328986905946695884	.00034438999999999997392
ENSDART00000104257	8768.67	5115.82	2560.15	2950.28	1275.37	6094.31	7475.2	2658.32	3685.86	398.268	1952.56	4963.9	23	ct23-spike	.86303067205450101351	5.402621790149109593	.00015014999999999999051
ENSDART00000104272	330.188	83.2231	27.6983	164.039	226.203	372.438	176.588	144.414	55.6975	47.4055	187.274	285.043	21	cos_per_25_ph_21	.89516236121926895386	6.3506764396990202926	.000041723000000000000159
ENSDART00000104298	2913.12	2841.31	3857.26	1460.81	1605.15	1338.59	1823.68	2836.81	3475.39	2677.64	869.453	399.31	5	cos_per_26_ph_5	.90406603534765594965	6.6891811015025304243	.000027186000000000000258
ENSDART00000104334	464.04	660.114	898.234	621.216	371.481	408.888	409.563	504.297	764.823	535.816	362.394	394.57	8	cos_per_23_ph_8	.87842013574545696475	5.8126622394746298994	.000085002999999999999132
ENSDART00000104336	182.164	80.8864	24.1977	23.7251	581.732	29.9809	69.8086	29.0218	43.119	34.9248	217.567	24.9411	16	ct16-spike	.83251257813282497633	4.7519977126697403591	.0003889399999999999997
ENSDART00000104360	12855.7	13838	14530.6	11186.1	8463.88	9604.98	12777.2	16230.3	15181.7	14085.4	11084.9	9853.25	5	cos_per_26_ph_5	.93083252544488304103	8.0546799327723501705	.0000055462000000000003633
ENSDART00000104397	1697.22	3035.2	2680.27	1466.11	1422.62	1272.05	1888.93	2015.68	2412.34	794.391	823.733	1463.67	6	cos_per_22_ph_6	.86617532659809304274	5.4810213129559404166	.00013442999999999999871
ENSDART00000104425	985.376	872.979	1804.63	1607.42	601.803	909.441	1285.84	1728.69	1244.13	727.825	399.483	1661.1	8	cos_per_20_ph_8	.86200226774752797265	5.3775236712030300978	.00015558999999999999263
ENSDART00000104499	6111.76	6369	8755.19	6805.15	4276.24	4310.54	4939.17	5764.87	7456.13	6190.83	4633.02	4885.93	8	ct08-rigid	.87341871725570097151	5.6717923289250800067	.00010307999999999999563
ENSDART00000104520	3718.2	6022.57	6817.04	4356.55	3929.34	3396.56	4621.15	4747.65	5388.86	3229.45	2453.72	5357.48	7	cos_per_21_ph_7	.85258661265304402921	5.1591812488532902137	.00021287000000000001342
ENSDART00000104527	333.629	475.599	227.947	306.088	242.704	190.433	295.904	462.666	118.411	273.95	129.754	254.376	3	ct03-spike	.87326627307938198275	5.6676213426629695746	.00010367000000000000184
ENSDART00000104564	129.574	118.681	76.2185	76.0742	113.412	101.204	135.338	111.782	85.8669	49.531	51.8753	97.6732	0	cos_per_25_ph_0	.85144160328089402157	5.1339455211716096272	.00022081999999999998982
ENSDART00000104610	32.784	49.7695	90.1104	77.7403	46.289	37.5544	52.6357	46.9408	67.4921	45.4665	27.6331	37.6428	10	cos_per_21_ph_10	.84345013127653500895	4.9649783543543302144	.0002829199999999999814
ENSDART00000104683	2062.25	1788.92	2046.07	1727.84	3104.96	3332.04	2352.45	2247.96	2561.21	1435.23	3945.93	2786.61	18	ct18-spike	.84858839775976002695	5.0722120393235696767	.00024163000000000000233
ENSDART00000104691	458.55	363.486	134.804	286.971	937.701	627.197	418.055	520.519	126.776	292.543	804.61	493.961	17	ct17-spike	.86582062389908898137	5.4720505137282904329	.00013613000000000001293
ENSDART00000104715	643.623	537.087	256.569	470.168	209.151	297.996	700.543	463.734	188.391	182.157	281.643	256.203	1	ct01-spike	.88414084721812002954	5.9841104213249902699	.000067470000000000002844
ENSDART00000104720	54.5608	80.8312	176.567	242.284	68.8575	56.8422	77.4399	102.878	179.408	40.5919	62.0459	84.4816	10	cos_per_20_ph_10	.82441631333460596576	4.6061971437851099154	.00048543000000000001946
ENSDART00000104724	4234.52	2318.23	1718.37	1418.96	297.562	931.413	1962.2	2558.94	1487.22	80.4794	357.473	352.443	1	cos_per_26_ph_1	.83493538622169094499	4.7975055926037901699	.00036317000000000000757
ENSDART00000104736	338.336	377.805	168.877	241.564	42.2015	169.915	347.908	285.531	72.3373	10.0831	28.481	80.0302	2	ct02-spike	.86080525482333203335	5.3486358072685700193	.00016211999999999999957
ENSDART00000104767	381.123	216.527	277.438	217.234	508.643	299.586	231.706	181.834	225.012	177.658	442.402	113.855	16	ct16-spike	.81195904006981400869	4.3987948066437203565	.00066879000000000005284
ENSDART00000104797	396.334	424.809	1180.74	580.808	309.699	535.677	417.957	699.409	1049.46	886.135	740.373	356.162	9	ct09-spike	.85848263717221995339	5.2935546188242499355	.0001753799999999999912
ENSDART00000104965	99.6286	189.508	132.834	68.1111	78.6725	57.1954	150.339	109.217	136.464	105.106	56.4973	86.5657	5	ct05-sine	.81606838889330801656	4.4651110901186203961	.00060327000000000004318
ENSDART00000104995	16.2693	46.1008	14.8555	21.4123	21.5953	25.4265	22.7528	50.5026	28.2879	15.3087	19.0308	20.9066	4	ct04-spike	.9361298984192419903	8.4182160374434005234	.000003757599999999999819
ENSDART00000105013	59.085	17.7737	34.1648	22.616	60.2376	64.056	88.5577	43.9164	28.9885	36.776	33.6393	48.3158	22	cos_per_28_ph_22	.85752845912631703307	5.2712879808561696748	.0001810699999999999994
ENSDART00000105048	229.841	337.559	194.657	431.872	364.549	323.035	194.261	292.814	153.75	384.223	371.747	466.153	16	ct16-box1	.81611242236232894864	4.4658324801368403101	.0006025899999999999616
ENSDART00000105140	774.457	1302.18	1668.62	572.858	370.024	311.281	596.478	1391.69	1341.31	1162.12	218.454	400.539	6	cos_per_25_ph_6	.93925026453314996999	8.6535080256281293742	.0000029407000000000000678
ENSDART00000105218	308.835	436.045	431.144	91.2486	124.667	138.206	238.793	282.829	800.374	28.3988	98.7737	126.349	7	ct07-spike	.85272263551986005048	5.1621971389606500225	.00021194000000000000707
ENSDART00000105309	446.207	840.363	1052.49	475.193	466.681	541.545	568.163	881.269	910.56	710.796	454.265	710.353	6	ct06-spike	.87920958554027694998	5.8356410294228000524	.000082392000000000006682
ENSDART00000105344	105.598	131.699	92.435	93.1856	515.543	275.424	149.65	100.683	65.4734	75.4809	725.694	172.993	17	ct17-spike	.95943929368992397766	10.762145022320099841	.00000040378999999999999135
ENSDART00000105403	4185.14	2208.26	2217.94	1750.49	6474.65	931.952	1760.87	3344.02	2426.68	900.585	8322.33	1859.66	16	ct16-spike	.8994897637196610507	6.5098742532196798294	.000034048000000000003338
ENSDART00000105466	1327.75	1390.11	1873.48	1164.13	1094.99	1101.92	1543.28	1463.49	1854.17	1245.04	1049.15	1295.2	7	ct07-spike	.88213296299209598139	5.9226042960062299514	.000073265999999999999528
ENSDART00000105474	3753.23	2731.2	1893.25	2333.97	1119.68	2162.67	2823.04	2443.41	1590.12	409.01	1286.89	2278.37	1	cos_per_24_ph_1	.82075099365746895241	4.543157164749369592	.00053474999999999996061
ENSDART00000105485	410.075	235.9	719.934	207.174	280.155	235.67	155.977	321.815	528.418	90.8901	117.121	280.962	8	ct08-spike	.84440936318422998852	4.9846268444110002349	.00027482999999999999617
ENSDART00000105522	1514.85	1253.25	2903.54	688.352	1672.81	1063.95	868.312	988.316	2433.8	1598.46	914.333	780.972	8	ct08-spike	.87137143105878600569	5.6163556398035900941	.00011129000000000000004
ENSDART00000105523	1764.31	1438.2	2589.79	950.052	957.543	1384.03	2086.16	2227.57	2241.41	1239.02	983.727	1578.02	4	ct04-box1	.81530046401600697603	4.452567663809579912	.00061512000000000003307
ENSDART00000105529	126.041	10.3997	13.8597	47.0524	2333.69	29.7781	589.944	61.1713	12.2749	16.9727	1536.43	14.4117	16	ct16-spike	.95052794239661797526	9.6762886089627500041	.000001073699999999999986
ENSDART00000105583	436.607	478.942	529.366	390.824	353.245	263.008	338.355	410.267	567.356	375.651	218.61	303.251	7	ct07-rigid	.88244697522338699791	5.9321256127098296318	.000072335000000000004546
ENSDART00000105584	259.855	359.135	570.952	372.145	262.925	222.678	323.803	356.401	631.968	378.312	89.6228	321.374	9	ct09-spike	.86598307671535501573	5.4761550109398298147	.00013535000000000001023
ENSDART00000105586	36.9137	36.0515	32.8338	39.1521	40.2926	122.132	47.7699	34.8606	23.6108	20.0979	73.1478	68.6812	19	ct19-spike	.84425247845259698831	4.9814019244843201761	.00027614000000000002259
ENSDART00000105590	16477.5	8990.36	13335	12052.6	3848.59	12243.1	14365.3	13292.3	14070.4	9049	4126.62	14467	3	ct03-box2	.8903707749372470337	6.1849220024634501414	.000051737000000000002875
ENSDART00000105592	180.05	271.887	467.656	253.559	407.78	228.07	268.373	331.026	551.35	158.07	134.96	177.655	7	ct07-spike	.8283128933325719645	4.6752013501430802478	.00043692999999999997899
ENSDART00000105608	239.126	871.922	485.136	356.097	154.973	221.614	233.732	423.973	490.122	248.265	157.705	299.107	5	ct05-spike	.81131898087599396696	4.3886410466502203676	.00067947000000000005223
ENSDART00000105628	205.258	353.403	295.373	777.538	692.77	690.473	203.093	81.1546	189.102	203.966	416.222	635.014	16	cos_per_28_ph_16	.8572203906313939914	5.2641429802289101403	.0001829400000000000069
ENSDART00000105672	329.618	284.312	169.074	74.8971	1216.97	168.001	192.27	55.9225	77.735	77.1004	644.597	62.4629	16	ct16-spike	.89629733135740796701	6.3915165848243296054	.000039589999999999998727
ENSDART00000105680	101.617	22.3392	49.767	231.868	90.1423	86.6031	61.3644	30.3911	78.4716	135.827	68.3167	85.465	12	ct12-spike	.82166592739275501334	4.5587286949124097291	.00052209000000000001067
ENSDART00000105694	261.446	192.691	253.875	173.344	178.283	145.941	184.681	266.387	328.825	226.688	169.591	121.792	4	cos_per_27_ph_4	.82848422072718097553	4.6782841062249200803	.0004348900000000000053
ENSDART00000105698	346.874	639.835	1113.89	385.894	430.163	307.973	484.99	563.993	909.908	1201.62	307.302	55.433	8	cos_per_25_ph_8	.8202056445775679494	4.5339267435856003274	.00054239999999999995682
ENSDART00000105733	121.789	31.044	59.7528	68.4317	38.3084	82.5933	139.096	62.1586	51.966	38.2123	59.8014	41.8586	0	ct00-spike	.89416884802907004026	6.3154373141124597879	.000043662000000000003109
ENSDART00000105750	135.704	139.208	312.357	114.932	125.874	94.3949	106.377	133.028	245.566	123.641	110.236	130.348	8	ct08-spike	.95372417768730699539	10.030303969821600774	.00000077303000000000003398
ENSDART00000105809	3326.59	2546.31	1285.89	2096.79	1116.11	938.048	2571.11	4360.5	2770.99	206.172	982.672	179.414	1	cos_per_27_ph_1	.81323313182695700085	4.4191457218325096434	.00064791999999999996297
ENSDART00000105825	45.5853	65.966	38.4689	83.5782	41.0795	42.639	36.2607	61.7711	20.0813	101.573	53.7374	56.6555	12	ct12-spike	.81265875071964599474	4.4099481597424796675	.00065726000000000000568
ENSDART00000105868	276.55	494.677	862.392	413.48	211.168	204.047	229.637	327.972	716.522	756.162	237.669	399.864	9	ct09-spike	.84465433140859402794	4.9896713488951895954	.00027279000000000002248
ENSDART00000105896	493.49	82.1942	68.9573	24.2227	1935.95	87.3598	160.433	74.858	406.187	73.7642	2946.72	101.485	16	ct16-spike	.96004638401358100008	10.848782344604000372	.00000037484999999999999823
ENSDART00000105955	461.365	516.667	716.065	547.256	320.084	331.896	339.3	380.209	757.246	508.556	220.972	485.081	9	ct09-spike	.86262780428480401174	5.3927587417027602612	.00015226000000000000927
ENSDART00000105975	50.8969	45.7855	27.728	41.9678	246.465	122.974	49.5624	35.0851	47.1637	130.928	126.04	116.995	17	cos_per_23_ph_17	.81487239157225999087	4.4456059134146697076	.00062180000000000004365
ENSDART00000105999	51.0553	67.7668	10.3377	38.8514	308.664	31.7347	25.1425	45.7074	37.4255	44.9415	211.911	94.716	16	ct16-spike	.94336524957326095553	8.9921007131481101027	.0000020853999999999999728
ENSDART00000106053	690.555	628.159	473.076	827.479	201.553	366.786	524.458	531.62	728.657	491.552	190.581	370.036	5	ct05-box2	.83353798836404402461	4.771147819054760042	.00037786999999999998541
ENSDART00000106120	151.052	117.982	133.788	72.4011	369.06	66.5114	133.714	111.631	108.86	268.85	317.862	175.153	15	ct15-spike	.84939140508282995334	5.0894232116915603115	.00023561999999999999719
ENSDART00000106161	23.0448	21.3999	24.4366	66.6439	18.6441	33.0189	22.2382	22.5782	26.9726	93.9301	20.3409	29.1136	12	ct12-spike	.95192586666765799386	9.8268818970862596984	.00000093251999999999998842
ENSDART00000106163	100.055	21.9632	19.5276	36.3152	260.857	290.077	80.8096	33.1648	32.6682	112.071	299.993	34.8457	18	cos_per_21_ph_18	.83518990952802796279	4.8023392162367803948	.00036055000000000000894
ENSDART00000106181	290.572	312.92	199.424	179.87	2793.06	350.569	704.863	253.038	202.923	218.079	956.971	103.477	16	ct16-spike	.8286902517729940465	4.6819968458483502971	.00043244000000000002706
ENSDART00000106186	279.168	361.134	144.56	261.433	141.834	153.907	259.674	289.243	144.735	76.7568	98.6749	124.799	2	ct02-spike	.83839315954281101728	4.8640570353153202987	.00032871000000000001563
ENSDART00000106213	226.532	274.121	29.2651	172.962	255.407	229.268	374.561	246.67	34.8311	302.526	202.681	182.153	20	ct20-box2	.83798729848220299132	4.8561450590393899773	.00033261999999999999683
ENSDART00000106251	68.0459	53.3103	46.8519	165.075	113.195	81.4889	78.5906	74.6944	67.0072	135.402	109.944	69.6815	13	ct13-spike	.92813393127226895274	7.8846080167870198352	.0000066849000000000001506
ENSDART00000106336	180.751	184.262	295.824	325.874	223.737	192.025	323.431	401.32	326.058	58.5244	95.9843	254.175	9	cos_per_20_ph_9	.81156394508890394857	4.3925216297462696957	.00067537000000000000678
ENSDART00000106357	184.194	166.483	398.596	211.366	168.621	159.506	189.104	270.403	615.239	383.396	187.881	344.788	9	ct09-spike	.82352490904782504888	4.5907028514085501669	.00049709000000000005352
ENSDART00000106428	166.43	159.086	200.392	315.323	192.685	125.879	174.406	195.302	246.669	356.532	149.559	36.8477	11	ct11-spike	.85900538315423302649	5.3058417889417102131	.00017232999999999999837
ENSDART00000106669	199.791	341.87	169.444	77.2606	102.443	106.705	187.167	164.091	145.576	120.86	63.4441	75.568	3	cos_per_25_ph_3	.81331428617012402338	4.4204483141884995945	.00064659999999999999594
ENSDART00000106678	127.582	120.822	118.451	77.036	529.756	359.782	128.758	140.314	75.5902	118.972	911.319	127.029	17	ct17-spike	.91534488123914903301	7.1884400123054303933	.000014831999999999999617
ENSDART00000106681	734.206	906.506	1108.44	613.429	550.766	617.512	794.844	692.287	1116.78	545.368	819.485	669.46	7	ct07-spike	.87119398959231497681	5.6116089505648396596	.00011202000000000000152
ENSDART00000108527	231.492	330.997	72.0516	315.207	214.459	206.223	284.278	259.756	137.21	255.24	304.325	356.933	20	ct20-box2	.81100951777334095993	4.3837483763323996655	.00068468000000000001082
ENSDART00000108535	22.3735	27.2029	33.4071	65.6393	24.8576	26.8489	21.5416	22.3372	27.6303	37.0821	22.7621	28.9737	11	ct11-spike	.834437276543038009	4.7880754197988295573	.00036835999999999997651
ENSDART00000108549	952.186	1406.65	1437.77	671.703	684.292	837.75	1520.42	1237.64	1497.54	560.595	465.088	786	4	ct04-box1	.89791431757829198723	6.450808914284340112	.000036700999999999999791
ENSDART00000108558	497.212	990.056	1201.79	909.895	1909.88	1532.36	479.948	546.745	788.977	477.828	1712.97	855.45	17	ct17-spike	.84019785272633396023	4.8995703988600602941	.0003117600000000000102
ENSDART00000108562	327.058	395.392	765.05	369.176	345.048	305.69	485.129	455.667	872.399	672.392	255.946	199.696	9	ct09-spike	.87043614918557399296	5.591438488987379607	.00011521000000000000316
ENSDART00000108612	778.791	558.84	462.325	453.271	366.628	235.898	850.864	947.337	526.144	447.571	298.622	342.633	2	ct02-spike	.85744362880031899099	5.2693183867993997893	.00018158000000000000637
ENSDART00000108613	260.786	111.097	55.866	119.568	101.879	70.3284	300.427	140.905	66.1028	133.446	102.336	46.0444	1	ct01-spike	.92916485978638296839	7.9484734255100404354	.000006229999999999999644
ENSDART00000108645	515.681	563.812	1018.28	572.009	609.115	741.337	580.476	779.298	957.277	695.603	793.784	546.846	8	ct08-spike	.82136520372878696339	4.5535986883039099027	.00052623000000000003541
ENSDART00000108662	5906.23	3372.89	171.177	2214.15	812.422	2825.33	3150	2519.16	264.517	175.821	894.094	2844.75	0	ct00-sine	.8276535931688739911	4.6633772083642597295	.00044485999999999999285
ENSDART00000108665	220.712	158.156	30.8605	210.882	110.689	156.33	198.826	131.711	40.0585	187.294	120.007	139.485	19	ct19-box2	.81757154829198996904	4.4898695750029498086	.00058056999999999997931
ENSDART00000108689	53.9177	95.2531	39.5028	62.7033	481.049	218.696	64.3193	112.841	71.9415	61.7216	285.567	32.9626	17	ct17-spike	.88110393189088198618	5.891650788303669728	.000076383000000000003736
ENSDART00000108704	222.72	154.154	43.8493	250.229	145.09	257.292	212.981	178.213	66.2701	234.616	152.244	236.308	19	ct19-box2	.86806543969190397281	5.5293888960910697605	.00012562000000000000683
ENSDART00000108715	377.452	455.6	724.568	475.951	489.249	520.176	361.427	417.926	724.139	595.409	533.85	522.875	9	ct09-spike	.86015687426888898237	5.3331318090015296107	.0001657399999999999954
ENSDART00000108717	447.33	348.962	435.898	212.136	286.593	114.216	345.407	453.527	637.723	162.562	145.429	230.517	4	ct04-box1	.84575557746236695866	5.0124844841580102894	.0002637699999999999767
ENSDART00000108733	916.211	636.371	135.916	451.168	551.775	566.227	957.016	376.345	169.901	35.5008	248.099	181.134	1	ct01-spike	.82303018129023697291	4.5821492309795299747	.00050365000000000001781
ENSDART00000108773	50.0725	65.5948	30.9158	103.929	33.292	63.6587	43.3862	28.8338	33.6196	108.153	46.0062	60.5934	12	ct12-spike	.87985650182462904478	5.8546287592348198459	.000080300000000000000284
ENSDART00000108794	1070.44	592.853	207.88	738.961	308.007	371.095	897.298	487.75	378.978	240.112	134.448	315.947	1	ct01-spike	.85317812405075699189	5.1723242715067696551	.00020885000000000000786
ENSDART00000108806	18.9775	24.0893	36.0128	50.3192	31.9922	25.7868	35.954	16.6457	34.4312	57.598	31.2174	41.6299	11	ct11-spike	.81407243923047001299	4.4326542084424600532	.00063444000000000000394
ENSDART00000108823	2496.14	2633.41	2363.22	1501.67	1185.61	1216.05	1593.11	1967.78	1648.31	581.404	771.036	1063.7	4	ct04-sine	.84164200305465997065	4.9283869127500903318	.00029869000000000000151
ENSDART00000108830	2146.96	488.498	928.282	531.13	4617.76	625.149	760.086	810.178	904.346	426.857	2881.43	494.637	16	ct16-spike	.88985567553334599111	6.1677135202286601512	.000052917000000000001742
ENSDART00000108842	28.0792	18.3986	163.122	19.4404	39.9283	38.5181	25.9412	26.3507	68.0053	33.7689	30.4979	32.4696	8	ct08-spike	.84432551562246305199	4.9829027200358702032	.00027553000000000001319
ENSDART00000108857	882.865	1282.08	947.188	763.939	755.041	804.798	1068.12	1041.87	740.54	261.192	443.226	587.785	4	cos_per_23_ph_4	.81733478342875398592	4.485951605485190008	.00058410000000000004885
ENSDART00000108868	435.159	489.154	135.691	513.171	367.837	492.55	503.295	452.279	144.217	304.276	709.26	606.615	21	ct21-box2	.82434992314572297367	4.6050394853162597286	.00048629000000000000784
ENSDART00000109017	219.118	226.529	31.3858	280.932	203.461	223.193	231.535	163.347	64.0896	156.171	142.683	150.497	20	ct20-box2	.82046675644747701917	4.5383415174633201516	.00053872999999999995977
ENSDART00000109037	18.4304	39.5688	34.2122	91.3017	18.649	30.1221	27.4339	17.8772	39.6722	52.9227	15.1995	13.6909	11	ct11-spike	.86587219684125504848	5.4733527945156597028	.00013589000000000000168
ENSDART00000109046	35.6178	45.1632	28.9003	70.2108	33.9949	25.9685	53.6277	41.1689	54.5377	84.4827	30.2792	25.0096	12	ct12-spike	.83479403190569800852	4.7948255407140996098	.00036464000000000000535
ENSDART00000109056	33.3304	26.2718	109.971	20.8391	35.1937	17.5416	35.6804	17.1875	65.9707	29.5688	35.7413	41.2977	8	ct08-spike	.88372528728449695201	5.9712583386083499803	.000068639000000000004696
ENSDART00000109060	18.3511	10.8969	21.1123	19.8481	17.8305	31.0232	15.8053	20.3669	26.823	20.3261	18.241	61.0447	20	ct20-spike	.8191739669239169741	4.5165679500416002767	.00055712000000000003273
ENSDART00000109084	2494.93	1591.78	580.297	1391.34	1019.86	1023.64	2590.72	1298.16	613.504	104.718	558.262	904.402	1	ct01-spike	.90521744454769803578	6.7362226485251603947	.000025644000000000000453
ENSDART00000109094	2669.18	2834.38	919.158	2628.55	2270.8	3738.97	3073.15	2329.62	1009.86	1430.46	3215.15	3145.16	21	ct21-rigid	.85656637170544203119	5.2490449052692396137	.00018694999999999999053
ENSDART00000109099	41.2078	26.9349	33.9202	23.8639	87.7319	29.7935	31.6935	27.5311	22.3472	43.4245	86.9337	25.4863	16	ct16-spike	.96027687365011804577	10.882183649562700012	.00000036431000000000001105
ENSDART00000109105	747.817	403.843	225.96	349.927	9602.85	157.36	3833.45	831.169	1283.01	278.754	9059.94	238.129	16	ct16-spike	.95624194818541896623	10.335405454436900285	.00000058691000000000000585
ENSDART00000109119	27.9706	80.8878	15.5649	28.5118	15.0618	18.2879	31.5365	52.8099	14.4712	17.4034	15.8112	14.1686	3	ct03-spike	.93258124301071598783	8.1701010050401592366	.0000048942999999999998794
ENSDART00000109131	2301.54	2346.57	513.287	1460.59	633.761	1356.58	1880.71	1856.55	360.037	180.253	798.519	1215.94	2	ct02-spike	.84091545864139505273	4.9138446677556997244	.00030520999999999998652
ENSDART00000109138	561.235	1299.47	3770.02	1514.83	1058.07	711.901	609.049	1643.7	2801.49	3263.22	1124.49	1439.71	9	ct09-spike	.83805301171925694614	4.8574242518178998296	.00033198000000000000296
ENSDART00000109144	110.479	14.4184	28.1636	41.9783	79.9624	180.738	164.666	140.286	37.2876	57.0476	89.8453	37.7018	23	cos_per_28_ph_23	.81809493253503395849	4.4985549061521901137	.00057282999999999997549
ENSDART00000109145	81.0129	36.1471	217.992	90.3147	75.4672	51.5307	68.3346	55.1964	143.997	123.854	51.5346	77.0572	9	ct09-spike	.90607835588365204238	6.7719312144151997401	.000024536999999999999024
ENSDART00000109157	468.616	698.503	1079.44	666.749	786.671	521.065	570.042	777.599	855.445	414.641	582.981	651.124	7	ct07-spike	.81094671360722103692	4.382756744351570255	.00068574000000000000406
ENSDART00000109181	301.479	104.353	55.1176	78.2822	2070.23	57.8899	81.8543	117.663	98.8934	150.256	1398.21	186.778	16	ct16-spike	.96954791591102995607	12.51922634630400033	.000000097978999999999993458
ENSDART00000109201	373.601	497.08	147.399	317.176	170.137	246.063	243.62	487.161	169.661	190.464	264.314	247.628	3	ct03-spike	.88804931178352697341	6.1082532072071096252	.000057219999999999997644
ENSDART00000109236	133.066	137.821	344.611	144.424	84.7501	136.02	146.053	156.668	203.496	101.948	71.917	84.7788	7	ct07-spike	.83947110063088103971	4.8852034062113300905	.00031849999999999998972
ENSDART00000109238	28.8766	47.5821	11.1305	60.0067	27.1267	28.1322	24.8947	28.84	21.1565	78.7605	15.4196	25.2585	12	ct12-spike	.86927608566358705033	5.5608795117075597858	.00012021000000000000272
ENSDART00000109240	421.255	1202.08	280.199	722.384	254.614	631.79	572.824	1224.28	263.171	164.75	475.709	798.191	4	ct04-spike	.8302468673813030442	4.7102451470651400811	.00041429999999999998729
ENSDART00000109300	7709.15	5661.54	640.094	3209.25	983.907	3271.36	9274.1	4942.76	736.037	439.12	418.096	1824.39	1	ct01-spike	.92151982036442303681	7.50416288271441978	.000010265000000000000822
ENSDART00000109301	114.547	78.8915	112.572	98.5846	275.776	128.998	46.655	92.7416	86.0568	238.187	280.962	98.0942	15	ct15-spike	.89082004436298800609	6.2000247762688296405	.00005072499999999999969
ENSDART00000109312	62.2678	36.3275	140.07	294.475	206.848	184.409	92.1065	43.0481	87.8983	185.885	152.635	37.0048	14	cos_per_23_ph_14	.81690987660326397357	4.4789374277647100442	.00059047999999999999793
ENSDART00000109317	298.384	391.322	781.095	381.26	377.575	418.241	408.766	455.943	604.438	311.004	411.488	396.675	8	ct08-spike	.9018156032821309509	6.5995193129723404013	.000030408999999999999724
ENSDART00000109462	165.789	254.241	234.544	207.108	165.858	148.875	209.464	248.089	280.203	107.019	84.8322	138.177	7	cos_per_22_ph_7	.88487361027806699099	6.0069315538753800254	.000065446999999999998666
ENSDART00000109464	2225.71	2620.89	3499.74	1666.2	573.743	1096.88	1070.53	1430.94	3176.95	4242.14	745.192	417.298	6	cos_per_27_ph_6	.85025909641521102422	5.1081634837103901958	.00022927000000000000548
ENSDART00000109466	3182.7	3171.04	3777.91	2565.14	1883.14	1361.24	2683.69	3840.54	3769.56	2180.62	1435.27	3580.7	6	cos_per_22_ph_6	.83735958200248095107	4.8439614049329300371	.00033872999999999997729
ENSDART00000109513	377.311	1656.37	269.126	1321.53	635.185	377.7	507.32	1702.55	290.423	79.0465	283.37	358.76	4	ct04-spike	.84124574762612802648	4.9204443008100700041	.00030223000000000001166
ENSDART00000109521	478.354	628.594	947.346	820.056	394.404	416.819	473.143	567.804	1121.69	1206.31	377.358	678.678	10	ct10-spike	.89642611658497894922	6.3961907505480901648	.00003935400000000000302
ENSDART00000109528	150.965	177.56	217.093	242.888	327.376	250.451	223.235	220.532	229.864	344.762	261.18	199.202	15	cos_per_22_ph_15	.81187944806334599868	4.3975296489377297959	.00067011000000000001987
ENSDART00000109546	14.1885	13.0441	26.196	16.8929	40.7836	46.8696	28.5978	26.3335	16.3456	37.8352	32.788	59.886	19	ct19-spike	.84051032704214101443	4.9057751701671099553	.00030888999999999997839
ENSDART00000109552	248.509	320.634	543.73	399.779	385.302	378.109	264.32	430.846	675.376	320.017	369.282	386.826	8	ct08-spike	.85598359320130501526	5.235671484157260025	.0001905800000000000083
ENSDART00000109583	7377.07	9753.51	11901.4	7450.37	7923.9	8723.88	9116.39	8925.1	9786.08	8662.26	7249.5	7190.19	7	ct07-spike	.8176732015992379532	4.4915538333456801467	.00057905999999999994803
ENSDART00000109597	18.4219	40.7245	22.852	87.9192	24.4292	45.9972	27.3786	23.6243	14.3373	61.8087	32.5062	50.9205	12	ct12-spike	.81680510495110203451	4.4772112767961500523	.00059206000000000004718
ENSDART00000109604	1264.17	1303.15	1472.95	1196.47	234.559	716.985	1057.52	1586.6	1750.93	596.638	288.226	1227.61	6	cos_per_22_ph_6	.87140724952537695902	5.6173149196455600674	.00011113999999999999639
ENSDART00000109608	306.533	131.393	26.3434	39.7478	29.3033	35.4629	154.348	35.2019	14.8897	111.329	31.586	25.2584	1	ct01-spike	.8451677737436530391	5.0002799452950998926	.00026855999999999999013
ENSDART00000109625	382.031	328.954	588.83	383.103	261.062	348.09	336.169	442.774	578.341	452.071	165.788	390.85	9	ct09-spike	.81145176266539198462	4.3907436589694901485	.00067723999999999996008
ENSDART00000109634	514.655	1050.45	637.598	661.067	380.419	619.458	757.181	903.487	859.478	645.671	368.195	638.168	4	ct04-rigid	.86135533408142594958	5.361868029818530168	.00015908999999999999639
ENSDART00000109666	73.8421	70.0697	28.4743	77.0556	82.4946	112.663	81.8528	57.4071	25.0023	110.351	80.7776	63.7176	19	ct19-box2	.84977157990043894475	5.0976158092350898343	.00023282000000000001045
ENSDART00000109685	468.866	578.676	981.512	408.544	224.975	357.119	350.362	469.448	710.295	522.599	198.062	263.844	7	ct07-spike	.86460471678986905442	5.4415477401887804021	.0001421100000000000065
ENSDART00000109692	902.522	2416.78	3322.16	488.308	588.589	537.899	648.271	1087.6	1929.72	2834.1	1494.43	1054.02	7	cos_per_28_ph_7	.81839315777229004745	4.5035189238565402903	.0005684499999999999666
ENSDART00000109722	740.666	672.973	2489.53	943.982	729.016	1220.42	1711.87	1240.27	3424.99	2393.47	1025.96	408.884	9	ct09-spike	.84041060885986196283	4.9037932682112703731	.00030979999999999999509
ENSDART00000109730	57.6862	22.9555	52.0071	55.0621	377.864	110.548	51.7549	75.9645	54.2914	144.001	189.115	76.7592	16	ct16-spike	.85260961533402401802	5.1596909927926697392	.00021270999999999998784
ENSDART00000109735	287.552	523.847	407.567	432.97	274.406	267.146	305.608	396.017	452.156	225.343	182.876	187.068	7	cos_per_23_ph_7	.84674817192342599625	5.033239508412219898	.00025584000000000001705
ENSDART00000109754	17.6218	24.753	11.8702	44.2595	15.6574	127.636	84.403	19.819	12.7791	57.8083	15.3137	155.332	21	ct21-spike	.9023782454827630195	6.6216599923920700377	.000029577000000000001591
ENSDART00000109764	336.867	319.104	518.15	342.617	309.707	287.259	365.797	391.689	517.118	215.288	289.41	300.881	7	ct07-spike	.89255576059548102918	6.2592089150841303535	.000046960999999999999814
ENSDART00000109770	84.0643	49.8418	127.136	168.087	139.108	141.475	97.6354	155.417	311.695	163.148	61.8378	26.2779	13	cos_per_20_ph_13	.81324745458362901473	4.4193755582254201641	.00064769000000000002785
ENSDART00000109782	309.675	170.883	71.9637	137.96	129.87	151.065	206.352	117.718	55.7231	81.3815	71.0057	106.918	1	ct01-spike	.84576204638184204754	5.0126191535119897225	.00026372000000000000259
ENSDART00000109789	502.918	689.109	1078.83	968.665	176.573	412.92	778.045	538.957	969.378	869.51	271.324	597.116	10	ct10-spike	.8126660591707499659	4.4100649515940402168	.0006571399999999999594
ENSDART00000109837	853.992	1395.98	1772.22	1142.01	960.24	697.491	1067.13	1401.29	1351.91	895.499	593.224	1137.05	8	cos_per_21_ph_8	.93466675994850001441	8.3135519439266793995	.0000041976000000000002649
ENSDART00000109857	2791.34	3861.57	3666.26	2357.29	2562.45	2188.1	3628.86	3196.87	3466.87	2795.15	1322.78	2311.81	5	ct05-sine	.86677625788969403509	5.4962953037840200921	.00013158000000000001075
ENSDART00000109862	19.4771	41.0785	28.9108	22.3879	77.0897	32.6221	30.4815	30.2648	38.8437	42.459	58.7337	22.3701	16	ct16-spike	.86737664466669095464	5.5116515953298303998	.00012877000000000000208
ENSDART00000109865	94.6197	108.332	51.383	68.3441	50.8479	53.0686	80.9433	106.878	24.7816	21.963	51.7997	51.1179	2	ct02-spike	.87270358263761604878	5.6522862482244899951	.0001058900000000000043
ENSDART00000109866	42.0697	41.1987	37.5143	27.2185	447.236	46.8293	48.8121	93.5632	82.6316	244.584	303.94	43.5164	15	ct15-spike	.90096984219726905518	6.5665749433845901351	.000031695000000000000625
ENSDART00000109869	172.788	169.534	51.8263	49.724	1418.3	90.7019	215.409	114.138	136.295	129.055	454.404	32.6789	16	ct16-spike	.83231840726419703547	4.7483894560049302314	.000391069999999999981
ENSDART00000109873	282.659	399.125	709.129	425.616	375.681	416.192	292.149	318.735	533.336	518.889	261.178	289.377	9	ct09-spike	.86732699757441700239	5.510378084435940238	.00012899999999999999141
ENSDART00000109917	4326.07	3220.32	4393.74	2363.66	1931.76	2185.62	2324.75	3064.75	3616.58	3672.28	1015.33	567.124	4	cos_per_27_ph_4	.82146945975815399699	4.5553758544952103193	.00052479000000000002209
ENSDART00000109930	17.9987	50.1054	25.7273	21.0789	21.2009	19.1425	30.1021	34.6231	17.8558	15.3741	12.5883	18.9695	3	ct03-spike	.85567263609464905283	5.2285663336241299248	.00019253999999999999631
ENSDART00000109935	257.468	1691.61	144.054	874.089	375.094	266.684	355.371	1136.57	219.351	70.0557	176.883	190.554	4	ct04-spike	.88076690185312700443	5.8815945769144200028	.000077426000000000000357
ENSDART00000109936	35.0433	24.6948	22.9207	74.165	28.6685	23.4386	36.3832	35.3214	29.6652	93.6127	15.324	20.8485	12	ct12-spike	.94591984440453602545	9.2208911827895700952	.0000016628999999999999945
ENSDART00000109947	200.036	177.893	143.752	176.711	219.831	251.076	293.695	278.998	133.15	39.556	113.432	136.353	23	cos_per_28_ph_23	.84186816210898696156	4.9329323077956104271	.00029668000000000001228
ENSDART00000110001	325.16	209.619	742.75	442.522	208.969	327.218	239.929	303.409	650.377	126.951	110.208	138.022	8	ct08-spike	.87392230368929801898	5.6856209244388002944	.00010113000000000000244
ENSDART00000110058	3327.37	2137.71	2249.38	1803.7	1792.92	2415.55	3101.99	2615.13	2611.82	1327.29	1031.05	3418.21	2	ct02-box2	.81426419399804195187	4.4357519859790199845	.00063139000000000001112
ENSDART00000110067	212.939	223.596	420.175	287.829	179.653	260.512	211.008	267.317	513.068	306.235	224.626	196.701	9	ct09-spike	.94875428005078199512	9.4939383585996406367	.0000012765999999999999831
ENSDART00000110080	196.359	148.357	37.6164	141.096	110.467	132.797	226.836	148.526	39.2749	108.108	63.5179	78.217	1	ct01-spike	.8209306496457670077	4.5462062895015700192	.00053224000000000001344
ENSDART00000110133	702.299	689.163	82.4312	107.427	59.3471	381.956	598.674	731.419	87.2067	169.086	147.893	186.496	2	ct02-spike	.94792176539463002261	9.4114949448270408539	.0000013817000000000000441
ENSDART00000110167	353.939	387.237	416.311	335.854	219.054	277.525	334.901	248.235	365.476	347.484	165.858	295.386	5	ct05-box2	.82804427792230794747	4.6703764624155503782	.00044014999999999999221
ENSDART00000110173	199.596	325.426	365.036	280.206	209.369	237.735	196.328	245.654	360.648	253.413	169.32	189.309	8	cos_per_23_ph_8	.85940501913097000486	5.3152779245217196546	.00017002000000000000186
ENSDART00000110198	60.8557	56.9769	26.434	18.2849	544.162	68.1556	193.344	67.6337	75.798	63.4826	241.039	41.8426	16	ct16-spike	.85168057465379698456	5.139190181075940167	.00021913999999999999235
ENSDART00000110220	5882.44	5948.29	8738.83	7073.89	6286.06	4756.73	5492.45	8202.74	7754.78	4645.99	4338.49	7259.6	9	cos_per_20_ph_9	.88060242229857599305	5.8767013691815002119	.000077939000000000000358
ENSDART00000110283	277.758	168.921	207.211	200.244	511.179	179.667	271.196	198.47	236.382	153.729	316.821	188.244	16	ct16-spike	.82010874199557803887	4.5322905585569799314	.00054376999999999995217
ENSDART00000110295	226.126	81.7566	206.63	287.538	296.718	153.183	191.358	265.93	392.047	298.539	188.239	75.908	13	cos_per_20_ph_13	.88817492805259601329	6.1123442095842701605	.000056911999999999999915
ENSDART00000110314	60.5916	43.3643	32.4998	20.136	325.447	29.3117	35.7346	39.7305	77.2485	99.8402	456.95	26.3929	16	ct16-spike	.96551866725142398984	11.728164981951399781	.0000001811399999999999928
ENSDART00000110325	66.371	67.7561	47.1629	40.5766	1816.2	52.8696	300.742	39.9003	84.6187	70.8202	3532.31	44.2539	16	ct16-spike	.93807926875634195518	8.5631929935598396497	.0000032287999999999999013
ENSDART00000110355	93.2234	167.813	18.164	64.9818	79.8547	52.9076	56.5656	123.801	40.0244	40.3438	40.0069	50.3236	3	ct03-spike	.88749775650400097859	6.0903668127511698671	.000058588000000000002164
ENSDART00000110376	388.286	612.72	1014.02	593.37	478.279	427.579	581.039	574.65	736.315	455.169	241.292	240.317	8	cos_per_22_ph_8	.84605223400252205224	5.0186682505627402406	.00026138000000000002161
ENSDART00000110388	229.997	262.553	316.253	297.794	152.001	139.599	174.66	271.772	379.436	377.535	206.695	244.794	7	cos_per_27_ph_7	.86142476459112304887	5.3635433687231497402	.00015871000000000000342
ENSDART00000110408	583.858	885.139	851.304	561.433	349.601	496.078	679.906	744.892	672.243	465.886	227.123	744.202	6	cos_per_22_ph_6	.90986626594635899856	6.9347754475495699822	.000020103999999999999285
ENSDART00000110431	107.526	87.4943	88.4081	96.3801	112.662	122.544	86.9111	67.9888	77.5573	99.5049	120.118	123.141	18	cos_per_23_ph_18	.92508807608082599394	7.7033974534405196266	.0000081839999999999999092
ENSDART00000110463	190.2	144.335	186.004	358.146	571.091	323.002	183.091	287.532	116.194	126.84	278.243	449.325	17	cos_per_28_ph_17	.83137321615267800734	4.7309060256605599548	.00040153999999999998071
ENSDART00000110470	807.062	929.646	866.609	980.71	270.04	418.018	933.004	1874.1	741.649	151.506	254.658	1091.86	6	cos_per_21_ph_6	.82742787578099996626	4.6593432192416397442	.00044759999999999998356
ENSDART00000110472	12.2129	28.3156	12.4539	51.6289	28.3177	22.0412	24.8734	28.1237	16.0908	41.8931	20.3635	18.5382	12	ct12-spike	.85523881263648104945	5.2186890766928097918	.00019530999999999999858
ENSDART00000110479	2267.53	5092.92	5958.61	3292.28	975.943	3058.78	4561.3	3897.04	5056.87	2493.07	1177.57	1734.44	6	cos_per_23_ph_6	.88211067897299499929	5.9219299670606897479	.00007333199999999999517
ENSDART00000110492	775.241	1821.18	156.244	973.433	874.246	773.31	985.525	1586.84	150.378	110.911	311.791	646.126	3	ct03-spike	.84560342783163600089	5.0093192845208296404	.00026499999999999999034
ENSDART00000110500	33.9711	30.3868	38.795	45.4892	99.0114	66.2464	64.341	44.9262	55.9126	41.5974	52.4206	92.8563	18	cos_per_28_ph_18	.81531142810582502012	4.4527462584693102698	.00061494999999999995846
ENSDART00000110522	599.732	320.719	188.56	306.41	105.447	213.834	559.005	98.6463	187.861	131.013	153.953	198.734	0	ct00-spike	.90988435302988501796	6.9355763789966697885	.000020083999999999999477
ENSDART00000110542	209.091	284.341	444.901	234.246	216.254	199.388	239.403	243.218	342.214	131.219	79.5131	114.722	7	ct07-spike	.84003695886713003471	4.8963820234482202665	.00031324000000000000281
ENSDART00000110553	978.565	1096.57	1782.5	1378.7	1114.8	960.659	1330.97	1412.11	2482.2	941.719	837.295	556.376	7	ct07-spike	.84141022482117500125	4.9237378073147999302	.00030076000000000001388
ENSDART00000110560	66.4097	104.127	76.6323	153.966	153.381	150.374	83.5749	58.6213	73.071	147.73	119.84	110.523	16	ct16-box1	.88972129614059303204	6.1632428512265100551	.000053227999999999999273
ENSDART00000110578	22.8876	19.7399	22.5592	35.154	50.8962	189.23	20.5176	17.2507	16.8962	46.9607	46.548	127.713	19	ct19-spike	.94394290820244497464	9.0425036648071994705	.0000019831999999999999179
ENSDART00000110581	9212.23	7884.06	10838.1	7518.57	3682.09	3877.82	8829.69	12965.6	6345.36	1469.32	1670.65	9467.3	6	cos_per_21_ph_6	.87427986942560997896	5.6954867608485999497	.000099771000000000004105
ENSDART00000110583	467.839	407.892	626.294	417.194	410.465	310.144	366.291	474.736	691.151	255.617	282.519	383.092	7	ct07-spike	.87717671756545301243	5.7768909111682003044	.000089245000000000003579
ENSDART00000110597	45.3867	57.1751	37.0527	23.1427	31.5162	75.8922	38.9029	36.2693	53.3973	45.5317	45.3881	80.5074	20	ct20-spike	.84107056566196403136	4.9169415806336695951	.0003038100000000000067
ENSDART00000110616	371.637	651.853	873.595	393.604	450.203	256.832	349.605	528.359	736.912	348.425	168.885	463.315	7	ct07-spike	.88689397464654495806	6.0709280383327204333	.000060112999999999998575
ENSDART00000110621	354.85	778.31	102.4	492.241	386.107	332.858	438.374	977.902	152.897	100.494	239.842	323.551	3	ct03-spike	.87920072305118301959	5.8353818969636197522	.000082421000000000002508
ENSDART00000110633	609.042	642.794	94.738	558.525	583.194	518.46	527.433	546.214	134.262	245.504	447.584	469.027	21	ct21-box2	.88681489390610701573	6.0683928696851001661	.000060316000000000003238
ENSDART00000110642	364.117	730.187	1046.51	450.268	361.058	243.147	452.808	424.156	701.186	632.715	156.505	376.08	7	ct07-rigid	.81526181196727398603	4.4519381723940796292	.00061572000000000004765
ENSDART00000110665	12.8829	63.7934	27.9398	34.6314	36.4207	161.357	39.0985	27.1823	17.1888	38.8104	143.418	135.672	19	ct19-spike	.85559985753059397684	5.2269064525200699123	.00019300999999999999689
ENSDART00000110678	105.549	140.663	100.853	101.187	76.4503	63.5491	91.2906	88.1334	149.924	130.001	123.186	94.7295	6	cos_per_28_ph_6	.82389867506977199074	4.5971866704721300323	.00049218000000000004801
ENSDART00000110686	328.593	554.638	806.968	439.707	427.192	299.026	331.243	707.819	576.61	289.5	225.879	291.383	6	ct06-spike	.88881916777133196383	6.1334278497385401607	.000055353999999999998908
ENSDART00000110706	292.15	343.469	146.146	433.019	329.676	338.942	328.222	328.678	112.978	232.545	438.89	422.337	20	ct20-box2	.81936829519717202519	4.5198274323156404364	.00055431999999999996467
ENSDART00000110718	343.899	961.505	1767.81	887.218	877.074	520.046	383.49	882.157	2048.03	2107.03	551.995	352.769	9	cos_per_24_ph_9	.86581639163560497607	5.471943674762269616	.0001361599999999999974
ENSDART00000110724	43.1388	49.1385	45.6109	30.4229	19.6178	41.4827	41.2219	55.2985	22.1024	27.5295	27.4993	36.4693	4	cos_per_22_ph_4	.84852913718879696692	5.0709468668191197693	.00024208000000000001327
ENSDART00000110731	1524.92	1247.68	161.501	799.774	547.834	671.348	1172.28	898.939	521.234	55.1939	302.75	562.517	2	ct02-spike	.83643673440299104449	4.8261656658733995684	.00034788000000000000997
ENSDART00000110734	82.1021	84.6066	226.114	46.8855	23.3719	48.1547	80.6707	72.8402	130.215	96.4007	43.4894	65.114	8	ct08-spike	.83501884839453899279	4.7990894915480701854	.00036231000000000001919
ENSDART00000110740	472.293	650.153	182.123	535.908	305.903	194.335	351.583	707.434	163.227	55.2786	151.704	160.655	3	ct03-spike	.8301636402650099944	4.7087258986460200916	.00041524999999999998327
ENSDART00000110761	922.644	381.132	600.862	283.931	2441.92	194.675	520.696	516.353	1134.53	2254.09	3773.51	1204.29	15	ct15-spike	.84194220826168597593	4.9344224412560295789	.00029601999999999997456
ENSDART00000110830	72.9367	121.328	159.76	196.244	80.7318	91.2182	129.577	131.955	113.141	283.115	85.6836	138.028	11	ct11-spike	.8581735397712050295	5.2863188208743903118	.00017720999999999999231
ENSDART00000110857	135.687	78.2808	252.293	313.219	413.154	176.4	48.1877	81.7031	53.0592	415.844	312.802	275.914	14	cos_per_25_ph_14	.88909253164716395279	6.1424262491897803073	.000054703000000000001244
ENSDART00000110878	25.2818	36.8918	58.9692	69.4198	44.8104	30.7947	17.9087	39.4133	81.0418	52.7087	32.8376	39.384	11	cos_per_22_ph_11	.89710425284625294751	6.420939888775159865	.00003812700000000000274
ENSDART00000110886	97.1448	56.4037	22.144	23.8601	272.851	17.3607	37.6594	29.2519	46.1138	61.881	114.656	42.4447	16	ct16-spike	.82506136666671403557	4.6174760464216095812	.00047712999999999998035
ENSDART00000110962	27.7981	41.8189	92.1724	23.2801	20.3379	20.3441	28.2367	24.459	45.4954	29.1047	26.0536	20.9332	7	ct07-spike	.8292978875270829997	4.6929820690401502503	.00042528999999999998879
ENSDART00000110972	190.832	311.568	316.059	651.101	1068.64	899.759	154.004	151.311	275.924	337.173	896.92	321.914	17	ct17-spike	.82355305854619798023	4.5911905201504898955	.00049671999999999997405
ENSDART00000110975	9887.46	6729.21	9652.61	6012.06	5401.72	7515.64	8065.34	8871.15	8589.82	7681	3440.78	8543.39	3	ct03-box2	.84312018698089796764	4.9582580813244900853	.00028574999999999997971
ENSDART00000111058	5642.86	599.009	359.547	115.467	22705.8	303.207	535.031	698.415	419.944	175.996	18804.3	71.321	16	ct16-spike	.97576132539610904715	14.100091354330000826	.000000031633000000000002743
ENSDART00000111088	319.235	489.899	768.561	391.232	376.985	354.416	366.233	427.879	617.132	416.293	174.868	186.866	7	ct07-spike	.86837556147927996708	5.5374171046072797608	.00012421000000000000508
ENSDART00000111099	1053.02	1002.62	1489.79	1100.23	1080.64	943.459	1215.96	1149.51	1873.04	1269.17	944.162	569.287	8	ct08-rigid	.82437762482787202423	4.605522452739999828	.00048592999999999997741
ENSDART00000111161	852.502	1187.5	1514.51	800.789	525.968	928.115	882.948	996.111	1346.19	414.116	584.957	887.691	7	ct07-spike	.84633654369619004676	5.0246100428828803786	.00025911000000000000438
ENSDART00000111163	570.419	469.341	799.684	691.43	596.208	530.012	626.309	606.377	967.406	641.895	501.331	550.301	9	ct09-spike	.91099806132510496859	6.9853407499803301661	.000018910000000000000214
ENSDART00000111169	195.537	123.271	46.6805	42.1071	128.252	198.414	192.109	86.5105	37.1186	73.386	65.6903	86.4747	23	cos_per_26_ph_23	.85962941969545503262	5.3205927517953703898	.00016872999999999999218
ENSDART00000111211	869.553	954.247	121.182	645.085	371.724	402.328	787.352	654.727	146.93	66.4265	221.667	338.575	2	ct02-spike	.84366532712926700643	4.9693719262170601425	.00028109000000000000739
ENSDART00000111214	764.869	762.37	1405.88	815.936	739.131	866.851	949.205	1123.08	1501.7	1073.56	514.932	921.095	9	ct09-spike	.82835898586849998626	4.6760302986272597181	.00043637999999999999273
ENSDART00000111227	12.6918	32.7393	15.6517	13.1073	67.6917	54.3803	28.0514	51.5029	30.1404	39.3488	89.5169	25.2506	17	ct17-spike	.81774900173391995573	4.4928105644607603253	.00057793999999999998585
ENSDART00000111256	104.07	116.467	58.5147	55.8737	707.67	69.5008	59.62	73.0608	137.632	90.6368	514.318	587.929	17	ct17-spike	.85740177842825504584	5.2683473009147796517	.00018184000000000000727
ENSDART00000111273	2445.08	3589.43	5434.31	2017.64	1476.37	1837.25	2690.03	6790.25	5891.71	4214.37	1857.27	2525.16	7	cos_per_23_ph_7	.84498275037144499056	4.9964514828138497649	.00027008000000000001624
ENSDART00000111287	406.38	947.443	208.95	450.643	330.841	358.985	551.097	573.043	117.2	216.915	323.085	236.677	3	ct03-spike	.83984962565055698569	4.8926752384414200492	.00031496999999999997439
ENSDART00000111303	172.728	127.373	44.994	185.437	205.387	244.929	89.1406	123.776	66.2632	167.002	203.194	133.195	18	cos_per_21_ph_18	.82080035470849499468	4.5439945095078604353	.00053406000000000004684
ENSDART00000111334	784.912	731.66	460.142	553.811	374.095	427.543	747.616	425.604	427.269	265.979	324.068	442.255	1	ct01-spike	.81887325210560402144	4.511533354241620053	.0005614599999999999539
ENSDART00000111338	1143.93	1134.23	306.037	747.875	365.977	816.2	890.207	684.524	193.782	49.6279	283.928	705.005	0	ct00-box1	.81869914145130096017	4.5086235349678895901	.00056398999999999999914
ENSDART00000111375	185.905	216.143	294.666	161.719	144.96	108.62	86.193	210.591	286.656	216.909	65.9866	89.3037	7	cos_per_25_ph_7	.89157195735004501902	6.2254988566601703326	.000049067000000000003028
ENSDART00000111394	143.205	70.4587	39.1968	103.799	105.33	155.729	131.15	112.232	77.0914	42.2593	107.252	137.186	21	cos_per_26_ph_21	.90996567333126898713	6.939180241774669966	.000019995999999999999641
ENSDART00000111395	92.2432	31.9549	49.2969	41.9476	61.2203	130.597	166.309	170.402	62.1919	48.4153	52.8756	41.8376	23	cos_per_28_ph_23	.82244254901451596673	4.5720313155688998563	.00051152999999999994914
ENSDART00000111400	136.967	180.837	28.7136	93.948	62.7617	83.3722	153.783	166.931	104.504	77.9847	97.514	113.272	2	ct02-spike	.84826407841372297725	5.0652963749755697265	.0002440900000000000025
ENSDART00000111409	314.035	229.667	503.473	301.071	282.624	244.346	315.432	459.394	643.847	421.346	244.414	212.07	9	ct09-spike	.82401066915402099156	4.5991330937509395937	.00049070999999999999602
ENSDART00000111436	343.956	177.208	518.041	436.327	581.694	295.994	394.454	472.001	768.106	529.809	248.819	328.504	12	cos_per_20_ph_12	.82260037916354400434	4.5747443935751501698	.00050940999999999996267
ENSDART00000111457	124.24	95.9758	47.6602	81.9407	80.2406	114.247	87.6391	55.1259	59.5736	82.2383	114.994	72.4276	20	cos_per_20_ph_20	.88260167461214800166	5.9368294889627604149	.000071878999999999994004
ENSDART00000111484	479.491	381.864	636.441	293.996	200.963	259.173	369.77	365.519	492.485	254.897	110.253	187.288	5	ct05-box1	.85444093393534903402	5.2006294778436403803	.00020047000000000001017
ENSDART00000111542	476.368	392.707	368.939	263.547	271.369	416.15	390.648	349.994	405.611	229.144	260.005	244.832	0	cos_per_27_ph_0	.81592288769117804481	4.462729032617409608	.00060550000000000002692
ENSDART00000111553	118.076	89.2743	16.772	79.5494	205.772	90.598	56.4871	60.9727	38.744	166.95	163.273	69.1342	17	cos_per_21_ph_17	.84315066234065294548	4.9588779870632704316	.00028549000000000000592
ENSDART00000111610	7641.62	7976.02	4861.94	4528.08	2653.91	3982.77	8921	7092.72	3323.54	504.247	2474.11	2752.34	2	ct02-spike	.89446679610864898713	6.3259559445176201109	.000043072999999999999092
ENSDART00000111622	294.077	291.704	463.813	393.211	252.153	255.934	243.307	279.715	524.048	454.546	193	367.074	10	ct10-spike	.88298300007451402394	5.9484616078331598032	.000070766999999999995164
ENSDART00000111629	205.358	186.348	530.083	307.852	327.322	211.188	212.718	297.98	439.582	263.98	110.307	192.695	9	ct09-spike	.86674105397239098458	5.4953978745176499388	.00013174000000000000922
ENSDART00000111641	28.5941	54.018	30.1197	25.0914	9.6205	18.3933	40.4138	27.1756	22.4852	18.4583	18.1097	55.8327	5	cos_per_20_ph_5	.82235073331856800571	4.5704545184241496258	.0005127699999999999576
ENSDART00000111684	99.692	55.6754	206.407	115.822	83.0291	93.7587	74.4711	89.1863	139.468	102.648	37.2574	76.9845	9	ct09-spike	.86061525943118299953	5.3440822966731102994	.00016316999999999999798
ENSDART00000111729	387.115	519.89	831.097	565.426	427.16	251.867	324.969	509.28	667.011	588.827	232.174	409.737	9	cos_per_22_ph_9	.88659644437935503092	6.061402778461330243	.000060877000000000000069
ENSDART00000111740	369.176	468.731	565.901	307.062	269.053	290.951	268.531	291.723	609.436	178.273	163.184	342.305	7	ct07-spike	.8669606386941669518	5.5010009986286902972	.00013071000000000000045
ENSDART00000111750	269.341	334.466	78.1978	249.783	229.899	319.882	287.594	297.674	114.362	181.278	211.971	229.847	21	ct21-box2	.86334203742556103744	5.4102723297705201944	.00014852999999999998908
ENSDART00000111797	1121.98	1701.4	332.778	1273.82	582.743	1440.01	1585.6	1133.05	344.899	234.258	655.811	1752.66	0	ct00-box1	.82488291269590596766	4.6143501027689000082	.00047941999999999998722
ENSDART00000111820	302.716	235.957	642.764	214.006	472.697	299.892	246.627	301.759	517.224	215.141	274.329	379.44	8	ct08-spike	.82080529467070595384	4.5440783265845503536	.00053399000000000002887
ENSDART00000111854	52.8239	347.525	83.471	53.3675	105.418	113.403	92.5264	299.064	148.513	29.425	106.986	121.331	4	ct04-spike	.93445098211611898886	8.2984038344695392198	.000004265799999999999883
ENSDART00000111882	1341.32	1146.13	1451.85	1352.93	422.61	951.293	1197.18	1864.57	1420.76	217.037	232.541	1509.62	6	cos_per_21_ph_6	.81183332231386495792	4.3967967846528601683	.00067088000000000000064
ENSDART00000111905	50.4457	94.2173	59.6351	85.1205	156.368	245.181	111.225	57.7175	67.403	79.0709	168.697	126.995	18	ct18-spike	.84266110534467097981	4.948939752474280418	.00028971999999999998405
ENSDART00000111917	370.796	423.661	438.168	272.682	231.972	170.323	308.205	319.491	416.215	143.594	117.33	301.481	5	cos_per_23_ph_5	.83415856378598396415	4.7828157283183596604	.00037128999999999997726
ENSDART00000111926	260.363	370.803	373.756	274.646	262.357	233.97	228.59	361.209	436.953	302.645	185.656	332.65	6	ct06-spike	.83611367668345104587	4.8199683729372599927	.00035113000000000000765
ENSDART00000111950	1074.34	926.318	958.119	651.578	564.316	695.204	741.41	824.831	1074.85	282.571	549.543	355.773	4	ct04-box1	.83670240491202396704	4.8312746322771396024	.00034523000000000002687
ENSDART00000111966	1848.41	836.216	163.617	743.08	319.065	414.707	954.116	805.122	263.641	120.178	323.374	264.065	1	ct01-spike	.85949914504544500105	5.3175058216069199801	.00016948000000000001041
ENSDART00000111980	807.991	3510.12	1093.35	957.095	409.714	712.52	1090.93	1979.98	1021.05	104.483	54.581	680.696	5	ct05-spike	.8714183749584130112	5.6176129537607399911	.00011110000000000000355
ENSDART00000112002	224.894	90.3584	39.6219	54.2304	1434.94	111.654	244.544	134.69	47.2773	86.223	465.71	42.4736	16	ct16-spike	.83375828019020004067	4.7752828900909403131	.0003755200000000000096
ENSDART00000112005	63.2058	210.208	44.0768	77.2216	76.6678	66.9141	84.0617	131.268	55.0279	57.0392	69.2434	109.663	4	ct04-spike	.85652774828512601157	5.2481562616816397338	.00018719000000000000179
ENSDART00000112010	114.766	176.963	268.771	178.11	117.758	94.971	135.097	175.774	232.539	155.69	137.031	182.643	7	ct07-spike	.85561986157177194467	5.2273625749461896106	.00019288000000000000999
ENSDART00000112014	520.242	602.644	785.949	555.515	420.498	449.272	630.51	592.987	677.243	217.999	242.484	519.846	7	cos_per_21_ph_7	.84217402039701705352	4.9390937151290703611	.00029398000000000000086
ENSDART00000112017	471.613	376.697	344.322	344.287	131.02	196.696	438.333	402.274	676.768	288.716	118.616	63.1458	3	cos_per_27_ph_3	.84283294709012002155	4.9524233812518403397	.00028822999999999999662
ENSDART00000112034	13.9606	40.6096	22.608	56.9268	18.4943	14.3089	14.8644	33.4277	23.5667	84.0924	19.9804	33.7142	12	ct12-spike	.87246419393344998294	5.645790855274279707	.00010684999999999999511
ENSDART00000112105	2943.33	1987.6	1685.37	1670.73	349.99	1702.4	2646.95	2569.55	3029.83	754.496	837.267	1981.35	2	cos_per_25_ph_2	.82237257013484199586	4.5708294330470904399	.00051248000000000005355
ENSDART00000112151	1498	1502.59	2550.2	1750.54	1685.07	1066.79	1461.93	1630.37	2561.83	3351.94	1798.72	281.252	9	cos_per_25_ph_9	.81331253819084703416	4.4204202496896103369	.00064663000000000003462
ENSDART00000112204	925.507	482.022	260.955	460.937	664.907	843.938	1106.08	531.468	440.542	156.338	327.748	549.284	23	cos_per_27_ph_23	.9173889997022750542	7.2891933804604898128	.000013172000000000000264
ENSDART00000112211	607.367	197.903	258.86	741.239	239.5	1369.35	349.589	259.877	189.072	296.342	81.0759	1117.96	21	ct21-spike	.89504550369069602045	6.3465070891028299016	.000041946999999999996659
ENSDART00000112282	949.431	875.844	867.884	577.016	260.603	217.309	664.272	697.803	504.19	449.104	140.219	407.821	4	cos_per_24_ph_4	.8413339733221529837	4.9222103583922995895	.00030143999999999998704
ENSDART00000112285	74.5378	95.2642	20.3178	15.2755	178.856	38.1249	30.1276	61.4191	12.7239	47.2205	189.762	60.2049	16	ct16-spike	.90882514469295394566	6.8890560662356801203	.000021254000000000000133
ENSDART00000112288	779.774	953.622	219.559	834.262	1017.6	982.247	844.508	1318.7	261.278	65.5996	867.064	946.166	22	ct22-box2	.81196537277918801045	4.3988954993782396485	.0006686899999999999962
[truncated: 176 more rows]

## Sheet: JTK_Cycle_DART
Probeset	BH.Q	ADJ.P	PER	LAG	AMP	Probeset	0	4	8	12	16	20	24	28	32	36	40	44
ENSDART00000087202	0.326217	9.57e-05	24	6	1578.73	ENSDART00000087202	2339.74	4047.94	3984	1785.05	656.39	1235.73	2582.93	2768.98	2574.03	2163.33	542.249	1669.31
ENSDART00000067282	0.326217	9.57e-05	24	8	976.265	ENSDART00000067282	849.733	1845.89	2655.59	970.598	229.653	210.03	1168.58	2220.99	2812.54	1358.3	226.461	117.394
ENSDART00000053681	0.326217	9.57e-05	28	14	487.796	ENSDART00000053681	259.086	521.163	687.237	2274.61	1029.12	639.567	330.2	489.446	575.266	584.61	2256.72	785.699
ENSDART00000082434	0.326217	9.57e-05	24	12	399.857	ENSDART00000082434	368.201	482.974	1048.46	1280.43	914.135	739.647	350.731	844.012	1056.94	1297.07	890.057	528.8
ENSDART00000032459	0.326217	9.57e-05	28	4	200.684	ENSDART00000032459	547.112	864.05	601.651	417.541	317.841	174.394	505.479	776.981	849.961	430.926	260.067	78.5783
[truncated: 1,186 more rows]

## Sheet: HAY_JTK_DART
f1	d1	d2	d3	d4	d5	d6	d7	d8	d9	d10	d11	d12	Phase_haystack	BESTMODEL_haystack	Shape_haystack	CORREL_haystack	TSTAT_haystack	TPROB_haystack	BH.Q_JTK_Cycle	ADJ.P_JTK_Cycle	PER_JTK_Cycle	Phase_JTK_Cycle	AMP_JTK_Cycle	Predictor_group
[truncated: 2,606 more rows]

[truncated: 4 more sheets: HAY_JTK_Merged_DARG, HAY_JTK_MUSG, Unique_MUSG, Danio_vs_Mus_phase]
