# Supplementary material for: Comparative Analysis of Vertebrate Diurnal/Circadian Transcriptomes
Source: PLoS One. 2017 Jan 11;12(1):e0169923. doi: 10.1371/journal.pone.0169923 (PMC5226840; doi:10.1371/journal.pone.0169923)
Supplement: S2 Table — (XLSX) [file pone.0169923.s004.xlsx]

## Sheet: Mus_TF
Ensembl Gene ID		TF	Associated Gene Name
ENSMUSG00000000037	IPR004092	Mbt	Scml2
ENSMUSG00000000078	IPR007087, IPR015880	Znf_C2H2, Znf_C2H2-like	Klf6
ENSMUSG00000000085	IPR004092	Mbt	Scmh1
ENSMUSG00000000093	IPR001699, IPR002070, IPR008967	TF_T-box, TF_Brachyury, p53-like_TF_DNA-bd	Tbx2
ENSMUSG00000000094	IPR001699, IPR008967	TF_T-box, p53-like_TF_DNA-bd	Tbx4
ENSMUSG00000000103	IPR006794, IPR007087, IPR015880	Transcrp_activ_Zfx/Zfy-dom, Znf_C2H2, Znf_C2H2-like	Zfy2
ENSMUSG00000000134	IPR011598	bHLH_dom	Tfe3
ENSMUSG00000000202	IPR013069	BTB_POZ	Btbd17
ENSMUSG00000000247	IPR001356, IPR009057	Homeobox_dom, Homeodomain-like	Lhx2
ENSMUSG00000000282	IPR011598	bHLH_dom	Mnt
ENSMUSG00000000317	IPR007087, IPR013069, IPR015880	Znf_C2H2, BTB_POZ, Znf_C2H2-like	Bcl6b
ENSMUSG00000000399	IPR008030	NmrA-like	Ndufa9
ENSMUSG00000000435	IPR002546, IPR011598	Basic, bHLH_dom	Myf5
ENSMUSG00000000439	IPR000571	Znf_CCCH	Mkrn2
ENSMUSG00000000440	IPR000536, IPR001628, IPR001723, IPR003074, IPR003077, IPR008946	Nucl_hrmn_rcpt_lig-bd_core, Znf_hrmn_rcpt, Str_hrmn_rcpt, 1Cnucl_rcpt, 1Cnucl_rcpt_G, Nucl_hormone_rcpt_ligand-bd	Pparg
ENSMUSG00000000552	IPR007087, IPR015880	Znf_C2H2, Znf_C2H2-like	Zfp385a
ENSMUSG00000000567	IPR009071	HMG_box_dom	Sox9
ENSMUSG00000000690	IPR001356, IPR001827, IPR009057	Homeobox_dom, Homeobox_Antennapedia_CS, Homeodomain-like	Hoxb6
ENSMUSG00000000708	IPR000182, IPR009464, IPR016376	GNAT_dom, PCAF_N, Hist_acetylase_PCAF	Kat2b
ENSMUSG00000000731	IPR000770, IPR001965, IPR008087, IPR010919	SAND_dom, Znf_PHD, AIRE, SAND_dom-like	Aire
ENSMUSG00000000776	IPR007811	RPC4	Polr3d
ENSMUSG00000000782	IPR009071, IPR013558	HMG_box_dom, CTNNB1-bd_N	Tcf7
ENSMUSG00000000823	IPR007087, IPR015880	Znf_C2H2, Znf_C2H2-like	Znf512b
ENSMUSG00000000861	IPR007087, IPR015880	Znf_C2H2, Znf_C2H2-like	Bcl11a
ENSMUSG00000000902	IPR006939, IPR017393	SNF5, SWI_SNF_chromatin_remodel_cplx	Smarcb1
ENSMUSG00000000938	IPR001356, IPR009057	Homeobox_dom, Homeodomain-like	Hoxa10
ENSMUSG00000000942	IPR001356, IPR001827, IPR009057	Homeobox_dom, Homeobox_Antennapedia_CS, Homeodomain-like	Hoxa4
ENSMUSG00000001065	IPR007087, IPR015880	Znf_C2H2, Znf_C2H2-like	Zfp276
ENSMUSG00000001103	IPR001356, IPR009057	Homeobox_dom, Homeodomain-like	Sebox
ENSMUSG00000001156	IPR011598	bHLH_dom	Mxd1
ENSMUSG00000001157	IPR013069	BTB_POZ	Gmcl1
ENSMUSG00000001228	IPR001965, IPR003105	Znf_PHD, SRA_YDG	Uhrf1
ENSMUSG00000001280	IPR007087, IPR015880	Znf_C2H2, Znf_C2H2-like	Sp1
ENSMUSG00000001288	IPR000536, IPR001628, IPR001723, IPR003078, IPR008946	Nucl_hrmn_rcpt_lig-bd_core, Znf_hrmn_rcpt, Str_hrmn_rcpt, Retinoic_acid_rcpt, Nucl_hormone_rcpt_ligand-bd	Rarg
ENSMUSG00000001419	IPR002100	TF_MADSbox	Mef2d
ENSMUSG00000001444	IPR001699, IPR008967	TF_T-box, p53-like_TF_DNA-bd	Tbx21
ENSMUSG00000001493	IPR001356, IPR009057	Homeobox_dom, Homeodomain-like	Meox1
ENSMUSG00000001496	IPR001356, IPR009057	Homeobox_dom, Homeodomain-like	Nkx2-1
ENSMUSG00000001497	IPR001523, IPR009057	Paired_dom, Homeodomain-like	Pax9
ENSMUSG00000001504	IPR001356, IPR003893, IPR008422, IPR009057	Homeobox_dom, Iroquois_homeo, Homeobox_KN_domain, Homeodomain-like	Irx2
ENSMUSG00000001510	IPR000047, IPR001356, IPR009057	HTH_motif, Homeobox_dom, Homeodomain-like	Dlx3
ENSMUSG00000001517	IPR001766	TF_fork_head	Foxm1
ENSMUSG00000001521	IPR000007	Tubby_C	Tulp3
ENSMUSG00000001524	IPR004598	TFIIH_p52/Tfb2	Gtf2h4
ENSMUSG00000001558	IPR013069	BTB_POZ	Klhl10
ENSMUSG00000001566	IPR001356, IPR009057	Homeobox_dom, Homeodomain-like	Mnx1
ENSMUSG00000001604	IPR001222, IPR006289, IPR016492	Znf_TFIIS, TFSII, TF_IIS-rel	Tcea3
ENSMUSG00000001632	IPR001965, IPR007087	Znf_PHD, Znf_C2H2	Brpf1
ENSMUSG00000001655	IPR001356, IPR009057	Homeobox_dom, Homeodomain-like	Hoxc13
ENSMUSG00000001656	IPR001356, IPR009057	Homeobox_dom, Homeodomain-like	Hoxc11
ENSMUSG00000001657	IPR000047, IPR001356, IPR001827, IPR009057	HTH_motif, Homeobox_dom, Homeobox_Antennapedia_CS, Homeodomain-like	Hoxc8
ENSMUSG00000001661	IPR001356, IPR001827, IPR009057	Homeobox_dom, Homeobox_Antennapedia_CS, Homeodomain-like	Hoxc6
ENSMUSG00000001815	IPR001356, IPR009057	Homeobox_dom, Homeodomain-like	Evx2
ENSMUSG00000001819	IPR001356, IPR009057	Homeobox_dom, Homeodomain-like	Hoxd13
ENSMUSG00000001823	IPR001356, IPR009057	Homeobox_dom, Homeodomain-like	Hoxd12
ENSMUSG00000001844	IPR001594	Znf_DHHC_palmitoyltrfase	Zdhhc4
ENSMUSG00000001909	IPR000571	Znf_CCCH	Trmt1
ENSMUSG00000001910	IPR013069	BTB_POZ	Nacc1
ENSMUSG00000001911	IPR000647, IPR003619	CTF/NFI, MAD_homology1_Dwarfin-type	Nfix
ENSMUSG00000001988	IPR011598	bHLH_dom	Npas1
ENSMUSG00000002028	IPR001214, IPR001965, IPR002857, IPR003616, IPR003888, IPR003889, IPR016569	SET_dom, Znf_PHD, Znf_CXXC, Post-SET_dom, FYrich_N, FYrich_C, MeTrfase_trithorax	Kmt2a
ENSMUSG00000002052	IPR017072	TF_Spt6	Supt6
ENSMUSG00000002057	IPR001766	TF_fork_head	Foxn1
ENSMUSG00000002108	IPR000536, IPR001628, IPR001723, IPR008946	Nucl_hrmn_rcpt_lig-bd_core, Znf_hrmn_rcpt, Str_hrmn_rcpt, Nucl_hormone_rcpt_ligand-bd	Nr1h3
ENSMUSG00000002111	IPR000418	Ets_dom	Spi1
ENSMUSG00000002147	IPR008967, IPR013801, IPR015988	p53-like_TF_DNA-bd, STAT_TF_DNA-bd, STAT_TF_coiled-coil	Stat6
ENSMUSG00000002249	IPR000818, IPR016361	TEA/ATTS, TEF_metazoa	Tead3
ENSMUSG00000002250	IPR000536, IPR001628, IPR001723, IPR003074, IPR003075, IPR008946	Nucl_hrmn_rcpt_lig-bd_core, Znf_hrmn_rcpt, Str_hrmn_rcpt, 1Cnucl_rcpt, 1Cnucl_rcpt_B, Nucl_hormone_rcpt_ligand-bd	Ppard
ENSMUSG00000002265	IPR007087, IPR015880	Znf_C2H2, Znf_C2H2-like	Peg3
ENSMUSG00000002266	IPR001909, IPR007087, IPR015880	Krueppel-associated_box, Znf_C2H2, Znf_C2H2-like	Zim1
ENSMUSG00000002307	IPR005012	Daxx	Daxx
ENSMUSG00000002325	IPR001346, IPR008984	Interferon_reg_fact_DNA-bd_dom, SMAD_FHA_domain	Irf9
ENSMUSG00000002345	IPR002100	TF_MADSbox	2310045N01Rik
ENSMUSG00000002393	IPR000536, IPR001628, IPR001723, IPR003068, IPR008946	Nucl_hrmn_rcpt_lig-bd_core, Znf_hrmn_rcpt, Str_hrmn_rcpt, COUP_TF, Nucl_hormone_rcpt_ligand-bd	Nr2f6
ENSMUSG00000002428	IPR000330	SNF2_N	Hltf
ENSMUSG00000002486	IPR001289	TF_CBFB	Tchp
ENSMUSG00000002578	IPR007087, IPR015880	Znf_C2H2, Znf_C2H2-like	Ikzf4
ENSMUSG00000002617	IPR001909, IPR007087, IPR015880	Krueppel-associated_box, Znf_C2H2, Znf_C2H2-like	Zfp40
ENSMUSG00000002658	IPR008851	TFIIF-alpha	Gtf2f1
ENSMUSG00000002679	IPR007018	Mediator_Med6	Med6
ENSMUSG00000002728	IPR000182	GNAT_dom	Naa20
ENSMUSG00000002748	IPR001965, IPR013136	Znf_PHD, WSTF_Acf1_Cbp146	Baz1b
ENSMUSG00000002803	IPR013069	BTB_POZ	Btbd6
ENSMUSG00000002814	IPR010666	Znf_GRF	Top3a
ENSMUSG00000002963	IPR008984	SMAD_FHA_domain	Pnkp
ENSMUSG00000002983	IPR000451, IPR002909, IPR008967, IPR011539	NFkB/Dor, IPT, p53-like_TF_DNA-bd, RHD	Relb
ENSMUSG00000002996	IPR009071, IPR013723	HMG_box_dom, Ataxin-1_HBP1	Hbp1
ENSMUSG00000003032	IPR007087, IPR015880	Znf_C2H2, Znf_C2H2-like	Klf4
ENSMUSG00000003038	IPR000079	HMGN_fam	Hmgn2
ENSMUSG00000003051	IPR000418, IPR003118	Ets_dom, Pointed_dom	Elf3
ENSMUSG00000003154	IPR001766	TF_fork_head	Foxj2
ENSMUSG00000003184	IPR001346, IPR008984	Interferon_reg_fact_DNA-bd_dom, SMAD_FHA_domain	Irf3
ENSMUSG00000003198	IPR001909, IPR007087, IPR015880	Krueppel-associated_box, Znf_C2H2, Znf_C2H2-like	Zfp959
ENSMUSG00000003282	IPR007087, IPR015880	Znf_C2H2, Znf_C2H2-like	Plag1
ENSMUSG00000003308	IPR013069	BTB_POZ	Keap1
ENSMUSG00000003344	IPR013069	BTB_POZ	Btbd2
ENSMUSG00000003382	IPR000418	Ets_dom	Etv3
ENSMUSG00000003435	IPR005100, IPR017071	TF_Spt5_NGN-domain, TF_Spt5	Supt5
ENSMUSG00000003477	IPR000940	NNMT_TEMT_trans	Inmt
ENSMUSG00000003545	IPR000837, IPR004827	AP-1, bZIP	Fosb
ENSMUSG00000003680	IPR004823	TAF_TATA-bd	Taf6l
ENSMUSG00000003808	IPR013196	HTH_11	Farsa
ENSMUSG00000003847	IPR002909, IPR008366, IPR008967, IPR011539	IPT, NFAT, p53-like_TF_DNA-bd, RHD	Nfat5
ENSMUSG00000003923	IPR009071	HMG_box_dom	Tfam
ENSMUSG00000003929	IPR001909, IPR007087, IPR015880	Krueppel-associated_box, Znf_C2H2, Znf_C2H2-like	Zfp81
ENSMUSG00000003949	IPR004827	bZIP	Hlf
ENSMUSG00000003992	IPR008116	SSDP_DNA-bd	Ssbp2
ENSMUSG00000004040	IPR008967, IPR013801, IPR015988	p53-like_TF_DNA-bd, STAT_TF_DNA-bd, STAT_TF_coiled-coil	Stat3
ENSMUSG00000004043	IPR008967, IPR013801, IPR015988	p53-like_TF_DNA-bd, STAT_TF_DNA-bd, STAT_TF_coiled-coil	Stat5a
ENSMUSG00000004099	IPR001025, IPR001525, IPR002857	BAH_dom, C5_MeTfrase, Znf_CXXC	Dnmt1
ENSMUSG00000004151	IPR000418, IPR006715	Ets_dom, ETS_PEA3_N	Etv1
ENSMUSG00000004231	IPR001523, IPR009057	Paired_dom, Homeodomain-like	Pax2
ENSMUSG00000004328	IPR011598	bHLH_dom	Hif3a
ENSMUSG00000004359	IPR000418	Ets_dom	Spic
ENSMUSG00000004500	IPR001909, IPR007087, IPR015880	Krueppel-associated_box, Znf_C2H2, Znf_C2H2-like	Zfp324
ENSMUSG00000004661	IPR001606	ARID_dom	Arid3b
ENSMUSG00000004667	IPR000783, IPR005571	RNA_pol_subH/Rpb5_C, RNA_pol_Rpb5_N	Polr2e
ENSMUSG00000004842	IPR000327, IPR001356, IPR009057, IPR010982, IPR013847	POU_specific, Homeobox_dom, Homeodomain-like, Lambda_DNA-bd_dom, POU	Pou1f1
ENSMUSG00000004872	IPR001356, IPR001523, IPR009057	Homeobox_dom, Paired_dom, Homeodomain-like	Pax3
ENSMUSG00000004934	IPR004181	Znf_MIZ	Pias4
ENSMUSG00000005045	IPR000330, IPR000953, IPR001965, IPR012957, IPR012958, IPR016197	SNF2_N, Chromo/shadow_dom, Znf_PHD, CHD_C2, CHD_N, Chromodomain-like	Chd5
ENSMUSG00000005148	IPR007087, IPR015880	Znf_C2H2, Znf_C2H2-like	Klf5
ENSMUSG00000005198	IPR000684, IPR000722, IPR006592, IPR007066, IPR007073, IPR007075, IPR007080, IPR007081, IPR007083	RNA_pol_II_repeat_euk, RNA_pol_asu, RNA_pol_N, RNA_pol_Rpb1_3, RNA_pol_Rpb1_7, RNA_pol_Rpb1_6, RNA_pol_Rpb1_1, RNA_pol_Rpb1_5, RNA_pol_Rpb1_4	Polr2a
ENSMUSG00000005267	IPR001909, IPR003309, IPR007087, IPR015880	Krueppel-associated_box, Tscrpt_reg_SCAN, Znf_C2H2, Znf_C2H2-like	Zfp287
ENSMUSG00000005373	IPR011598	bHLH_dom	Mlxipl
ENSMUSG00000005442	IPR009071	HMG_box_dom	Cic
ENSMUSG00000005470	IPR006818	Histone_chaperone_ASF1-like	Asf1b
ENSMUSG00000005503	IPR001356, IPR009057	Homeobox_dom, Homeodomain-like	Evx1
ENSMUSG00000005505	IPR013069	BTB_POZ	Kbtbd4
ENSMUSG00000005566	IPR001965	Znf_PHD	Trim28
ENSMUSG00000005583	IPR002100	TF_MADSbox	Mef2c
ENSMUSG00000005621	IPR007087, IPR015880	Znf_C2H2, Znf_C2H2-like	Zfp592
ENSMUSG00000005677	IPR000536, IPR001628, IPR001723, IPR001728, IPR008946	Nucl_hrmn_rcpt_lig-bd_core, Znf_hrmn_rcpt, Str_hrmn_rcpt, ThyrH_rcpt, Nucl_hormone_rcpt_ligand-bd	Nr1i3
ENSMUSG00000005698	IPR007087, IPR015880	Znf_C2H2, Znf_C2H2-like	Ctcf
ENSMUSG00000005718	IPR011598	bHLH_dom	Tfap4
ENSMUSG00000005774	IPR003150	DNA-bd_RFX	Rfx5
ENSMUSG00000005836	IPR000679, IPR008013	Znf_GATA, GATA_N	Gata6
ENSMUSG00000005886	IPR009110, IPR011598, IPR014920, IPR017426	Nuc_rcpt_coact, bHLH_dom, Nuc_rcpt_coact_Ncoa-typ, Nuclear_rcpt_coactivator	Ncoa2
ENSMUSG00000005893	IPR000536, IPR001628, IPR001723, IPR008946	Nucl_hrmn_rcpt_lig-bd_core, Znf_hrmn_rcpt, Str_hrmn_rcpt, Nucl_hormone_rcpt_ligand-bd	Nr2c2
ENSMUSG00000005897	IPR000536, IPR001628, IPR001723, IPR008946	Nucl_hrmn_rcpt_lig-bd_core, Znf_hrmn_rcpt, Str_hrmn_rcpt, Nucl_hormone_rcpt_ligand-bd	Nr2c1
ENSMUSG00000005917	IPR001356, IPR003025, IPR003026, IPR009057, IPR013851	Homeobox_dom, Otx_TF, Otx1_TF, Homeodomain-like, Otx_TF_C	Otx1
ENSMUSG00000005982	IPR000182	GNAT_dom	Naa60
ENSMUSG00000006200	IPR001356, IPR009057	Homeobox_dom, Homeodomain-like	Rhox6
ENSMUSG00000006215	IPR007087, IPR013069, IPR015880	Znf_C2H2, BTB_POZ, Znf_C2H2-like	Zbtb17
ENSMUSG00000006270	IPR000047, IPR001356, IPR009057	HTH_motif, Homeobox_dom, Homeodomain-like	Vax1
ENSMUSG00000006307	IPR001214, IPR001965, IPR002857, IPR003616, IPR003888, IPR003889	SET_dom, Znf_PHD, Znf_CXXC, Post-SET_dom, FYrich_N, FYrich_C	Kmt2b
ENSMUSG00000006310	IPR007087, IPR013069, IPR015880	Znf_C2H2, BTB_POZ, Znf_C2H2-like	Zbtb32
ENSMUSG00000006311	IPR000418	Ets_dom	Etv2
ENSMUSG00000006362	IPR003894, IPR013289	TAFH_NHR1, ETO	Cbfa2t3
ENSMUSG00000006418	IPR015880	Znf_C2H2-like	Rnf114
ENSMUSG00000006463	IPR001594	Znf_DHHC_palmitoyltrfase	Zdhhc24
ENSMUSG00000006527	IPR004092	Mbt	Sfmbt1
ENSMUSG00000006586	IPR003894, IPR013289	TAFH_NHR1, ETO	Runx1t1
ENSMUSG00000006587	IPR007087, IPR015880	Znf_C2H2, Znf_C2H2-like	Snai3
ENSMUSG00000006642	IPR011598	bHLH_dom	Tcf23
ENSMUSG00000006678	IPR015088	Znf_DNA-dir_DNA_pol_B_alpha	Pola1
ENSMUSG00000006705	IPR001356, IPR008422, IPR009057	Homeobox_dom, Homeobox_KN_domain, Homeodomain-like	Pknox1
ENSMUSG00000006720	IPR001909, IPR007087, IPR015880	Krueppel-associated_box, Znf_C2H2, Znf_C2H2-like	Zfp184
ENSMUSG00000006920	IPR001005, IPR001214	SANT/Myb, SET_dom	Ezh1
ENSMUSG00000007216	IPR007087, IPR015880	Znf_C2H2, Znf_C2H2-like	Zfp775
ENSMUSG00000007415	IPR000679	Znf_GATA	Gatad1
ENSMUSG00000007603	IPR000571	Znf_CCCH	Dus3l
ENSMUSG00000007646	IPR010995	DNA_repair_Rad51/TF_NusA_a-hlx	Rad51c
ENSMUSG00000007805	IPR011598	bHLH_dom	Twist2
ENSMUSG00000007812	IPR001909, IPR007087, IPR015880	Krueppel-associated_box, Znf_C2H2, Znf_C2H2-like	Zfp655
ENSMUSG00000007817	IPR004181	Znf_MIZ	Zmiz1
ENSMUSG00000007872	IPR011598	bHLH_dom	Id3
ENSMUSG00000007880	IPR001606	ARID_dom	Arid1a
ENSMUSG00000007946	IPR001356, IPR009057	Homeobox_dom, Homeodomain-like	Phox2a
ENSMUSG00000008035	IPR009786	Spot_14	Mid1ip1
ENSMUSG00000008193	IPR000418	Ets_dom	Spib
ENSMUSG00000008206	IPR001356, IPR009057	Homeobox_dom, Homeodomain-like	Cers4
ENSMUSG00000008305	IPR009146	Groucho_enhance	Tle1
ENSMUSG00000008393	IPR002059, IPR011129	CSP_DNA-bd, Cold_shock_prot	Carhsp1
ENSMUSG00000008398	IPR000418	Ets_dom	Elk3
ENSMUSG00000008496	IPR000327, IPR000972, IPR001356, IPR009057, IPR010982, IPR013847	POU_specific, TF_octamer, Homeobox_dom, Homeodomain-like, Lambda_DNA-bd_dom, POU	Pou2f2
ENSMUSG00000008575	IPR000647, IPR003619	CTF/NFI, MAD_homology1_Dwarfin-type	Nfib
ENSMUSG00000008855	IPR000286, IPR017320	His_deacetylse, Histone_deAcase_II_euk	Hdac5
ENSMUSG00000008958	IPR008895	YL1	Vps72
ENSMUSG00000008976	IPR000418, IPR003118, IPR016312	Ets_dom, Pointed_dom, TF_GA-bd_asu	Gabpa
ENSMUSG00000009076	IPR000571	Znf_CCCH	Zmat5
ENSMUSG00000009097	IPR001699, IPR008967	TF_T-box, p53-like_TF_DNA-bd	Tbx1
ENSMUSG00000009248	IPR011598	bHLH_dom	Ascl2
ENSMUSG00000009376	IPR002909	IPT	Met
ENSMUSG00000009406	IPR000418	Ets_dom	Elk1
ENSMUSG00000009471	IPR002546, IPR011598	Basic, bHLH_dom	Myod1
ENSMUSG00000009569	IPR004018	RPEL_repeat	Mkl2
ENSMUSG00000009575	IPR000953, IPR008251, IPR016197	Chromo/shadow_dom, Chromo_shadow_dom, Chromodomain-like	Cbx5
ENSMUSG00000009596	IPR006751	TAFII55_prot_cons_reg	Taf7l
ENSMUSG00000009640	IPR008468	DMAP1	Dmap1
ENSMUSG00000009733	IPR007604	CP2	Tfcp2
ENSMUSG00000009734	IPR000327, IPR001356, IPR009057, IPR010982, IPR013847	POU_specific, Homeobox_dom, Homeodomain-like, Lambda_DNA-bd_dom, POU	Pou6f2
ENSMUSG00000009739	IPR000327, IPR001356, IPR009057, IPR010982, IPR013847	POU_specific, Homeobox_dom, Homeodomain-like, Lambda_DNA-bd_dom, POU	Pou6f1
ENSMUSG00000009741	IPR007604	CP2	Ubp1
ENSMUSG00000010175	IPR009057	Homeodomain-like	Prox1
ENSMUSG00000010476	IPR002909	IPT	Ebf3
ENSMUSG00000010505	IPR002515, IPR013681	Znf_C2HC, Myelin_TF	Myt1
ENSMUSG00000011114	IPR003888, IPR003889	FYrich_N, FYrich_C	Tbrg1
ENSMUSG00000011158	IPR000812, IPR013137	TFIIB, Znf_TFIIB	Brf1
ENSMUSG00000011267	IPR007087, IPR015880	Znf_C2H2, Znf_C2H2-like	Zfp296
ENSMUSG00000011349	IPR001275	DM_DNA-bd	Dmrtc2
ENSMUSG00000011427	IPR001909, IPR007087, IPR015880	Krueppel-associated_box, Znf_C2H2, Znf_C2H2-like	Zfp790
ENSMUSG00000012076	IPR013907	Sds3	Brms1l
ENSMUSG00000012350	IPR000418, IPR003118	Ets_dom, Pointed_dom	Ehf
ENSMUSG00000012396	IPR001356, IPR009057	Homeobox_dom, Homeodomain-like	Nanog
ENSMUSG00000012520	IPR001356, IPR009057	Homeobox_dom, Homeodomain-like	Phox2b
ENSMUSG00000012640	IPR001909, IPR007087, IPR015880	Krueppel-associated_box, Znf_C2H2, Znf_C2H2-like	Zfp715
ENSMUSG00000013089	IPR000418, IPR006715	Ets_dom, ETS_PEA3_N	Etv5
ENSMUSG00000013419	IPR007087, IPR013069, IPR015880	Znf_C2H2, BTB_POZ, Znf_C2H2-like	Zfp651
ENSMUSG00000013465	IPR010405	COBRA1	Nelfb
ENSMUSG00000013787	IPR001214, IPR003606, IPR007728	SET_dom, Pre-SET_Zn-bd_sub, Pre-SET_dom	Ehmt2
ENSMUSG00000013822	IPR007808	Elf1	Elof1
ENSMUSG00000014030	IPR001523, IPR009057	Paired_dom, Homeodomain-like	Pax5
ENSMUSG00000014039	IPR001214, IPR007087, IPR015880	SET_dom, Znf_C2H2, Znf_C2H2-like	Prdm15
ENSMUSG00000014164	IPR013069	BTB_POZ	Klhl3
ENSMUSG00000014198	IPR007087, IPR015880	Znf_C2H2, Znf_C2H2-like	Zfp385c
ENSMUSG00000014303	IPR007087, IPR015880	Znf_C2H2, Znf_C2H2-like	Glis2
ENSMUSG00000014550	IPR007087	Znf_C2H2	Rbsn
ENSMUSG00000014592	IPR002909, IPR005559	IPT, CG-1_dom	Camta1
ENSMUSG00000014602	IPR008984	SMAD_FHA_domain	Kif1a
ENSMUSG00000014603	IPR001356, IPR009057	Homeobox_dom, Homeodomain-like	Alx3
ENSMUSG00000014668	IPR008984	SMAD_FHA_domain	Chfr
ENSMUSG00000014704	IPR001356, IPR001827, IPR009057	Homeobox_dom, Homeobox_Antennapedia_CS, Homeodomain-like	Hoxa2
ENSMUSG00000014767	IPR000814	TBP	Tbp
ENSMUSG00000014859	IPR003316	E2F_WHTH_DNA-bd_dom	E2f4
ENSMUSG00000015053	IPR000679, IPR016374	Znf_GATA, TF_GATA-2/3	Gata2
ENSMUSG00000015092	IPR001387, IPR010982	Cro/C1-type_HTH, Lambda_DNA-bd_dom	Edf1
ENSMUSG00000015127	IPR000571	Znf_CCCH	Unkl
ENSMUSG00000015149	IPR003000	Sirtuin	Sirt2
ENSMUSG00000015217	IPR009071	HMG_box_dom	Hmgb3
ENSMUSG00000015335	IPR001594	Znf_DHHC_palmitoyltrfase	Zdhhc12
ENSMUSG00000015461	IPR004827	bZIP	Atf6b
ENSMUSG00000015501	IPR007087, IPR015880	Znf_C2H2, Znf_C2H2-like	Hivep2
ENSMUSG00000015522	IPR001067, IPR011598	Nuc_translocat, bHLH_dom	Arnt
ENSMUSG00000015542	IPR000182	GNAT_dom	Nat9
ENSMUSG00000015579	IPR001356, IPR009057	Homeobox_dom, Homeodomain-like	Nkx2-5
ENSMUSG00000015605	IPR002100	TF_MADSbox	Srf
ENSMUSG00000015619	IPR000679, IPR016374	Znf_GATA, TF_GATA-2/3	Gata3
ENSMUSG00000015627	IPR000679, IPR008013, IPR016375	Znf_GATA, GATA_N, TF_GATA_4/5/6	Gata5
ENSMUSG00000015697	IPR001214, IPR001739, IPR003606, IPR003616, IPR007728, IPR016177	SET_dom, Methyl_CpG_DNA-bd, Pre-SET_Zn-bd_sub, Post-SET_dom, Pre-SET_dom, DNA-bd_dom	Setdb1
ENSMUSG00000015709	IPR001067, IPR011598	Nuc_translocat, bHLH_dom	Arnt2
ENSMUSG00000015714	IPR001356, IPR009057	Homeobox_dom, Homeodomain-like	Cers2
ENSMUSG00000015839	IPR004826, IPR004827, IPR008917	bZIP_Maf, bZIP, TF_DNA-bd	Nfe2l2
ENSMUSG00000015843	IPR000003, IPR000536, IPR001628, IPR001723, IPR008946	Retinoid-X_rcpt/HNF4, Nucl_hrmn_rcpt_lig-bd_core, Znf_hrmn_rcpt, Str_hrmn_rcpt, Nucl_hormone_rcpt_ligand-bd	Rxrg
ENSMUSG00000015846	IPR000003, IPR000536, IPR001628, IPR001723, IPR008946	Retinoid-X_rcpt/HNF4, Nucl_hrmn_rcpt_lig-bd_core, Znf_hrmn_rcpt, Str_hrmn_rcpt, Nucl_hormone_rcpt_ligand-bd	Rxra
ENSMUSG00000015882	IPR007889, IPR009057	HTH_Psq, Homeodomain-like	Lcorl
ENSMUSG00000015943	IPR002634	BolA	Bola1
ENSMUSG00000016087	IPR000418, IPR003118	Ets_dom, Pointed_dom	Fli1
ENSMUSG00000016458	IPR000976, IPR007087, IPR015880	Wilms_tumour_N, Znf_C2H2, Znf_C2H2-like	Wt1
ENSMUSG00000016477	IPR003316	E2F_WHTH_DNA-bd_dom	E2f3
ENSMUSG00000016503	IPR007087, IPR015880	Znf_C2H2, Znf_C2H2-like	Gtf3a
ENSMUSG00000016624	IPR001965	Znf_PHD	Phf21b
ENSMUSG00000016831	IPR009071	HMG_box_dom	Tox4
ENSMUSG00000017007	IPR002909, IPR008967, IPR015350, IPR015351	IPT, p53-like_TF_DNA-bd, Beta-trefoil_DNA-bd_dom, LAG1_DNA-bd	Rbpjl
ENSMUSG00000017405	IPR000408	Reg_chr_condens	Nek8
ENSMUSG00000017421	IPR007087, IPR015880	Znf_C2H2, Znf_C2H2-like	Zfp207
ENSMUSG00000017478	IPR000571	Znf_CCCH	Zc3h18
ENSMUSG00000017491	IPR000536, IPR001628, IPR001723, IPR003078, IPR008946	Nucl_hrmn_rcpt_lig-bd_core, Znf_hrmn_rcpt, Str_hrmn_rcpt, Retinoic_acid_rcpt, Nucl_hormone_rcpt_ligand-bd	Rarb
ENSMUSG00000017667	IPR001909, IPR007087, IPR015880	Krueppel-associated_box, Znf_C2H2, Znf_C2H2-like	Zfp334
ENSMUSG00000017688	IPR000536, IPR001628, IPR001723, IPR003068, IPR008946	Nucl_hrmn_rcpt_lig-bd_core, Znf_hrmn_rcpt, Str_hrmn_rcpt, COUP_TF, Nucl_hormone_rcpt_ligand-bd	Hnf4g
ENSMUSG00000017724	IPR000418, IPR006715	Ets_dom, ETS_PEA3_N	Etv4
ENSMUSG00000017801	IPR011598	bHLH_dom	Mlx
ENSMUSG00000017861	IPR001005, IPR009057	SANT/Myb, Homeodomain-like	Mybl2
ENSMUSG00000017950	IPR000536, IPR001628, IPR001723, IPR003068, IPR008946	Nucl_hrmn_rcpt_lig-bd_core, Znf_hrmn_rcpt, Str_hrmn_rcpt, COUP_TF, Nucl_hormone_rcpt_ligand-bd	Hnf4a
ENSMUSG00000018143	IPR004826, IPR004827, IPR008917	bZIP_Maf, bZIP, TF_DNA-bd	Mafk
ENSMUSG00000018168	IPR007087, IPR015880	Znf_C2H2, Znf_C2H2-like	Ikzf3
ENSMUSG00000018263	IPR001699, IPR008967	TF_T-box, p53-like_TF_DNA-bd	Tbx5
ENSMUSG00000018347	IPR001909, IPR003309, IPR007087, IPR015880	Krueppel-associated_box, Tscrpt_reg_SCAN, Znf_C2H2, Znf_C2H2-like	Zkscan6
ENSMUSG00000018377	IPR007087, IPR015880	Znf_C2H2, Znf_C2H2-like	Vezf1
ENSMUSG00000018474	IPR000330, IPR000953, IPR001965, IPR009071, IPR012957, IPR012958, IPR016197	SNF2_N, Chromo/shadow_dom, Znf_PHD, HMG_box_dom, CHD_C2, CHD_N, Chromodomain-like	Chd3
ENSMUSG00000018501	IPR001005, IPR009057	SANT/Myb, Homeodomain-like	Ncor1
ENSMUSG00000018554	IPR002059, IPR011129	CSP_DNA-bd, Cold_shock_prot	Ybx2
ENSMUSG00000018572	IPR001965	Znf_PHD	Phf23
ENSMUSG00000018604	IPR001699, IPR002070, IPR008967	TF_T-box, TF_Brachyury, p53-like_TF_DNA-bd	Tbx3
ENSMUSG00000018651	IPR001005, IPR009057, IPR016827	SANT/Myb, Homeodomain-like, Ada2/TADA2	Tada2a
ENSMUSG00000018654	IPR007087, IPR015880	Znf_C2H2, Znf_C2H2-like	Ikzf1
ENSMUSG00000018666	IPR000953, IPR008251, IPR016197	Chromo/shadow_dom, Chromo_shadow_dom, Chromodomain-like	Cbx1
ENSMUSG00000018678	IPR007087, IPR015880	Znf_C2H2, Znf_C2H2-like	Sp2
ENSMUSG00000018698	IPR001356, IPR009057	Homeobox_dom, Homeodomain-like	Lhx1
ENSMUSG00000018727	IPR000571	Znf_CCCH	Cpsf4l
ENSMUSG00000018750	IPR007087, IPR013069, IPR015880	Znf_C2H2, BTB_POZ, Znf_C2H2-like	Zbtb4
ENSMUSG00000018809	IPR001214	SET_dom	Smyd4
ENSMUSG00000018899	IPR001346	Interferon_reg_fact_DNA-bd_dom	Irf1
ENSMUSG00000018973	IPR001356, IPR009057	Homeobox_dom, Homeodomain-like	Hoxb1
ENSMUSG00000018983	IPR003316	E2F_WHTH_DNA-bd_dom	E2f2
ENSMUSG00000019230	IPR001356, IPR009057	Homeobox_dom, Homeodomain-like	Lhx9
ENSMUSG00000019256	IPR011598	bHLH_dom	Ahr
ENSMUSG00000019338	IPR007087, IPR015880	Znf_C2H2, Znf_C2H2-like	Zfp687
ENSMUSG00000019564	IPR001606	ARID_dom	Arid3a
ENSMUSG00000019738	IPR001222, IPR001529	Znf_TFIIS, DNA-dir_RNA_pol_M/15kDasu	Polr2i
ENSMUSG00000019768	IPR000536, IPR001292, IPR001628, IPR001723, IPR008946	Nucl_hrmn_rcpt_lig-bd_core, Oestr_rcpt, Znf_hrmn_rcpt, Str_hrmn_rcpt, Nucl_hormone_rcpt_ligand-bd	Esr1
ENSMUSG00000019777	IPR000286, IPR003084	His_deacetylse, His_deacetylse_1	Hdac2
ENSMUSG00000019789	IPR003650, IPR011598	Orange, bHLH_dom	Hey2
ENSMUSG00000019792	IPR002052	DNA_methylase_N6_adenine_CS	Trmt11
ENSMUSG00000019803	IPR000536, IPR001628, IPR001723, IPR003068, IPR008946	Nucl_hrmn_rcpt_lig-bd_core, Znf_hrmn_rcpt, Str_hrmn_rcpt, COUP_TF, Nucl_hormone_rcpt_ligand-bd	Nr2e1
ENSMUSG00000019817	IPR007087, IPR015880	Znf_C2H2, Znf_C2H2-like	Plagl1
ENSMUSG00000019826	IPR007087, IPR013069, IPR015880	Znf_C2H2, BTB_POZ, Znf_C2H2-like	Zbtb24
ENSMUSG00000019853	IPR011256	Reg_factor_effector_dom	Hebp2
ENSMUSG00000019857	IPR006818	Histone_chaperone_ASF1-like	Asf1a
ENSMUSG00000019878	IPR000232, IPR010542	HSF_DNA-bd, Vert_HSTF_C	Hsf2
ENSMUSG00000019900	IPR003150	DNA-bd_RFX	Rfx6
ENSMUSG00000019913	IPR010578, IPR011598	SIM_C, bHLH_dom	Sim1
ENSMUSG00000019944	IPR013069	BTB_POZ	Rhobtb1
ENSMUSG00000019947	IPR001606	ARID_dom	Arid5b
ENSMUSG00000019982	IPR001005, IPR009057	SANT/Myb, Homeodomain-like	Myb
ENSMUSG00000020037	IPR003150	DNA-bd_RFX	Rfx4
ENSMUSG00000020042	IPR013069	BTB_POZ	Btbd11
ENSMUSG00000020052	IPR011598	bHLH_dom	Ascl1
ENSMUSG00000020063	IPR003000	Sirtuin	Sirt1
ENSMUSG00000020064	IPR000408	Reg_chr_condens	Herc4
ENSMUSG00000020137	IPR006612	Znf_C2CH	Thap2
ENSMUSG00000020160	IPR001356, IPR008422, IPR009057	Homeobox_dom, Homeobox_KN_domain, Homeodomain-like	Meis1
ENSMUSG00000020166	IPR007282	NOT	Cnot2
ENSMUSG00000020167	IPR011598	bHLH_dom	Tcf3
ENSMUSG00000020171	IPR005033	YEATS	Yeats4
ENSMUSG00000020185	IPR003316	E2F_WHTH_DNA-bd_dom	E2f7
ENSMUSG00000020232	IPR009071	HMG_box_dom	Hmg20b
ENSMUSG00000020248	IPR003956, IPR003958	Transcrpt_fac_NFYB/HAP3_CS, CBFA_NFYB_domain	Nfyb
ENSMUSG00000020275	IPR000451, IPR002909, IPR008967, IPR011539	NFkB/Dor, IPT, p53-like_TF_DNA-bd, RHD	Rel
ENSMUSG00000020329	IPR002092	DNA-dir_Rpol_phage-type	Polrmt
ENSMUSG00000020335	IPR001909, IPR007087, IPR015880	Krueppel-associated_box, Znf_C2H2, Znf_C2H2-like	Zfp354b
ENSMUSG00000020364	IPR001909, IPR007087, IPR015880	Krueppel-associated_box, Znf_C2H2, Znf_C2H2-like	Zfp354a
ENSMUSG00000020387	IPR001965	Znf_PHD	Jade2
ENSMUSG00000020397	IPR009244	Mediatior_Med7	Med7
ENSMUSG00000020420	IPR001909, IPR007087, IPR015880	Krueppel-associated_box, Znf_C2H2, Znf_C2H2-like	Zfp607
ENSMUSG00000020453	IPR000637, IPR007087, IPR013069, IPR015880	HMGI/Y_DNA-bd_CS, Znf_C2H2, BTB_POZ, Znf_C2H2-like	Patz1
ENSMUSG00000020472	IPR001909, IPR003309, IPR007087, IPR015880	Krueppel-associated_box, Tscrpt_reg_SCAN, Znf_C2H2, Znf_C2H2-like	Zkscan17
ENSMUSG00000020484	IPR004827	bZIP	Xbp1
ENSMUSG00000020485	IPR009287	Spt4	Supt4a
ENSMUSG00000020491	IPR001909, IPR007087, IPR015880	Krueppel-associated_box, Znf_C2H2, Znf_C2H2-like	2810021J22Rik
ENSMUSG00000020526	IPR007529	Znf_HIT	Znhit3
ENSMUSG00000020538	IPR011598	bHLH_dom	Srebf1
ENSMUSG00000020542	IPR004018	RPEL_repeat	Myocd
ENSMUSG00000020561	IPR005576	RNA_pol_Rpb7_N	Twistnb
ENSMUSG00000020564	IPR013243	SCA7_dom	Atxn7l1
ENSMUSG00000020627	IPR013069	BTB_POZ	Klhl29
ENSMUSG00000020644	IPR011598	bHLH_dom	Id2
ENSMUSG00000020647	IPR009110, IPR011598, IPR014920, IPR017426	Nuc_rcpt_coact, bHLH_dom, Nuc_rcpt_coact_Ncoa-typ, Nuclear_rcpt_coactivator	Ncoa1
ENSMUSG00000020653	IPR007087, IPR015880	Znf_C2H2, Znf_C2H2-like	Klf11
ENSMUSG00000020656	IPR007604	CP2	Grhl1
ENSMUSG00000020661	IPR001525	C5_MeTfrase	Dnmt3a
ENSMUSG00000020679	IPR001356, IPR009057, IPR010982	Homeobox_dom, Homeodomain-like, Lambda_DNA-bd_dom	Hnf1b
ENSMUSG00000020721	IPR000571	Znf_CCCH	Helz
ENSMUSG00000020755	IPR012479	SAP30BP	Sap30bp
ENSMUSG00000020770	IPR000571	Znf_CCCH	Unk
ENSMUSG00000020790	IPR013069	BTB_POZ	Ankfy1
ENSMUSG00000020801	IPR008831	Mediator_Med31	Med31
ENSMUSG00000020804	IPR000182	GNAT_dom	Aanat
ENSMUSG00000020821	IPR008984	SMAD_FHA_domain	Kif1c
ENSMUSG00000020831	IPR009057	Homeodomain-like	0610010K14Rik
ENSMUSG00000020871	IPR000047, IPR001356, IPR009057	HTH_motif, Homeobox_dom, Homeodomain-like	Dlx4
ENSMUSG00000020875	IPR001356, IPR009057, IPR017112	Homeobox_dom, Homeodomain-like, Homeobox_Hox9	Hoxb9
ENSMUSG00000020889	IPR000536, IPR001628, IPR001723, IPR008946	Nucl_hrmn_rcpt_lig-bd_core, Znf_hrmn_rcpt, Str_hrmn_rcpt, Nucl_hormone_rcpt_ligand-bd	Nr1d1
ENSMUSG00000020918	IPR000182, IPR009464, IPR016376	GNAT_dom, PCAF_N, Hist_acetylase_PCAF	Kat2a
ENSMUSG00000020919	IPR008967, IPR013801, IPR015988	p53-like_TF_DNA-bd, STAT_TF_DNA-bd, STAT_TF_coiled-coil	Stat5b
ENSMUSG00000020923	IPR009071	HMG_box_dom	Ubtf
ENSMUSG00000020932	IPR006821	Intermed_filament_DNA-bd	Gfap
ENSMUSG00000020948	IPR013069	BTB_POZ	Klhl28
ENSMUSG00000020950	IPR001766	TF_fork_head	Foxg1
ENSMUSG00000020962	IPR004855	TFIIA_asu/bsu	Gtf2a1
ENSMUSG00000021010	IPR011598	bHLH_dom	Npas3
ENSMUSG00000021012	IPR000571	Znf_CCCH	Zc3h14
ENSMUSG00000021055	IPR000536, IPR001628, IPR001723, IPR008946	Nucl_hrmn_rcpt_lig-bd_core, Znf_hrmn_rcpt, Str_hrmn_rcpt, Nucl_hormone_rcpt_ligand-bd	Esr2
ENSMUSG00000021095	IPR001356, IPR009057	Homeobox_dom, Homeodomain-like	Gsc
ENSMUSG00000021099	IPR001356, IPR009057	Homeobox_dom, Homeodomain-like	Six6
ENSMUSG00000021109	IPR001321, IPR011598	HIF-1_alpha, bHLH_dom	Hif1a
ENSMUSG00000021127	IPR000571	Znf_CCCH	Zfp36l1
ENSMUSG00000021144	IPR000679, IPR000949, IPR001005, IPR001025, IPR009057	Znf_GATA, ELM2_dom, SANT/Myb, BAH_dom, Homeodomain-like	Mta1
ENSMUSG00000021156	IPR001965	Znf_PHD	Zmynd11
ENSMUSG00000021217	IPR001356, IPR007087, IPR015880	Homeobox_dom, Znf_C2H2, Znf_C2H2-like	Tshz3
ENSMUSG00000021221	IPR001965, IPR007087, IPR015880	Znf_PHD, Znf_C2H2, Znf_C2H2-like	Dpf3
ENSMUSG00000021239	IPR001356, IPR003654, IPR009057	Homeobox_dom, OAR_dom, Homeodomain-like	Vsx2
ENSMUSG00000021250	IPR000837, IPR004827	AP-1, bZIP	Fos
ENSMUSG00000021255	IPR000536, IPR001628, IPR001723, IPR008946	Nucl_hrmn_rcpt_lig-bd_core, Znf_hrmn_rcpt, Str_hrmn_rcpt, Nucl_hormone_rcpt_ligand-bd	Esrrb
ENSMUSG00000021264	IPR007087, IPR015880	Znf_C2H2, Znf_C2H2-like	Yy1
ENSMUSG00000021271	IPR007087	Znf_C2H2	Zfp839
ENSMUSG00000021318	IPR007087, IPR015880	Znf_C2H2, Znf_C2H2-like	Gli3
ENSMUSG00000021327	IPR001909, IPR003309, IPR007087, IPR015880	Krueppel-associated_box, Tscrpt_reg_SCAN, Znf_C2H2, Znf_C2H2-like	Zkscan3
ENSMUSG00000021356	IPR001346, IPR008984	Interferon_reg_fact_DNA-bd_dom, SMAD_FHA_domain	Irf4
ENSMUSG00000021357	IPR002909	IPT	Exoc2
ENSMUSG00000021359	IPR008121, IPR013854	TF_AP2_alpha_N, TF_AP2_C	Tfap2a
ENSMUSG00000021362	IPR003902	Tscrpt_reg_GCM	Gcm2
ENSMUSG00000021366	IPR007087, IPR015880	Znf_C2H2, Znf_C2H2-like	Hivep1
ENSMUSG00000021375	IPR008984	SMAD_FHA_domain	Kif13a
ENSMUSG00000021377	IPR014876	DEK_C	Dek
ENSMUSG00000021379	IPR011598	bHLH_dom	Id4
ENSMUSG00000021381	IPR000047, IPR001356, IPR009057	HTH_motif, Homeobox_dom, Homeodomain-like	Barx1
ENSMUSG00000021400	IPR006642	Znf_Rad18_put	Wrnip1
ENSMUSG00000021469	IPR001356, IPR009057	Homeobox_dom, Homeodomain-like	Msx2
ENSMUSG00000021470	IPR000330	SNF2_N	Ercc6l2
ENSMUSG00000021481	IPR007087, IPR015880	Znf_C2H2, Znf_C2H2-like	Zfp346
ENSMUSG00000021485	IPR011598	bHLH_dom	Mxd3
ENSMUSG00000021488	IPR001214, IPR001965, IPR003616, IPR006560	SET_dom, Znf_PHD, Post-SET_dom, AWS_dom	Nsd1
ENSMUSG00000021506	IPR001356, IPR003654, IPR009057, IPR016233	Homeobox_dom, OAR_dom, Homeodomain-like, Homeobox_Pitx/unc30	Pitx1
ENSMUSG00000021510	IPR001909, IPR001965, IPR007087, IPR015880	Krueppel-associated_box, Znf_PHD, Znf_C2H2, Znf_C2H2-like	Zfp729a
ENSMUSG00000021514	IPR001909, IPR003309, IPR007087, IPR015880	Krueppel-associated_box, Tscrpt_reg_SCAN, Znf_C2H2, Znf_C2H2-like	Zfp369
ENSMUSG00000021519	IPR003690	MTERF	Mterf3
ENSMUSG00000021540	IPR001132, IPR003619, IPR008984, IPR013019	SMAD_dom_Dwarfin-type, MAD_homology1_Dwarfin-type, SMAD_FHA_domain, MAD_homology_MH1	Smad5
ENSMUSG00000021575	IPR011598	bHLH_dom	Ahrr
ENSMUSG00000021589	IPR013069	BTB_POZ	Rhobtb3
ENSMUSG00000021604	IPR001356, IPR003893, IPR008422, IPR009057	Homeobox_dom, Iroquois_homeo, Homeobox_KN_domain, Homeodomain-like	Irx4
ENSMUSG00000021639	IPR007087, IPR007198, IPR012170	Znf_C2H2, Ssl1-like, TFIIH_SSL1/p44	Gtf2h2
ENSMUSG00000021668	IPR006642	Znf_Rad18_put	Polk
ENSMUSG00000021681	IPR008984	SMAD_FHA_domain	Aggf1
ENSMUSG00000021685	IPR000047, IPR001356, IPR003654, IPR009057	HTH_motif, Homeobox_dom, OAR_dom, Homeodomain-like	Otp
ENSMUSG00000021712	IPR007087	Znf_C2H2	Trim23
ENSMUSG00000021738	IPR013243	SCA7_dom	Atxn7
ENSMUSG00000021743	IPR007087, IPR015880	Znf_C2H2, Znf_C2H2-like	Fezf2
ENSMUSG00000021767	IPR001965	Znf_PHD	Kat6b
ENSMUSG00000021775	IPR000536, IPR001628, IPR001723, IPR001728, IPR008946	Nucl_hrmn_rcpt_lig-bd_core, Znf_hrmn_rcpt, Str_hrmn_rcpt, ThyrH_rcpt, Nucl_hormone_rcpt_ligand-bd	Nr1d2
ENSMUSG00000021779	IPR000536, IPR001628, IPR001723, IPR001728, IPR008946	Nucl_hrmn_rcpt_lig-bd_core, Znf_hrmn_rcpt, Str_hrmn_rcpt, ThyrH_rcpt, Nucl_hormone_rcpt_ligand-bd	Thrb
ENSMUSG00000021810	IPR010770	SGT1	Ecd
ENSMUSG00000021848	IPR001356, IPR003022, IPR003025, IPR009057, IPR013851	Homeobox_dom, Otx2_TF, Otx_TF, Homeodomain-like, Otx_TF_C	Otx2
ENSMUSG00000021870	IPR008984	SMAD_FHA_domain	Slmap
ENSMUSG00000021902	IPR001965	Znf_PHD	Phf7
ENSMUSG00000021905	IPR007872	Znf_DHP	Dph3
ENSMUSG00000021944	IPR000679, IPR008013, IPR016375	Znf_GATA, GATA_N, TF_GATA_4/5/6	Gata4
ENSMUSG00000021945	IPR010507	Znf_MYM	Zmym2
ENSMUSG00000021951	IPR002052	DNA_methylase_N6_adenine_CS	N6amt2
ENSMUSG00000021963	IPR010516, IPR017250	SAP18, Hist_deAcase_cplx_SAP18	Sap18
ENSMUSG00000021969	IPR001594	Znf_DHHC_palmitoyltrfase	Zdhhc20
ENSMUSG00000021972	IPR001356, IPR009057, IPR010982	Homeobox_dom, Homeodomain-like, Lambda_DNA-bd_dom	Hmbox1
ENSMUSG00000022000	IPR000571	Znf_CCCH	Zc3h13
ENSMUSG00000022009	IPR007087, IPR015880	Znf_C2H2, Znf_C2H2-like	Nufip1
ENSMUSG00000022010	IPR000580	TSC-22_Dip_Bun	Tsc22d1
ENSMUSG00000022031	IPR000182, IPR005910	GNAT_dom, Hist_AcTrfase_ELP3	Elp3
ENSMUSG00000022053	IPR002909	IPT	Ebf2
ENSMUSG00000022054	IPR006821	Intermed_filament_DNA-bd	Nefm
ENSMUSG00000022055	IPR006821	Intermed_filament_DNA-bd	Nefl
ENSMUSG00000022061	IPR001356, IPR009057	Homeobox_dom, Homeodomain-like	Nkx3-1
ENSMUSG00000022075	IPR013069	BTB_POZ	Rhobtb2
ENSMUSG00000022076	IPR013069	BTB_POZ	Klhl1
ENSMUSG00000022106	IPR000408, IPR013069	Reg_chr_condens, BTB_POZ	Rcbtb2
ENSMUSG00000022119	IPR000571	Znf_CCCH	Rbm26
ENSMUSG00000022139	IPR000571	Znf_CCCH	Mbnl2
ENSMUSG00000022201	IPR007087, IPR015880	Znf_C2H2, Znf_C2H2-like	Zfr
ENSMUSG00000022205	IPR003173, IPR009044	PC4, ssDNA-bd_transcriptional_reg	Sub1
ENSMUSG00000022228	IPR003309, IPR007087, IPR015880	Tscrpt_reg_SCAN, Znf_C2H2, Znf_C2H2-like	Zscan26
ENSMUSG00000022245	IPR009061, IPR010919	DNA-bd_dom_put, SAND_dom-like	Skor1
ENSMUSG00000022286	IPR007604	CP2	Grhl2
ENSMUSG00000022306	IPR007087, IPR015880	Znf_C2H2, Znf_C2H2-like	Zfpm2
ENSMUSG00000022330	IPR007087, IPR015880	Znf_C2H2, Znf_C2H2-like	Osr2
ENSMUSG00000022335	IPR007087, IPR015880	Znf_C2H2, Znf_C2H2-like	Zfat
ENSMUSG00000022346	IPR002418, IPR003327, IPR011598, IPR012682	Tscrpt_reg_Myc, Myc-LZ, bHLH_dom, Tscrpt_reg_Myc_N	Myc
ENSMUSG00000022357	IPR013069	BTB_POZ	Klhl38
ENSMUSG00000022361	IPR001356, IPR007087, IPR009057, IPR015880	Homeobox_dom, Znf_C2H2, Homeodomain-like, Znf_C2H2-like	Zhx1
ENSMUSG00000022383	IPR000536, IPR001628, IPR001723, IPR003074, IPR003076, IPR008946	Nucl_hrmn_rcpt_lig-bd_core, Znf_hrmn_rcpt, Str_hrmn_rcpt, 1Cnucl_rcpt, 1Cnucl_rcpt_A, Nucl_hormone_rcpt_ligand-bd	Ppara
ENSMUSG00000022387	IPR001965	Znf_PHD	Brd1
ENSMUSG00000022389	IPR004827	bZIP	Tef
ENSMUSG00000022390	IPR000571	Znf_CCCH	Zc3h7b
ENSMUSG00000022394	IPR004092	Mbt	L3mbtl2
ENSMUSG00000022429	IPR010995	DNA_repair_Rad51/TF_NusA_a-hlx	Dmc1
ENSMUSG00000022463	IPR011598	bHLH_dom	Srebf2
ENSMUSG00000022475	IPR000286, IPR017320	His_deacetylse, Histone_deAcase_II_euk	Hdac7
ENSMUSG00000022476	IPR005576, IPR013238	RNA_pol_Rpb7_N, RNA_pol_III_Rbc25	Polr3h
ENSMUSG00000022479	IPR000324, IPR000536, IPR001628, IPR001723, IPR008946	VitD_rcpt, Nucl_hrmn_rcpt_lig-bd_core, Znf_hrmn_rcpt, Str_hrmn_rcpt, Nucl_hormone_rcpt_ligand-bd	Vdr
ENSMUSG00000022484	IPR001356, IPR009057	Homeobox_dom, Homeodomain-like	Hoxc10
ENSMUSG00000022485	IPR001356, IPR001827, IPR009057	Homeobox_dom, Homeobox_Antennapedia_CS, Homeodomain-like	Hoxc5
ENSMUSG00000022504	IPR008095	MHC_II_transact	Ciita
ENSMUSG00000022508	IPR007087, IPR013069, IPR015880	Znf_C2H2, BTB_POZ, Znf_C2H2-like	Bcl6
ENSMUSG00000022510	IPR002117, IPR008967, IPR011615	p53_tumour_suppressor, p53-like_TF_DNA-bd, p53_DNA-bd	Trp63
ENSMUSG00000022521	IPR000197, IPR009110, IPR010303, IPR014744	Znf_TAZ, Nuc_rcpt_coact, DUF902_CREBbp, Nuc_rcpt_coact_CREBbp	Crebbp
ENSMUSG00000022526	IPR001909, IPR007087, IPR015880	Krueppel-associated_box, Znf_C2H2, Znf_C2H2-like	Zfp251
ENSMUSG00000022528	IPR003650, IPR011598	Orange, bHLH_dom	Hes1
ENSMUSG00000022529	IPR001909, IPR003309, IPR007087, IPR015880	Krueppel-associated_box, Tscrpt_reg_SCAN, Znf_C2H2, Znf_C2H2-like	Zfp263
ENSMUSG00000022553	IPR015257	Maf1	Maf1
ENSMUSG00000022556	IPR000232, IPR010542	HSF_DNA-bd, Vert_HSTF_C	Hsf1
ENSMUSG00000022601	IPR007087, IPR013069, IPR015880	Znf_C2H2, BTB_POZ, Znf_C2H2-like	Zbtb11
ENSMUSG00000022641	IPR009071	HMG_box_dom	Bbx
ENSMUSG00000022652	IPR011124	Znf_CW	Morc1
ENSMUSG00000022676	IPR007087, IPR015880	Znf_C2H2, Znf_C2H2-like	Snai2
ENSMUSG00000022698	IPR000182	GNAT_dom	Naa50
ENSMUSG00000022702	IPR011494	Hira	Hira
ENSMUSG00000022708	IPR007087, IPR013069, IPR015880	Znf_C2H2, BTB_POZ, Znf_C2H2-like	Zbtb20
ENSMUSG00000022738	IPR001356, IPR009057	Homeobox_dom, Homeodomain-like	Gsc2
ENSMUSG00000022750	IPR013069	BTB_POZ	Klhl22
ENSMUSG00000022760	IPR006612	Znf_C2CH	Thap7
ENSMUSG00000022761	IPR013069	BTB_POZ	Lztr1
ENSMUSG00000022788	IPR007087	Znf_C2H2	Fgd4
ENSMUSG00000022809	IPR000536, IPR001628, IPR001723, IPR008946	Nucl_hrmn_rcpt_lig-bd_core, Znf_hrmn_rcpt, Str_hrmn_rcpt, Nucl_hormone_rcpt_ligand-bd	Nr1i2
ENSMUSG00000022811	IPR007087, IPR015880	Znf_C2H2, Znf_C2H2-like	Zfp148
ENSMUSG00000022828	IPR013137	Znf_TFIIB	Gtf2e1
ENSMUSG00000022895	IPR000418, IPR003118, IPR016311	Ets_dom, Pointed_dom, Transform_prot_C-ets	Ets2
ENSMUSG00000022948	IPR001214	SET_dom	Setd4
ENSMUSG00000022952	IPR000040, IPR008967, IPR013524, IPR016554	AML1_Runt, p53-like_TF_DNA-bd, Runt_dom, TF_Runt-rel_RUNX	Runx1
ENSMUSG00000022987	IPR001909, IPR007087, IPR015880	Krueppel-associated_box, Znf_C2H2, Znf_C2H2-like	Zfp641
ENSMUSG00000023021	IPR001356, IPR009057	Homeobox_dom, Homeodomain-like	Cers5
ENSMUSG00000023027	IPR001630, IPR004827	Leuzip_CREB, bZIP	Atf1
ENSMUSG00000023034	IPR000536, IPR001628, IPR001723, IPR003070, IPR003071, IPR008946	Nucl_hrmn_rcpt_lig-bd_core, Znf_hrmn_rcpt, Str_hrmn_rcpt, Nuc_orph_rcpt, Nuc_orp_HMR_rcpt, Nucl_hormone_rcpt_ligand-bd	Nr4a1
ENSMUSG00000023150	IPR013069	BTB_POZ	Ivns1abp
ENSMUSG00000023165	IPR001909, IPR003655	Krueppel-associated_box, Krueppel-associated_box-rel	Ssxb2
ENSMUSG00000023284	IPR001909, IPR007087, IPR015880	Krueppel-associated_box, Znf_C2H2, Znf_C2H2-like	Zfp605
ENSMUSG00000023333	IPR003902	Tscrpt_reg_GCM	Gcm1
ENSMUSG00000023350	IPR001965	Znf_PHD	4921501E09Rik
ENSMUSG00000023391	IPR000047, IPR001356, IPR009057	HTH_motif, Homeobox_dom, Homeodomain-like	Dlx2
ENSMUSG00000023411	IPR002909, IPR008366, IPR008967, IPR011539	IPT, NFAT, p53-like_TF_DNA-bd, RHD	Nfatc4
ENSMUSG00000023443	IPR000047, IPR001356, IPR009057	HTH_motif, Homeobox_dom, Homeodomain-like	Esx1
ENSMUSG00000023467	IPR000007	Tubby_C	Tulp2
ENSMUSG00000023484	IPR006821	Intermed_filament_DNA-bd	Prph
ENSMUSG00000023781	IPR003650, IPR011598	Orange, bHLH_dom	Hes7
ENSMUSG00000023852	IPR000330, IPR000953, IPR016197	SNF2_N, Chromo/shadow_dom, Chromodomain-like	Chd1
ENSMUSG00000023882	IPR001909, IPR007087, IPR015880	Krueppel-associated_box, Znf_C2H2, Znf_C2H2-like	Zfp54
ENSMUSG00000023883	IPR001965	Znf_PHD	Phf10
ENSMUSG00000023892	IPR001909, IPR007087, IPR015880	Krueppel-associated_box, Znf_C2H2, Znf_C2H2-like	Zfp51
ENSMUSG00000023902	IPR003309, IPR007087, IPR015880	Tscrpt_reg_SCAN, Znf_C2H2, Znf_C2H2-like	Zscan10
ENSMUSG00000023927	IPR001356, IPR003350, IPR009057, IPR010982	Homeobox_dom, CUT_dom, Homeodomain-like, Lambda_DNA-bd_dom	Satb1
ENSMUSG00000023932	IPR001005, IPR009057	SANT/Myb, Homeodomain-like	Cdc5l
ENSMUSG00000023984	IPR013921	Mediator_Med20	Gm20517
ENSMUSG00000023990	IPR011598	bHLH_dom	Tfeb
ENSMUSG00000023991	IPR001766	TF_fork_head	Foxp4
ENSMUSG00000023994	IPR001289	TF_CBFB	Nfya
ENSMUSG00000024050	IPR007087, IPR015880	Znf_C2H2, Znf_C2H2-like	Wiz
ENSMUSG00000024081	IPR005612	CCAAT-binding_factor	Cebpz
ENSMUSG00000024134	IPR001356, IPR009057	Homeobox_dom, Homeodomain-like	Six2
ENSMUSG00000024137	IPR007087, IPR015880	Znf_C2H2, Znf_C2H2-like	E4f1
ENSMUSG00000024140	IPR001067, IPR011598	Nuc_translocat, bHLH_dom	Epas1
ENSMUSG00000024154	IPR004855	TFIIA_asu/bsu	Gtf2a1l
ENSMUSG00000024176	IPR009071	HMG_box_dom	Sox8
ENSMUSG00000024193	IPR001965	Znf_PHD	Phf1
ENSMUSG00000024201	IPR001965	Znf_PHD	Kdm4b
ENSMUSG00000024206	IPR003150, IPR007668	DNA-bd_RFX, RFX1_trans_act	Rfx2
ENSMUSG00000024212	IPR005033	YEATS	Mllt1
ENSMUSG00000024215	IPR000418, IPR003118	Ets_dom, Pointed_dom	Spdef
ENSMUSG00000024218	IPR006809	TAFII28	Taf11
ENSMUSG00000024220	IPR007087, IPR015880	Znf_C2H2, Znf_C2H2-like	Zfp523
ENSMUSG00000024238	IPR007087, IPR009057, IPR015880	Znf_C2H2, Homeodomain-like, Znf_C2H2-like	Zeb1
ENSMUSG00000024240	IPR009607	Enhancer_polycomb_C	Epc1
ENSMUSG00000024258	IPR006590	RNA_pol_II_Rpb4_core	Polr2d
ENSMUSG00000024274	IPR003309	Tscrpt_reg_SCAN	Zscan30
ENSMUSG00000024276	IPR003309, IPR007087, IPR015880	Tscrpt_reg_SCAN, Znf_C2H2, Znf_C2H2-like	Zfp397
ENSMUSG00000024298	IPR001909, IPR007087, IPR015880	Krueppel-associated_box, Znf_C2H2, Znf_C2H2-like	Zfp871
ENSMUSG00000024406	IPR000327, IPR001356, IPR009057, IPR010982, IPR013847	POU_specific, Homeobox_dom, Homeodomain-like, Lambda_DNA-bd_dom, POU	Pou5f1
ENSMUSG00000024420	IPR007087, IPR015880	Znf_C2H2, Znf_C2H2-like	Zfp521
ENSMUSG00000024431	IPR000536, IPR001409, IPR001628, IPR001723, IPR008946	Nucl_hrmn_rcpt_lig-bd_core, Glcrtcd_rcpt, Znf_hrmn_rcpt, Str_hrmn_rcpt, Nucl_hormone_rcpt_ligand-bd	Nr3c1
ENSMUSG00000024454	IPR000286, IPR003084	His_deacetylse, His_deacetylse_1	Hdac3
ENSMUSG00000024491	IPR000571	Znf_CCCH	Rbm27
ENSMUSG00000024497	IPR000327, IPR001356, IPR009057, IPR010982, IPR013847	POU_specific, Homeobox_dom, Homeodomain-like, Lambda_DNA-bd_dom, POU	Pou4f3
ENSMUSG00000024513	IPR001739, IPR016177	Methyl_CpG_DNA-bd, DNA-bd_dom	Mbd2
ENSMUSG00000024515	IPR001132, IPR003619, IPR008984, IPR013019	SMAD_dom_Dwarfin-type, MAD_homology1_Dwarfin-type, SMAD_FHA_domain, MAD_homology_MH1	Smad4
ENSMUSG00000024518	IPR001356, IPR003654, IPR009057	Homeobox_dom, OAR_dom, Homeodomain-like	Rax
ENSMUSG00000024560	IPR001965, IPR002857	Znf_PHD, Znf_CXXC	Cxxc1
ENSMUSG00000024561	IPR001739, IPR002857, IPR016177	Methyl_CpG_DNA-bd, Znf_CXXC, DNA-bd_dom	Mbd1
ENSMUSG00000024563	IPR001132, IPR003619, IPR008984, IPR013019	SMAD_dom_Dwarfin-type, MAD_homology1_Dwarfin-type, SMAD_FHA_domain, MAD_homology_MH1	Smad2
ENSMUSG00000024565	IPR007087, IPR015880	Znf_C2H2, Znf_C2H2-like	Sall3
ENSMUSG00000024571	IPR000182	GNAT_dom	Gm16286
ENSMUSG00000024604	IPR000571	Znf_CCCH	Rbm22
ENSMUSG00000024619	IPR000047, IPR001356, IPR009057	HTH_motif, Homeobox_dom, Homeodomain-like	Cdx1
ENSMUSG00000024622	IPR009071	HMG_box_dom	Hmgxb3
ENSMUSG00000024642	IPR009146	Groucho_enhance	Tle4
ENSMUSG00000024695	IPR007087, IPR015880	Znf_C2H2, Znf_C2H2-like	Zfp91
ENSMUSG00000024764	IPR000182	GNAT_dom	Naa40
ENSMUSG00000024817	IPR001965, IPR003105	Znf_PHD, SRA_YDG	Uhrf2
ENSMUSG00000024826	IPR001965, IPR007087, IPR015880	Znf_PHD, Znf_C2H2, Znf_C2H2-like	Dpf2
ENSMUSG00000024837	IPR001275	DM_DNA-bd	Dmrt1
ENSMUSG00000024844	IPR004122	BAF_prot	Banf1
ENSMUSG00000024912	IPR000837, IPR004827	AP-1, bZIP	Fosl1
ENSMUSG00000024914	IPR003958	CBFA_NFYB_domain	Drap1
ENSMUSG00000024921	IPR000330	SNF2_N	Smarca2
ENSMUSG00000024922	IPR007087, IPR015880	Znf_C2H2, Znf_C2H2-like	Ovol1
ENSMUSG00000024926	IPR000953, IPR016197	Chromo/shadow_dom, Chromodomain-like	Kat5
ENSMUSG00000024927	IPR000451, IPR002909, IPR008967, IPR011539	NFkB/Dor, IPT, p53-like_TF_DNA-bd, RHD	Rela
ENSMUSG00000024955	IPR000536, IPR001628, IPR001723, IPR008946	Nucl_hrmn_rcpt_lig-bd_core, Znf_hrmn_rcpt, Str_hrmn_rcpt, Nucl_hormone_rcpt_ligand-bd	Esrra
ENSMUSG00000024968	IPR000949, IPR001005, IPR009057	ELM2_dom, SANT/Myb, Homeodomain-like	Rcor2
ENSMUSG00000024982	IPR001594	Znf_DHHC_palmitoyltrfase	Zdhhc6
ENSMUSG00000024985	IPR009071, IPR013558	HMG_box_dom, CTNNB1-bd_N	Tcf7l2
ENSMUSG00000024986	IPR001356, IPR009057	Homeobox_dom, Homeodomain-like	Hhex
ENSMUSG00000024999	IPR005612	CCAAT-binding_factor	Noc3l
ENSMUSG00000025001	IPR000330	SNF2_N	Hells
ENSMUSG00000025019	IPR007889, IPR009057	HTH_Psq, Homeodomain-like	Lcor
ENSMUSG00000025025	IPR011598	bHLH_dom	Mxi1
ENSMUSG00000025049	IPR007582	TFIID-su_WD40-assoc_reg	Taf5
ENSMUSG00000025056	IPR000536, IPR001723, IPR008946	Nucl_hrmn_rcpt_lig-bd_core, Str_hrmn_rcpt, Nucl_hormone_rcpt_ligand-bd	Nr0b1
ENSMUSG00000025103	IPR013069	BTB_POZ	Btbd1
ENSMUSG00000025105	IPR007087, IPR015880	Znf_C2H2, Znf_C2H2-like	Bnc1
ENSMUSG00000025128	IPR011598	bHLH_dom	Bhlhe22
ENSMUSG00000025138	IPR003000	Sirtuin	Sirt7
ENSMUSG00000025157	IPR001594	Znf_DHHC_palmitoyltrfase	Zdhhc16
ENSMUSG00000025215	IPR001356, IPR009057	Homeobox_dom, Homeodomain-like	Tlx1
ENSMUSG00000025216	IPR000047, IPR001356, IPR009057	HTH_motif, Homeobox_dom, Homeodomain-like	Lbx1
ENSMUSG00000025225	IPR000451, IPR002909, IPR008967, IPR011539	NFkB/Dor, IPT, p53-like_TF_DNA-bd, RHD	Nfkb2
ENSMUSG00000025229	IPR001356, IPR003654, IPR009057, IPR016233	Homeobox_dom, OAR_dom, Homeodomain-like, Homeobox_Pitx/unc30	Pitx3
ENSMUSG00000025255	IPR001356, IPR007087, IPR009057, IPR015880	Homeobox_dom, Znf_C2H2, Homeodomain-like, Znf_C2H2-like	Zfhx4
ENSMUSG00000025269	IPR010666	Znf_GRF	Apex2
ENSMUSG00000025280	IPR000722, IPR006592, IPR007066, IPR007080, IPR007081, IPR007083	RNA_pol_asu, RNA_pol_N, RNA_pol_Rpb1_3, RNA_pol_Rpb1_1, RNA_pol_Rpb1_5, RNA_pol_Rpb1_4	Polr3a
ENSMUSG00000025283	IPR000182	GNAT_dom	Sat1
ENSMUSG00000025323	IPR007087, IPR015880	Znf_C2H2, Znf_C2H2-like	Sp4
ENSMUSG00000025332	IPR001606, IPR001965, IPR004198, IPR013637	ARID_dom, Znf_PHD, Znf_C5HC2, Lys_sp_deMease_like_dom	Kdm5c
ENSMUSG00000025369	IPR000953, IPR001005, IPR009057	Chromo/shadow_dom, SANT/Myb, Homeodomain-like	Smarcc2
ENSMUSG00000025407	IPR007087, IPR015880	Znf_C2H2, Znf_C2H2-like	Gli1
ENSMUSG00000025408	IPR004827	bZIP	Ddit3
ENSMUSG00000025409	IPR001739, IPR016177	Methyl_CpG_DNA-bd, DNA-bd_dom	Mbd6
ENSMUSG00000025423	IPR004181	Znf_MIZ	Pias2
ENSMUSG00000025469	IPR000047, IPR001356, IPR009057	HTH_motif, Homeobox_dom, Homeodomain-like	Msx3
ENSMUSG00000025470	IPR007087, IPR015880	Znf_C2H2, Znf_C2H2-like	Zfp511
ENSMUSG00000025486	IPR003000	Sirtuin	Sirt3
ENSMUSG00000025498	IPR001346, IPR008984	Interferon_reg_fact_DNA-bd_dom, SMAD_FHA_domain	Irf7
ENSMUSG00000025527	IPR000182	GNAT_dom	Satl1
ENSMUSG00000025529	IPR006794, IPR007087, IPR015880	Transcrp_activ_Zfx/Zfy-dom, Znf_C2H2, Znf_C2H2-like	Zfp711
ENSMUSG00000025532	IPR006590	RNA_pol_II_Rpb4_core	Crcp
ENSMUSG00000025577	IPR000953, IPR016197	Chromo/shadow_dom, Chromodomain-like	Cbx2
ENSMUSG00000025578	IPR000953, IPR016197	Chromo/shadow_dom, Chromodomain-like	Cbx8
ENSMUSG00000025592	IPR009061	DNA-bd_dom_put	Dach2
ENSMUSG00000025597	IPR013069	BTB_POZ	Klhl4
ENSMUSG00000025602	IPR001909, IPR003309, IPR007087, IPR015880	Krueppel-associated_box, Tscrpt_reg_SCAN, Znf_C2H2, Znf_C2H2-like	Zfp202
ENSMUSG00000025612	IPR004826, IPR004827, IPR008917, IPR013069	bZIP_Maf, bZIP, TF_DNA-bd, BTB_POZ	Bach1
ENSMUSG00000025626	IPR001965	Znf_PHD	Phf6
ENSMUSG00000025764	IPR001965	Znf_PHD	Jade1
ENSMUSG00000025782	IPR001965	Znf_PHD	Taf3
ENSMUSG00000025786	IPR001594	Znf_DHHC_palmitoyltrfase	Zdhhc3
ENSMUSG00000025821	IPR001909, IPR007087, IPR015880	Krueppel-associated_box, Znf_C2H2, Znf_C2H2-like	Zfp282
ENSMUSG00000025880	IPR001132, IPR003619, IPR008984, IPR013019	SMAD_dom_Dwarfin-type, MAD_homology1_Dwarfin-type, SMAD_FHA_domain, MAD_homology_MH1	Smad7
ENSMUSG00000025893	IPR013069	BTB_POZ	Kbtbd3
ENSMUSG00000025902	IPR009071	HMG_box_dom	Sox17
ENSMUSG00000025912	IPR001005, IPR009057	SANT/Myb, Homeodomain-like	Mybl1
ENSMUSG00000025925	IPR001005, IPR009057	SANT/Myb, Homeodomain-like	Terf1
ENSMUSG00000025927	IPR008122, IPR013854	TF_AP2_beta, TF_AP2_C	Tfap2b
ENSMUSG00000025930	IPR011598	bHLH_dom	Msc
ENSMUSG00000025958	IPR001630, IPR004827	Leuzip_CREB, bZIP	Creb1
ENSMUSG00000025959	IPR007087, IPR015880	Znf_C2H2, Znf_C2H2-like	Klf7
ENSMUSG00000025997	IPR007087, IPR015880	Znf_C2H2, Znf_C2H2-like	Ikzf2
ENSMUSG00000026024	IPR000408	Reg_chr_condens	Als2
ENSMUSG00000026077	IPR001067, IPR011598	Nuc_translocat, bHLH_dom	Npas2
ENSMUSG00000026098	IPR009071	HMG_box_dom	Pms1
ENSMUSG00000026104	IPR008967, IPR013801, IPR015988	p53-like_TF_DNA-bd, STAT_TF_DNA-bd, STAT_TF_coiled-coil	Stat1
ENSMUSG00000026135	IPR007087, IPR015880	Znf_C2H2, Znf_C2H2-like	Zfp142
ENSMUSG00000026199	IPR007087	Znf_C2H2	Ankzf1
ENSMUSG00000026208	IPR006821	Intermed_filament_DNA-bd	Des
ENSMUSG00000026222	IPR000770, IPR010919	SAND_dom, SAND_dom-like	Sp100
ENSMUSG00000026245	IPR009061	DNA-bd_dom_put	Farsb
ENSMUSG00000026273	IPR003690	MTERF	Mterf4
ENSMUSG00000026279	IPR006612	Znf_C2CH	Thap4
ENSMUSG00000026283	IPR001965	Znf_PHD	Ing5
ENSMUSG00000026308	IPR013069	BTB_POZ	Klhl30
ENSMUSG00000026313	IPR000286, IPR017320	His_deacetylse, Histone_deAcase_II_euk	Hdac4
ENSMUSG00000026374	IPR002848	Translin	Tsn
ENSMUSG00000026380	IPR007604	CP2	Tfcp2l1
ENSMUSG00000026398	IPR000536, IPR001628, IPR001723, IPR008946	Nucl_hrmn_rcpt_lig-bd_core, Znf_hrmn_rcpt, Str_hrmn_rcpt, Nucl_hormone_rcpt_ligand-bd	Nr5a2
ENSMUSG00000026404	IPR007529	Znf_HIT	Ddx59
ENSMUSG00000026436	IPR000418	Ets_dom	Elk4
ENSMUSG00000026455	IPR013069	BTB_POZ	Klhl12
ENSMUSG00000026459	IPR002546, IPR011598	Basic, bHLH_dom	Myog
ENSMUSG00000026468	IPR001356, IPR009057	Homeobox_dom, Homeodomain-like	Lhx4
ENSMUSG00000026497	IPR001356, IPR009057	Homeobox_dom, Homeodomain-like	Mixl1
ENSMUSG00000026565	IPR000327, IPR000972, IPR001356, IPR009057, IPR010982, IPR013847	POU_specific, TF_octamer, Homeobox_dom, Homeodomain-like, Lambda_DNA-bd_dom, POU	Pou2f1
ENSMUSG00000026572	IPR001699, IPR002070, IPR008967	TF_T-box, TF_Brachyury, p53-like_TF_DNA-bd	Tbx19
ENSMUSG00000026586	IPR001356, IPR003654, IPR009057	Homeobox_dom, OAR_dom, Homeodomain-like	Prrx1
ENSMUSG00000026603	IPR001214	SET_dom	Smyd2
ENSMUSG00000026610	IPR000536, IPR001628, IPR001723, IPR003078, IPR008946	Nucl_hrmn_rcpt_lig-bd_core, Znf_hrmn_rcpt, Str_hrmn_rcpt, Retinoic_acid_rcpt, Nucl_hormone_rcpt_ligand-bd	Esrrg
ENSMUSG00000026628	IPR000837, IPR004827	AP-1, bZIP	Atf3
ENSMUSG00000026630	IPR000837, IPR004827	AP-1, bZIP	Batf3
ENSMUSG00000026638	IPR001346, IPR008984	Interferon_reg_fact_DNA-bd_dom, SMAD_FHA_domain	Irf6
ENSMUSG00000026640	IPR002909	IPT	Plxna2
ENSMUSG00000026641	IPR011598	bHLH_dom	Usf1
ENSMUSG00000026646	IPR000953, IPR001214, IPR003606, IPR003616, IPR007728, IPR011381, IPR016197	Chromo/shadow_dom, SET_dom, Pre-SET_Zn-bd_sub, Post-SET_dom, Pre-SET_dom, Histone_H3-K9_MeTrfase, Chromodomain-like	Suv39h2
ENSMUSG00000026663	IPR004827	bZIP	Atf6
ENSMUSG00000026686	IPR001356, IPR009057	Homeobox_dom, Homeodomain-like	Lmx1a
ENSMUSG00000026705	IPR013069	BTB_POZ	Klhl20
ENSMUSG00000026723	IPR001525	C5_MeTfrase	Trdmt1
ENSMUSG00000026728	IPR006821	Intermed_filament_DNA-bd	Vim
ENSMUSG00000026735	IPR011598	bHLH_dom	Ptf1a
ENSMUSG00000026740	IPR001005, IPR009057	SANT/Myb, Homeodomain-like	Dnajc1
ENSMUSG00000026743	IPR001965	Znf_PHD	Mllt10
ENSMUSG00000026751	IPR000536, IPR001628, IPR001723, IPR008946	Nucl_hrmn_rcpt_lig-bd_core, Znf_hrmn_rcpt, Str_hrmn_rcpt, Nucl_hormone_rcpt_ligand-bd	Nr5a1
ENSMUSG00000026771	IPR013069	BTB_POZ	Spopl
ENSMUSG00000026788	IPR007087, IPR013069, IPR015880	Znf_C2H2, BTB_POZ, Znf_C2H2-like	Zbtb43
ENSMUSG00000026803	IPR001005	SANT/Myb	Ttf1
ENSMUSG00000026805	IPR001356, IPR009057	Homeobox_dom, Homeodomain-like	Barhl1
ENSMUSG00000026815	IPR007087, IPR015880	Znf_C2H2, Znf_C2H2-like	Gfi1b
ENSMUSG00000026826	IPR000536, IPR001628, IPR001723, IPR003070, IPR003073, IPR008946	Nucl_hrmn_rcpt_lig-bd_core, Znf_hrmn_rcpt, Str_hrmn_rcpt, Nuc_orph_rcpt, NURR_rcpt, Nucl_hormone_rcpt_ligand-bd	Nr4a2
ENSMUSG00000026872	IPR001356, IPR007087, IPR009057, IPR015880	Homeobox_dom, Znf_C2H2, Homeodomain-like, Znf_C2H2-like	Zeb2
ENSMUSG00000026873	IPR001965	Znf_PHD	Phf19
ENSMUSG00000026890	IPR001356, IPR009057	Homeobox_dom, Homeodomain-like	Lhx6
ENSMUSG00000026932	IPR013069	BTB_POZ	Nacc2
ENSMUSG00000026934	IPR001356, IPR009057	Homeobox_dom, Homeodomain-like	Lhx3
ENSMUSG00000026976	IPR001523, IPR009057	Paired_dom, Homeodomain-like	Pax8
ENSMUSG00000026987	IPR001739, IPR001965, IPR004022, IPR016177	Methyl_CpG_DNA-bd, Znf_PHD, DDT_dom, DNA-bd_dom	Baz2b
ENSMUSG00000027016	IPR007087, IPR015880	Znf_C2H2, Znf_C2H2-like	Zfp385b
ENSMUSG00000027035	IPR001356, IPR009057	Homeobox_dom, Homeodomain-like	Cers6
ENSMUSG00000027067	IPR000969, IPR009071, IPR013719	SSrcognition, HMG_box_dom, DUF1747	Ssrp1
ENSMUSG00000027091	IPR000571	Znf_CCCH	Zc3h15
ENSMUSG00000027102	IPR001356, IPR001827, IPR009057	Homeobox_dom, Homeobox_Antennapedia_CS, Homeodomain-like	Hoxd8
ENSMUSG00000027104	IPR004827, IPR007087, IPR016378	bZIP, Znf_C2H2, TF_CRE-BP1-typ	Atf2
ENSMUSG00000027109	IPR007087, IPR015880	Znf_C2H2, Znf_C2H2-like	Sp3
ENSMUSG00000027166	IPR007872	Znf_DHP	Dnajc24
ENSMUSG00000027167	IPR008728	Elongator_complex_protein_4	Elp4
ENSMUSG00000027168	IPR001356, IPR001523, IPR009057	Homeobox_dom, Paired_dom, Homeodomain-like	Pax6
ENSMUSG00000027185	IPR000182	GNAT_dom	Nat10
ENSMUSG00000027186	IPR000418, IPR003118	Ets_dom, Pointed_dom	Elf5
ENSMUSG00000027210	IPR001356, IPR008422, IPR009057	Homeobox_dom, Homeobox_KN_domain, Homeodomain-like	Meis2
ENSMUSG00000027230	IPR001630, IPR004827	Leuzip_CREB, bZIP	Creb3l1
ENSMUSG00000027288	IPR007087, IPR015880	Znf_C2H2, Znf_C2H2-like	Zfp106
ENSMUSG00000027304	IPR004343	Plus-3	Rtf1
ENSMUSG00000027323	IPR010995	DNA_repair_Rad51/TF_NusA_a-hlx	Rad51
ENSMUSG00000027364	IPR000268	RNAP_N/Rpb10	Usp50
ENSMUSG00000027387	IPR000571	Znf_CCCH	Zc3h8
ENSMUSG00000027395	IPR007120, IPR007121, IPR007641, IPR007642, IPR007644, IPR007645	DNA-dir_RNA_pol_su2_6, RNA_pol_bsu_CS, RNA_pol_Rpb2_7, RNA_pol_Rpb2_2, RNA_pol_bsu_protrusion, RNA_pol_Rpb2_3	Polr1b
ENSMUSG00000027425	IPR000182	GNAT_dom	Csrp2bp
ENSMUSG00000027427	IPR007832	RNA_pol_Rpc34	Polr3f
ENSMUSG00000027434	IPR001356, IPR009057	Homeobox_dom, Homeodomain-like	Nkx2-2
ENSMUSG00000027439	IPR007087, IPR013069, IPR015880	Znf_C2H2, BTB_POZ, Znf_C2H2-like	Gzf1
ENSMUSG00000027478	IPR001525	C5_MeTfrase	Dnmt3b
ENSMUSG00000027490	IPR003316	E2F_WHTH_DNA-bd_dom	E2f1
ENSMUSG00000027525	IPR004018	RPEL_repeat	Phactr3
ENSMUSG00000027544	IPR002909, IPR008366, IPR008967, IPR011539	IPT, NFAT, p53-like_TF_DNA-bd, RHD	Nfatc2
ENSMUSG00000027547	IPR007087, IPR015880	Znf_C2H2, Znf_C2H2-like	Sall4
ENSMUSG00000027551	IPR007087, IPR015880	Znf_C2H2, Znf_C2H2-like	Zfp64
ENSMUSG00000027552	IPR003316	E2F_WHTH_DNA-bd_dom	E2f5
ENSMUSG00000027569	IPR012423	Eaf7/MRGBP	Mrgbp
ENSMUSG00000027582	IPR000571	Znf_CCCH	Zgpat
ENSMUSG00000027583	IPR007087, IPR013069, IPR015880	Znf_C2H2, BTB_POZ, Znf_C2H2-like	Zbtb46
ENSMUSG00000027660	IPR009061, IPR010919	DNA-bd_dom_put, SAND_dom-like	Skil
ENSMUSG00000027663	IPR015880	Znf_C2H2-like	Zmat3
ENSMUSG00000027667	IPR007087, IPR015880	Znf_C2H2, Znf_C2H2-like	Zfp639
ENSMUSG00000027678	IPR009110, IPR011598, IPR014920, IPR017426	Nuc_rcpt_coact, bHLH_dom, Nuc_rcpt_coact_Ncoa-typ, Nuclear_rcpt_coactivator	Ncoa3
ENSMUSG00000027684	IPR001214, IPR007087, IPR015880	SET_dom, Znf_C2H2, Znf_C2H2-like	Mecom
ENSMUSG00000027763	IPR000571	Znf_CCCH	Mbnl1
ENSMUSG00000027794	IPR011598	bHLH_dom	Sohlh2
ENSMUSG00000027796	IPR001132, IPR003619, IPR008984, IPR013019	SMAD_dom_Dwarfin-type, MAD_homology1_Dwarfin-type, SMAD_FHA_domain, MAD_homology_MH1	Smad9
ENSMUSG00000027806	IPR000580	TSC-22_Dip_Bun	Tsc22d2
ENSMUSG00000027833	IPR000047, IPR001356, IPR003654, IPR009057	HTH_motif, Homeobox_dom, OAR_dom, Homeodomain-like	Shox2
ENSMUSG00000027868	IPR001699, IPR002070, IPR008967	TF_T-box, TF_Brachyury, p53-like_TF_DNA-bd	Tbx15
ENSMUSG00000027938	IPR004827	bZIP	Creb3l4
ENSMUSG00000027967	IPR011598	bHLH_dom	Neurog2
ENSMUSG00000027985	IPR009071, IPR013558	HMG_box_dom, CTNNB1-bd_N	Lef1
ENSMUSG00000028016	IPR001965	Znf_PHD	Ints12
ENSMUSG00000028023	IPR001356, IPR003654, IPR009057, IPR016233	Homeobox_dom, OAR_dom, Homeodomain-like, Homeobox_Pitx/unc30	Pitx2
ENSMUSG00000028042	IPR007087, IPR013069, IPR015880	Znf_C2H2, BTB_POZ, Znf_C2H2-like	Zbtb7b
ENSMUSG00000028053	IPR001025, IPR001214, IPR001965, IPR003616, IPR006560	BAH_dom, SET_dom, Znf_PHD, Post-SET_dom, AWS_dom	Ash1l
ENSMUSG00000028089	IPR000330	SNF2_N	Chd1l
ENSMUSG00000028099	IPR008806	RNA_pol_III_Rpc82_C	Polr3c
ENSMUSG00000028101	IPR004181	Znf_MIZ	Pias3
ENSMUSG00000028150	IPR000536, IPR001628, IPR001723, IPR003079, IPR008946	Nucl_hrmn_rcpt_lig-bd_core, Znf_hrmn_rcpt, Str_hrmn_rcpt, ROR_rcpt, Nucl_hormone_rcpt_ligand-bd	Rorc
ENSMUSG00000028163	IPR000451, IPR002909, IPR008967, IPR011539	NFkB/Dor, IPT, p53-like_TF_DNA-bd, RHD	Nfkb1
ENSMUSG00000028224	IPR008984	SMAD_FHA_domain	Nbn
ENSMUSG00000028271	IPR000812, IPR013137	TFIIB, Znf_TFIIB	Gtf2b
ENSMUSG00000028318	IPR009668	RNA_pol-assoc_fac_A49-like	Polr1e
ENSMUSG00000028329	IPR000465, IPR009061	XPA, DNA-bd_dom_put	Xpa
ENSMUSG00000028341	IPR000536, IPR001628, IPR001723, IPR003070, IPR003072, IPR008946	Nucl_hrmn_rcpt_lig-bd_core, Znf_hrmn_rcpt, Str_hrmn_rcpt, Nuc_orph_rcpt, NOR1_rcpt, Nucl_hormone_rcpt_ligand-bd	Nr4a3
ENSMUSG00000028358	IPR007087, IPR015880	Znf_C2H2, Znf_C2H2-like	Zfp618
ENSMUSG00000028389	IPR001909, IPR007087, IPR015880	Krueppel-associated_box, Znf_C2H2, Znf_C2H2-like	Zfp37
ENSMUSG00000028394	IPR003958	CBFA_NFYB_domain	Pole3
ENSMUSG00000028397	IPR001965	Znf_PHD	Kdm4c
ENSMUSG00000028403	IPR001594	Znf_DHHC_palmitoyltrfase	Zdhhc21
ENSMUSG00000028411	IPR007087, IPR008984	Znf_C2H2, SMAD_FHA_domain	Aptx
ENSMUSG00000028417	IPR011598	bHLH_dom	Tal2
ENSMUSG00000028423	IPR000967	Znf_NFX1	Nfx1
ENSMUSG00000028466	IPR004827, IPR008917	bZIP, TF_DNA-bd	Creb3
ENSMUSG00000028487	IPR007087, IPR015880	Znf_C2H2, Znf_C2H2-like	Bnc2
ENSMUSG00000028496	IPR005033	YEATS	Mllt3
ENSMUSG00000028522	IPR000949, IPR001005, IPR009057	ELM2_dom, SANT/Myb, Homeodomain-like	Mier1
ENSMUSG00000028565	IPR000647, IPR003619	CTF/NFI, MAD_homology1_Dwarfin-type	Nfia
ENSMUSG00000028587	IPR001025	BAH_dom	Orc1
ENSMUSG00000028610	IPR001275	DM_DNA-bd	Dmrtb1
ENSMUSG00000028634	IPR007087, IPR015880	Znf_C2H2, Znf_C2H2-like	Hivep3
ENSMUSG00000028639	IPR002059, IPR011129	CSP_DNA-bd, Cold_shock_prot	Ybx1
ENSMUSG00000028640	IPR008123, IPR013854	TF_AP2_gamma, TF_AP2_C	Tfap2c
ENSMUSG00000028654	IPR002418, IPR011598, IPR012682	Tscrpt_reg_Myc, bHLH_dom, Tscrpt_reg_Myc_N	Mycl
ENSMUSG00000028668	IPR010684	RNA_pol_II_trans_fac_SIII_A	Tceb3
ENSMUSG00000028688	IPR000571	Znf_CCCH	Toe1
ENSMUSG00000028696	IPR013069	BTB_POZ	Ipp
ENSMUSG00000028702	IPR000330	SNF2_N	Rad54l
ENSMUSG00000028707	IPR001356, IPR003654, IPR009057	Homeobox_dom, OAR_dom, Homeodomain-like	Dmbx1
ENSMUSG00000028717	IPR011598	bHLH_dom	Tal1
ENSMUSG00000028736	IPR001356, IPR001523, IPR009057	Homeobox_dom, Paired_dom, Homeodomain-like	Pax7
ENSMUSG00000028799	IPR007087, IPR015880	Znf_C2H2, Znf_C2H2-like	Zfp362
ENSMUSG00000028800	IPR000286, IPR003084	His_deacetylse, His_deacetylse_1	Hdac1
ENSMUSG00000028807	IPR007087, IPR013069, IPR015880	Znf_C2H2, BTB_POZ, Znf_C2H2-like	Zbtb8a
ENSMUSG00000028840	IPR007087	Znf_C2H2	Zfp593
ENSMUSG00000028863	IPR015418	Hist_AcTrfase_NuA4_cplx	Meaf6
ENSMUSG00000028882	IPR008984	SMAD_FHA_domain	Ppp1r8
ENSMUSG00000028890	IPR007087, IPR015880	Znf_C2H2, Znf_C2H2-like	Mtf1
ENSMUSG00000028896	IPR000408	Reg_chr_condens	Rcc1
ENSMUSG00000028901	IPR000770, IPR010919	SAND_dom, SAND_dom-like	Gmeb1
ENSMUSG00000028940	IPR003650, IPR011598	Orange, bHLH_dom	Hes2
ENSMUSG00000028946	IPR003650, IPR011598	Orange, bHLH_dom	Hes3
ENSMUSG00000028952	IPR007087, IPR013069, IPR015880	Znf_C2H2, BTB_POZ, Znf_C2H2-like	Zbtb48
ENSMUSG00000028977	IPR007087, IPR015880	Znf_C2H2, Znf_C2H2-like	Casz1
ENSMUSG00000028986	IPR013069	BTB_POZ	Klhl7
ENSMUSG00000029004	IPR001214, IPR001965	SET_dom, Znf_PHD	Kmt2e
ENSMUSG00000029014	IPR001005, IPR009057	SANT/Myb, Homeodomain-like	Dnajc2
ENSMUSG00000029026	IPR002117, IPR008967, IPR011615	p53_tumour_suppressor, p53-like_TF_DNA-bd, p53_DNA-bd	Trp73
ENSMUSG00000029050	IPR009061, IPR010919	DNA-bd_dom_put, SAND_dom-like	Ski
ENSMUSG00000029097	IPR000571	Znf_CCCH	Trmt44
ENSMUSG00000029112	IPR001356, IPR009057	Homeobox_dom, Homeodomain-like	Nkx1-1
ENSMUSG00000029127	IPR007087, IPR013069, IPR015880	Znf_C2H2, BTB_POZ, Znf_C2H2-like	Zbtb49
ENSMUSG00000029135	IPR000837, IPR004827	AP-1, bZIP	Fosl2
ENSMUSG00000029141	IPR008984	SMAD_FHA_domain	Slc4a1ap
ENSMUSG00000029178	IPR007087, IPR015880	Znf_C2H2, Znf_C2H2-like	Klf3
ENSMUSG00000029179	IPR001594, IPR002052, IPR010666	Znf_DHHC_palmitoyltrfase, DNA_methylase_N6_adenine_CS, Znf_GRF	Zcchc4
ENSMUSG00000029196	IPR001005, IPR009057, IPR016827	SANT/Myb, Homeodomain-like, Ada2/TADA2	Tada2b
ENSMUSG00000029221	IPR009061	DNA-bd_dom_put	Slc30a9
ENSMUSG00000029238	IPR001067, IPR011598	Nuc_translocat, bHLH_dom	Clock
ENSMUSG00000029249	IPR007087, IPR015880	Znf_C2H2, Znf_C2H2-like	Rest
ENSMUSG00000029250	IPR007120, IPR007121, IPR007641, IPR007642, IPR007644, IPR007645, IPR007646, IPR007647	DNA-dir_RNA_pol_su2_6, RNA_pol_bsu_CS, RNA_pol_Rpb2_7, RNA_pol_Rpb2_2, RNA_pol_bsu_protrusion, RNA_pol_Rpb2_3, RNA_pol_Rpb2_4, RNA_pol_Rpb2_5	Polr2b
ENSMUSG00000029265	IPR003958	CBFA_NFYB_domain	Dr1
ENSMUSG00000029267	IPR001965	Znf_PHD	Mtf2
ENSMUSG00000029275	IPR007087, IPR015880	Znf_C2H2, Znf_C2H2-like	Gfi1
ENSMUSG00000029312	IPR013069	BTB_POZ	Klhl8
ENSMUSG00000029313	IPR007797	TF_AF4/FMR2	Aff1
ENSMUSG00000029387	IPR004600	TFIIH_Tfb4/p34	Gtf2h3
ENSMUSG00000029475	IPR001965, IPR002857	Znf_PHD, Znf_CXXC	Kdm2b
ENSMUSG00000029478	IPR001005, IPR009057	SANT/Myb, Homeodomain-like	Ncor2
ENSMUSG00000029505	IPR000330	SNF2_N	Ep400
ENSMUSG00000029521	IPR008984	SMAD_FHA_domain	Chek2
ENSMUSG00000029524	IPR003000	Sirtuin	Sirt4
ENSMUSG00000029546	IPR001356, IPR009057	Homeobox_dom, Homeodomain-like	Uncx
ENSMUSG00000029553	IPR011598	bHLH_dom	Tfec
ENSMUSG00000029556	IPR001356, IPR009057, IPR010982	Homeobox_dom, Homeodomain-like, Lambda_DNA-bd_dom	Hnf1a
ENSMUSG00000029563	IPR001766	TF_fork_head	Foxp2
ENSMUSG00000029576	IPR008984	SMAD_FHA_domain	Radil
ENSMUSG00000029587	IPR001909, IPR007087, IPR015880	Krueppel-associated_box, Znf_C2H2, Znf_C2H2-like	Zfp12
ENSMUSG00000029595	IPR001356, IPR009057	Homeobox_dom, Homeodomain-like	Lhx5
ENSMUSG00000029625	IPR000571	Znf_CCCH	Cpsf4
ENSMUSG00000029627	IPR001909, IPR003309, IPR007087, IPR015880	Krueppel-associated_box, Tscrpt_reg_SCAN, Znf_C2H2, Znf_C2H2-like	Zkscan14
ENSMUSG00000029629	IPR001965	Znf_PHD	Phf14
ENSMUSG00000029642	IPR008193, IPR009025	RNA_pol_Rpb11_13-16kDa_CS, RBP11-like_dimer	Polr1d
ENSMUSG00000029644	IPR001356, IPR009057	Homeobox_dom, Homeodomain-like	Pdx1
ENSMUSG00000029646	IPR000047, IPR001356, IPR009057	HTH_motif, Homeobox_dom, Homeodomain-like	Cdx2
ENSMUSG00000029647	IPR000571	Znf_CCCH	Pan3
ENSMUSG00000029670	IPR001965	Znf_PHD	Ing3
ENSMUSG00000029687	IPR001005, IPR001214	SANT/Myb, SET_dom	Ezh2
ENSMUSG00000029697	IPR007087, IPR015880	Znf_C2H2, Znf_C2H2-like	Fezf1
ENSMUSG00000029705	IPR001356, IPR003350, IPR009057, IPR010982	Homeobox_dom, CUT_dom, Homeodomain-like, Lambda_DNA-bd_dom	Cux1
ENSMUSG00000029706	IPR001356, IPR001523, IPR009057	Homeobox_dom, Paired_dom, Homeodomain-like	Pax4
ENSMUSG00000029723	IPR000580	TSC-22_Dip_Bun	Tsc22d4
ENSMUSG00000029729	IPR001909, IPR003309, IPR007087, IPR015880	Krueppel-associated_box, Tscrpt_reg_SCAN, Znf_C2H2, Znf_C2H2-like	Zkscan1
ENSMUSG00000029736	IPR001356, IPR009057	Homeobox_dom, Homeodomain-like	Nobox
ENSMUSG00000029754	IPR000047, IPR001356, IPR009057	HTH_motif, Homeobox_dom, Homeodomain-like	Dlx6
ENSMUSG00000029755	IPR000047, IPR001356, IPR009057	HTH_motif, Homeobox_dom, Homeodomain-like	Dlx5
ENSMUSG00000029765	IPR002909	IPT	Plxna4
ENSMUSG00000029771	IPR001346, IPR008984	Interferon_reg_fact_DNA-bd_dom, SMAD_FHA_domain	Irf5
ENSMUSG00000029798	IPR000408	Reg_chr_condens	Herc6
ENSMUSG00000029804	IPR000408	Reg_chr_condens	Herc3
ENSMUSG00000029826	IPR000571	Znf_CCCH	Zc3hav1
ENSMUSG00000029832	IPR004826, IPR004827, IPR008917	bZIP_Maf, bZIP, TF_DNA-bd	Nfe2l3
ENSMUSG00000029833	IPR001965	Znf_PHD	Trim24
ENSMUSG00000029836	IPR000953, IPR008251, IPR016197	Chromo/shadow_dom, Chromo_shadow_dom, Chromodomain-like	Cbx3
ENSMUSG00000029844	IPR001356, IPR009057	Homeobox_dom, Homeodomain-like	Hoxa1
ENSMUSG00000029913	IPR001214, IPR007087, IPR015880, IPR017125	SET_dom, Znf_C2H2, Znf_C2H2-like, Znf_PRDM5	Prdm5
ENSMUSG00000029920	IPR000330	SNF2_N	Smarcad1
ENSMUSG00000029922	IPR000571	Znf_CCCH	Mkrn1
ENSMUSG00000030001	IPR011598	bHLH_dom	Figla
ENSMUSG00000030004	IPR000182	GNAT_dom	Nat8
ENSMUSG00000030016	IPR007087, IPR015880	Znf_C2H2, Znf_C2H2-like	Zfp638
ENSMUSG00000030031	IPR013069	BTB_POZ	Kbtbd8
ENSMUSG00000030034	IPR007529	Znf_HIT	Ino80b
ENSMUSG00000030042	IPR003958	CBFA_NFYB_domain	Pole4
ENSMUSG00000030051	IPR008984	SMAD_FHA_domain	Aplf
ENSMUSG00000030067	IPR001766	TF_fork_head	Foxp1
ENSMUSG00000030083	IPR013069	BTB_POZ	Abtb1
ENSMUSG00000030084	IPR002909	IPT	Plxna1
ENSMUSG00000030087	IPR007087, IPR015880	Znf_C2H2, Znf_C2H2-like	Klf15
ENSMUSG00000030103	IPR003650, IPR011598	Orange, bHLH_dom	Bhlhe40
ENSMUSG00000030123	IPR002909	IPT	Plxnd1
ENSMUSG00000030145	IPR001909, IPR007087, IPR015880	Krueppel-associated_box, Znf_C2H2, Znf_C2H2-like	Zfp248
ENSMUSG00000030180	IPR001606, IPR001965, IPR004198, IPR013637	ARID_dom, Znf_PHD, Znf_C5HC2, Lys_sp_deMease_like_dom	Kdm5a
ENSMUSG00000030189	IPR002059, IPR011129	CSP_DNA-bd, Cold_shock_prot	Ybx3
ENSMUSG00000030199	IPR000418, IPR003118	Ets_dom, Pointed_dom	Etv6
ENSMUSG00000030232	IPR007087, IPR015880	Znf_C2H2, Znf_C2H2-like	Aebp2
ENSMUSG00000030254	IPR006642	Znf_Rad18_put	Rad18
ENSMUSG00000030256	IPR003650, IPR011598	Orange, bHLH_dom	Bhlhe41
ENSMUSG00000030322	IPR001739, IPR016177, IPR017352	Methyl_CpG_DNA-bd, DNA-bd_dom, MBD4	Mbd4
ENSMUSG00000030330	IPR001965	Znf_PHD	Ing4
ENSMUSG00000030353	IPR000818, IPR016361	TEA/ATTS, TEF_metazoa	Tead4
ENSMUSG00000030380	IPR003309, IPR007087, IPR015880	Tscrpt_reg_SCAN, Znf_C2H2, Znf_C2H2-like	Mzf1
ENSMUSG00000030386	IPR001909, IPR007087, IPR015880	Krueppel-associated_box, Znf_C2H2, Znf_C2H2-like	Zfp606
ENSMUSG00000030393	IPR001909, IPR007087, IPR015880	Krueppel-associated_box, Znf_C2H2, Znf_C2H2-like	Zik1
ENSMUSG00000030443	IPR001909, IPR007087, IPR015880	Krueppel-associated_box, Znf_C2H2, Znf_C2H2-like	Zfp583
ENSMUSG00000030446	IPR001909, IPR007087, IPR015880	Krueppel-associated_box, Znf_C2H2, Znf_C2H2-like	Zfp273
ENSMUSG00000030451	IPR000408	Reg_chr_condens	Herc2
ENSMUSG00000030469	IPR001909, IPR007087, IPR015880	Krueppel-associated_box, Znf_C2H2, Znf_C2H2-like	Zfp719
ENSMUSG00000030471	IPR001594	Znf_DHHC_palmitoyltrfase	Zdhhc13
ENSMUSG00000030486	IPR001909, IPR007087, IPR015880	Krueppel-associated_box, Znf_C2H2, Znf_C2H2-like	Zfp108
ENSMUSG00000030507	IPR000047, IPR001356, IPR009057	HTH_motif, Homeobox_dom, Homeodomain-like	Dbx1
ENSMUSG00000030510	IPR001356, IPR009057	Homeobox_dom, Homeodomain-like	Cers3
ENSMUSG00000030543	IPR011598	bHLH_dom	Mesp2
ENSMUSG00000030544	IPR011598	bHLH_dom	Mesp1
ENSMUSG00000030551	IPR000536, IPR001628, IPR001723, IPR003068, IPR008946	Nucl_hrmn_rcpt_lig-bd_core, Znf_hrmn_rcpt, Str_hrmn_rcpt, COUP_TF, Nucl_hormone_rcpt_ligand-bd	Nr2f2
ENSMUSG00000030557	IPR002100	TF_MADSbox	Mef2a
ENSMUSG00000030584	IPR001965, IPR007087, IPR015880	Znf_PHD, Znf_C2H2, Znf_C2H2-like	Dpf1
ENSMUSG00000030604	IPR007087, IPR015880	Znf_C2H2, Znf_C2H2-like	Zfp626
ENSMUSG00000030678	IPR007087, IPR015880	Znf_C2H2, Znf_C2H2-like	Maz
ENSMUSG00000030699	IPR001699, IPR002070, IPR008967	TF_T-box, TF_Brachyury, p53-like_TF_DNA-bd	Tbx6
ENSMUSG00000030753	IPR006612	Znf_C2CH	Prkrir
ENSMUSG00000030757	IPR001909, IPR003309, IPR007087, IPR015880	Krueppel-associated_box, Tscrpt_reg_SCAN, Znf_C2H2, Znf_C2H2-like	Zkscan2
ENSMUSG00000030796	IPR000818, IPR016361	TEA/ATTS, TEF_metazoa	Tead2
ENSMUSG00000030801	IPR000953, IPR016197	Chromo/shadow_dom, Chromodomain-like	Kat8
ENSMUSG00000030811	IPR001965, IPR002857	Znf_PHD, Znf_CXXC	Fbxl19
ENSMUSG00000030823	IPR001909, IPR007087, IPR015880	Krueppel-associated_box, Znf_C2H2, Znf_C2H2-like	9130019O22Rik
ENSMUSG00000030839	IPR000408	Reg_chr_condens	Sergef
ENSMUSG00000030929	IPR010666	Znf_GRF	Eri2
ENSMUSG00000031004	IPR008984	SMAD_FHA_domain	Mki67
ENSMUSG00000031026	IPR001965	Znf_PHD	Trim66
ENSMUSG00000031028	IPR000007	Tubby_C	Tub
ENSMUSG00000031060	IPR007087	Znf_C2H2	Rbm10
ENSMUSG00000031079	IPR001909, IPR007087, IPR015880	Krueppel-associated_box, Znf_C2H2, Znf_C2H2-like	Zfp300
ENSMUSG00000031099	IPR000330, IPR001005, IPR009057, IPR015194, IPR015195	SNF2_N, SANT/Myb, Homeodomain-like, ISWI_HAND-dom, SLIDE	Smarca1
ENSMUSG00000031103	IPR000418	Ets_dom	Elf4
ENSMUSG00000031131	IPR011520	Vg_Tdu	Vgll1
ENSMUSG00000031161	IPR000286	His_deacetylse	Hdac6
ENSMUSG00000031162	IPR000679, IPR016374	Znf_GATA, TF_GATA-2/3	Gata1
ENSMUSG00000031174	IPR000408	Reg_chr_condens	Rpgr
ENSMUSG00000031189	IPR007797	TF_AF4/FMR2	Aff2
ENSMUSG00000031229	IPR000330	SNF2_N	Atrx
ENSMUSG00000031241	IPR001699, IPR008967	TF_T-box, p53-like_TF_DNA-bd	Tbx22
ENSMUSG00000031245	IPR000079	HMGN_fam	Hmgn5
ENSMUSG00000031310	IPR010507	Znf_MYM	Zmym3
ENSMUSG00000031314	IPR011177	TAF1_animal	Taf1
ENSMUSG00000031326	IPR000047, IPR001356, IPR009057	HTH_motif, Homeobox_dom, Homeodomain-like	Cdx4
ENSMUSG00000031358	IPR000953, IPR016197	Chromo/shadow_dom, Chromodomain-like	Msl3
ENSMUSG00000031365	IPR007087, IPR015880	Znf_C2H2, Znf_C2H2-like	Zfp275
ENSMUSG00000031370	IPR000571	Znf_CCCH	Zrsr2
ENSMUSG00000031374	IPR001909, IPR007087, IPR015880	Krueppel-associated_box, Znf_C2H2, Znf_C2H2-like	Zfp92
ENSMUSG00000031385	IPR002909	IPT	Plxnb3
ENSMUSG00000031388	IPR000182	GNAT_dom	Naa10
ENSMUSG00000031393	IPR001739, IPR016177, IPR017353	Methyl_CpG_DNA-bd, DNA-bd_dom, Me_CpG-bd_MeCP2	Mecp2
ENSMUSG00000031398	IPR002909	IPT	Plxna3
ENSMUSG00000031431	IPR000580	TSC-22_Dip_Bun	Tsc22d3
ENSMUSG00000031434	IPR011124	Znf_CW	Morc4
ENSMUSG00000031487	IPR013137	Znf_TFIIB	Brf2
ENSMUSG00000031540	IPR001965	Znf_PHD	Kat6a
ENSMUSG00000031605	IPR013069	BTB_POZ	Klhl2
ENSMUSG00000031618	IPR000536, IPR001628, IPR008946	Nucl_hrmn_rcpt_lig-bd_core, Znf_hrmn_rcpt, Nucl_hormone_rcpt_ligand-bd	Nr3c2
ENSMUSG00000031621	IPR001356, IPR009057	Homeobox_dom, Homeodomain-like	Isx
ENSMUSG00000031622	IPR013194	HDAC_interact	Sin3b
ENSMUSG00000031626	IPR007087	Znf_C2H2	Sorbs2
ENSMUSG00000031627	IPR001346	Interferon_reg_fact_DNA-bd_dom	Irf2
ENSMUSG00000031665	IPR007087, IPR015880	Znf_C2H2, Znf_C2H2-like	Sall1
ENSMUSG00000031671	IPR001214	SET_dom	Setd6
ENSMUSG00000031681	IPR001132, IPR003619, IPR008984, IPR013019	SMAD_dom_Dwarfin-type, MAD_homology1_Dwarfin-type, SMAD_FHA_domain, MAD_homology_MH1	Smad1
ENSMUSG00000031688	IPR000327, IPR001356, IPR009057, IPR010982, IPR013847	POU_specific, Homeobox_dom, Homeodomain-like, Lambda_DNA-bd_dom, POU	Pou4f2
ENSMUSG00000031706	IPR003150, IPR007668	DNA-bd_RFX, RFX1_trans_act	Rfx1
ENSMUSG00000031715	IPR000330, IPR001005, IPR009057, IPR015194, IPR015195	SNF2_N, SANT/Myb, Homeodomain-like, ISWI_HAND-dom, SLIDE	Smarca5
ENSMUSG00000031728	IPR007087, IPR015880	Znf_C2H2, Znf_C2H2-like	Zfp821
ENSMUSG00000031734	IPR001356, IPR003893, IPR008422, IPR009057	Homeobox_dom, Iroquois_homeo, Homeobox_KN_domain, Homeodomain-like	Irx3
ENSMUSG00000031737	IPR001356, IPR003893, IPR008422, IPR009057	Homeobox_dom, Iroquois_homeo, Homeobox_KN_domain, Homeodomain-like	Irx5
ENSMUSG00000031738	IPR001356, IPR003893, IPR008422, IPR009057	Homeobox_dom, Iroquois_homeo, Homeobox_KN_domain, Homeodomain-like	Irx6
ENSMUSG00000031758	IPR000953, IPR016197	Chromo/shadow_dom, Chromodomain-like	Cdyl2
ENSMUSG00000031783	IPR001514, IPR009025, IPR011263	DNA-dir_RNA_pol_30-40kDasu_CS, RBP11-like_dimer, DNA-dir_RNA_pol_RpoA/D/Rpb3	Polr2c
ENSMUSG00000031823	IPR001594	Znf_DHHC_palmitoyltrfase	Zdhhc7
ENSMUSG00000031828	IPR013069	BTB_POZ	Klhl36
ENSMUSG00000031860	IPR001356, IPR005542, IPR009057	Homeobox_dom, PBX, Homeodomain-like	Pbx4
ENSMUSG00000031870	IPR000536, IPR001628, IPR001723, IPR008946	Nucl_hrmn_rcpt_lig-bd_core, Znf_hrmn_rcpt, Str_hrmn_rcpt, Nucl_hormone_rcpt_ligand-bd	Pgr
ENSMUSG00000031885	IPR003417	CBF_beta	Cbfb
ENSMUSG00000031902	IPR002909, IPR008366, IPR008967, IPR011539	IPT, NFAT, p53-like_TF_DNA-bd, RHD	Nfatc3
ENSMUSG00000031907	IPR001909, IPR007087, IPR015880	Krueppel-associated_box, Znf_C2H2, Znf_C2H2-like	Zfp90
ENSMUSG00000031921	IPR001005, IPR009057	SANT/Myb, Homeodomain-like	Terf2
ENSMUSG00000031954	IPR011421	BCNT-C	Cfdp1
ENSMUSG00000031965	IPR001699, IPR008967	TF_T-box, p53-like_TF_DNA-bd	Tbx20
ENSMUSG00000031986	IPR006642	Znf_Rad18_put	Sprtn
ENSMUSG00000032015	IPR000327, IPR000972, IPR001356, IPR009057, IPR010982, IPR013847	POU_specific, TF_octamer, Homeobox_dom, Homeodomain-like, Lambda_DNA-bd_dom, POU	Pou2f3
ENSMUSG00000032033	IPR000047, IPR001356, IPR009057	HTH_motif, Homeobox_dom, Homeodomain-like	Barx2
ENSMUSG00000032035	IPR000418, IPR003118, IPR016311	Ets_dom, Pointed_dom, Transform_prot_C-ets	Ets1
ENSMUSG00000032119	IPR007087, IPR015880	Znf_C2H2, Znf_C2H2-like	Hinfp
ENSMUSG00000032187	IPR000330	SNF2_N	Smarca4
ENSMUSG00000032228	IPR011598	bHLH_dom	Tcf12
ENSMUSG00000032238	IPR000536, IPR001628, IPR001723, IPR003079, IPR008946	Nucl_hrmn_rcpt_lig-bd_core, Znf_hrmn_rcpt, Str_hrmn_rcpt, ROR_rcpt, Nucl_hormone_rcpt_ligand-bd	Rora
ENSMUSG00000032271	IPR000940	NNMT_TEMT_trans	Nnmt
ENSMUSG00000032280	IPR009146	Groucho_enhance	Tle3
ENSMUSG00000032292	IPR000536, IPR001628, IPR001723, IPR003068, IPR008946	Nucl_hrmn_rcpt_lig-bd_core, Znf_hrmn_rcpt, Str_hrmn_rcpt, COUP_TF, Nucl_hormone_rcpt_ligand-bd	Nr2e3
ENSMUSG00000032318	IPR001356, IPR009057	Homeobox_dom, Homeodomain-like	Isl2
ENSMUSG00000032329	IPR009071	HMG_box_dom	Hmg20a
ENSMUSG00000032368	IPR007087, IPR015880	Znf_C2H2, Znf_C2H2-like	Zic1
ENSMUSG00000032386	IPR009349	Znf_C2HC5	Trip4
ENSMUSG00000032402	IPR001132, IPR003619, IPR008984, IPR013019	SMAD_dom_Dwarfin-type, MAD_homology1_Dwarfin-type, SMAD_FHA_domain, MAD_homology_MH1	Smad3
ENSMUSG00000032405	IPR004181	Znf_MIZ	Pias1
ENSMUSG00000032411	IPR003316, IPR014889, IPR015648	E2F_WHTH_DNA-bd_dom, Transc_factor_DP_C, Transcrpt_fac_DP	Tfdp2
ENSMUSG00000032419	IPR001699, IPR008967	TF_T-box, p53-like_TF_DNA-bd	Tbx18
ENSMUSG00000032425	IPR001909, IPR007087, IPR015880	Krueppel-associated_box, Znf_C2H2, Znf_C2H2-like	Zfp949
ENSMUSG00000032446	IPR001699, IPR008967	TF_T-box, p53-like_TF_DNA-bd	Eomes
ENSMUSG00000032481	IPR000953, IPR001005, IPR009057	Chromo/shadow_dom, SANT/Myb, Homeodomain-like	Smarcc1
ENSMUSG00000032579	IPR002052	DNA_methylase_N6_adenine_CS	Hemk1
ENSMUSG00000032580	IPR007087	Znf_C2H2	Rbm5
ENSMUSG00000032582	IPR007087	Znf_C2H2	Rbm6
ENSMUSG00000032584	IPR002909	IPT	Mst1r
ENSMUSG00000032652	IPR004827	bZIP	Crebl2
ENSMUSG00000032724	IPR013069	BTB_POZ	Abtb2
ENSMUSG00000032727	IPR000949, IPR001005, IPR009057	ELM2_dom, SANT/Myb, Homeodomain-like	Mier3
ENSMUSG00000032744	IPR003650, IPR011598	Orange, bHLH_dom	Heyl
ENSMUSG00000032897	IPR003958	CBFA_NFYB_domain	Nfyc
ENSMUSG00000032998	IPR001766	TF_fork_head	Foxj3
ENSMUSG00000033004	IPR000408	Reg_chr_condens	Mycbp2
ENSMUSG00000033006	IPR009071	HMG_box_dom	Sox10
ENSMUSG00000033014	IPR001965	Znf_PHD	Trim33
ENSMUSG00000033016	IPR002909, IPR008366, IPR008967, IPR011539	IPT, NFAT, p53-like_TF_DNA-bd, RHD	Nfatc1
ENSMUSG00000033020	IPR006110, IPR006111	Pol_omega/K/RPB6, RpoK/Rpb6	Polr2f
ENSMUSG00000033080	IPR001356, IPR009057	Homeobox_dom, Homeodomain-like	Vsx1
ENSMUSG00000033182	IPR013069	BTB_POZ	Kbtbd12
ENSMUSG00000033222	IPR000330, IPR010666	SNF2_N, Znf_GRF	Ttf2
ENSMUSG00000033237	IPR001606, IPR003150, IPR007087	ARID_dom, DNA-bd_RFX, Znf_C2H2	Arid2
ENSMUSG00000033249	IPR000232	HSF_DNA-bd	Hsf4
ENSMUSG00000033294	IPR005612	CCAAT-binding_factor	Noc4l
ENSMUSG00000033326	IPR001965	Znf_PHD	Kdm4a
ENSMUSG00000033373	IPR009508	Transcrpt_activator_Churchill	Fntb
ENSMUSG00000033430	IPR009057	Homeodomain-like	Terf2ip
ENSMUSG00000033454	IPR007087, IPR013069, IPR015880	Znf_C2H2, BTB_POZ, Znf_C2H2-like	Zbtb1
ENSMUSG00000033634	IPR000182	GNAT_dom	Cml2
ENSMUSG00000033669	IPR001909, IPR007087, IPR015880	Krueppel-associated_box, Znf_C2H2, Znf_C2H2-like	Zfp7
ENSMUSG00000033705	IPR008984	SMAD_FHA_domain	Stard9
ENSMUSG00000033706	IPR001214	SET_dom	Smyd5
ENSMUSG00000033713	IPR001766	TF_fork_head	Foxn3
ENSMUSG00000033726	IPR001356, IPR009057	Homeobox_dom, Homeodomain-like	Emx1
ENSMUSG00000033730	IPR007087, IPR015880	Znf_C2H2, Znf_C2H2-like	Egr3
ENSMUSG00000033740	IPR002515, IPR013681	Znf_C2HC, Myelin_TF	St18
ENSMUSG00000033813	IPR001222, IPR006289, IPR016492	Znf_TFIIS, TFSII, TF_IIS-rel	Tcea1
ENSMUSG00000033837	IPR001766	TF_fork_head	Foxh1
ENSMUSG00000033863	IPR007087, IPR015880	Znf_C2H2, Znf_C2H2-like	Klf9
ENSMUSG00000033883	IPR001909, IPR007087, IPR015880	Krueppel-associated_box, Znf_C2H2, Znf_C2H2-like	D3Ertd254e
ENSMUSG00000033906	IPR001594	Znf_DHHC_palmitoyltrfase	Zdhhc15
ENSMUSG00000033943	IPR001699, IPR008967, IPR011598	TF_T-box, p53-like_TF_DNA-bd, bHLH_dom	Mga
ENSMUSG00000033961	IPR001909, IPR003309, IPR007087, IPR015880	Krueppel-associated_box, Tscrpt_reg_SCAN, Znf_C2H2, Znf_C2H2-like	Zfp446
ENSMUSG00000033964	IPR007087, IPR013069, IPR015880	Znf_C2H2, BTB_POZ, Znf_C2H2-like	Zbtb41
ENSMUSG00000033972	IPR001909, IPR007087, IPR015880	Krueppel-associated_box, Znf_C2H2, Znf_C2H2-like	Zfp944
ENSMUSG00000034041	IPR011598	bHLH_dom	Lyl1
ENSMUSG00000034057	IPR008967	p53-like_TF_DNA-bd	Myrfl
ENSMUSG00000034071	IPR001909, IPR007087, IPR015880	Krueppel-associated_box, Znf_C2H2, Znf_C2H2-like	Zfp551
ENSMUSG00000034075	IPR001594	Znf_DHHC_palmitoyltrfase	Zdhhc5
ENSMUSG00000034154	IPR000330	SNF2_N	Ino80
ENSMUSG00000034161	IPR011598	bHLH_dom	Scx
ENSMUSG00000034227	IPR001766	TF_fork_head	Foxj1
ENSMUSG00000034245	IPR000286	His_deacetylse	Hdac11
ENSMUSG00000034265	IPR001594	Znf_DHHC_palmitoyltrfase	Zdhhc14
ENSMUSG00000034266	IPR000837, IPR004827	AP-1, bZIP	Batf
ENSMUSG00000034269	IPR001214	SET_dom	Setd5
ENSMUSG00000034271	IPR000837, IPR004827	AP-1, bZIP	Jdp2
ENSMUSG00000034290	IPR000408	Reg_chr_condens	Nek9
ENSMUSG00000034333	IPR003656	Znf_BED	Zbed4
ENSMUSG00000034336	IPR006821	Intermed_filament_DNA-bd	Ina
ENSMUSG00000034377	IPR000007	Tubby_C	Tulp4
ENSMUSG00000034384	IPR001356, IPR009057	Homeobox_dom, Homeodomain-like	Barhl2
ENSMUSG00000034429	IPR001909, IPR007087, IPR015880	Krueppel-associated_box, Znf_C2H2, Znf_C2H2-like	Zfp707
ENSMUSG00000034430	IPR007087, IPR015880	Znf_C2H2, Znf_C2H2-like	Zxdc
ENSMUSG00000034453	IPR007120, IPR007121, IPR007641, IPR007642, IPR007644, IPR007645, IPR007646, IPR007647	DNA-dir_RNA_pol_su2_6, RNA_pol_bsu_CS, RNA_pol_Rpb2_7, RNA_pol_Rpb2_2, RNA_pol_bsu_protrusion, RNA_pol_Rpb2_3, RNA_pol_Rpb2_4, RNA_pol_Rpb2_5	Polr3b
ENSMUSG00000034460	IPR001356, IPR009057	Homeobox_dom, Homeodomain-like	Six4
ENSMUSG00000034486	IPR001356, IPR009057	Homeobox_dom, Homeodomain-like	Gbx2
ENSMUSG00000034518	IPR009071	HMG_box_dom	Hmgxb4
ENSMUSG00000034522	IPR007087	Znf_C2H2	Zfp395
ENSMUSG00000034538	IPR001909, IPR007087, IPR015880	Krueppel-associated_box, Znf_C2H2, Znf_C2H2-like	Zfp418
ENSMUSG00000034543	IPR011124	Znf_CW	Morc2a
ENSMUSG00000034551	IPR001356, IPR009057	Homeobox_dom, Homeodomain-like	Hdx
ENSMUSG00000034616	IPR014876	DEK_C	Ssh3
ENSMUSG00000034621	IPR007087	Znf_C2H2	Gpatch8
ENSMUSG00000034639	IPR001214, IPR003606, IPR003616, IPR007728	SET_dom, Pre-SET_Zn-bd_sub, Post-SET_dom, Pre-SET_dom	Setmar
ENSMUSG00000034640	IPR000571	Znf_CCCH	Tiparp
ENSMUSG00000034673	IPR001356, IPR005542, IPR009057	Homeobox_dom, PBX, Homeodomain-like	Pbx2
ENSMUSG00000034701	IPR011598, IPR016637	bHLH_dom, TF_bHLH_NeuroD	Neurod1
ENSMUSG00000034748	IPR003000	Sirtuin	Sirt6
ENSMUSG00000034762	IPR007087, IPR015880	Znf_C2H2, Znf_C2H2-like	Glis1
ENSMUSG00000034771	IPR009146	Groucho_enhance	Tle2
ENSMUSG00000034777	IPR000047, IPR001356, IPR009057	HTH_motif, Homeobox_dom, Homeodomain-like	Vax2
ENSMUSG00000034800	IPR001909, IPR007087, IPR015880	Krueppel-associated_box, Znf_C2H2, Znf_C2H2-like	Zfp661
ENSMUSG00000034832	IPR002857	Znf_CXXC	Tet3
ENSMUSG00000034910	IPR001965	Znf_PHD	Pygo1
ENSMUSG00000034949	IPR007087, IPR015880	Znf_C2H2, Znf_C2H2-like	Zfr2
ENSMUSG00000034957	IPR004827, IPR016468	bZIP, CCAAT/enhancer-binding	Cebpa
ENSMUSG00000034968	IPR000047, IPR001356, IPR009057	HTH_motif, Homeobox_dom, Homeodomain-like	Lbx2
ENSMUSG00000034998	IPR001766	TF_fork_head	Foxn2
ENSMUSG00000035011	IPR007087, IPR013069, IPR015880	Znf_C2H2, BTB_POZ, Znf_C2H2-like	Zbtb7a
ENSMUSG00000035021	IPR001965, IPR004022, IPR013136	Znf_PHD, DDT_dom, WSTF_Acf1_Cbp146	Baz1a
ENSMUSG00000035033	IPR001699, IPR008967	TF_T-box, p53-like_TF_DNA-bd	Tbr1
ENSMUSG00000035041	IPR004827	bZIP	Creb3l3
ENSMUSG00000035045	IPR000571	Znf_CCCH	Zc3h12b
ENSMUSG00000035051	IPR000571	Znf_CCCH	Dhx57
ENSMUSG00000035158	IPR011598	bHLH_dom	Mitf
ENSMUSG00000035164	IPR000571	Znf_CCCH	Zc3h12c
ENSMUSG00000035187	IPR000047, IPR001356, IPR009057	HTH_motif, Homeobox_dom, Homeodomain-like	Nkx6-1
ENSMUSG00000035277	IPR001356, IPR003654, IPR009057	Homeobox_dom, OAR_dom, Homeodomain-like	Arx
ENSMUSG00000035285	IPR000182	GNAT_dom	Nat14
ENSMUSG00000035293	IPR001965	Znf_PHD	G2e3
ENSMUSG00000035298	IPR013069	BTB_POZ	Klhl35
ENSMUSG00000035371	IPR001909, IPR003655	Krueppel-associated_box, Krueppel-associated_box-rel	Ssx9
ENSMUSG00000035397	IPR007087, IPR015880	Znf_C2H2, Znf_C2H2-like	Klf16
ENSMUSG00000035451	IPR001766, IPR013638	TF_fork_head, Fork-head_N	Foxa1
ENSMUSG00000035456	IPR001214, IPR007087, IPR015880	SET_dom, Znf_C2H2, Znf_C2H2-like	Prdm8
ENSMUSG00000035469	IPR000408, IPR013069	Reg_chr_condens, BTB_POZ	Rcbtb1
ENSMUSG00000035478	IPR001739, IPR016177	Methyl_CpG_DNA-bd, DNA-bd_dom	Mbd3
ENSMUSG00000035529	IPR001214, IPR007087, IPR015880, IPR017124	SET_dom, Znf_C2H2, Znf_C2H2-like, Znf_PRDM4	Prdm4
ENSMUSG00000035576	IPR002515, IPR004092	Znf_C2HC, Mbt	L3mbtl1
ENSMUSG00000035623	IPR001965	Znf_PHD	Rsf1
ENSMUSG00000035632	IPR007207, IPR007282, IPR012270	Not_N, NOT, CCR4-NOT_su3/5	Cnot3
ENSMUSG00000035686	IPR009786	Spot_14	Thrsp
ENSMUSG00000035726	IPR013719, IPR013953	DUF1747, FACT_Spt16p	Supt16
ENSMUSG00000035798	IPR001594	Znf_DHHC_palmitoyltrfase	Zdhhc17
ENSMUSG00000035799	IPR011598	bHLH_dom	Twist1
ENSMUSG00000035868	IPR001909, IPR007087, IPR015880	Krueppel-associated_box, Znf_C2H2, Znf_C2H2-like	3110052M02Rik
ENSMUSG00000035877	IPR001356, IPR009057, IPR015880	Homeobox_dom, Homeodomain-like, Znf_C2H2-like	Zhx3
ENSMUSG00000035923	IPR002546, IPR011598	Basic, bHLH_dom	Myf6
ENSMUSG00000035934	IPR001356, IPR008422, IPR009057	Homeobox_dom, Homeobox_KN_domain, Homeodomain-like	Pknox2
ENSMUSG00000035941	IPR000408, IPR013069	Reg_chr_condens, BTB_POZ	Ibtk
ENSMUSG00000035946	IPR001356, IPR009057	Homeobox_dom, Homeodomain-like	Gsx2
ENSMUSG00000035951	IPR011598	bHLH_dom	Ascl3
ENSMUSG00000036036	IPR001909, IPR007087, IPR015880	Krueppel-associated_box, Znf_C2H2, Znf_C2H2-like	Zfp57
ENSMUSG00000036086	IPR000330	SNF2_N	Zranb3
ENSMUSG00000036098	IPR008967	p53-like_TF_DNA-bd	Myrf
ENSMUSG00000036109	IPR000571	Znf_CCCH	Mbnl3
ENSMUSG00000036123	IPR011256	Reg_factor_effector_dom	Slc9a3
ENSMUSG00000036139	IPR001356, IPR009057, IPR017112	Homeobox_dom, Homeodomain-like, Homeobox_Hox9	Hoxc9
ENSMUSG00000036144	IPR001356, IPR009057	Homeobox_dom, Homeodomain-like	Meox2
ENSMUSG00000036192	IPR000536, IPR001628, IPR001723, IPR003079, IPR008946	Nucl_hrmn_rcpt_lig-bd_core, Znf_hrmn_rcpt, Str_hrmn_rcpt, ROR_rcpt, Nucl_hormone_rcpt_ligand-bd	Rorb
ENSMUSG00000036281	IPR001005, IPR009057	SANT/Myb, Homeodomain-like	Snapc4
ENSMUSG00000036282	IPR000182	GNAT_dom	Naa30
ENSMUSG00000036304	IPR001594	Znf_DHHC_palmitoyltrfase	Zdhhc23
ENSMUSG00000036315	IPR001222	Znf_TFIIS	Znrd1
ENSMUSG00000036442	IPR006612	Znf_C2CH	Thap11
ENSMUSG00000036461	IPR000418	Ets_dom	Elf1
ENSMUSG00000036499	IPR007087	Znf_C2H2	Eea1
ENSMUSG00000036537	IPR000571	Znf_CCCH	Rnf113a1
ENSMUSG00000036550	IPR007196	CCR4-Not_Not1_C	Cnot1
ENSMUSG00000036602	IPR001356, IPR003654, IPR009057	Homeobox_dom, OAR_dom, Homeodomain-like	Alx1
ENSMUSG00000036606	IPR002909	IPT	Plxnb2
ENSMUSG00000036721	IPR003309, IPR007087, IPR015880	Tscrpt_reg_SCAN, Znf_C2H2, Znf_C2H2-like	Zscan12
ENSMUSG00000036782	IPR013069	BTB_POZ	Klhl13
ENSMUSG00000036792	IPR001739, IPR016177	Methyl_CpG_DNA-bd, DNA-bd_dom	Mbd5
ENSMUSG00000036816	IPR011598	bHLH_dom	Atoh7
ENSMUSG00000036867	IPR001132, IPR003619, IPR008984, IPR013019	SMAD_dom_Dwarfin-type, MAD_homology1_Dwarfin-type, SMAD_FHA_domain, MAD_homology_MH1	Smad6
ENSMUSG00000036893	IPR001214, IPR003606, IPR007728	SET_dom, Pre-SET_Zn-bd_sub, Pre-SET_dom	Ehmt1
ENSMUSG00000036898	IPR001909, IPR007087, IPR015880	Krueppel-associated_box, Znf_C2H2, Znf_C2H2-like	Zfp157
ENSMUSG00000036916	IPR007087, IPR015880	Znf_C2H2, Znf_C2H2-like	Zfp280c
ENSMUSG00000036940	IPR009057, IPR017366	Homeodomain-like, Hist_Lys-spec_deMease	Kdm1a
ENSMUSG00000036972	IPR007087, IPR015880	Znf_C2H2, Znf_C2H2-like	Zic4
ENSMUSG00000036980	IPR004823	TAF_TATA-bd	Taf6
ENSMUSG00000036985	IPR001594	Znf_DHHC_palmitoyltrfase	Zdhhc9
ENSMUSG00000037001	IPR001909, IPR007087, IPR015880	Krueppel-associated_box, Znf_C2H2, Znf_C2H2-like	Zfp39
ENSMUSG00000037007	IPR001909, IPR007087, IPR015880	Krueppel-associated_box, Znf_C2H2, Znf_C2H2-like	Zfp113
ENSMUSG00000037017	IPR003309, IPR007087, IPR015880	Tscrpt_reg_SCAN, Znf_C2H2, Znf_C2H2-like	Zscan21
ENSMUSG00000037025	IPR001766, IPR013638	TF_fork_head, Fork-head_N	Foxa2
ENSMUSG00000037029	IPR007087, IPR015880	Znf_C2H2, Znf_C2H2-like	Zfp146
ENSMUSG00000037034	IPR001523, IPR009057	Paired_dom, Homeodomain-like	Pax1
ENSMUSG00000037108	IPR011124	Znf_CW	Zcwpw1
ENSMUSG00000037111	IPR001214, IPR017155	SET_dom, Hist-Lys_N-MeTrfase_SET	Setd7
ENSMUSG00000037138	IPR007797	TF_AF4/FMR2	Aff3
ENSMUSG00000037169	IPR002418, IPR011598, IPR012682	Tscrpt_reg_Myc, bHLH_dom, Tscrpt_reg_Myc_N	Mycn
ENSMUSG00000037174	IPR000418	Ets_dom	Elf2
ENSMUSG00000037188	IPR007604	CP2	Grhl3
ENSMUSG00000037214	IPR006612	Znf_C2CH	Thap1
ENSMUSG00000037235	IPR011598	bHLH_dom	Mxd4
ENSMUSG00000037243	IPR007087, IPR015880	Znf_C2H2, Znf_C2H2-like	Zfp692
ENSMUSG00000037279	IPR007087, IPR015880	Znf_C2H2, Znf_C2H2-like	Ovol2
ENSMUSG00000037307	IPR004122	BAF_prot	Banf2
ENSMUSG00000037315	IPR001965	Znf_PHD	Jade3
ENSMUSG00000037335	IPR011598	bHLH_dom	Hand1
ENSMUSG00000037395	IPR000949, IPR001005, IPR009057	ELM2_dom, SANT/Myb, Homeodomain-like	Rcor3
ENSMUSG00000037446	IPR000007	Tubby_C	Tulp1
ENSMUSG00000037447	IPR001606	ARID_dom	Arid5a
ENSMUSG00000037465	IPR007087, IPR015880	Znf_C2H2, Znf_C2H2-like	Klf10
ENSMUSG00000037477	IPR001699, IPR008967	TF_T-box, p53-like_TF_DNA-bd	Tbx10
ENSMUSG00000037492	IPR007087, IPR015880	Znf_C2H2, Znf_C2H2-like	Zmat4
ENSMUSG00000037553	IPR001594	Znf_DHHC_palmitoyltrfase	Zdhhc18
ENSMUSG00000037570	IPR008984	SMAD_FHA_domain	Mcrs1
ENSMUSG00000037572	IPR009071	HMG_box_dom	Wdhd1
ENSMUSG00000037583	IPR000536, IPR001723, IPR008946	Nucl_hrmn_rcpt_lig-bd_core, Str_hrmn_rcpt, Nucl_hormone_rcpt_ligand-bd	Nr0b2
ENSMUSG00000037621	IPR011598	bHLH_dom	Atoh8
ENSMUSG00000037638	IPR007087, IPR013069, IPR015880	Znf_C2H2, BTB_POZ, Znf_C2H2-like	Zbtb42
ENSMUSG00000037640	IPR001909, IPR007087, IPR015880	Krueppel-associated_box, Znf_C2H2, Znf_C2H2-like	Zfp60
ENSMUSG00000037674	IPR003150	DNA-bd_RFX	Rfx7
ENSMUSG00000037722	IPR000182	GNAT_dom	Gnpnat1
ENSMUSG00000037730	IPR007087, IPR013069, IPR015880	Znf_C2H2, BTB_POZ, Znf_C2H2-like	Mynn
ENSMUSG00000037784	IPR007087	Znf_C2H2	Dzip1l
ENSMUSG00000037791	IPR001965, IPR008984	Znf_PHD, SMAD_FHA_domain	Phf12
ENSMUSG00000037868	IPR007087, IPR015880	Znf_C2H2, Znf_C2H2-like	Egr2
ENSMUSG00000037896	IPR000949, IPR001005, IPR009057	ELM2_dom, SANT/Myb, Homeodomain-like	Rcor1
ENSMUSG00000037926	IPR014876	DEK_C	Ssh2
ENSMUSG00000037935	IPR009071	HMG_box_dom	Smarce1
ENSMUSG00000037965	IPR000571, IPR007087	Znf_CCCH, Znf_C2H2	Zc3h7a
ENSMUSG00000037984	IPR011598, IPR016637	bHLH_dom, TF_bHLH_NeuroD	Neurod6
ENSMUSG00000037992	IPR000536, IPR001628, IPR001723, IPR003078, IPR008946	Nucl_hrmn_rcpt_lig-bd_core, Znf_hrmn_rcpt, Str_hrmn_rcpt, Retinoic_acid_rcpt, Nucl_hormone_rcpt_ligand-bd	Rara
ENSMUSG00000038002	IPR001005	SANT/Myb	Cramp1l
ENSMUSG00000038025	IPR001965	Znf_PHD	Phf2
ENSMUSG00000038056	IPR000637, IPR001214, IPR001594, IPR001965, IPR003616, IPR003888, IPR003889, IPR009071	HMGI/Y_DNA-bd_CS, SET_dom, Znf_DHHC_palmitoyltrfase, Znf_PHD, Post-SET_dom, FYrich_N, FYrich_C, HMG_box_dom	Kmt2c
ENSMUSG00000038080	IPR009057, IPR011124	Homeodomain-like, Znf_CW	Kdm1b
ENSMUSG00000038116	IPR001965, IPR007087	Znf_PHD, Znf_C2H2	Phf20
ENSMUSG00000038151	IPR001214, IPR007087, IPR015880	SET_dom, Znf_C2H2, Znf_C2H2-like	Prdm1
ENSMUSG00000038193	IPR011598	bHLH_dom	Hand2
ENSMUSG00000038203	IPR001356, IPR009057	Homeobox_dom, Homeodomain-like	Hoxa13
ENSMUSG00000038210	IPR001356, IPR009057	Homeobox_dom, Homeodomain-like	Hoxa11
ENSMUSG00000038216	IPR000940	NNMT_TEMT_trans	Pnmt
ENSMUSG00000038227	IPR001356, IPR009057, IPR017112	Homeobox_dom, Homeodomain-like, Homeobox_Hox9	Hoxa9
ENSMUSG00000038236	IPR001356, IPR001827, IPR009057	Homeobox_dom, Homeobox_Antennapedia_CS, Homeodomain-like	Hoxa7
ENSMUSG00000038253	IPR001356, IPR001827, IPR009057	Homeobox_dom, Homeobox_Antennapedia_CS, Homeodomain-like	Hoxa5
ENSMUSG00000038255	IPR011598, IPR016637	bHLH_dom, TF_bHLH_NeuroD	Neurod2
ENSMUSG00000038331	IPR001356, IPR003350, IPR009057, IPR010982	Homeobox_dom, CUT_dom, Homeodomain-like, Lambda_DNA-bd_dom	Satb2
ENSMUSG00000038342	IPR011598	bHLH_dom	Mlxip
ENSMUSG00000038346	IPR007087, IPR015880	Znf_C2H2, Znf_C2H2-like	Zfp384
ENSMUSG00000038384	IPR001214, IPR003616	SET_dom, Post-SET_dom	Setd1b
ENSMUSG00000038402	IPR001766	TF_fork_head	Foxf2
ENSMUSG00000038415	IPR001766	TF_fork_head	Foxq1
ENSMUSG00000038418	IPR007087, IPR015880	Znf_C2H2, Znf_C2H2-like	Egr1
ENSMUSG00000038437	IPR001965	Znf_PHD	Mllt6
ENSMUSG00000038482	IPR003316, IPR014889, IPR015648	E2F_WHTH_DNA-bd_dom, Transc_factor_DP_C, Transcrpt_fac_DP	Tfdp1
ENSMUSG00000038489	IPR000268	RNAP_N/Rpb10	Polr2l
ENSMUSG00000038500	IPR000571	Znf_CCCH	Prr3
ENSMUSG00000038507	IPR000571	Znf_CCCH	Parp12
ENSMUSG00000038518	IPR001606, IPR004198	ARID_dom, Znf_C5HC2	Jarid2
ENSMUSG00000038533	IPR003894, IPR013289	TAFH_NHR1, ETO	Cbfa2t2
ENSMUSG00000038535	IPR007087, IPR015880	Znf_C2H2, Znf_C2H2-like	Zfp280d
ENSMUSG00000038539	IPR004827	bZIP	Atf5
ENSMUSG00000038560	IPR007087, IPR015880	Znf_C2H2, Znf_C2H2-like	Sp6
ENSMUSG00000038611	IPR001965	Znf_PHD	Phrf1
ENSMUSG00000038615	IPR004826, IPR004827, IPR008917	bZIP_Maf, bZIP, TF_DNA-bd	Nfe2l1
ENSMUSG00000038628	IPR001222, IPR001529	Znf_TFIIS, DNA-dir_RNA_pol_M/15kDasu	Polr3k
ENSMUSG00000038630	IPR001909, IPR003309, IPR007087, IPR015880	Krueppel-associated_box, Tscrpt_reg_SCAN, Znf_C2H2, Znf_C2H2-like	Zkscan16
ENSMUSG00000038648	IPR004827	bZIP	Creb3l2
ENSMUSG00000038664	IPR000408	Reg_chr_condens	Herc1
ENSMUSG00000038679	IPR000679, IPR007087, IPR015880	Znf_GATA, Znf_C2H2, Znf_C2H2-like	Trps1
ENSMUSG00000038692	IPR001356, IPR001827, IPR009057	Homeobox_dom, Homeobox_Antennapedia_CS, Homeodomain-like	Hoxb4
ENSMUSG00000038697	IPR007582	TFIID-su_WD40-assoc_reg	Taf5l
ENSMUSG00000038700	IPR001356, IPR001827, IPR009057	Homeobox_dom, Homeobox_Antennapedia_CS, Homeodomain-like	Hoxb5
ENSMUSG00000038705	IPR000770, IPR010919	SAND_dom, SAND_dom-like	Gmeb2
ENSMUSG00000038718	IPR001356, IPR005542, IPR009057	Homeobox_dom, PBX, Homeodomain-like	Pbx3
ENSMUSG00000038721	IPR001356, IPR001827, IPR009057	Homeobox_dom, Homeobox_Antennapedia_CS, Homeodomain-like	Hoxb7
ENSMUSG00000038725	IPR002909	IPT	Pkhd1l1
ENSMUSG00000038765	IPR001356, IPR009057	Homeobox_dom, Homeodomain-like	Lmx1b
ENSMUSG00000038784	IPR000571	Znf_CCCH	Cnot4
ENSMUSG00000038797	IPR003309, IPR007087, IPR015880	Tscrpt_reg_SCAN, Znf_C2H2, Znf_C2H2-like	Zscan2
ENSMUSG00000038805	IPR001356, IPR009057	Homeobox_dom, Homeodomain-like	Six3
ENSMUSG00000038844	IPR008984	SMAD_FHA_domain	Kif16b
ENSMUSG00000038872	IPR001356, IPR007087, IPR009057, IPR015880	Homeobox_dom, Znf_C2H2, Homeodomain-like, Znf_C2H2-like	Zfhx3
ENSMUSG00000038895	IPR007087, IPR015880	Znf_C2H2, Znf_C2H2-like	Zfp653
ENSMUSG00000038902	IPR007087, IPR009057, IPR015880	Znf_C2H2, Homeodomain-like, Znf_C2H2-like	Pogz
ENSMUSG00000038909	IPR002515	Znf_C2HC	Kat7
ENSMUSG00000038914	IPR001965	Znf_PHD	Dido1
ENSMUSG00000038930	IPR000408	Reg_chr_condens	Rccd1
ENSMUSG00000038932	IPR011598	bHLH_dom	Tcfl5
ENSMUSG00000038954	IPR003195	TFIID-18	Supt3
ENSMUSG00000039068	IPR001005, IPR009057	SANT/Myb, Homeodomain-like	Zzz3
ENSMUSG00000039081	IPR007087	Znf_C2H2	Zfp503
ENSMUSG00000039087	IPR007087, IPR015880	Znf_C2H2, Znf_C2H2-like	Rreb1
ENSMUSG00000039089	IPR004092	Mbt	L3mbtl3
ENSMUSG00000039095	IPR000747, IPR001356, IPR009057	Homeodomain_engrailed, Homeobox_dom, Homeodomain-like	En2
ENSMUSG00000039117	IPR003894, IPR007900	TAFH_NHR1, TAF4	Taf4a
ENSMUSG00000039148	IPR005011	SART_1	Sart1
ENSMUSG00000039153	IPR000040, IPR008967, IPR013524, IPR016554	AML1_Runt, p53-like_TF_DNA-bd, Runt_dom, TF_Runt-rel_RUNX	Runx2
ENSMUSG00000039191	IPR002909, IPR008967, IPR015350, IPR015351	IPT, p53-like_TF_DNA-bd, Beta-trefoil_DNA-bd_dom, LAG1_DNA-bd	Rbpj
ENSMUSG00000039199	IPR001594	Znf_DHHC_palmitoyltrfase	Zdhhc1
ENSMUSG00000039205	IPR007087, IPR015880	Znf_C2H2, Znf_C2H2-like	Ciz1
ENSMUSG00000039219	IPR001606, IPR016197	ARID_dom, Chromodomain-like	Arid4b
ENSMUSG00000039220	IPR000571	Znf_CCCH	Ppp1r10
ENSMUSG00000039231	IPR000953, IPR001214, IPR003606, IPR003616, IPR007728, IPR011381, IPR016197	Chromo/shadow_dom, SET_dom, Pre-SET_Zn-bd_sub, Post-SET_dom, Pre-SET_dom, Histone_H3-K9_MeTrfase, Chromodomain-like	Suv39h1
ENSMUSG00000039275	IPR001766, IPR008984	TF_fork_head, SMAD_FHA_domain	Foxk2
ENSMUSG00000039354	IPR000330	SNF2_N	Smarcal1
ENSMUSG00000039377	IPR000047, IPR001356, IPR009057	HTH_motif, Homeobox_dom, Homeodomain-like	Hlx
ENSMUSG00000039391	IPR010992	IHF-like_DNA-bd_dom	Ccdc81
ENSMUSG00000039396	IPR010666	Znf_GRF	Neil3
ENSMUSG00000039410	IPR001214, IPR007087, IPR015880	SET_dom, Znf_C2H2, Znf_C2H2-like	Prdm16
ENSMUSG00000039456	IPR011124	Znf_CW	Morc3
ENSMUSG00000039470	IPR001594	Znf_DHHC_palmitoyltrfase	Zdhhc2
ENSMUSG00000039476	IPR001356, IPR003654, IPR009057	Homeobox_dom, OAR_dom, Homeodomain-like	Prrx2
ENSMUSG00000039477	IPR001025	BAH_dom	Tnrc18
ENSMUSG00000039501	IPR000967	Znf_NFX1	Znfx1
ENSMUSG00000039521	IPR001766, IPR007087	TF_fork_head, Znf_C2H2	Foxp3
ENSMUSG00000039531	IPR007087, IPR015880	Znf_C2H2, Znf_C2H2-like	Zufsp
ENSMUSG00000039634	IPR001909, IPR007087, IPR015880	Krueppel-associated_box, Znf_C2H2, Znf_C2H2-like	Zfp189
ENSMUSG00000039656	IPR000003, IPR000536, IPR001628, IPR001723, IPR008946	Retinoid-X_rcpt/HNF4, Nucl_hrmn_rcpt_lig-bd_core, Znf_hrmn_rcpt, Str_hrmn_rcpt, Nucl_hormone_rcpt_ligand-bd	Rxrb
ENSMUSG00000039671	IPR001965	Znf_PHD	Zmynd8
ENSMUSG00000039699	IPR004827	bZIP	Batf2
ENSMUSG00000039738	IPR013069	BTB_POZ	Slx4
ENSMUSG00000039741	IPR001025	BAH_dom	Bahcc1
ENSMUSG00000039759	IPR006612	Znf_C2CH	Thap3
ENSMUSG00000039771	IPR008193, IPR009025	RNA_pol_Rpb11_13-16kDa_CS, RBP11-like_dimer	Polr2j
ENSMUSG00000039789	IPR001909, IPR007087, IPR015880	Krueppel-associated_box, Znf_C2H2, Znf_C2H2-like	Zfp597
ENSMUSG00000039810	IPR000571	Znf_CCCH	Zc3h10
ENSMUSG00000039830	IPR011598	bHLH_dom	Olig2
ENSMUSG00000039834	IPR007087, IPR015880	Znf_C2H2, Znf_C2H2-like	Zfp335
ENSMUSG00000039841	IPR007087, IPR015880	Znf_C2H2, Znf_C2H2-like	Zfp800
ENSMUSG00000039852	IPR000679, IPR000949, IPR001005, IPR001025, IPR009057	Znf_GATA, ELM2_dom, SANT/Myb, BAH_dom, Homeodomain-like	Rere
ENSMUSG00000039967	IPR007087, IPR015880	Znf_C2H2, Znf_C2H2-like	Zfp292
ENSMUSG00000039981	IPR000571	Znf_CCCH	Zc3h12d
ENSMUSG00000039989	IPR000953, IPR016197	Chromo/shadow_dom, Chromodomain-like	Cbx4
ENSMUSG00000040007	IPR001025	BAH_dom	Bahd1
ENSMUSG00000040033	IPR008967, IPR013801, IPR015988	p53-like_TF_DNA-bd, STAT_TF_DNA-bd, STAT_TF_coiled-coil	Stat2
ENSMUSG00000040054	IPR001739, IPR001965, IPR004022, IPR016177	Methyl_CpG_DNA-bd, Znf_PHD, DDT_dom, DNA-bd_dom	Baz2a
ENSMUSG00000040097	IPR007588	Znf_FLYWCH	Flywch1
ENSMUSG00000040123	IPR010507	Znf_MYM	Zmym5
ENSMUSG00000040148	IPR001356, IPR009057	Homeobox_dom, Homeodomain-like	Hmx3
ENSMUSG00000040167	IPR007087, IPR015880	Znf_C2H2, Znf_C2H2-like	Ikzf5
ENSMUSG00000040187	IPR001067, IPR011598	Nuc_translocat, bHLH_dom	Arntl2
ENSMUSG00000040209	IPR007087	Znf_C2H2	Zfp704
ENSMUSG00000040270	IPR004826, IPR004827, IPR008917, IPR013069	bZIP_Maf, bZIP, TF_DNA-bd, BTB_POZ	Bach2
ENSMUSG00000040289	IPR003650, IPR011598	Orange, bHLH_dom	Hey1
ENSMUSG00000040310	IPR001356, IPR003654, IPR009057	Homeobox_dom, OAR_dom, Homeodomain-like	Alx4
ENSMUSG00000040321	IPR007087, IPR015880	Znf_C2H2, Znf_C2H2-like	Zfp770
ENSMUSG00000040387	IPR013069	BTB_POZ	Klhl32
ENSMUSG00000040423	IPR000571	Znf_CCCH	Rc3h1
ENSMUSG00000040429	IPR003690	MTERF	Mterf1a
ENSMUSG00000040433	IPR007087, IPR013069, IPR015880	Znf_C2H2, BTB_POZ, Znf_C2H2-like	Zbtb38
ENSMUSG00000040478	IPR001214, IPR007087, IPR015880	SET_dom, Znf_C2H2, Znf_C2H2-like	Prdm13
ENSMUSG00000040481	IPR001965, IPR004022	Znf_PHD, DDT_dom	Bptf
ENSMUSG00000040489	IPR009071	HMG_box_dom	Sox30
ENSMUSG00000040524	IPR007087	Znf_C2H2	Zfp609
ENSMUSG00000040565	IPR000330	SNF2_N	Btaf1
ENSMUSG00000040596	IPR001909, IPR009057	Krueppel-associated_box, Homeodomain-like	Pogk
ENSMUSG00000040610	IPR001356, IPR009057	Homeobox_dom, Homeodomain-like	Tlx3
ENSMUSG00000040629	IPR009071	HMG_box_dom	Mael
ENSMUSG00000040632	IPR004826, IPR004827, IPR008917	bZIP_Maf, bZIP, TF_DNA-bd	Nrl
ENSMUSG00000040661	IPR000330	SNF2_N	Rad54l2
ENSMUSG00000040669	IPR010507	Znf_MYM	Phc1
ENSMUSG00000040681	IPR000079	HMGN_fam	Hmgn1
ENSMUSG00000040712	IPR002909, IPR005559	IPT, CG-1_dom	Camta2
ENSMUSG00000040717	IPR007087	Znf_C2H2	Il17rd
ENSMUSG00000040721	IPR001356, IPR007087, IPR009057, IPR015880	Homeobox_dom, Znf_C2H2, Homeodomain-like, Znf_C2H2-like	Zfhx2
ENSMUSG00000040726	IPR001356, IPR009057	Homeobox_dom, Homeodomain-like	Hesx1
ENSMUSG00000040732	IPR000418, IPR003118	Ets_dom, Pointed_dom	Erg
ENSMUSG00000040775	IPR007087, IPR015880	Znf_C2H2, Znf_C2H2-like	Gm9772
ENSMUSG00000040813	IPR011256	Reg_factor_effector_dom	Tex264
ENSMUSG00000040841	IPR001356, IPR009057	Homeobox_dom, Homeodomain-like	Six5
ENSMUSG00000040857	IPR000418	Ets_dom	Erf
ENSMUSG00000040891	IPR001766, IPR013638	TF_fork_head, Fork-head_N	Foxa3
ENSMUSG00000040929	IPR003150, IPR007668	DNA-bd_RFX, RFX1_trans_act	Rfx3
ENSMUSG00000040945	IPR000408	Reg_chr_condens	Rcc2
ENSMUSG00000041130	IPR007087, IPR015880	Znf_C2H2, Znf_C2H2-like	Zfp598
ENSMUSG00000041164	IPR004181	Znf_MIZ	Zmiz2
ENSMUSG00000041215	IPR005033	YEATS	Yeats2
ENSMUSG00000041229	IPR001965	Znf_PHD	Phf8
ENSMUSG00000041235	IPR000330, IPR000953, IPR016197	SNF2_N, Chromo/shadow_dom, Chromodomain-like	Chd7
ENSMUSG00000041258	IPR007087, IPR015880	Znf_C2H2, Znf_C2H2-like	Zfp236
ENSMUSG00000041272	IPR009071	HMG_box_dom	Tox
ENSMUSG00000041287	IPR009071	HMG_box_dom	Sox15
ENSMUSG00000041309	IPR000047, IPR001356, IPR009057	HTH_motif, Homeobox_dom, Homeodomain-like	Nkx6-2
ENSMUSG00000041420	IPR001356, IPR008422, IPR009057	Homeobox_dom, Homeobox_KN_domain, Homeodomain-like	Meis3
ENSMUSG00000041483	IPR007087, IPR015880	Znf_C2H2, Znf_C2H2-like	Zfp281
ENSMUSG00000041498	IPR008984	SMAD_FHA_domain	Kif14
ENSMUSG00000041515	IPR001346, IPR008984	Interferon_reg_fact_DNA-bd_dom, SMAD_FHA_domain	Irf8
ENSMUSG00000041540	IPR009071	HMG_box_dom	Sox5
ENSMUSG00000041565	IPR002515, IPR004092	Znf_C2HC, Mbt	L3mbtl4
ENSMUSG00000041578	IPR001356, IPR009057, IPR013851	Homeobox_dom, Homeodomain-like, Otx_TF_C	Crx
ENSMUSG00000041583	IPR001356, IPR009057	Homeobox_dom, Homeodomain-like	Obox6
ENSMUSG00000041649	IPR007087, IPR015880	Znf_C2H2, Znf_C2H2-like	Klf8
ENSMUSG00000041702	IPR013069	BTB_POZ	Btbd7
ENSMUSG00000041703	IPR007087, IPR015880	Znf_C2H2, Znf_C2H2-like	Zic5
ENSMUSG00000041730	IPR001356, IPR003654, IPR009057	Homeobox_dom, OAR_dom, Homeodomain-like	Prrxl1
ENSMUSG00000041773	IPR013069	BTB_POZ	Enc1
ENSMUSG00000041852	IPR001965	Znf_PHD	Tcf20
ENSMUSG00000041911	IPR000047, IPR001356, IPR009057	HTH_motif, Homeobox_dom, Homeodomain-like	Dlx1
ENSMUSG00000041995	IPR003656	Znf_BED	Zbed3
ENSMUSG00000042002	IPR001766	TF_fork_head	Foxn4
ENSMUSG00000042063	IPR001909, IPR007087, IPR015880	Krueppel-associated_box, Znf_C2H2, Znf_C2H2-like	Zfp386
ENSMUSG00000042097	IPR007087, IPR015880	Znf_C2H2, Znf_C2H2-like	Zfp239
ENSMUSG00000042109	IPR002059, IPR011129	CSP_DNA-bd, Cold_shock_prot	Csdc2
ENSMUSG00000042121	IPR014876	DEK_C	Ssh1
ENSMUSG00000042155	IPR013069	BTB_POZ	Klhl23
ENSMUSG00000042156	IPR007087, IPR015880	Znf_C2H2, Znf_C2H2-like	Dzip1
ENSMUSG00000042197	IPR007087, IPR015880	Znf_C2H2, Znf_C2H2-like	Zfp451
ENSMUSG00000042207	IPR001606, IPR001965, IPR004198, IPR013637	ARID_dom, Znf_PHD, Znf_C5HC2, Lys_sp_deMease_like_dom	Kdm5b
ENSMUSG00000042258	IPR001356, IPR009057	Homeobox_dom, Homeodomain-like	Isl1
ENSMUSG00000042292	IPR004018	RPEL_repeat	Mkl1
ENSMUSG00000042308	IPR001214, IPR003616	SET_dom, Post-SET_dom	Setd1a
ENSMUSG00000042320	IPR009057	Homeodomain-like	Prox2
ENSMUSG00000042323	IPR001025, IPR009071	BAH_dom, HMG_box_dom	Pbrm1
ENSMUSG00000042372	IPR001275, IPR005173	DM_DNA-bd, DMA	Dmrt3
ENSMUSG00000042390	IPR000679	Znf_GATA	Gatad2b
ENSMUSG00000042406	IPR004827	bZIP	Atf4
ENSMUSG00000042408	IPR010507	Znf_MYM	Zmym6
ENSMUSG00000042414	IPR001214, IPR007087, IPR015880	SET_dom, Znf_C2H2, Znf_C2H2-like	Prdm14
ENSMUSG00000042439	IPR007087, IPR015880	Znf_C2H2, Znf_C2H2-like	Zfp532
ENSMUSG00000042446	IPR010507	Znf_MYM	Zmym4
ENSMUSG00000042448	IPR001356, IPR009057	Homeobox_dom, Homeodomain-like	Hoxd1
ENSMUSG00000042472	IPR007087, IPR015880	Znf_C2H2, Znf_C2H2-like	Zfp410
ENSMUSG00000042477	IPR013854	TF_AP2_C	Tfap2e
ENSMUSG00000042496	IPR001214, IPR007087, IPR015880	SET_dom, Znf_C2H2, Znf_C2H2-like	Prdm10
ENSMUSG00000042499	IPR001356, IPR009057	Homeobox_dom, Homeodomain-like	Hoxd11
ENSMUSG00000042507	IPR000949, IPR001005, IPR007087, IPR009057	ELM2_dom, SANT/Myb, Znf_C2H2, Homeodomain-like	Elmsan1
ENSMUSG00000042508	IPR001005, IPR009057	SANT/Myb, Homeodomain-like	Dmtf1
ENSMUSG00000042514	IPR013069	BTB_POZ	Klhl14
ENSMUSG00000042557	IPR013194	HDAC_interact	Sin3a
ENSMUSG00000042570	IPR000949, IPR001005, IPR009057	ELM2_dom, SANT/Myb, Homeodomain-like	Mier2
ENSMUSG00000042589	IPR001356, IPR003350, IPR009057, IPR010982	Homeobox_dom, CUT_dom, Homeodomain-like, Lambda_DNA-bd_dom	Cux2
ENSMUSG00000042596	IPR013854	TF_AP2_C	Tfap2d
ENSMUSG00000042599	IPR001965	Znf_PHD	Kdm7a
ENSMUSG00000042622	IPR004826, IPR004827, IPR008917	bZIP_Maf, bZIP, TF_DNA-bd	Maff
ENSMUSG00000042745	IPR011598	bHLH_dom	Id1
ENSMUSG00000042770	IPR011256	Reg_factor_effector_dom	Hebp1
ENSMUSG00000042812	IPR001766	TF_fork_head	Foxf1
ENSMUSG00000042821	IPR007087, IPR015880	Znf_C2H2, Znf_C2H2-like	Snai1
ENSMUSG00000042851	IPR000571	Znf_CCCH	Zc3h6
ENSMUSG00000042903	IPR001766	TF_fork_head	Foxo4
ENSMUSG00000043008	IPR013069	BTB_POZ	Klhl6
ENSMUSG00000043013	IPR001356, IPR003350, IPR009057, IPR010982	Homeobox_dom, CUT_dom, Homeodomain-like, Lambda_DNA-bd_dom	Onecut1
ENSMUSG00000043059	IPR007087, IPR015880	Znf_C2H2, Znf_C2H2-like	Zfp513
ENSMUSG00000043090	IPR001909, IPR007087, IPR015880	Krueppel-associated_box, Znf_C2H2, Znf_C2H2-like	Zfp866
ENSMUSG00000043099	IPR007087, IPR013069, IPR015880	Znf_C2H2, BTB_POZ, Znf_C2H2-like	Hic1
ENSMUSG00000043219	IPR001356, IPR001827, IPR009057	Homeobox_dom, Homeobox_Antennapedia_CS, Homeodomain-like	Hoxa6
ENSMUSG00000043290	IPR007087, IPR015880	Znf_C2H2, Znf_C2H2-like	Zfp784
ENSMUSG00000043342	IPR001356, IPR009057, IPR017112	Homeobox_dom, Homeodomain-like, Homeobox_Hox9	Hoxd9
ENSMUSG00000043432	IPR000571	Znf_CCCH	Leng9
ENSMUSG00000043456	IPR007087, IPR015880	Znf_C2H2, Znf_C2H2-like	Zfp536
ENSMUSG00000043467	IPR007087, IPR013069, IPR015880	Znf_C2H2, BTB_POZ, Znf_C2H2-like	Zbtb37
ENSMUSG00000043602	IPR007087, IPR015880	Znf_C2H2, Znf_C2H2-like	Zfp3
ENSMUSG00000043668	IPR009071	HMG_box_dom	Tox3
ENSMUSG00000043753	IPR001275, IPR005173	DM_DNA-bd, DMA	Dmrta1
ENSMUSG00000043760	IPR002909	IPT	Pkhd1
ENSMUSG00000043773	IPR001909	Krueppel-associated_box	1700048O20Rik
ENSMUSG00000043872	IPR010507	Znf_MYM	Zmym1
ENSMUSG00000043881	IPR013069	BTB_POZ	Kbtbd7
ENSMUSG00000043929	IPR013069	BTB_POZ	Klhl15
ENSMUSG00000043969	IPR000047, IPR001356, IPR009057	HTH_motif, Homeobox_dom, Homeodomain-like	Emx2
ENSMUSG00000044068	IPR000571	Znf_CCCH	Zrsr1
ENSMUSG00000044167	IPR001766	TF_fork_head	Foxo1
ENSMUSG00000044186	IPR001356, IPR009057	Homeobox_dom, Homeodomain-like	Nkx2-6
ENSMUSG00000044220	IPR001356, IPR009057	Homeobox_dom, Homeodomain-like	Nkx2-3
ENSMUSG00000044224	IPR007087, IPR015880	Znf_C2H2, Znf_C2H2-like	Dnajc21
ENSMUSG00000044243	IPR011598	bHLH_dom	Bhlha9
ENSMUSG00000044296	IPR001909, IPR007087, IPR015880	Krueppel-associated_box, Znf_C2H2, Znf_C2H2-like	Zfp879
ENSMUSG00000044312	IPR011598	bHLH_dom	Neurog3
ENSMUSG00000044365	IPR002857	Znf_CXXC	Cxxc4
ENSMUSG00000044390	IPR007889, IPR009057	HTH_Psq, Homeodomain-like	Tigd3
ENSMUSG00000044442	IPR002052	DNA_methylase_N6_adenine_CS	N6amt1
ENSMUSG00000044452	IPR007087, IPR015880	Znf_C2H2, Znf_C2H2-like	Zfp507
ENSMUSG00000044501	IPR001909, IPR007087, IPR015880	Krueppel-associated_box, Znf_C2H2, Znf_C2H2-like	Zfp758
ENSMUSG00000044518	IPR001766	TF_fork_head	Foxe3
ENSMUSG00000044519	IPR007087, IPR015880	Znf_C2H2, Znf_C2H2-like	Zfp488
ENSMUSG00000044542	IPR001356, IPR009057	Homeobox_dom, Homeodomain-like	Prop1
ENSMUSG00000044562	IPR008984	SMAD_FHA_domain	Rasip1
ENSMUSG00000044597	IPR002418, IPR011598, IPR012682	Tscrpt_reg_Myc, bHLH_dom, Tscrpt_reg_Myc_N	Mycs
ENSMUSG00000044617	IPR007087, IPR013069, IPR015880	Znf_C2H2, BTB_POZ, Znf_C2H2-like	Zbtb39
ENSMUSG00000044646	IPR007087, IPR013069, IPR015880	Znf_C2H2, BTB_POZ, Znf_C2H2-like	Zbtb7c
ENSMUSG00000044676	IPR001909, IPR007087, IPR015880	Krueppel-associated_box, Znf_C2H2, Znf_C2H2-like	Zfp612
ENSMUSG00000044786	IPR000571	Znf_CCCH	Zfp36
ENSMUSG00000044791	IPR001214, IPR003616, IPR006560	SET_dom, Post-SET_dom, AWS_dom	Setd2
ENSMUSG00000044807	IPR001909, IPR007087, IPR015880	Krueppel-associated_box, Znf_C2H2, Znf_C2H2-like	Zfp354c
ENSMUSG00000044876	IPR003309, IPR007087, IPR015880	Tscrpt_reg_SCAN, Znf_C2H2, Znf_C2H2-like	Zfp444
ENSMUSG00000044934	IPR007087, IPR015880	Znf_C2H2, Znf_C2H2-like	Zfp367
ENSMUSG00000044938	IPR013069	BTB_POZ	Klhl31
ENSMUSG00000045098	IPR001214	SET_dom	Suv420h1
ENSMUSG00000045160	IPR002634	BolA	Bola3
ENSMUSG00000045179	IPR009071	HMG_box_dom	Sox3
ENSMUSG00000045251	IPR001909, IPR007087, IPR015880	Krueppel-associated_box, Znf_C2H2, Znf_C2H2-like	Zfp688
ENSMUSG00000045252	IPR007087, IPR015880	Znf_C2H2, Znf_C2H2-like	Zfp574
ENSMUSG00000045268	IPR007087, IPR015880	Znf_C2H2, Znf_C2H2-like	Zfp691
ENSMUSG00000045333	IPR007087, IPR015880	Znf_C2H2, Znf_C2H2-like	Zfp423
ENSMUSG00000045336	IPR000232	HSF_DNA-bd	Hsfy2
ENSMUSG00000045440	IPR007087, IPR015880	Znf_C2H2, Znf_C2H2-like	Insm2
ENSMUSG00000045466	IPR007087, IPR015880	Znf_C2H2, Znf_C2H2-like	Zfp956
ENSMUSG00000045493	IPR011598	bHLH_dom	Bhlhe23
ENSMUSG00000045515	IPR000327, IPR001356, IPR009057, IPR010982, IPR013847, IPR016362	POU_specific, Homeobox_dom, Homeodomain-like, Lambda_DNA-bd_dom, POU, TF_POU_3	Pou3f3
ENSMUSG00000045518	IPR001356, IPR003350, IPR009057, IPR010982	Homeobox_dom, CUT_dom, Homeodomain-like, Lambda_DNA-bd_dom	Onecut3
ENSMUSG00000045519	IPR001909, IPR003656, IPR007087, IPR015880	Krueppel-associated_box, Znf_BED, Znf_C2H2, Znf_C2H2-like	Zfp560
ENSMUSG00000045591	IPR011598	bHLH_dom	Olig3
ENSMUSG00000045598	IPR007087, IPR015880	Znf_C2H2, Znf_C2H2-like	Zfp553
ENSMUSG00000045608	IPR000047, IPR001356, IPR009057	HTH_motif, Homeobox_dom, Homeodomain-like	Dbx2
ENSMUSG00000045639	IPR007087, IPR015880	Znf_C2H2, Znf_C2H2-like	Zfp629
ENSMUSG00000045680	IPR011598	bHLH_dom	Tcf21
ENSMUSG00000045699	IPR001909	Krueppel-associated_box	Gm21411
ENSMUSG00000045757	IPR001909, IPR007087, IPR015880	Krueppel-associated_box, Znf_C2H2, Znf_C2H2-like	Zfp764
ENSMUSG00000045802	IPR000232	HSF_DNA-bd	Hsf3
ENSMUSG00000045817	IPR000571	Znf_CCCH	Zfp36l2
ENSMUSG00000045903	IPR011598	bHLH_dom	Npas4
ENSMUSG00000045969	IPR001965	Znf_PHD	Ing1
ENSMUSG00000045991	IPR001356, IPR003350, IPR009057, IPR010982	Homeobox_dom, CUT_dom, Homeodomain-like, Lambda_DNA-bd_dom	Onecut2
ENSMUSG00000045996	IPR006591	RNAP_P/RPABC4	Polr2k
ENSMUSG00000046000	IPR000182	GNAT_dom	Naa11
ENSMUSG00000046088	IPR007087, IPR015880	Znf_C2H2, Znf_C2H2-like	Gm9805
ENSMUSG00000046160	IPR011598	bHLH_dom	Olig1
ENSMUSG00000046179	IPR003316	E2F_WHTH_DNA-bd_dom	E2f8
ENSMUSG00000046185	IPR001909, IPR007087, IPR015880	Krueppel-associated_box, Znf_C2H2, Znf_C2H2-like	Zfp84
ENSMUSG00000046229	IPR003309	Tscrpt_reg_SCAN	Scand1
ENSMUSG00000046311	IPR007087, IPR015880	Znf_C2H2, Znf_C2H2-like	Zfp62
ENSMUSG00000046351	IPR007087, IPR015880	Znf_C2H2, Znf_C2H2-like	Zfp322a
ENSMUSG00000046380	IPR007889, IPR009057	HTH_Psq, Homeodomain-like	Jrk
ENSMUSG00000046404	IPR007087	Znf_C2H2	Yod1
ENSMUSG00000046470	IPR009071	HMG_box_dom	Sox18
ENSMUSG00000046518	IPR011598	bHLH_dom	Ferd3l
ENSMUSG00000046532	IPR000536, IPR001103, IPR001628, IPR008946	Nucl_hrmn_rcpt_lig-bd_core, Andrgn_rcpt, Znf_hrmn_rcpt, Nucl_hormone_rcpt_ligand-bd	Ar
ENSMUSG00000046541	IPR007087, IPR015880	Znf_C2H2, Znf_C2H2-like	Zfp526
ENSMUSG00000046556	IPR007087, IPR015880	Znf_C2H2, Znf_C2H2-like	Zfp319
ENSMUSG00000046572	IPR007087, IPR015880	Znf_C2H2, Znf_C2H2-like	Zfp518b
ENSMUSG00000046658	IPR001909, IPR007087, IPR015880	Krueppel-associated_box, Znf_C2H2, Znf_C2H2-like	Zfp316
ENSMUSG00000046668	IPR002857	Znf_CXXC	Cxxc5
ENSMUSG00000046688	IPR008984	SMAD_FHA_domain	Tifa
ENSMUSG00000046711	IPR000116, IPR000637	HMGI/HMGY, HMGI/Y_DNA-bd_CS	Hmga1
ENSMUSG00000046714	IPR001766	TF_fork_head	Foxc2
ENSMUSG00000046792	IPR007087, IPR015880	Znf_C2H2, Znf_C2H2-like	Zfp787
ENSMUSG00000046873	IPR007087, IPR015880	Znf_C2H2, Znf_C2H2-like	Mbtps2
ENSMUSG00000046876	IPR013723	Ataxin-1_HBP1	Atxn1
ENSMUSG00000046897	IPR007087, IPR015880	Znf_C2H2, Znf_C2H2-like	Zfp740
ENSMUSG00000046962	IPR007087, IPR013069, IPR015880	Znf_C2H2, BTB_POZ, Znf_C2H2-like	Zbtb21
ENSMUSG00000046982	IPR001356, IPR007087, IPR015880	Homeobox_dom, Znf_C2H2, Znf_C2H2-like	Tshz1
ENSMUSG00000047002	IPR011598	bHLH_dom	Msgn1
ENSMUSG00000047003	IPR007087, IPR015880	Znf_C2H2, Znf_C2H2-like	Zfp41
ENSMUSG00000047036	IPR001909, IPR003309, IPR007087, IPR015880	Krueppel-associated_box, Tscrpt_reg_SCAN, Znf_C2H2, Znf_C2H2-like	Zfp445
ENSMUSG00000047141	IPR007087, IPR015880	Znf_C2H2, Znf_C2H2-like	Zfp654
ENSMUSG00000047143	IPR001275, IPR005173	DM_DNA-bd, DMA	Dmrta2
ENSMUSG00000047146	IPR002857	Znf_CXXC	Tet1
ENSMUSG00000047171	IPR003650, IPR011598	Orange, bHLH_dom	Helt
ENSMUSG00000047264	IPR007087, IPR015880	Znf_C2H2, Znf_C2H2-like	Zfp358
ENSMUSG00000047342	IPR001909, IPR007087, IPR015880	Krueppel-associated_box, Znf_C2H2, Znf_C2H2-like	Zfp286
ENSMUSG00000047371	IPR007087, IPR015880	Znf_C2H2, Znf_C2H2-like	Zfp768
ENSMUSG00000047388	IPR007087, IPR015880	Znf_C2H2, Znf_C2H2-like	Atmin
ENSMUSG00000047407	IPR001356, IPR008422, IPR009057	Homeobox_dom, Homeobox_KN_domain, Homeodomain-like	Tgif1
ENSMUSG00000047412	IPR007087, IPR013069, IPR015880	Znf_C2H2, BTB_POZ, Znf_C2H2-like	Zbtb44
ENSMUSG00000047473	IPR001909, IPR007087, IPR015880	Krueppel-associated_box, Znf_C2H2, Znf_C2H2-like	Zfp30
ENSMUSG00000047485	IPR013069	BTB_POZ	Klhl34
ENSMUSG00000047534	IPR001005, IPR009057, IPR015216	SANT/Myb, Homeodomain-like, SANTA	Mis18bp1
ENSMUSG00000047591	IPR004826, IPR004827, IPR008917	bZIP_Maf, bZIP, TF_DNA-bd	Mafa
ENSMUSG00000047603	IPR001909, IPR007087, IPR015880	Krueppel-associated_box, Znf_C2H2, Znf_C2H2-like	Zfp235
ENSMUSG00000047638	IPR000536, IPR001628, IPR001723, IPR001728, IPR008946	Nucl_hrmn_rcpt_lig-bd_core, Znf_hrmn_rcpt, Str_hrmn_rcpt, ThyrH_rcpt, Nucl_hormone_rcpt_ligand-bd	Nr1h4
ENSMUSG00000047710	IPR007087, IPR015880	Znf_C2H2, Znf_C2H2-like	Champ1
ENSMUSG00000047721	IPR002634	BolA	Bola2
ENSMUSG00000047749	IPR000571	Znf_CCCH	Zc3hav1l
ENSMUSG00000047777	IPR001965	Znf_PHD	Phf13
ENSMUSG00000047819	IPR007889, IPR009057	HTH_Psq, Homeodomain-like	Tigd4
ENSMUSG00000047824	IPR001965	Znf_PHD	Pygo2
ENSMUSG00000047861	IPR001766	TF_fork_head	Foxi1
ENSMUSG00000047907	IPR001356, IPR007087, IPR009057, IPR015880	Homeobox_dom, Znf_C2H2, Homeodomain-like, Znf_C2H2-like	Tshz2
ENSMUSG00000048001	IPR003650, IPR011598	Orange, bHLH_dom	Hes5
ENSMUSG00000048012	IPR001909, IPR007087, IPR015880	Krueppel-associated_box, Znf_C2H2, Znf_C2H2-like	Zfp473
ENSMUSG00000048015	IPR011598, IPR016637	bHLH_dom, TF_bHLH_NeuroD	Neurod4
ENSMUSG00000048047	IPR007087, IPR013069, IPR015880	Znf_C2H2, BTB_POZ, Znf_C2H2-like	Zbtb33
ENSMUSG00000048100	IPR003195	TFIID-18	Taf13
ENSMUSG00000048118	IPR000953, IPR001606, IPR016197	Chromo/shadow_dom, ARID_dom, Chromodomain-like	Arid4a
ENSMUSG00000048138	IPR001275	DM_DNA-bd	Dmrt2
ENSMUSG00000048142	IPR000182	GNAT_dom	Nat8l
ENSMUSG00000048154	IPR001214, IPR001965, IPR003616, IPR003888, IPR003889, IPR009071	SET_dom, Znf_PHD, Post-SET_dom, FYrich_N, FYrich_C, HMG_box_dom	Kmt2d
ENSMUSG00000048217	IPR000182	GNAT_dom	Nags
ENSMUSG00000048249	IPR004827	bZIP	Crebrf
ENSMUSG00000048251	IPR007087, IPR015880	Znf_C2H2, Znf_C2H2-like	Bcl11b
ENSMUSG00000048280	IPR001909, IPR007087, IPR015880	Krueppel-associated_box, Znf_C2H2, Znf_C2H2-like	Zfp738
ENSMUSG00000048349	IPR000327, IPR001356, IPR009057, IPR010982, IPR013847	POU_specific, Homeobox_dom, Homeodomain-like, Lambda_DNA-bd_dom, POU	Pou4f1
ENSMUSG00000048377	IPR001766	TF_fork_head	Foxi2
ENSMUSG00000048385	IPR007087, IPR015880	Znf_C2H2, Znf_C2H2-like	Scrt1
ENSMUSG00000048387	IPR007087, IPR015880	Znf_C2H2, Znf_C2H2-like	Osr1
ENSMUSG00000048402	IPR007087, IPR015880	Znf_C2H2, Znf_C2H2-like	Gli2
ENSMUSG00000048410	IPR007087, IPR015880	Znf_C2H2, Znf_C2H2-like	Zfp407
ENSMUSG00000048439	IPR000571	Znf_CCCH	Nupl2
ENSMUSG00000048450	IPR001356, IPR009057	Homeobox_dom, Homeodomain-like	Msx1
ENSMUSG00000048481	IPR001005	SANT/Myb	Mypop
ENSMUSG00000048483	IPR001594	Znf_DHHC_palmitoyltrfase	Zdhhc22
ENSMUSG00000048485	IPR007087, IPR013069, IPR015880	Znf_C2H2, BTB_POZ, Znf_C2H2-like	Zbtb8b
ENSMUSG00000048502	IPR000047, IPR001356, IPR009057	HTH_motif, Homeobox_dom, Homeodomain-like	Duxbl1
ENSMUSG00000048528	IPR001356, IPR009057	Homeobox_dom, Homeodomain-like	Nkx1-2
ENSMUSG00000048537	IPR008984	SMAD_FHA_domain	Phldb1
ENSMUSG00000048540	IPR011598	bHLH_dom	Nhlh2
ENSMUSG00000048562	IPR007087, IPR015880	Znf_C2H2, Znf_C2H2-like	Sp8
ENSMUSG00000048602	IPR011124	Znf_CW	Morc2b
ENSMUSG00000048626	IPR007087, IPR015880	Znf_C2H2, Znf_C2H2-like	Klf17
ENSMUSG00000048686	IPR009071	HMG_box_dom	Hmgb4
ENSMUSG00000048728	IPR001909, IPR007087, IPR015880	Krueppel-associated_box, Znf_C2H2, Znf_C2H2-like	Zfp454
ENSMUSG00000048732	IPR013069	BTB_POZ	Klhl11
ENSMUSG00000048756	IPR001766	TF_fork_head	Foxo3
ENSMUSG00000048763	IPR001356, IPR001827, IPR009057	Homeobox_dom, Homeobox_Antennapedia_CS, Homeodomain-like	Hoxb3
ENSMUSG00000048874	IPR001965	Znf_PHD	Phf3
ENSMUSG00000048897	IPR007087, IPR015880	Znf_C2H2, Znf_C2H2-like	Zfp710
ENSMUSG00000048904	IPR011598	bHLH_dom	Neurog1
ENSMUSG00000048921	IPR001909, IPR007087, IPR015880	Krueppel-associated_box, Znf_C2H2, Znf_C2H2-like	Zfp689
ENSMUSG00000048938	IPR000536, IPR001628, IPR001723, IPR008946	Nucl_hrmn_rcpt_lig-bd_core, Znf_hrmn_rcpt, Str_hrmn_rcpt, Nucl_hormone_rcpt_ligand-bd	Nr1h5
ENSMUSG00000048997	IPR013243	SCA7_dom	Atxn7l2
ENSMUSG00000049038	IPR003690	MTERF	Mterf2
ENSMUSG00000049086	IPR002418, IPR012682	Tscrpt_reg_Myc, Tscrpt_reg_Myc_N	Bmyc
ENSMUSG00000049164	IPR007087, IPR015880	Znf_C2H2, Znf_C2H2-like	Zfp518a
ENSMUSG00000049232	IPR007889, IPR009057	HTH_Psq, Homeodomain-like	Tigd2
ENSMUSG00000049295	IPR007087, IPR015880	Znf_C2H2, Znf_C2H2-like	Zfp219
ENSMUSG00000049321	IPR007087, IPR015880	Znf_C2H2, Znf_C2H2-like	Zfp2
ENSMUSG00000049327	IPR001214, IPR016858	SET_dom, Hist_H4-K20_MeTrfase	Setd8
ENSMUSG00000049410	IPR007087, IPR015880	Znf_C2H2, Znf_C2H2-like	Zfp683
ENSMUSG00000049421	IPR007087, IPR015880	Znf_C2H2, Znf_C2H2-like	Zfp260
ENSMUSG00000049470	IPR007797	TF_AF4/FMR2	Aff4
ENSMUSG00000049516	IPR013256	Chromatin_SPT2	Spty2d1
ENSMUSG00000049532	IPR007087, IPR015880	Znf_C2H2, Znf_C2H2-like	Sall2
ENSMUSG00000049553	IPR000722, IPR006592, IPR007066, IPR007080, IPR007081, IPR007083	RNA_pol_asu, RNA_pol_N, RNA_pol_Rpb1_3, RNA_pol_Rpb1_1, RNA_pol_Rpb1_5, RNA_pol_Rpb1_4	Polr1a
ENSMUSG00000049577	IPR007087, IPR015880	Znf_C2H2, Znf_C2H2-like	Zfpm1
ENSMUSG00000049600	IPR007087, IPR013069, IPR015880	Znf_C2H2, BTB_POZ, Znf_C2H2-like	Zbtb45
ENSMUSG00000049604	IPR001356, IPR009057	Homeobox_dom, Homeodomain-like	Hoxb13
ENSMUSG00000049606	IPR007087, IPR015880	Znf_C2H2, Znf_C2H2-like	Zfp644
ENSMUSG00000049625	IPR008984	SMAD_FHA_domain	Tifab
ENSMUSG00000049641	IPR011520	Vg_Tdu	Vgll2
ENSMUSG00000049657	IPR007087, IPR013069, IPR015880	Znf_C2H2, BTB_POZ, Znf_C2H2-like	Zbtb5
ENSMUSG00000049658	IPR001005, IPR009057	SANT/Myb, Homeodomain-like	Bdp1
ENSMUSG00000049672	IPR007087, IPR013069, IPR015880	Znf_C2H2, BTB_POZ, Znf_C2H2-like	Zbtb14
ENSMUSG00000049691	IPR001356, IPR009057	Homeobox_dom, Homeodomain-like	Nkx3-2
ENSMUSG00000049728	IPR007087, IPR015880	Znf_C2H2, Znf_C2H2-like	Zfp668
ENSMUSG00000049739	IPR007087, IPR015880	Znf_C2H2, Znf_C2H2-like	Zfp646
ENSMUSG00000049755	IPR007087, IPR015880	Znf_C2H2, Znf_C2H2-like	Zfp672
ENSMUSG00000049764	IPR007087, IPR015880	Znf_C2H2, Znf_C2H2-like	Zfp280b
ENSMUSG00000049823	IPR007087, IPR013069, IPR015880	Znf_C2H2, BTB_POZ, Znf_C2H2-like	Zbtb12
ENSMUSG00000049878	IPR007087, IPR015880	Znf_C2H2, Znf_C2H2-like	Rlf
ENSMUSG00000050064	IPR007087, IPR015880	Znf_C2H2, Znf_C2H2-like	Zfp697
ENSMUSG00000050100	IPR001356, IPR009057	Homeobox_dom, Homeodomain-like	Hmx2
ENSMUSG00000050197	IPR001356, IPR009057	Homeobox_dom, Homeodomain-like	Rhox13
ENSMUSG00000050213	IPR008984	SMAD_FHA_domain	Snip1
ENSMUSG00000050240	IPR007087, IPR013069, IPR015880	Znf_C2H2, BTB_POZ, Znf_C2H2-like	Hic2
ENSMUSG00000050295	IPR001766	TF_fork_head	Foxc1
ENSMUSG00000050328	IPR001356, IPR009057	Homeobox_dom, Homeodomain-like	Hoxc12
ENSMUSG00000050368	IPR001356, IPR009057	Homeobox_dom, Homeodomain-like	Hoxd10
ENSMUSG00000050397	IPR001766	TF_fork_head	Foxl2
ENSMUSG00000050410	IPR008984	SMAD_FHA_domain	Tcf19
ENSMUSG00000050600	IPR007087, IPR015880	Znf_C2H2, Znf_C2H2-like	Zfp831
ENSMUSG00000050605	IPR001909, IPR007087, IPR015880	Krueppel-associated_box, Znf_C2H2, Znf_C2H2-like	Zfp61
ENSMUSG00000050619	IPR003309, IPR007087, IPR015880	Tscrpt_reg_SCAN, Znf_C2H2, Znf_C2H2-like	Zscan29
ENSMUSG00000050714	IPR007087, IPR013069, IPR015880	Znf_C2H2, BTB_POZ, Znf_C2H2-like	Zbtb26
ENSMUSG00000050844	IPR001909	Krueppel-associated_box	1700020N01Rik
ENSMUSG00000050846	IPR007087, IPR015880	Znf_C2H2, Znf_C2H2-like	Zfp623
ENSMUSG00000050855	IPR001909, IPR007087, IPR015880	Krueppel-associated_box, Znf_C2H2, Znf_C2H2-like	Zfp940
ENSMUSG00000050919	IPR007087, IPR015880	Znf_C2H2, Znf_C2H2-like	Zfp366
ENSMUSG00000050945	IPR007087, IPR015880	Znf_C2H2, Znf_C2H2-like	Zfp438
ENSMUSG00000050954	IPR001909, IPR007087, IPR015880	Krueppel-associated_box, Znf_C2H2, Znf_C2H2-like	Zfp169
ENSMUSG00000050966	IPR002059, IPR011129	CSP_DNA-bd, Cold_shock_prot	Lin28a
ENSMUSG00000051034	IPR007087, IPR015880	Znf_C2H2, Znf_C2H2-like	Zfp11
ENSMUSG00000051037	IPR001909, IPR007087, IPR015880	Krueppel-associated_box, Znf_C2H2, Znf_C2H2-like	Zfp455
ENSMUSG00000051038	IPR001356, IPR009057	Homeobox_dom, Homeodomain-like	Rhox11
ENSMUSG00000051149	IPR001356, IPR007087, IPR009057, IPR015880	Homeobox_dom, Znf_C2H2, Homeodomain-like, Znf_C2H2-like	Adnp
ENSMUSG00000051176	IPR007087, IPR015880	Znf_C2H2, Znf_C2H2-like	Zfp42
ENSMUSG00000051184	IPR007087, IPR015880	Znf_C2H2, Znf_C2H2-like	Zfp524
ENSMUSG00000051220	IPR000330	SNF2_N	Ercc6l
ENSMUSG00000051224	IPR016492	TF_IIS-rel	Tceanc
ENSMUSG00000051251	IPR011598	bHLH_dom	Nhlh1
ENSMUSG00000051262	IPR000182	GNAT_dom	Cml3
ENSMUSG00000051278	IPR010666	Znf_GRF	Zgrf1
ENSMUSG00000051316	IPR006751	TAFII55_prot_cons_reg	Taf7
ENSMUSG00000051341	IPR001909, IPR007087, IPR015880	Krueppel-associated_box, Znf_C2H2, Znf_C2H2-like	Zfp52
ENSMUSG00000051351	IPR001909, IPR007087, IPR015880	Krueppel-associated_box, Znf_C2H2, Znf_C2H2-like	Zfp46
ENSMUSG00000051367	IPR001356, IPR009057	Homeobox_dom, Homeodomain-like	Six1
ENSMUSG00000051390	IPR007087, IPR013069, IPR015880	Znf_C2H2, BTB_POZ, Znf_C2H2-like	Zbtb22
ENSMUSG00000051413	IPR007087, IPR015880	Znf_C2H2, Znf_C2H2-like	Plagl2
ENSMUSG00000051435	IPR008984	SMAD_FHA_domain	Fhad1
ENSMUSG00000051451	IPR004827	bZIP	Crebzf
ENSMUSG00000051469	IPR003309, IPR007087, IPR015880	Tscrpt_reg_SCAN, Znf_C2H2, Znf_C2H2-like	Zfp191
ENSMUSG00000051490	IPR001766	TF_fork_head	Foxd4
ENSMUSG00000051499	IPR001909, IPR007087, IPR015880	Krueppel-associated_box, Znf_C2H2, Znf_C2H2-like	Zfp786
ENSMUSG00000051510	IPR004826, IPR004827, IPR008917	bZIP_Maf, bZIP, TF_DNA-bd	Mafg
ENSMUSG00000051550	IPR007087, IPR015880	Znf_C2H2, Znf_C2H2-like	Zfp579
ENSMUSG00000051730	IPR002052	DNA_methylase_N6_adenine_CS	Mettl5
ENSMUSG00000051817	IPR009071	HMG_box_dom	Sox12
ENSMUSG00000051827	IPR001356, IPR009057	Homeobox_dom, Homeodomain-like	Rhox2a
ENSMUSG00000051910	IPR009071	HMG_box_dom	Sox6
ENSMUSG00000051977	IPR001214, IPR001909, IPR003655, IPR007087, IPR015880	SET_dom, Krueppel-associated_box, Krueppel-associated_box-rel, Znf_C2H2, Znf_C2H2-like	Prdm9
ENSMUSG00000052040	IPR007087, IPR015880	Znf_C2H2, Znf_C2H2-like	Klf13
ENSMUSG00000052056	IPR007087, IPR015880	Znf_C2H2, Znf_C2H2-like	Zfp217
ENSMUSG00000052135	IPR001766	TF_fork_head	Foxo6
ENSMUSG00000052253	IPR007087, IPR015880	Znf_C2H2, Znf_C2H2-like	Zfp622
ENSMUSG00000052271	IPR011598	bHLH_dom	Bhlha15
ENSMUSG00000052363	IPR001594	Znf_DHHC_palmitoyltrfase	Zdhhc19
ENSMUSG00000052414	IPR004827, IPR007087, IPR015880, IPR016378	bZIP, Znf_C2H2, Znf_C2H2-like, TF_CRE-BP1-typ	Gm28047
ENSMUSG00000052435	IPR004827, IPR016468	bZIP, CCAAT/enhancer-binding	Cebpe
ENSMUSG00000052446	IPR001909, IPR007087, IPR015880	Krueppel-associated_box, Znf_C2H2, Znf_C2H2-like	Zfp961
ENSMUSG00000052534	IPR001356, IPR005542, IPR009057	Homeobox_dom, PBX, Homeodomain-like	Pbx1
ENSMUSG00000052557	IPR013069	BTB_POZ	Gan
ENSMUSG00000052616	IPR001005, IPR009057	SANT/Myb, Homeodomain-like	Ccdc79
ENSMUSG00000052675	IPR001909, IPR007087, IPR015880	Krueppel-associated_box, Znf_C2H2, Znf_C2H2-like	Zfp112
ENSMUSG00000052676	IPR007087, IPR015880	Znf_C2H2, Znf_C2H2-like	Zmat1
ENSMUSG00000052684	IPR002112, IPR004827, IPR008917	Leuzip_Jun, bZIP, TF_DNA-bd	Jun
ENSMUSG00000052713	IPR007087	Znf_C2H2	Zfp608
ENSMUSG00000052751	IPR007087, IPR015880	Znf_C2H2, Znf_C2H2-like	Repin1
ENSMUSG00000052763	IPR001909, IPR007087, IPR015880	Krueppel-associated_box, Znf_C2H2, Znf_C2H2-like	Zfp212
ENSMUSG00000052837	IPR002112, IPR004827, IPR008917	Leuzip_Jun, bZIP, TF_DNA-bd	Junb
ENSMUSG00000052909	IPR001909, IPR007087, IPR015880	Krueppel-associated_box, Znf_C2H2, Znf_C2H2-like	Gm9894
ENSMUSG00000052942	IPR007087, IPR015880	Znf_C2H2, Znf_C2H2-like	Glis3
ENSMUSG00000053007	IPR004827	bZIP	Creb5
ENSMUSG00000053080	IPR015880	Znf_C2H2-like	2700081O15Rik
ENSMUSG00000053129	IPR001356, IPR009057	Homeobox_dom, Homeodomain-like	Gsx1
ENSMUSG00000053178	IPR003690	MTERF	Mterf1b
ENSMUSG00000053211	IPR006794, IPR007087, IPR015880	Transcrp_activ_Zfx/Zfy-dom, Znf_C2H2, Znf_C2H2-like	Zfy1
ENSMUSG00000053286	IPR007087, IPR015880	Znf_C2H2, Znf_C2H2-like	Trmt1l
ENSMUSG00000053347	IPR001909, IPR007087, IPR015880	Krueppel-associated_box, Znf_C2H2, Znf_C2H2-like	Zfp943
ENSMUSG00000053390	IPR001909, IPR007087, IPR015880	Krueppel-associated_box, Znf_C2H2, Znf_C2H2-like	Zfp952
ENSMUSG00000053411	IPR000953, IPR016197	Chromo/shadow_dom, Chromodomain-like	Cbx7
ENSMUSG00000053477	IPR011598	bHLH_dom	Tcf4
ENSMUSG00000053552	IPR002909	IPT	Ebf4
ENSMUSG00000053600	IPR001909, IPR007087, IPR015880	Krueppel-associated_box, Znf_C2H2, Znf_C2H2-like	Zfp472
ENSMUSG00000053646	IPR002909	IPT	Plxnb1
ENSMUSG00000053747	IPR009071	HMG_box_dom	Sox14
ENSMUSG00000053754	IPR000330, IPR000953, IPR016197	SNF2_N, Chromo/shadow_dom, Chromodomain-like	Chd8
ENSMUSG00000053877	IPR000330	SNF2_N	Srcap
ENSMUSG00000053909	IPR001356, IPR009057	Homeobox_dom, Homeodomain-like	Rhox10
ENSMUSG00000053950	IPR001356, IPR007087, IPR009057, IPR015880	Homeobox_dom, Znf_C2H2, Homeodomain-like, Znf_C2H2-like	Adnp2
ENSMUSG00000053985	IPR001909, IPR007087, IPR015880	Krueppel-associated_box, Znf_C2H2, Znf_C2H2-like	Zfp14
ENSMUSG00000054021	IPR003000	Sirtuin	Sirt5
ENSMUSG00000054051	IPR000330	SNF2_N	Ercc6
ENSMUSG00000054074	IPR009061	DNA-bd_dom_put	Skida1
ENSMUSG00000054117	IPR001594	Znf_DHHC_palmitoyltrfase	Zdhhc25
ENSMUSG00000054160	IPR001356, IPR009057	Homeobox_dom, Homeodomain-like	Nkx2-4
ENSMUSG00000054191	IPR007087, IPR015880	Znf_C2H2, Znf_C2H2-like	Klf1
ENSMUSG00000054199	IPR009057	Homeodomain-like	Gon4l
ENSMUSG00000054272	IPR003309, IPR007087, IPR015880	Tscrpt_reg_SCAN, Znf_C2H2, Znf_C2H2-like	Zscan4c
ENSMUSG00000054310	IPR001356, IPR009057	Homeobox_dom, Homeodomain-like	Obox1
ENSMUSG00000054321	IPR003894, IPR007900	TAFH_NHR1, TAF4	Taf4b
ENSMUSG00000054360	IPR001356, IPR009057	Homeobox_dom, Homeodomain-like	Bsx
ENSMUSG00000054381	IPR001909, IPR007087, IPR015880	Krueppel-associated_box, Znf_C2H2, Znf_C2H2-like	Zfp747
ENSMUSG00000054519	IPR001909, IPR007087, IPR015880	Krueppel-associated_box, Znf_C2H2, Znf_C2H2-like	Zfp867
ENSMUSG00000054611	IPR001965, IPR002857	Znf_PHD, Znf_CXXC	Kdm2a
ENSMUSG00000054648	IPR001909, IPR007087, IPR015880	Krueppel-associated_box, Znf_C2H2, Znf_C2H2-like	Zfp869
ENSMUSG00000054715	IPR003309, IPR007087, IPR015880	Tscrpt_reg_SCAN, Znf_C2H2, Znf_C2H2-like	Zscan22
ENSMUSG00000054716	IPR007087, IPR015880	Znf_C2H2, Znf_C2H2-like	Zfp771
ENSMUSG00000054717	IPR009071	HMG_box_dom	Hmgb2
ENSMUSG00000054728	IPR004018	RPEL_repeat	Phactr1
ENSMUSG00000054737	IPR001909, IPR007087, IPR015880	Krueppel-associated_box, Znf_C2H2, Znf_C2H2-like	Zfp182
ENSMUSG00000054792	IPR013069	BTB_POZ	Klhl18
ENSMUSG00000054823	IPR001214, IPR001965, IPR003616, IPR006560	SET_dom, Znf_PHD, Post-SET_dom, AWS_dom	Whsc1l1
ENSMUSG00000054893	IPR001909, IPR007087, IPR015880	Krueppel-associated_box, Znf_C2H2, Znf_C2H2-like	Zfp667
ENSMUSG00000054920	IPR013069	BTB_POZ	Klhl5
ENSMUSG00000054931	IPR003309, IPR007087, IPR015880	Tscrpt_reg_SCAN, Znf_C2H2, Znf_C2H2-like	Zkscan4
ENSMUSG00000054939	IPR003309, IPR007087, IPR015880	Tscrpt_reg_SCAN, Znf_C2H2, Znf_C2H2-like	Zfp174
ENSMUSG00000054967	IPR001909, IPR007087, IPR015880	Krueppel-associated_box, Znf_C2H2, Znf_C2H2-like	Zfp647
ENSMUSG00000055024	IPR000197, IPR009110, IPR010303, IPR014744	Znf_TAZ, Nuc_rcpt_coact, DUF902_CREBbp, Nuc_rcpt_coact_CREBbp	Ep300
ENSMUSG00000055027	IPR001214	SET_dom	Smyd1
ENSMUSG00000055053	IPR000647, IPR003619	CTF/NFI, MAD_homology1_Dwarfin-type	Nfic
ENSMUSG00000055067	IPR001214	SET_dom	Smyd3
ENSMUSG00000055102	IPR001909, IPR007087, IPR015880	Krueppel-associated_box, Znf_C2H2, Znf_C2H2-like	Zfp819
ENSMUSG00000055116	IPR001067, IPR011598	Nuc_translocat, bHLH_dom	Arntl
ENSMUSG00000055148	IPR007087, IPR015880	Znf_C2H2, Znf_C2H2-like	Klf2
ENSMUSG00000055150	IPR001909, IPR007087, IPR015880	Krueppel-associated_box, Znf_C2H2, Znf_C2H2-like	Zfp78
ENSMUSG00000055197	IPR000418	Ets_dom	Fev
ENSMUSG00000055202	IPR001909, IPR007087, IPR015880	Krueppel-associated_box, Znf_C2H2, Znf_C2H2-like	Zfp811
ENSMUSG00000055210	IPR001766	TF_fork_head	Foxd2
ENSMUSG00000055228	IPR001909, IPR007087, IPR015880	Krueppel-associated_box, Znf_C2H2, Znf_C2H2-like	Zfp935
ENSMUSG00000055239	IPR007087, IPR015880	Znf_C2H2, Znf_C2H2-like	Kcmf1
ENSMUSG00000055240	IPR001909, IPR007087, IPR015880	Krueppel-associated_box, Znf_C2H2, Znf_C2H2-like	Zfp101
ENSMUSG00000055305	IPR001909, IPR007087, IPR015880	Krueppel-associated_box, Znf_C2H2, Znf_C2H2-like	Zfp93
ENSMUSG00000055320	IPR000818, IPR016361	TEA/ATTS, TEF_metazoa	Tead1
ENSMUSG00000055341	IPR001909, IPR007087, IPR015880	Krueppel-associated_box, Znf_C2H2, Znf_C2H2-like	Zfp457
ENSMUSG00000055435	IPR004826, IPR004827, IPR008917	bZIP_Maf, bZIP, TF_DNA-bd	Maf
ENSMUSG00000055452	IPR000571	Znf_CCCH	Gm7353
ENSMUSG00000055480	IPR001909, IPR007087, IPR015880	Krueppel-associated_box, Znf_C2H2, Znf_C2H2-like	Zfp458
ENSMUSG00000055560	IPR001909, IPR007087, IPR015880	Krueppel-associated_box, Znf_C2H2, Znf_C2H2-like	Zfp459
ENSMUSG00000055633	IPR007087, IPR015880	Znf_C2H2, Znf_C2H2-like	Zfp580
ENSMUSG00000055639	IPR009061	DNA-bd_dom_put	Dach1
ENSMUSG00000055652	IPR013069	BTB_POZ	Klhl25
ENSMUSG00000055660	IPR002052	DNA_methylase_N6_adenine_CS	Mettl4
ENSMUSG00000055675	IPR013069	BTB_POZ	Kbtbd11
ENSMUSG00000055707	IPR013069	BTB_POZ	Klhl26
ENSMUSG00000055799	IPR009071, IPR013558	HMG_box_dom, CTNNB1-bd_N	Tcf7l1
ENSMUSG00000055817	IPR000679, IPR000949, IPR001005, IPR001025, IPR009057	Znf_GATA, ELM2_dom, SANT/Myb, BAH_dom, Homeodomain-like	Mta3
ENSMUSG00000055835	IPR001909, IPR007087, IPR015880	Krueppel-associated_box, Znf_C2H2, Znf_C2H2-like	Zfp1
ENSMUSG00000055874	IPR001766	TF_fork_head	Foxi3
ENSMUSG00000055917	IPR007087, IPR015880	Znf_C2H2, Znf_C2H2-like	Zfp277
ENSMUSG00000055942	IPR001356, IPR009057	Homeobox_dom, Homeodomain-like	Obox7
ENSMUSG00000055991	IPR001909, IPR003309, IPR007087, IPR015880	Krueppel-associated_box, Tscrpt_reg_SCAN, Znf_C2H2, Znf_C2H2-like	Zkscan5
ENSMUSG00000056014	IPR001909, IPR007087, IPR015880	Krueppel-associated_box, Znf_C2H2, Znf_C2H2-like	A430033K04Rik
ENSMUSG00000056019	IPR001909, IPR007087, IPR015880	Krueppel-associated_box, Znf_C2H2, Znf_C2H2-like	Zfp709
ENSMUSG00000056216	IPR004827	bZIP	Cebpg
ENSMUSG00000056300	IPR001909, IPR007087, IPR015880	Krueppel-associated_box, Znf_C2H2, Znf_C2H2-like	Gm13247
ENSMUSG00000056383	IPR001909, IPR007087, IPR015880	Krueppel-associated_box, Znf_C2H2, Znf_C2H2-like	AI987944
ENSMUSG00000056459	IPR007087, IPR013069, IPR015880	Znf_C2H2, BTB_POZ, Znf_C2H2-like	Zbtb25
ENSMUSG00000056476	IPR019035	Mediator_Med12	Med12l
ENSMUSG00000056493	IPR001766, IPR008984	TF_fork_head, SMAD_FHA_domain	Foxk1
ENSMUSG00000056501	IPR004827, IPR016468	bZIP, CCAAT/enhancer-binding	Cebpb
ENSMUSG00000056592	IPR001909, IPR007087, IPR015880	Krueppel-associated_box, Znf_C2H2, Znf_C2H2-like	Zfp658
ENSMUSG00000056608	IPR000330, IPR000953, IPR016197	SNF2_N, Chromo/shadow_dom, Chromodomain-like	Chd9
ENSMUSG00000056648	IPR000047, IPR001356, IPR001827, IPR009057	HTH_motif, Homeobox_dom, Homeobox_Antennapedia_CS, Homeodomain-like	Hoxb8
ENSMUSG00000056673	IPR001606, IPR001965, IPR004198, IPR013637	ARID_dom, Znf_PHD, Znf_C5HC2, Lys_sp_deMease_like_dom	Kdm5d
ENSMUSG00000056749	IPR004827, IPR010533, IPR016743	bZIP, Vert_IL3-reg_TF, NFIL3/E4BP4	Nfil3
ENSMUSG00000056758	IPR000116	HMGI/HMGY	Hmga2
ENSMUSG00000056770	IPR001214	SET_dom	Setd3
ENSMUSG00000056820	IPR002848	Translin	Tsnax
ENSMUSG00000056824	IPR001909, IPR007087, IPR015880	Krueppel-associated_box, Znf_C2H2, Znf_C2H2-like	Zfp663
ENSMUSG00000056829	IPR001766	TF_fork_head	Foxb2
ENSMUSG00000056854	IPR000327, IPR001356, IPR009057, IPR010982, IPR013847, IPR016362	POU_specific, Homeobox_dom, Homeodomain-like, Lambda_DNA-bd_dom, POU, TF_POU_3	Pou3f4
ENSMUSG00000056912	IPR000571	Znf_CCCH	1700017N19Rik
ENSMUSG00000057093	IPR001909, IPR007087, IPR015880	Krueppel-associated_box, Znf_C2H2, Znf_C2H2-like	C030039L03Rik
ENSMUSG00000057098	IPR002909	IPT	Ebf1
ENSMUSG00000057101	IPR007087, IPR015880	Znf_C2H2, Znf_C2H2-like	Zfp180
ENSMUSG00000057103	IPR000182	GNAT_dom	Cml1
ENSMUSG00000057133	IPR000330, IPR000953, IPR016197	SNF2_N, Chromo/shadow_dom, Chromodomain-like	Chd6
ENSMUSG00000057156	IPR001356, IPR008422, IPR009057	Homeobox_dom, Homeobox_KN_domain, Homeodomain-like	Homez
ENSMUSG00000057173	IPR003150	DNA-bd_RFX	Rfx8
ENSMUSG00000057335	IPR008984	SMAD_FHA_domain	Cep170
ENSMUSG00000057396	IPR001909, IPR007087, IPR015880	Krueppel-associated_box, Znf_C2H2, Znf_C2H2-like	Zfp759
ENSMUSG00000057406	IPR001214, IPR001965, IPR003616, IPR006560, IPR009071	SET_dom, Znf_PHD, Post-SET_dom, AWS_dom, HMG_box_dom	Whsc1
ENSMUSG00000057409	IPR001909, IPR007087, IPR015880	Krueppel-associated_box, Znf_C2H2, Znf_C2H2-like	Zfp53
ENSMUSG00000057469	IPR003316	E2F_WHTH_DNA-bd_dom	E2f6
ENSMUSG00000057522	IPR013069	BTB_POZ	Spop
ENSMUSG00000057551	IPR001909, IPR007087, IPR015880	Krueppel-associated_box, Znf_C2H2, Znf_C2H2-like	Zfp317
ENSMUSG00000057637	IPR001214, IPR007087, IPR009170, IPR015880	SET_dom, Znf_C2H2, RIZ_retinblastoma-bd_prot, Znf_C2H2-like	Prdm2
ENSMUSG00000057691	IPR001909, IPR007087, IPR015880	Krueppel-associated_box, Znf_C2H2, Znf_C2H2-like	Zfp746
ENSMUSG00000057835	IPR001909, IPR007087, IPR015880	Krueppel-associated_box, Znf_C2H2, Znf_C2H2-like	Zfp119a
ENSMUSG00000057842	IPR001909, IPR007087, IPR015880	Krueppel-associated_box, Znf_C2H2, Znf_C2H2-like	Zfp595
ENSMUSG00000057894	IPR007087, IPR015880	Znf_C2H2, Znf_C2H2-like	Zfp329
ENSMUSG00000057895	IPR007087, IPR015880	Znf_C2H2, Znf_C2H2-like	Zfp105
ENSMUSG00000057982	IPR001909, IPR007087, IPR015880	Krueppel-associated_box, Znf_C2H2, Znf_C2H2-like	Zfp809
ENSMUSG00000058005	IPR013069	BTB_POZ	Tdpoz3
ENSMUSG00000058028	IPR003309, IPR007087, IPR015880	Tscrpt_reg_SCAN, Znf_C2H2, Znf_C2H2-like	Zscan5b
ENSMUSG00000058093	IPR001909, IPR001965, IPR007087, IPR015880	Krueppel-associated_box, Znf_PHD, Znf_C2H2, Znf_C2H2-like	Zfp729b
ENSMUSG00000058145	IPR007087	Znf_C2H2	Adamts17
ENSMUSG00000058186	IPR001909, IPR007087, IPR015880	Krueppel-associated_box, Znf_C2H2, Znf_C2H2-like	Gm13242
ENSMUSG00000058192	IPR001909, IPR007087, IPR015880	Krueppel-associated_box, Znf_C2H2, Znf_C2H2-like	Zfp846
ENSMUSG00000058239	IPR011598	bHLH_dom	Usf2
ENSMUSG00000058246	IPR001909	Krueppel-associated_box	Gm10037
ENSMUSG00000058291	IPR001909, IPR007087, IPR015880	Krueppel-associated_box, Znf_C2H2, Znf_C2H2-like	Zfp68
ENSMUSG00000058318	IPR001965	Znf_PHD	Phf21a
ENSMUSG00000058331	IPR001909, IPR007087, IPR015880	Krueppel-associated_box, Znf_C2H2, Znf_C2H2-like	Zfp85
ENSMUSG00000058402	IPR007087, IPR015880	Znf_C2H2, Znf_C2H2-like	Zfp420
ENSMUSG00000058447	IPR001909	Krueppel-associated_box	Gm26920
ENSMUSG00000058537	IPR001356, IPR009057	Homeobox_dom, Homeodomain-like	AW822073
ENSMUSG00000058638	IPR001909, IPR003309, IPR007087, IPR015880	Krueppel-associated_box, Tscrpt_reg_SCAN, Znf_C2H2, Znf_C2H2-like	Zfp110
ENSMUSG00000058665	IPR000747, IPR001356, IPR009057	Homeodomain_engrailed, Homeobox_dom, Homeodomain-like	En1
ENSMUSG00000058669	IPR001356, IPR009057	Homeobox_dom, Homeodomain-like	Nkx2-9
ENSMUSG00000058670	IPR001005, IPR009057	SANT/Myb, Homeodomain-like	4932411N23Rik
ENSMUSG00000058748	IPR001909, IPR007087, IPR015880	Krueppel-associated_box, Znf_C2H2, Znf_C2H2-like	Zfp958
ENSMUSG00000058756	IPR000536, IPR001628, IPR001723, IPR001728, IPR008946	Nucl_hrmn_rcpt_lig-bd_core, Znf_hrmn_rcpt, Str_hrmn_rcpt, ThyrH_rcpt, Nucl_hormone_rcpt_ligand-bd	Thra
ENSMUSG00000058794	IPR004826, IPR004827, IPR008917	bZIP_Maf, bZIP, TF_DNA-bd	Nfe2
ENSMUSG00000058881	IPR007087, IPR015880	Znf_C2H2, Znf_C2H2-like	Zfp516
ENSMUSG00000058883	IPR001909, IPR007087, IPR015880	Krueppel-associated_box, Znf_C2H2, Znf_C2H2-like	Zfp708
ENSMUSG00000058886	IPR000770, IPR010919	SAND_dom, SAND_dom-like	Deaf1
ENSMUSG00000058900	IPR001909, IPR007087, IPR015880	Krueppel-associated_box, Znf_C2H2, Znf_C2H2-like	Rsl1
ENSMUSG00000059142	IPR001909, IPR007087, IPR015880	Krueppel-associated_box, Znf_C2H2, Znf_C2H2-like	Zfp945
ENSMUSG00000059246	IPR001766	TF_fork_head	Foxb1
ENSMUSG00000059273	IPR000571	Znf_CCCH	Zc3h4
ENSMUSG00000059288	IPR000953, IPR016197	Chromo/shadow_dom, Chromodomain-like	Cdyl
ENSMUSG00000059325	IPR001356, IPR009057	Homeobox_dom, Homeodomain-like	Hopx
ENSMUSG00000059334	IPR000571	Znf_CCCH	Zfp36l3
ENSMUSG00000059423	IPR001909, IPR007087, IPR015880	Krueppel-associated_box, Znf_C2H2, Znf_C2H2-like	Zfp933
ENSMUSG00000059436	IPR011598	bHLH_dom	Max
ENSMUSG00000059474	IPR004092	Mbt	Mbtd1
ENSMUSG00000059475	IPR001909, IPR007087, IPR015880	Krueppel-associated_box, Znf_C2H2, Znf_C2H2-like	Zfp426
ENSMUSG00000059486	IPR013069	BTB_POZ	Kbtbd2
ENSMUSG00000059518	IPR007529	Znf_HIT	Znhit1
ENSMUSG00000059540	IPR001222, IPR006289, IPR016492	Znf_TFIIS, TFSII, TF_IIS-rel	Tcea2
ENSMUSG00000059552	IPR002117, IPR008967, IPR011615	p53_tumour_suppressor, p53-like_TF_DNA-bd, p53_DNA-bd	Trp53
ENSMUSG00000059586	IPR004181	Znf_MIZ	Nsmce2
ENSMUSG00000059625	IPR011598	bHLH_dom	Sohlh1
ENSMUSG00000059626	IPR001356, IPR009057	Homeobox_dom, Homeodomain-like	Rhox3e
ENSMUSG00000059689	IPR007087, IPR015880	Znf_C2H2, Znf_C2H2-like	Zfp637
ENSMUSG00000059824	IPR004827	bZIP	Dbp
ENSMUSG00000059839	IPR001909, IPR007087, IPR015880	Krueppel-associated_box, Znf_C2H2, Znf_C2H2-like	Zfp874b
ENSMUSG00000059842	IPR007087, IPR015880	Znf_C2H2, Znf_C2H2-like	Zfp341
ENSMUSG00000059851	IPR001214	SET_dom	Suv420h2
ENSMUSG00000059878	IPR007087, IPR015880	Znf_C2H2, Znf_C2H2-like	Zfp422
ENSMUSG00000059897	IPR001909, IPR007087, IPR015880	Krueppel-associated_box, Znf_C2H2, Znf_C2H2-like	Zfp930
ENSMUSG00000059975	IPR001909, IPR007087, IPR015880	Krueppel-associated_box, Znf_C2H2, Znf_C2H2-like	Zfp74
ENSMUSG00000059995	IPR013243, IPR013246	SCA7_dom, SAGA_su_Sgf11	Atxn7l3
ENSMUSG00000060012	IPR008984	SMAD_FHA_domain	Kif13b
ENSMUSG00000060093	IPR004823	TAF_TATA-bd	Hist1h4a
ENSMUSG00000060166	IPR001594	Znf_DHHC_palmitoyltrfase	Zdhhc8
ENSMUSG00000060206	IPR007087, IPR015880	Znf_C2H2, Znf_C2H2-like	Zfp462
ENSMUSG00000060256	IPR013069	BTB_POZ	Tdpoz4
ENSMUSG00000060257	IPR007087, IPR015880	Znf_C2H2, Znf_C2H2-like	Scrt2
ENSMUSG00000060284	IPR007087, IPR015880	Znf_C2H2, Znf_C2H2-like	Sp7
ENSMUSG00000060301	IPR001909, IPR007087, IPR015880	Krueppel-associated_box, Znf_C2H2, Znf_C2H2-like	2610008E11Rik
ENSMUSG00000060314	IPR001909, IPR007087, IPR015880	Krueppel-associated_box, Znf_C2H2, Znf_C2H2-like	Zfp941
ENSMUSG00000060336	IPR001909, IPR007087, IPR015880	Krueppel-associated_box, Znf_C2H2, Znf_C2H2-like	Zfp937
ENSMUSG00000060397	IPR001909, IPR007087, IPR015880	Krueppel-associated_box, Znf_C2H2, Znf_C2H2-like	Zfp128
ENSMUSG00000060427	IPR001909, IPR007087, IPR015880	Krueppel-associated_box, Znf_C2H2, Znf_C2H2-like	Zfp868
ENSMUSG00000060508	IPR000953, IPR008251, IPR016197	Chromo/shadow_dom, Chromo_shadow_dom, Chromodomain-like	Nlrp9b
ENSMUSG00000060510	IPR001909, IPR007087, IPR015880	Krueppel-associated_box, Znf_C2H2, Znf_C2H2-like	Zfp266
ENSMUSG00000060601	IPR000536, IPR001628, IPR001723, IPR008946	Nucl_hrmn_rcpt_lig-bd_core, Znf_hrmn_rcpt, Str_hrmn_rcpt, Nucl_hormone_rcpt_ligand-bd	Nr1h2
ENSMUSG00000060630	IPR001909, IPR007087, IPR015880	Krueppel-associated_box, Znf_C2H2, Znf_C2H2-like	Zfp735
ENSMUSG00000060639	IPR004823	TAF_TATA-bd	Hist1h4i
ENSMUSG00000060678	IPR004823	TAF_TATA-bd	Hist1h4c
ENSMUSG00000060862	IPR007087, IPR013069, IPR015880	Znf_C2H2, BTB_POZ, Znf_C2H2-like	Zbtb40
ENSMUSG00000060969	IPR001356, IPR003893, IPR008422, IPR009057	Homeobox_dom, Iroquois_homeo, Homeobox_KN_domain, Homeodomain-like	Irx1
ENSMUSG00000060981	IPR004823	TAF_TATA-bd	Hist1h4h
ENSMUSG00000061013	IPR001356, IPR008422, IPR009057	Homeobox_dom, Homeobox_KN_domain, Homeodomain-like	Mkx
ENSMUSG00000061062	IPR000286, IPR003084	His_deacetylse, His_deacetylse_1	Gm10093
ENSMUSG00000061079	IPR007087, IPR015880	Znf_C2H2, Znf_C2H2-like	Zfp143
ENSMUSG00000061104	IPR010516, IPR017250	SAP18, Hist_deAcase_cplx_SAP18	Gm10094
ENSMUSG00000061186	IPR004092	Mbt	Sfmbt2
ENSMUSG00000061360	IPR005345	PHF5	Phf5a
ENSMUSG00000061371	IPR007087, IPR015880	Znf_C2H2, Znf_C2H2-like	Zfp873
ENSMUSG00000061374	IPR007087, IPR015880	Znf_C2H2, Znf_C2H2-like	Fiz1
ENSMUSG00000061482	IPR004823	TAF_TATA-bd	Hist1h4d
ENSMUSG00000061517	IPR009071	HMG_box_dom	Sox21
ENSMUSG00000061524	IPR007087, IPR015880	Znf_C2H2, Znf_C2H2-like	Zic2
ENSMUSG00000061544	IPR001909, IPR007087, IPR015880	Krueppel-associated_box, Znf_C2H2, Znf_C2H2-like	Zfp229
ENSMUSG00000061589	IPR013110	DOT1_dom_Pfam	Dot1l
ENSMUSG00000061607	IPR008984	SMAD_FHA_domain	Mdc1
ENSMUSG00000061613	IPR000571	Znf_CCCH	U2af1
ENSMUSG00000061809	IPR000814	TBP	Tbpl2
ENSMUSG00000061887	IPR008116	SSDP_DNA-bd	Ssbp3
ENSMUSG00000061894	IPR001005, IPR003309, IPR007087, IPR015880	SANT/Myb, Tscrpt_reg_SCAN, Znf_C2H2, Znf_C2H2-like	Zscan20
ENSMUSG00000061898	IPR001909, IPR007087, IPR015880	Krueppel-associated_box, Znf_C2H2, Znf_C2H2-like	Rbak
ENSMUSG00000061911	IPR002515, IPR013681	Znf_C2HC, Myelin_TF	Myt1l
ENSMUSG00000061969	IPR001909, IPR007087, IPR015880	Krueppel-associated_box, Znf_C2H2, Znf_C2H2-like	Gm5581
ENSMUSG00000061979	IPR000408	Reg_chr_condens	Wbscr16
ENSMUSG00000062012	IPR001909, IPR007087, IPR015880	Krueppel-associated_box, Znf_C2H2, Znf_C2H2-like	Zfp13
ENSMUSG00000062040	IPR001909, IPR007087, IPR015880	Krueppel-associated_box, Znf_C2H2, Znf_C2H2-like	Zfp27
ENSMUSG00000062098	IPR013069	BTB_POZ	Btbd3
ENSMUSG00000062101	IPR001909, IPR007087, IPR015880	Krueppel-associated_box, Znf_C2H2, Znf_C2H2-like	Zfp119b
ENSMUSG00000062115	IPR001965	Znf_PHD	Rai1
ENSMUSG00000062116	IPR001909, IPR007087, IPR015880	Krueppel-associated_box, Znf_C2H2, Znf_C2H2-like	Zfp954
ENSMUSG00000062175	IPR001356, IPR008422, IPR009057	Homeobox_dom, Homeobox_KN_domain, Homeodomain-like	Tgif2
ENSMUSG00000062202	IPR013069	BTB_POZ	Btbd9
ENSMUSG00000062270	IPR000953, IPR008676, IPR016197	Chromo/shadow_dom, MRG, Chromodomain-like	Morf4l1
ENSMUSG00000062327	IPR001699, IPR002070, IPR008967	TF_T-box, TF_Brachyury, p53-like_TF_DNA-bd	T
ENSMUSG00000062518	IPR001909, IPR007087, IPR015880	Krueppel-associated_box, Znf_C2H2, Znf_C2H2-like	Zfp534
ENSMUSG00000062519	IPR001909, IPR007087, IPR015880	Krueppel-associated_box, Znf_C2H2, Znf_C2H2-like	Zfp398
ENSMUSG00000062627	IPR001005, IPR009057	SANT/Myb, Homeodomain-like	Mysm1
ENSMUSG00000062713	IPR010578, IPR011598	SIM_C, bHLH_dom	Sim2
ENSMUSG00000062743	IPR001909, IPR007087, IPR015880	Krueppel-associated_box, Znf_C2H2, Znf_C2H2-like	Zfp677
ENSMUSG00000062761	IPR007087, IPR015880	Znf_C2H2, Znf_C2H2-like	Zfp512
ENSMUSG00000062794	IPR001909, IPR007087, IPR015880	Krueppel-associated_box, Znf_C2H2, Znf_C2H2-like	Zfp599
ENSMUSG00000062814	IPR001909, IPR003655	Krueppel-associated_box, Krueppel-associated_box-rel	Ssxa1
ENSMUSG00000062861	IPR001909, IPR007087, IPR015880	Krueppel-associated_box, Znf_C2H2, Znf_C2H2-like	Zfp28
ENSMUSG00000062866	IPR004018	RPEL_repeat	Phactr2
ENSMUSG00000062901	IPR013069	BTB_POZ	Klhl24
ENSMUSG00000062906	IPR000286	His_deacetylse	Hdac10
ENSMUSG00000062931	IPR001909, IPR007087, IPR015880	Krueppel-associated_box, Znf_C2H2, Znf_C2H2-like	Zfp938
ENSMUSG00000062939	IPR008967, IPR013801, IPR015988	p53-like_TF_DNA-bd, STAT_TF_DNA-bd, STAT_TF_coiled-coil	Stat4
ENSMUSG00000062944	IPR007087, IPR015880	Znf_C2H2, Znf_C2H2-like	9130023H24Rik
ENSMUSG00000063047	IPR001909, IPR007087, IPR015880	Krueppel-associated_box, Znf_C2H2, Znf_C2H2-like	Zfp780b
ENSMUSG00000063049	IPR001965	Znf_PHD	Ing2
ENSMUSG00000063060	IPR009071	HMG_box_dom	Sox7
ENSMUSG00000063077	IPR008984	SMAD_FHA_domain	Kif1b
ENSMUSG00000063108	IPR001909, IPR007087, IPR015880	Krueppel-associated_box, Znf_C2H2, Znf_C2H2-like	Zfp26
ENSMUSG00000063179	IPR013641	Chromatin_KTI12	Pstk
ENSMUSG00000063245	IPR001909, IPR007087, IPR015880	Krueppel-associated_box, Znf_C2H2, Znf_C2H2-like	Gm13248
ENSMUSG00000063281	IPR007087, IPR015880	Znf_C2H2, Znf_C2H2-like	Zfp35
ENSMUSG00000063364	IPR001909	Krueppel-associated_box	3300002I08Rik
ENSMUSG00000063383	IPR001909, IPR007087, IPR015880	Krueppel-associated_box, Znf_C2H2, Znf_C2H2-like	Zfp947
ENSMUSG00000063445	IPR008030	NmrA-like	Nmral1
ENSMUSG00000063488	IPR003309, IPR007087, IPR015880	Tscrpt_reg_SCAN, Znf_C2H2, Znf_C2H2-like	Zkscan7
ENSMUSG00000063535	IPR001909, IPR007087, IPR015880	Krueppel-associated_box, Znf_C2H2, Znf_C2H2-like	Zfp773
ENSMUSG00000063568	IPR007087, IPR015880	Znf_C2H2, Znf_C2H2-like	Jazf1
ENSMUSG00000063632	IPR009071	HMG_box_dom	Sox11
ENSMUSG00000063659	IPR007087, IPR013069, IPR015880	Znf_C2H2, BTB_POZ, Znf_C2H2-like	Zbtb18
ENSMUSG00000063672	IPR000047, IPR001356, IPR009057	HTH_motif, Homeobox_dom, Homeodomain-like	Nkx6-3
ENSMUSG00000063804	IPR002059, IPR011129	CSP_DNA-bd, Cold_shock_prot	Lin28b
ENSMUSG00000063870	IPR000330, IPR000953, IPR001965, IPR012957, IPR012958, IPR016197	SNF2_N, Chromo/shadow_dom, Znf_PHD, CHD_C2, CHD_N, Chromodomain-like	Chd4
ENSMUSG00000063889	IPR001630, IPR004827	Leuzip_CREB, bZIP	Crem
ENSMUSG00000063894	IPR001909, IPR003309, IPR007087, IPR015880	Krueppel-associated_box, Tscrpt_reg_SCAN, Znf_C2H2, Znf_C2H2-like	Zkscan8
ENSMUSG00000063905	IPR007087, IPR015880	Znf_C2H2, Znf_C2H2-like	Gm10139
ENSMUSG00000063952	IPR001965	Znf_PHD	Brpf3
ENSMUSG00000063972	IPR000536, IPR001628, IPR001723, IPR008946	Nucl_hrmn_rcpt_lig-bd_core, Znf_hrmn_rcpt, Str_hrmn_rcpt, Nucl_hormone_rcpt_ligand-bd	Nr6a1
ENSMUSG00000064127	IPR013947	Mediator_Med14	Med14
ENSMUSG00000064137	IPR001356, IPR009057	Homeobox_dom, Homeodomain-like	Rhox8
ENSMUSG00000064141	IPR001909, IPR007087, IPR015880	Krueppel-associated_box, Znf_C2H2, Znf_C2H2-like	Zfp69
ENSMUSG00000064194	IPR001909, IPR007087, IPR015880	Krueppel-associated_box, Znf_C2H2, Znf_C2H2-like	Zfp936
ENSMUSG00000064264	IPR007087	Znf_C2H2	Zfp428
ENSMUSG00000064288	IPR004823	TAF_TATA-bd	Hist1h4k
ENSMUSG00000065999	IPR001909, IPR007087, IPR015880	Krueppel-associated_box, Znf_C2H2, Znf_C2H2-like	Gm13154
ENSMUSG00000066000	IPR001909, IPR007087, IPR015880	Krueppel-associated_box, Znf_C2H2, Znf_C2H2-like	2610305D13Rik
ENSMUSG00000066007	IPR001909, IPR007087, IPR015880	Krueppel-associated_box, Znf_C2H2, Znf_C2H2-like	Zfp600
ENSMUSG00000066009	IPR001909, IPR007087, IPR015880	Krueppel-associated_box, Znf_C2H2, Znf_C2H2-like	Gm13051
ENSMUSG00000066043	IPR004018	RPEL_repeat	Phactr4
ENSMUSG00000066224	IPR001606	ARID_dom	Arid3c
ENSMUSG00000066456	IPR000079	HMGN_fam	Hmgn3
ENSMUSG00000066551	IPR009071	HMG_box_dom	Hmgb1
ENSMUSG00000066613	IPR001909, IPR007087, IPR015880	Krueppel-associated_box, Znf_C2H2, Znf_C2H2-like	Zfp932
ENSMUSG00000066687	IPR007087, IPR013069, IPR015880	Znf_C2H2, BTB_POZ, Znf_C2H2-like	Zbtb16
ENSMUSG00000066721	IPR007087, IPR015880	Znf_C2H2, Znf_C2H2-like	Zfp575
ENSMUSG00000066772	IPR001356, IPR009057	Homeobox_dom, Homeodomain-like	Obox3
ENSMUSG00000066797	IPR007087, IPR015880	Znf_C2H2, Znf_C2H2-like	Zfp648
ENSMUSG00000066798	IPR007087, IPR013069, IPR015880	Znf_C2H2, BTB_POZ, Znf_C2H2-like	Zbtb6
ENSMUSG00000066829	IPR001909, IPR007087, IPR015880	Krueppel-associated_box, Znf_C2H2, Znf_C2H2-like	Zfp810
ENSMUSG00000066838	IPR001909, IPR007087, IPR015880	Krueppel-associated_box, Znf_C2H2, Znf_C2H2-like	Zfp772
ENSMUSG00000066880	IPR001909, IPR007087, IPR015880	Krueppel-associated_box, Znf_C2H2, Znf_C2H2-like	Zfp617
ENSMUSG00000066900	IPR013907	Sds3	Suds3
ENSMUSG00000067071	IPR003650, IPR011598	Orange, bHLH_dom	Hes6
ENSMUSG00000067148	IPR001514, IPR009025, IPR011263	DNA-dir_RNA_pol_30-40kDasu_CS, RBP11-like_dimer, DNA-dir_RNA_pol_RpoA/D/Rpb3	Polr1c
ENSMUSG00000067261	IPR001766	TF_fork_head	Foxd3
ENSMUSG00000067424	IPR001909, IPR007087, IPR015880	Krueppel-associated_box, Znf_C2H2, Znf_C2H2-like	Zfp563
ENSMUSG00000067430	IPR001909, IPR007087, IPR015880	Krueppel-associated_box, Znf_C2H2, Znf_C2H2-like	Zfp763
ENSMUSG00000067438	IPR001356, IPR009057	Homeobox_dom, Homeodomain-like	Hmx1
ENSMUSG00000067455	IPR004823	TAF_TATA-bd	Hist1h4j
ENSMUSG00000067567	IPR000286, IPR003084	His_deacetylse, His_deacetylse_1	Hdac8
ENSMUSG00000067724	IPR001356, IPR009057	Homeobox_dom, Homeodomain-like	Gbx1
ENSMUSG00000067860	IPR007087, IPR015880	Znf_C2H2, Znf_C2H2-like	Zic3
ENSMUSG00000067916	IPR001909, IPR007087, IPR015880	Krueppel-associated_box, Znf_C2H2, Znf_C2H2-like	Gm13139
ENSMUSG00000067919	IPR001909, IPR007087, IPR015880	Krueppel-associated_box, Znf_C2H2, Znf_C2H2-like	Rex2
ENSMUSG00000067928	IPR001909, IPR007087, IPR015880	Krueppel-associated_box, Znf_C2H2, Znf_C2H2-like	Zfp760
ENSMUSG00000067929	IPR007087, IPR015880	Znf_C2H2, Znf_C2H2-like	Gm10226
ENSMUSG00000067931	IPR001909, IPR007087, IPR015880	Krueppel-associated_box, Znf_C2H2, Znf_C2H2-like	Zfp948
ENSMUSG00000067942	IPR001909, IPR007087, IPR015880	Krueppel-associated_box, Znf_C2H2, Znf_C2H2-like	Zfp160
ENSMUSG00000068036	IPR008984	SMAD_FHA_domain	Mllt4
ENSMUSG00000068048	IPR001356, IPR009057	Homeobox_dom, Homeodomain-like	Rhox9
ENSMUSG00000068079	IPR011598	bHLH_dom	Tcf15
ENSMUSG00000068130	IPR001909, IPR007087, IPR015880	Krueppel-associated_box, Znf_C2H2, Znf_C2H2-like	Zfp442
ENSMUSG00000068134	IPR001909, IPR007087, IPR015880	Krueppel-associated_box, Znf_C2H2, Znf_C2H2-like	Zfp120
ENSMUSG00000068154	IPR007087, IPR015880	Znf_C2H2, Znf_C2H2-like	Insm1
ENSMUSG00000068218	IPR001909, IPR003655	Krueppel-associated_box, Krueppel-associated_box-rel	Ssxb9
ENSMUSG00000068219	IPR001909, IPR003655	Krueppel-associated_box, Krueppel-associated_box-rel	Ssxb10
ENSMUSG00000068245	IPR001965	Znf_PHD	Phf11d
ENSMUSG00000068267	IPR007889, IPR009057	HTH_Psq, Homeodomain-like	Cenpb
ENSMUSG00000068284	IPR011598	bHLH_dom	Gm608
ENSMUSG00000068299	IPR000182	GNAT_dom	1700019G17Rik
ENSMUSG00000068302	IPR001356, IPR009057	Homeobox_dom, Homeodomain-like	Noto
ENSMUSG00000068327	IPR001356, IPR009057	Homeobox_dom, Homeodomain-like	Tlx2
ENSMUSG00000068391	IPR003958	CBFA_NFYB_domain	Chrac1
ENSMUSG00000068551	IPR007087, IPR015880	Znf_C2H2, Znf_C2H2-like	Zfp467
ENSMUSG00000068823	IPR002059, IPR011129	CSP_DNA-bd, Cold_shock_prot	Csde1
ENSMUSG00000068859	IPR007087, IPR015880	Znf_C2H2, Znf_C2H2-like	Sp9
ENSMUSG00000068879	IPR013069	BTB_POZ	Gm5773
ENSMUSG00000068959	IPR001909, IPR007087, IPR015880	Krueppel-associated_box, Znf_C2H2, Znf_C2H2-like	Zfp619
ENSMUSG00000068962	IPR001909, IPR007087, IPR015880	Krueppel-associated_box, Znf_C2H2, Znf_C2H2-like	Zfp114
ENSMUSG00000068966	IPR007087, IPR013069, IPR015880	Znf_C2H2, BTB_POZ, Znf_C2H2-like	Zbtb34
ENSMUSG00000069036	IPR009071	HMG_box_dom	Sry
ENSMUSG00000069114	IPR007087, IPR013069, IPR015880	Znf_C2H2, BTB_POZ, Znf_C2H2-like	Zbtb10
ENSMUSG00000069171	IPR000536, IPR001628, IPR001723, IPR003068, IPR008946	Nucl_hrmn_rcpt_lig-bd_core, Znf_hrmn_rcpt, Str_hrmn_rcpt, COUP_TF, Nucl_hormone_rcpt_ligand-bd	Nr2f1
ENSMUSG00000069184	IPR001909, IPR007087, IPR015880	Krueppel-associated_box, Znf_C2H2, Znf_C2H2-like	Zfp72
ENSMUSG00000069189	IPR001594	Znf_DHHC_palmitoyltrfase	Zdhhc11
ENSMUSG00000069206	IPR001909, IPR007087, IPR015880	Krueppel-associated_box, Znf_C2H2, Znf_C2H2-like	Zfp874a
ENSMUSG00000069208	IPR001909, IPR007087, IPR015880	Krueppel-associated_box, Znf_C2H2, Znf_C2H2-like	Zfp825
ENSMUSG00000069266	IPR004823	TAF_TATA-bd	Hist1h4b
ENSMUSG00000069274	IPR004823	TAF_TATA-bd	Hist1h4f
ENSMUSG00000069305	IPR004823	TAF_TATA-bd	Hist1h4n
ENSMUSG00000069306	IPR004823	TAF_TATA-bd	Hist1h4m
ENSMUSG00000069378	IPR001214, IPR007087, IPR015880	SET_dom, Znf_C2H2, Znf_C2H2-like	Prdm6
ENSMUSG00000069475	IPR007087	Znf_C2H2	Gm6020
ENSMUSG00000069476	IPR001909, IPR007087, IPR015880	Krueppel-associated_box, Znf_C2H2, Znf_C2H2-like	Zfp616
ENSMUSG00000069495	IPR009607	Enhancer_polycomb_C	Epc2
ENSMUSG00000069727	IPR001909, IPR007087, IPR015880	Krueppel-associated_box, Znf_C2H2, Znf_C2H2-like	Gm5595
ENSMUSG00000069729	IPR001606	ARID_dom	Arid1b
ENSMUSG00000069743	IPR001909, IPR007087, IPR015880	Krueppel-associated_box, Znf_C2H2, Znf_C2H2-like	Zfp820
ENSMUSG00000069755	IPR007087, IPR015880	Znf_C2H2, Znf_C2H2-like	Zfp125
ENSMUSG00000069835	IPR000182	GNAT_dom	Sat2
ENSMUSG00000069895	IPR013723	Ataxin-1_HBP1	Atxn1l
ENSMUSG00000070003	IPR008116	SSDP_DNA-bd	Ssbp4
ENSMUSG00000070031	IPR000770, IPR001965, IPR010919	SAND_dom, Znf_PHD, SAND_dom-like	Sp140
ENSMUSG00000070034	IPR000770, IPR010919	SAND_dom, SAND_dom-like	Sp110
ENSMUSG00000070345	IPR000232	HSF_DNA-bd	Hsf5
ENSMUSG00000070420	IPR003309, IPR007087, IPR015880	Tscrpt_reg_SCAN, Znf_C2H2, Znf_C2H2-like	Zscan25
ENSMUSG00000070495	IPR007087, IPR015880	Znf_C2H2, Znf_C2H2-like	Ctcfl
[truncated: 403 more rows]

## Sheet: Danio_TF
Ensembl Gene ID	combined	combined description	Associated Gene Name
ENSDARG00000000151	IPR000536, IPR001628, IPR001723, IPR001728, IPR008946	Nucl_hrmn_rcpt_lig-bd_core, Znf_hrmn_rcpt, Str_hrmn_rcpt, ThyrH_rcpt, Nucl_hormone_rcpt_ligand-bd	thraa
ENSDARG00000000175	IPR001356, IPR001827, IPR009057	Homeobox_dom, Homeobox_Antennapedia_CS, Homeodomain-like	hoxb2a
ENSDARG00000000476	IPR009071	HMG_box_dom	pms1
ENSDARG00000000542	IPR013137	Znf_TFIIB	gtf2e1
ENSDARG00000000567	IPR007087, IPR015880	Znf_C2H2, Znf_C2H2-like	znf281a
ENSDARG00000000729	IPR005012	Daxx	daxx
ENSDARG00000000760	IPR007087, IPR015880	Znf_C2H2, Znf_C2H2-like	znf511
ENSDARG00000000767	IPR000418	Ets_dom	spi1b
ENSDARG00000000796	IPR000536, IPR001628, IPR001723, IPR003070, IPR008946	Nucl_hrmn_rcpt_lig-bd_core, Znf_hrmn_rcpt, Str_hrmn_rcpt, Nuc_orph_rcpt, Nucl_hormone_rcpt_ligand-bd	nr4a1
ENSDARG00000000935	IPR000571	Znf_CCCH	unk
ENSDARG00000000943	IPR007087	Znf_C2H2	dzip1
ENSDARG00000000966	IPR001005, IPR009057	SANT/Myb, Homeodomain-like	ncor2
ENSDARG00000001015	IPR007087, IPR015880	Znf_C2H2, Znf_C2H2-like	znf384l
ENSDARG00000001210	IPR006612	Znf_C2CH	arl14ep
ENSDARG00000001220	IPR000408	Reg_chr_condens	mycbp2
ENSDARG00000001313	IPR001965	Znf_PHD	g2e3
ENSDARG00000001447	IPR000949, IPR001005, IPR009057	ELM2_dom, SANT/Myb, Homeodomain-like	mier1b
ENSDARG00000001549	IPR007087, IPR015880	Znf_C2H2, Znf_C2H2-like	sp3a
ENSDARG00000001621	IPR001289	TF_CBFB	nfyal
ENSDARG00000001785	IPR001356, IPR003893, IPR008422, IPR009057	Homeobox_dom, Iroquois_homeo, Homeobox_KN_domain, Homeodomain-like	irx2a
ENSDARG00000001857	IPR007797	TF_AF4/FMR2	aff4
ENSDARG00000001859	IPR000047, IPR001356, IPR009057	HTH_motif, Homeobox_dom, Homeodomain-like	dbx1b
ENSDARG00000001882	IPR013069	BTB_POZ	kbtbd12
ENSDARG00000001910	IPR000536, IPR001628, IPR001723, IPR003079, IPR008946	Nucl_hrmn_rcpt_lig-bd_core, Znf_hrmn_rcpt, Str_hrmn_rcpt, ROR_rcpt, Nucl_hormone_rcpt_ligand-bd	rorab
ENSDARG00000001930	IPR013069	BTB_POZ	klhl15
ENSDARG00000001940	IPR001005, IPR009057	SANT/Myb, Homeodomain-like	dnajc1
ENSDARG00000002006	IPR000003, IPR000536, IPR001628, IPR001723, IPR008946	Retinoid-X_rcpt/HNF4, Nucl_hrmn_rcpt_lig-bd_core, Znf_hrmn_rcpt, Str_hrmn_rcpt, Nucl_hormone_rcpt_ligand-bd	rxrbb
ENSDARG00000002031	IPR009071	HMG_box_dom	tox4a
ENSDARG00000002060	IPR013137	Znf_TFIIB	brf2
ENSDARG00000002196	IPR004826, IPR004827, IPR008917, IPR013069	bZIP_Maf, bZIP, TF_DNA-bd, BTB_POZ	bach1b
ENSDARG00000002216	IPR001699, IPR002070, IPR008967	TF_T-box, TF_Brachyury, p53-like_TF_DNA-bd	tbx3a
ENSDARG00000002330	IPR001356, IPR009057	Homeobox_dom, Homeodomain-like	lhx8a
ENSDARG00000002365	IPR001356, IPR009057	Homeobox_dom, Homeodomain-like	cers5
ENSDARG00000002445	IPR001214, IPR007087, IPR015880	SET_dom, Znf_C2H2, Znf_C2H2-like	prdm1a
ENSDARG00000002479	IPR000330	SNF2_N	ercc6l
ENSDARG00000002487	IPR005612	CCAAT-binding_factor	noc3l
ENSDARG00000002510	IPR001356, IPR003654, IPR009057	Homeobox_dom, OAR_dom, Homeodomain-like	dmbx1b
ENSDARG00000002582	IPR001699, IPR008967	TF_T-box, p53-like_TF_DNA-bd	tbx15
ENSDARG00000002601	IPR001356, IPR003893, IPR008422, IPR009057	Homeobox_dom, Iroquois_homeo, Homeobox_KN_domain, Homeodomain-like	irx7
ENSDARG00000002707	IPR011598	bHLH_dom	her11
ENSDARG00000002750	IPR001965, IPR007087	Znf_PHD, Znf_C2H2	phf20a
ENSDARG00000002779	IPR001356, IPR009057	Homeobox_dom, Homeodomain-like	pdx1
ENSDARG00000002787	IPR009146	Groucho_enhance	tle3a
ENSDARG00000002795	IPR001356, IPR008422, IPR009057	Homeobox_dom, Homeobox_KN_domain, Homeodomain-like	meis3
ENSDARG00000002933	IPR001356, IPR009057	Homeobox_dom, Homeodomain-like	gbx2
ENSDARG00000002937	IPR001356, IPR008422, IPR009057	Homeobox_dom, Homeobox_KN_domain, Homeodomain-like	meis1a
ENSDARG00000003021	IPR000286, IPR003084	His_deacetylse, His_deacetylse_1	hdac8
ENSDARG00000003069	IPR013069	BTB_POZ	btbd7
ENSDARG00000003098	IPR001606, IPR001965, IPR004198, IPR013637	ARID_dom, Znf_PHD, Znf_C5HC2, Lys_sp_deMease_like_dom	kdm5bb
ENSDARG00000003142	IPR009061	DNA-bd_dom_put	dachc
ENSDARG00000003165	IPR000536, IPR001628, IPR001723, IPR003068, IPR008946	Nucl_hrmn_rcpt_lig-bd_core, Znf_hrmn_rcpt, Str_hrmn_rcpt, COUP_TF, Nucl_hormone_rcpt_ligand-bd	nr2f6b
ENSDARG00000003200	IPR001766	TF_fork_head	foxm1
ENSDARG00000003207	IPR003690	MTERF	mterf3
ENSDARG00000003251	IPR007087, IPR013069, IPR015880	Znf_C2H2, BTB_POZ, Znf_C2H2-like	zbtb22b
ENSDARG00000003293	IPR009071	HMG_box_dom	sox9a
ENSDARG00000003398	IPR002909, IPR008967, IPR015350, IPR015351	IPT, p53-like_TF_DNA-bd, Beta-trefoil_DNA-bd_dom, LAG1_DNA-bd	rbpja
ENSDARG00000003411	IPR001766, IPR013638	TF_fork_head, Fork-head_N	foxa2
ENSDARG00000003469	IPR011598, IPR016637	bHLH_dom, TF_bHLH_NeuroD	neurod4
ENSDARG00000003531	IPR001222, IPR006289, IPR016492	Znf_TFIIS, TFSII, TF_IIS-rel	tcea1
ENSDARG00000003576	IPR013069	BTB_POZ	klhl32
ENSDARG00000003607	IPR000536, IPR001628, IPR001723, IPR003068, IPR008946	Nucl_hrmn_rcpt_lig-bd_core, Znf_hrmn_rcpt, Str_hrmn_rcpt, COUP_TF, Nucl_hormone_rcpt_ligand-bd	nr2f6a
ENSDARG00000003631	IPR001067, IPR011598	Nuc_translocat, bHLH_dom	clockb
ENSDARG00000003680	IPR003894, IPR013289	TAFH_NHR1, ETO	runx1t1
ENSDARG00000003732	IPR011598	bHLH_dom	mitfa
ENSDARG00000003769	IPR001005, IPR009057, IPR016827	SANT/Myb, Homeodomain-like, Ada2/TADA2	tada2b
ENSDARG00000003803	IPR001356, IPR009057	Homeobox_dom, Homeodomain-like	LHX3
ENSDARG00000003811	IPR002909	IPT	plxnb2a
ENSDARG00000003820	IPR000536, IPR001628, IPR001723, IPR001728, IPR008946	Nucl_hrmn_rcpt_lig-bd_core, Znf_hrmn_rcpt, Str_hrmn_rcpt, ThyrH_rcpt, Nucl_hormone_rcpt_ligand-bd	nr1d2a
ENSDARG00000003860	IPR000953, IPR008251, IPR016197	Chromo/shadow_dom, Chromo_shadow_dom, Chromodomain-like	cbx3a
ENSDARG00000003877	IPR001025, IPR009071	BAH_dom, HMG_box_dom	pbrm1
ENSDARG00000003899	IPR001594	Znf_DHHC_palmitoyltrfase	zdhhc23b
ENSDARG00000003965	IPR001356, IPR009057	Homeobox_dom, Homeodomain-like	tlx1
ENSDARG00000003971	IPR001356, IPR009057	Homeobox_dom, Homeodomain-like	isl2a
ENSDARG00000003974	IPR013069	BTB_POZ	spoplb
ENSDARG00000004023	IPR001356, IPR009057	Homeobox_dom, Homeodomain-like	isl1
ENSDARG00000004046	IPR001965	Znf_PHD	phf6
ENSDARG00000004060	IPR003650, IPR011598	Orange, bHLH_dom	bhlhe40
ENSDARG00000004074	IPR004826, IPR004827, IPR008917, IPR013069	bZIP_Maf, bZIP, TF_DNA-bd, BTB_POZ	bach2b
ENSDARG00000004111	IPR000536, IPR001292, IPR001628, IPR001723, IPR008946	Nucl_hrmn_rcpt_lig-bd_core, Oestr_rcpt, Znf_hrmn_rcpt, Str_hrmn_rcpt, Nucl_hormone_rcpt_ligand-bd	esr1
ENSDARG00000004174	IPR007196	CCR4-Not_Not1_C	cnot1
ENSDARG00000004189	IPR000953, IPR008251, IPR016197	Chromo/shadow_dom, Chromo_shadow_dom, Chromodomain-like	cbx1a
ENSDARG00000004306	IPR013069	BTB_POZ	klhl18
ENSDARG00000004328	IPR002059, IPR011129	CSP_DNA-bd, Cold_shock_prot	LIN28A (1 of 2)
ENSDARG00000004415	IPR009071, IPR013558	HMG_box_dom, CTNNB1-bd_N	tcf7l2
ENSDARG00000004473	IPR001699, IPR008967	TF_T-box, p53-like_TF_DNA-bd	tbx21
ENSDARG00000004502	IPR000949, IPR001005, IPR009057	ELM2_dom, SANT/Myb, Homeodomain-like	rcor3
ENSDARG00000004537	IPR001214, IPR001965, IPR002857, IPR003616, IPR003888, IPR003889	SET_dom, Znf_PHD, Znf_CXXC, Post-SET_dom, FYrich_N, FYrich_C	kmt2a
ENSDARG00000004587	IPR000953, IPR016197	Chromo/shadow_dom, Chromodomain-like	kat5a
ENSDARG00000004588	IPR009071	HMG_box_dom	sox4a
ENSDARG00000004594	IPR007087, IPR015880	Znf_C2H2, Znf_C2H2-like	znf800a
ENSDARG00000004695	IPR001356, IPR009057	Homeobox_dom, Homeodomain-like	six4a
ENSDARG00000004697	IPR000003, IPR000536, IPR001628, IPR001723, IPR008946	Retinoid-X_rcpt/HNF4, Nucl_hrmn_rcpt_lig-bd_core, Znf_hrmn_rcpt, Str_hrmn_rcpt, Nucl_hormone_rcpt_ligand-bd	rxrgb
ENSDARG00000004712	IPR001699, IPR008967	TF_T-box, p53-like_TF_DNA-bd	tbr1b
ENSDARG00000004714	IPR011598	bHLH_dom	tcf12
ENSDARG00000004724	IPR001222, IPR006289, IPR016492	Znf_TFIIS, TFSII, TF_IIS-rel	tcea3
ENSDARG00000004757	IPR002059, IPR011129	CSP_DNA-bd, Cold_shock_prot	ybx1
ENSDARG00000004843	IPR001766	TF_fork_head	foxp1a
ENSDARG00000004851	IPR007087, IPR015880	Znf_C2H2, Znf_C2H2-like	hinfp
ENSDARG00000004861	IPR000536, IPR001628, IPR001723, IPR008946	Nucl_hrmn_rcpt_lig-bd_core, Znf_hrmn_rcpt, Str_hrmn_rcpt, Nucl_hormone_rcpt_ligand-bd	esrrga
ENSDARG00000004864	IPR001766	TF_fork_head	FOXR1
ENSDARG00000004871	IPR002909	IPT	mst1rb
ENSDARG00000005002	IPR000812, IPR013137	TFIIB, Znf_TFIIB	brf1b
ENSDARG00000005010	IPR007087, IPR015880	Znf_C2H2, Znf_C2H2-like
ENSDARG00000005026	IPR001356, IPR007087, IPR015880	Homeobox_dom, Znf_C2H2, Znf_C2H2-like	tshz1
ENSDARG00000005150	IPR001699, IPR008967	TF_T-box, p53-like_TF_DNA-bd	tbx20
ENSDARG00000005186	IPR007087, IPR015880	Znf_C2H2, Znf_C2H2-like	sp4
ENSDARG00000005218	IPR006642	Znf_Rad18_put	wrnip1
ENSDARG00000005221	IPR006821	Intermed_filament_DNA-bd	desmb
ENSDARG00000005236	IPR000330	SNF2_N	srcap
ENSDARG00000005271	IPR000571	Znf_CCCH	zc3h12a
ENSDARG00000005382	IPR001214, IPR007087, IPR015880	SET_dom, Znf_C2H2, Znf_C2H2-like	prdm9
ENSDARG00000005394	IPR001525	C5_MeTfrase	dnmt3aa
ENSDARG00000005453	IPR001766	TF_fork_head	foxp2
ENSDARG00000005544	IPR013069	BTB_POZ	btbd3a
ENSDARG00000005549	IPR007087, IPR015880	Znf_C2H2, Znf_C2H2-like	ZNF710 (1 of 2)
ENSDARG00000005559	IPR000327, IPR001356, IPR009057, IPR010982, IPR013847	POU_specific, Homeobox_dom, Homeodomain-like, Lambda_DNA-bd_dom, POU	pou4f1
ENSDARG00000005574	IPR001356, IPR003654, IPR009057	Homeobox_dom, OAR_dom, Homeodomain-like	vsx2
ENSDARG00000005576	IPR000953, IPR016197	Chromo/shadow_dom, Chromodomain-like	mphosph8
ENSDARG00000005586	IPR007087, IPR013069, IPR015880	Znf_C2H2, BTB_POZ, Znf_C2H2-like	zbtb20
ENSDARG00000005590	IPR001965	Znf_PHD	mtf2
ENSDARG00000005629	IPR001214	SET_dom	smyd2b
ENSDARG00000005814	IPR013069	BTB_POZ	klhl10a
ENSDARG00000005834	IPR000679	Znf_GATA	gatad2b
ENSDARG00000005846	IPR007087, IPR015880	Znf_C2H2, Znf_C2H2-like	FO704755.1
ENSDARG00000005867	IPR009057	Homeodomain-like	gon4l
ENSDARG00000005883	IPR003150, IPR007668	DNA-bd_RFX, RFX1_trans_act	rfx1a
ENSDARG00000005915	IPR011598	bHLH_dom	tcf3a
ENSDARG00000005945	IPR005011	SART_1	sart1
ENSDARG00000006003	IPR002418, IPR011598, IPR012682	Tscrpt_reg_Myc, bHLH_dom, Tscrpt_reg_Myc_N	mycla
ENSDARG00000006011	IPR013069	BTB_POZ	klhl42
ENSDARG00000006038	IPR007087, IPR015880	Znf_C2H2, Znf_C2H2-like	aebp2
ENSDARG00000006065	IPR007087, IPR015880	Znf_C2H2, Znf_C2H2-like	znf385b
ENSDARG00000006120	IPR001699, IPR002070, IPR008967	TF_T-box, TF_Brachyury, p53-like_TF_DNA-bd	tbx2b
ENSDARG00000006124	IPR001606, IPR001965, IPR004198, IPR013637	ARID_dom, Znf_PHD, Znf_C5HC2, Lys_sp_deMease_like_dom	kdm5c
ENSDARG00000006128	IPR008984	SMAD_FHA_domain	cep170aa
ENSDARG00000006181	IPR011598	bHLH_dom	hif1aa
ENSDARG00000006192	IPR000679, IPR006612	Znf_GATA, Znf_C2CH	gatad2ab
ENSDARG00000006206	IPR000327, IPR001356, IPR009057, IPR010982, IPR013847	POU_specific, Homeobox_dom, Homeodomain-like, Lambda_DNA-bd_dom, POU	pou4f3
ENSDARG00000006235	IPR013907	Sds3	brms1la
ENSDARG00000006253	IPR000949, IPR001005, IPR009057	ELM2_dom, SANT/Myb, Homeodomain-like	mier3a
ENSDARG00000006266	IPR008967, IPR013801, IPR015988	p53-like_TF_DNA-bd, STAT_TF_DNA-bd, STAT_TF_coiled-coil	stat1a
ENSDARG00000006288	IPR001214, IPR007087, IPR015880, IPR017125	SET_dom, Znf_C2H2, Znf_C2H2-like, Znf_PRDM5	prdm5
ENSDARG00000006350	IPR001356, IPR009057	Homeobox_dom, Homeodomain-like	nkx1.2la
ENSDARG00000006389	IPR001132, IPR003619, IPR008984, IPR013019	SMAD_dom_Dwarfin-type, MAD_homology1_Dwarfin-type, SMAD_FHA_domain, MAD_homology_MH1	smad2
ENSDARG00000006408	IPR009071	HMG_box_dom	hmgb3b
ENSDARG00000006434	IPR009668	RNA_pol-assoc_fac_A49-like	polr1e
ENSDARG00000006514	IPR003650, IPR011598	Orange, bHLH_dom	her6
ENSDARG00000006524	IPR017072	TF_Spt6	supt6h
ENSDARG00000006560	IPR001346, IPR008984	Interferon_reg_fact_DNA-bd_dom, SMAD_FHA_domain	irf4a
ENSDARG00000006584	IPR001965	Znf_PHD	phf8
ENSDARG00000006615	IPR001356, IPR009057, IPR010982	Homeobox_dom, Homeodomain-like, Lambda_DNA-bd_dom	hnf1ba
ENSDARG00000006640	IPR001699, IPR008967	TF_T-box, p53-like_TF_DNA-bd	eomesa
ENSDARG00000006754	IPR005033	YEATS	mllt3
ENSDARG00000006757	IPR013069	BTB_POZ	klhl41b
ENSDARG00000006791	IPR001067, IPR011598	Nuc_translocat, bHLH_dom	arntl1a
ENSDARG00000006837	IPR002418, IPR011598, IPR012682	Tscrpt_reg_Myc, bHLH_dom, Tscrpt_reg_Myc_N	mycn
ENSDARG00000006896	IPR001356, IPR009057	Homeobox_dom, Homeodomain-like	lhx6
ENSDARG00000006939	IPR001699, IPR008967	TF_T-box, p53-like_TF_DNA-bd	tbx6l
ENSDARG00000007009	IPR001356, IPR009057	Homeobox_dom, Homeodomain-like	hoxa11b
ENSDARG00000007045	IPR000571	Znf_CCCH	cnot4a
ENSDARG00000007081	IPR004181	Znf_MIZ	pias4a
ENSDARG00000007097	IPR003650, IPR011598	Orange, bHLH_dom	her13
ENSDARG00000007135	IPR007207, IPR007282, IPR012270	Not_N, NOT, CCR4-NOT_su3/5	cnot3a
ENSDARG00000007172	IPR002909	IPT	plxna3
ENSDARG00000007184	IPR007087, IPR013069, IPR015880	Znf_C2H2, BTB_POZ, Znf_C2H2-like	zbtb16a
ENSDARG00000007186	IPR008984	SMAD_FHA_domain	ppp1r8a
ENSDARG00000007198	IPR000679, IPR000949, IPR001005, IPR001025, IPR009057	Znf_GATA, ELM2_dom, SANT/Myb, BAH_dom, Homeodomain-like	mta1
ENSDARG00000007204	IPR007087	Znf_C2H2	si:ch211-195b21.5
ENSDARG00000007241	IPR002418, IPR003327, IPR011598, IPR012682	Tscrpt_reg_Myc, Myc-LZ, bHLH_dom, Tscrpt_reg_Myc_N	mycb
ENSDARG00000007271	IPR000637, IPR007087, IPR013069, IPR015880	HMGI/Y_DNA-bd_CS, Znf_C2H2, BTB_POZ, Znf_C2H2-like	mynn
ENSDARG00000007277	IPR002546, IPR011598	Basic, bHLH_dom	myf5
ENSDARG00000007329	IPR001699, IPR008967	TF_T-box, p53-like_TF_DNA-bd	tbx16
ENSDARG00000007349	IPR001275	DM_DNA-bd	dmrt1
ENSDARG00000007369	IPR009071, IPR013558	HMG_box_dom, CTNNB1-bd_N	tcf7l1b
ENSDARG00000007387	IPR001346	Interferon_reg_fact_DNA-bd_dom	irf2a
ENSDARG00000007406	IPR001356, IPR009057	Homeobox_dom, Homeodomain-like	phox2a
ENSDARG00000007407	IPR000047, IPR001356, IPR009057	HTH_motif, Homeobox_dom, Homeodomain-like	barx1
ENSDARG00000007413	IPR001606, IPR003150, IPR007087, IPR015880	ARID_dom, DNA-bd_RFX, Znf_C2H2, Znf_C2H2-like	arid2
ENSDARG00000007430	IPR001214, IPR007087, IPR015880, IPR017126	SET_dom, Znf_C2H2, Znf_C2H2-like, Znf_PRDM12	prdm12b
ENSDARG00000007485	IPR009607	Enhancer_polycomb_C	epc2
ENSDARG00000007523	IPR001214, IPR001965	SET_dom, Znf_PHD	kmt2e
ENSDARG00000007601	IPR001965	Znf_PHD	zmynd8
ENSDARG00000007630	IPR000571	Znf_CCCH	mkrn2
ENSDARG00000007639	IPR000571	Znf_CCCH	cnot4b
ENSDARG00000007641	IPR000047, IPR001356, IPR009057	HTH_motif, Homeobox_dom, Homeodomain-like	msxe
ENSDARG00000007720	IPR003173, IPR009044	PC4, ssDNA-bd_transcriptional_reg	sub1b
ENSDARG00000007808	IPR001594	Znf_DHHC_palmitoyltrfase	zdhhc16a
ENSDARG00000007812	IPR006612, IPR007087, IPR015880	Znf_C2CH, Znf_C2H2, Znf_C2H2-like	sp3b
ENSDARG00000007823	IPR000837, IPR004827	AP-1, bZIP	atf3
ENSDARG00000007824	IPR002909, IPR005559	IPT, CG-1_dom	camta1b
ENSDARG00000007891	IPR001356, IPR009057	Homeobox_dom, Homeodomain-like	meox1
ENSDARG00000007941	IPR001356, IPR009057	Homeobox_dom, Homeodomain-like	hmx4
ENSDARG00000007944	IPR001356, IPR009057	Homeobox_dom, Homeodomain-like	lhx1b
ENSDARG00000007982	IPR001356, IPR003350, IPR009057, IPR010982	Homeobox_dom, CUT_dom, Homeodomain-like, Lambda_DNA-bd_dom	onecut1
ENSDARG00000007990	IPR000976, IPR007087, IPR015880	Wilms_tumour_N, Znf_C2H2, Znf_C2H2-like	wt1b
ENSDARG00000007996	IPR000327, IPR000972, IPR001356, IPR009057, IPR010982, IPR013847	POU_specific, TF_octamer, Homeobox_dom, Homeodomain-like, Lambda_DNA-bd_dom, POU	pou2f1b
ENSDARG00000008010	IPR001766	TF_fork_head	zgc:194189
ENSDARG00000008020	IPR008831	Mediator_Med31	med31
ENSDARG00000008034	IPR009061, IPR010919	DNA-bd_dom_put, SAND_dom-like	skib
ENSDARG00000008119	IPR003316, IPR006612	E2F_WHTH_DNA-bd_dom, Znf_C2CH	E2F6
ENSDARG00000008131	IPR009071	HMG_box_dom	sox1b
ENSDARG00000008133	IPR001766	TF_fork_head	foxl1
ENSDARG00000008174	IPR001356, IPR009057	Homeobox_dom, Homeodomain-like	hoxb1a
ENSDARG00000008203	IPR001523, IPR009057	Paired_dom, Homeodomain-like	pax1a
ENSDARG00000008209	IPR002515, IPR013681	Znf_C2HC, Myelin_TF	myt1la
ENSDARG00000008218	IPR007087, IPR015880	Znf_C2H2, Znf_C2H2-like	znf410
ENSDARG00000008247	IPR007087, IPR015880	Znf_C2H2, Znf_C2H2-like	vezf1a
ENSDARG00000008275	IPR013069	BTB_POZ	klhl24b
ENSDARG00000008278	IPR000949, IPR001005, IPR009057	ELM2_dom, SANT/Myb, Homeodomain-like	rcor2
ENSDARG00000008305	IPR011598	bHLH_dom	hand2
ENSDARG00000008333	IPR007087, IPR015880	Znf_C2H2, Znf_C2H2-like	znfl2a
ENSDARG00000008384	IPR000286	His_deacetylse	hdac6
ENSDARG00000008472	IPR010666	Znf_GRF	apex2
ENSDARG00000008540	IPR009071	HMG_box_dom	sox21b
ENSDARG00000008551	IPR003958	CBFA_NFYB_domain	pole3
ENSDARG00000008697	IPR001067, IPR011598	Nuc_translocat, bHLH_dom	epas1a
ENSDARG00000008767	IPR009146	Groucho_enhance	si:dkey-42p8.3
ENSDARG00000008796	IPR003650, IPR011598	Orange, bHLH_dom	her5
ENSDARG00000008818	IPR000232, IPR010542	HSF_DNA-bd, Vert_HSTF_C	hsf1
ENSDARG00000008852	IPR008728	Elongator_complex_protein_4	elp4
ENSDARG00000008861	IPR013854	TF_AP2_C	tfap2e
ENSDARG00000008886	IPR001356, IPR009057	Homeobox_dom, Homeodomain-like	msxb
ENSDARG00000008904	IPR000330	SNF2_N	smarca2
ENSDARG00000008906	IPR007087, IPR015880	Znf_C2H2, Znf_C2H2-like	si:ch211-241e1.5
ENSDARG00000008947	IPR004343	Plus-3	rtf1
ENSDARG00000008986	IPR003316	E2F_WHTH_DNA-bd_dom	e2f7
ENSDARG00000009094	IPR000679, IPR016374	Znf_GATA, TF_GATA-2/3	gata2b
ENSDARG00000009134	IPR000047, IPR001356, IPR009057	HTH_motif, Homeobox_dom, Homeodomain-like	hlx1
ENSDARG00000009242	IPR000418	Ets_dom	fev
ENSDARG00000009280	IPR001214	SET_dom	smyd1a
ENSDARG00000009418	IPR002100	TF_MADSbox	mef2cb
ENSDARG00000009438	IPR002546, IPR011598	Basic, bHLH_dom	myog
ENSDARG00000009470	IPR001356, IPR009057, IPR010982	Homeobox_dom, Homeodomain-like, Lambda_DNA-bd_dom	hnf1a
ENSDARG00000009473	IPR000536, IPR001628, IPR001723, IPR003074, IPR008946	Nucl_hrmn_rcpt_lig-bd_core, Znf_hrmn_rcpt, Str_hrmn_rcpt, 1Cnucl_rcpt, Nucl_hormone_rcpt_ligand-bd	ppardb
ENSDARG00000009550	IPR001766	TF_fork_head	foxi3b
ENSDARG00000009594	IPR000536, IPR001628, IPR001723, IPR008946	Nucl_hrmn_rcpt_lig-bd_core, Znf_hrmn_rcpt, Str_hrmn_rcpt, Nucl_hormone_rcpt_ligand-bd	nr1d2b
ENSDARG00000009754	IPR000571	Znf_CCCH	zc3h11a
ENSDARG00000009822	IPR003650, IPR011598	Orange, bHLH_dom	her4.4
ENSDARG00000009823	IPR000327, IPR001356, IPR009057, IPR010982, IPR013847, IPR016362	POU_specific, Homeobox_dom, Homeodomain-like, Lambda_DNA-bd_dom, POU, TF_POU_3	pou3f1
ENSDARG00000009899	IPR007087, IPR015880	Znf_C2H2, Znf_C2H2-like	znf385a
ENSDARG00000009922	IPR001356, IPR003654, IPR009057	Homeobox_dom, OAR_dom, Homeodomain-like	dmbx1a
ENSDARG00000009950	IPR001387, IPR010982	Cro/C1-type_HTH, Lambda_DNA-bd_dom	edf1
ENSDARG00000009953	IPR013947	Mediator_Med14	med14
ENSDARG00000010008	IPR006821	Intermed_filament_DNA-bd	vim
ENSDARG00000010031	IPR014876	DEK_C	ssh1b
ENSDARG00000010124	IPR007087, IPR015880	Znf_C2H2, Znf_C2H2-like	sp5l
ENSDARG00000010132	IPR009061	DNA-bd_dom_put	dacha
ENSDARG00000010192	IPR001356, IPR001523, IPR009057	Homeobox_dom, Paired_dom, Homeodomain-like	pax3a
ENSDARG00000010207	IPR001132, IPR003619, IPR008984, IPR013019	SMAD_dom_Dwarfin-type, MAD_homology1_Dwarfin-type, SMAD_FHA_domain, MAD_homology_MH1	smad3b
ENSDARG00000010238	IPR000571	Znf_CCCH	rbm22
ENSDARG00000010270	IPR007087, IPR015880	Znf_C2H2, Znf_C2H2-like	fezf1
ENSDARG00000010415	IPR003000	Sirtuin	sirt4
ENSDARG00000010563	IPR013069	BTB_POZ	spopla
ENSDARG00000010571	IPR001005, IPR001214	SANT/Myb, SET_dom	ezh2
ENSDARG00000010591	IPR001766	TF_fork_head	foxn4
ENSDARG00000010630	IPR001356, IPR001827, IPR009057	Homeobox_dom, Homeobox_Antennapedia_CS, Homeodomain-like	hoxb6a
ENSDARG00000010770	IPR009071	HMG_box_dom	sox19a
ENSDARG00000010794	IPR011598	bHLH_dom	tfeb
ENSDARG00000010831	IPR009508	Transcrpt_activator_Churchill	churc1
ENSDARG00000010978	IPR000571	Znf_CCCH	trmt1
ENSDARG00000010981	IPR001594	Znf_DHHC_palmitoyltrfase	zdhhc3a
ENSDARG00000011000	IPR004855	TFIIA_asu/bsu	gtf2a1
ENSDARG00000011235	IPR001356, IPR003022, IPR003025, IPR009057, IPR013851	Homeobox_dom, Otx2_TF, Otx_TF, Homeodomain-like, Otx_TF_C	otx2
ENSDARG00000011273	IPR001356, IPR009057	Homeobox_dom, Homeodomain-like	tlx2
ENSDARG00000011298	IPR004827, IPR007087, IPR016378	bZIP, Znf_C2H2, TF_CRE-BP1-typ	atf7a
ENSDARG00000011445	IPR000949, IPR001005, IPR007087, IPR009057	ELM2_dom, SANT/Myb, Znf_C2H2, Homeodomain-like	elmsan1a
ENSDARG00000011488	IPR003000	Sirtuin	sirt2
ENSDARG00000011510	IPR000408	Reg_chr_condens	rcc2
ENSDARG00000011570	IPR000327, IPR001356, IPR009057, IPR010982, IPR013847	POU_specific, Homeobox_dom, Homeodomain-like, Lambda_DNA-bd_dom, POU	pou6f1
ENSDARG00000011579	IPR001356, IPR009057	Homeobox_dom, Homeodomain-like	hoxb10a
ENSDARG00000011582	IPR009071	HMG_box_dom	sox5
ENSDARG00000011594	IPR006939, IPR017393	SNF5, SWI_SNF_chromatin_remodel_cplx	smarcb1b
ENSDARG00000011609	IPR001766, IPR008984	TF_fork_head, SMAD_FHA_domain	FOXK2 (1 of 2)
ENSDARG00000011635	IPR011598	bHLH_dom	scxb
ENSDARG00000011696	IPR000536, IPR001628, IPR001723, IPR008946	Nucl_hrmn_rcpt_lig-bd_core, Znf_hrmn_rcpt, Str_hrmn_rcpt, Nucl_hormone_rcpt_ligand-bd	esrrgb
ENSDARG00000011703	IPR001067, IPR011598	Nuc_translocat, bHLH_dom	clocka
ENSDARG00000011785	IPR001699, IPR008967	TF_T-box, p53-like_TF_DNA-bd	tbx6
ENSDARG00000011818	IPR000837, IPR004827	AP-1, bZIP	batf
ENSDARG00000011862	IPR006821	Intermed_filament_DNA-bd	inaa
ENSDARG00000011870	IPR007087, IPR015880	Znf_C2H2, Znf_C2H2-like	sp8a
ENSDARG00000011879	IPR001766	TF_fork_head	foxn1
ENSDARG00000011932	IPR001965	Znf_PHD	prkcbp1l
ENSDARG00000011956	IPR000047, IPR001356, IPR009057	HTH_motif, Homeobox_dom, Homeodomain-like	dlx4a
ENSDARG00000011989	IPR001356, IPR003025, IPR009057, IPR013851	Homeobox_dom, Otx_TF, Homeodomain-like, Otx_TF_C	crx
ENSDARG00000012078	IPR001356, IPR008422, IPR009057	Homeobox_dom, Homeobox_KN_domain, Homeodomain-like	meis1b
ENSDARG00000012219	IPR001965, IPR007087, IPR015880	Znf_PHD, Znf_C2H2, Znf_C2H2-like	dpf2
ENSDARG00000012281	IPR006821	Intermed_filament_DNA-bd	zgc:65851
ENSDARG00000012403	IPR000330	SNF2_N	ercc6l2
ENSDARG00000012435	IPR000418	Ets_dom	spic
ENSDARG00000012572	IPR007832	RNA_pol_Rpc34	polr3f
ENSDARG00000012642	IPR007087, IPR015880	Znf_C2H2, Znf_C2H2-like
ENSDARG00000012649	IPR001132, IPR003619, IPR008984, IPR013019	SMAD_dom_Dwarfin-type, MAD_homology1_Dwarfin-type, SMAD_FHA_domain, MAD_homology_MH1	SMAD4 (1 of 2)
ENSDARG00000012656	IPR004827	bZIP	atf6
ENSDARG00000012667	IPR008122, IPR013854	TF_AP2_beta, TF_AP2_C	tfap2b
ENSDARG00000012699	IPR009071	HMG_box_dom	bbx
ENSDARG00000012776	IPR000330, IPR001005, IPR009057, IPR015194, IPR015195	SNF2_N, SANT/Myb, Homeodomain-like, ISWI_HAND-dom, SLIDE	smarca1
ENSDARG00000012788	IPR001766, IPR013638	TF_fork_head, Fork-head_N	foxa3
ENSDARG00000012833	IPR001766	TF_fork_head	foxn3
ENSDARG00000012887	IPR007087, IPR015880	Znf_C2H2, Znf_C2H2-like	znf143a
ENSDARG00000012927	IPR001222, IPR006289, IPR016492	Znf_TFIIS, TFSII, TF_IIS-rel	tcea2
ENSDARG00000012949	IPR004092	Mbt	scml2
ENSDARG00000013016	IPR003958	CBFA_NFYB_domain	pole4
ENSDARG00000013031	IPR000679, IPR000949, IPR001005, IPR001025, IPR009057	Znf_GATA, ELM2_dom, SANT/Myb, BAH_dom, Homeodomain-like	mta2
ENSDARG00000013057	IPR001356, IPR001827, IPR009057	Homeobox_dom, Homeobox_Antennapedia_CS, Homeodomain-like	hoxb5a
ENSDARG00000013122	IPR015257	Maf1	maf1
ENSDARG00000013125	IPR000047, IPR001356, IPR009057	HTH_motif, Homeobox_dom, Homeodomain-like	dlx1a
ENSDARG00000013207	IPR001356, IPR007087, IPR009057, IPR015880	Homeobox_dom, Znf_C2H2, Homeodomain-like, Znf_C2H2-like	zeb1b
ENSDARG00000013251	IPR000232	HSF_DNA-bd	hsf4
ENSDARG00000013279	IPR007087, IPR015880	Znf_C2H2, Znf_C2H2-like	znf76
ENSDARG00000013434	IPR011494	Hira	hira
ENSDARG00000013441	IPR003650, IPR011598	Orange, bHLH_dom	hey2
ENSDARG00000013477	IPR000679, IPR016374	Znf_GATA, TF_GATA-2/3	gata1a
ENSDARG00000013492	IPR007087, IPR013069, IPR015880	Znf_C2H2, BTB_POZ, Znf_C2H2-like	zbtb34
ENSDARG00000013533	IPR001356, IPR001827, IPR009057	Homeobox_dom, Homeobox_Antennapedia_CS, Homeodomain-like	hoxb4a
ENSDARG00000013539	IPR007087, IPR015880	Znf_C2H2, Znf_C2H2-like	ikzf1
ENSDARG00000013575	IPR003150, IPR007668	DNA-bd_RFX, RFX1_trans_act	rfx2
ENSDARG00000013596	IPR001965	Znf_PHD	brd1a
ENSDARG00000013615	IPR001356, IPR005542, IPR009057	Homeobox_dom, PBX, Homeodomain-like	pbx3b
ENSDARG00000013704	IPR001356, IPR009057	Homeobox_dom, Homeodomain-like	cers2a
ENSDARG00000013789	IPR001067, IPR010578, IPR011598	Nuc_translocat, SIM_C, bHLH_dom	sim1b
ENSDARG00000013794	IPR007087, IPR015880	Znf_C2H2, Znf_C2H2-like	klf11b
ENSDARG00000013907	IPR013069	BTB_POZ	KBTBD13 (1 of 3)
ENSDARG00000013946	IPR013069	BTB_POZ	ivns1abpb
ENSDARG00000014018	IPR001356, IPR009057	Homeobox_dom, Homeodomain-like	lhx1a
ENSDARG00000014041	IPR000330	SNF2_N	smarcad1a
ENSDARG00000014091	IPR007087, IPR015880	Znf_C2H2, Znf_C2H2-like	osr1
ENSDARG00000014181	IPR001766	TF_fork_head	foxp1b
ENSDARG00000014201	IPR000047, IPR001356, IPR003654, IPR009057	HTH_motif, Homeobox_dom, OAR_dom, Homeodomain-like	otpa
ENSDARG00000014218	IPR001739, IPR016177, IPR017353	Methyl_CpG_DNA-bd, DNA-bd_dom, Me_CpG-bd_MeCP2	mecp2
ENSDARG00000014321	IPR000047, IPR000747, IPR001356, IPR009057	HTH_motif, Homeodomain_engrailed, Homeobox_dom, Homeodomain-like	eng1a
ENSDARG00000014463	IPR011598	bHLH_dom	usf1l
ENSDARG00000014479	IPR011598	bHLH_dom	ptf1a
ENSDARG00000014480	IPR000536, IPR001628, IPR001723, IPR008946	Nucl_hrmn_rcpt_lig-bd_core, Znf_hrmn_rcpt, Str_hrmn_rcpt, Nucl_hormone_rcpt_ligand-bd	nr6a1b
ENSDARG00000014550	IPR003150, IPR007668	DNA-bd_RFX, RFX1_trans_act	rfx3
ENSDARG00000014626	IPR000047, IPR001356, IPR009057	HTH_motif, Homeobox_dom, Homeodomain-like	dlx3b
ENSDARG00000014680	IPR007087, IPR015880	Znf_C2H2, Znf_C2H2-like	znf710a
ENSDARG00000014692	IPR007087, IPR015880	Znf_C2H2, Znf_C2H2-like	znf622
ENSDARG00000014722	IPR003650, IPR011598	Orange, bHLH_dom	her1
ENSDARG00000014775	IPR007087, IPR015880	Znf_C2H2, Znf_C2H2-like	ZFP28 (1 of 19)
ENSDARG00000014825	IPR007087, IPR015880	Znf_C2H2, Znf_C2H2-like	ZNF865 (1 of 2)
ENSDARG00000014828	IPR002515, IPR004092	Znf_C2HC, Mbt	l3mbtl1a
ENSDARG00000014945	IPR007087, IPR015880	Znf_C2H2, Znf_C2H2-like	znf598
ENSDARG00000014994	IPR000814	TBP	tbp
ENSDARG00000015064	IPR000536, IPR001628, IPR001723, IPR008946	Nucl_hrmn_rcpt_lig-bd_core, Znf_hrmn_rcpt, Str_hrmn_rcpt, Nucl_hormone_rcpt_ligand-bd	esrrd
ENSDARG00000015072	IPR001275	DM_DNA-bd	dmrt2a
ENSDARG00000015278	IPR002909	IPT	plxnc1
ENSDARG00000015312	IPR007087, IPR015880	Znf_C2H2, Znf_C2H2-like	klf12a
ENSDARG00000015325	IPR000571	Znf_CCCH	u2af1
ENSDARG00000015355	IPR000837, IPR004827	AP-1, bZIP	fosl1a
ENSDARG00000015399	IPR001766	TF_fork_head	foxf1
ENSDARG00000015427	IPR000286, IPR003084	His_deacetylse, His_deacetylse_1	hdac1
ENSDARG00000015471	IPR000330	SNF2_N	chd1l
ENSDARG00000015482	IPR007087, IPR015880	Znf_C2H2, Znf_C2H2-like	zgc:171570
ENSDARG00000015495	IPR007087, IPR015880	Znf_C2H2, Znf_C2H2-like	klf3
ENSDARG00000015506	IPR007087, IPR015880	Znf_C2H2, Znf_C2H2-like	klf5a
ENSDARG00000015536	IPR009071	HMG_box_dom	sox6
ENSDARG00000015538	IPR007087, IPR015880	Znf_C2H2, Znf_C2H2-like	znf207a
ENSDARG00000015552	IPR004018	RPEL_repeat	phactr4a
ENSDARG00000015554	IPR007087, IPR015880	Znf_C2H2, Znf_C2H2-like	zic2a
ENSDARG00000015566	IPR001525	C5_MeTfrase	dnmt3ab
ENSDARG00000015567	IPR007087, IPR015880	Znf_C2H2, Znf_C2H2-like	zic1
ENSDARG00000015674	IPR001356, IPR009057	Homeobox_dom, Homeodomain-like	msxc
ENSDARG00000015793	IPR004827	bZIP	creb3l1
ENSDARG00000015876	IPR011598	bHLH_dom	npas3b
ENSDARG00000015879	IPR001523, IPR009057	Paired_dom, Homeodomain-like	pax8
ENSDARG00000015889	IPR000571	Znf_CCCH	zc3h15
ENSDARG00000015890	IPR004826, IPR004827, IPR008917	bZIP_Maf, bZIP, TF_DNA-bd	maf
ENSDARG00000015902	IPR008967, IPR013801, IPR015988	p53-like_TF_DNA-bd, STAT_TF_DNA-bd, STAT_TF_coiled-coil	stat6
ENSDARG00000015905	IPR013069	BTB_POZ	lztr1
ENSDARG00000015906	IPR001356, IPR009057	Homeobox_dom, Homeodomain-like	mxtx2
ENSDARG00000015989	IPR001594	Znf_DHHC_palmitoyltrfase	zdhhc16b
ENSDARG00000015998	IPR009071	HMG_box_dom	wdhd1
ENSDARG00000016022	IPR007087, IPR015880	Znf_C2H2, Znf_C2H2-like	zic5
ENSDARG00000016085	IPR000571	Znf_CCCH	mbnl3
ENSDARG00000016132	IPR013069	BTB_POZ	keap1a
ENSDARG00000016154	IPR000571	Znf_CCCH	zfp36l1a
ENSDARG00000016181	IPR001965	Znf_PHD	trim33
ENSDARG00000016263	IPR001594	Znf_DHHC_palmitoyltrfase	zdhhc5a
ENSDARG00000016304	IPR003316, IPR014889, IPR015648	E2F_WHTH_DNA-bd_dom, Transc_factor_DP_C, Transcrpt_fac_DP	tfdp1b
ENSDARG00000016318	IPR009244	Mediatior_Med7	med7
ENSDARG00000016363	IPR003650, IPR011598	Orange, bHLH_dom	her8a
ENSDARG00000016454	IPR000536, IPR001628, IPR001723, IPR008946	Nucl_hrmn_rcpt_lig-bd_core, Znf_hrmn_rcpt, Str_hrmn_rcpt, Nucl_hormone_rcpt_ligand-bd	esr2a
ENSDARG00000016457	IPR001346, IPR008984	Interferon_reg_fact_DNA-bd_dom, SMAD_FHA_domain	irf9
ENSDARG00000016513	IPR001214	SET_dom	setd3
ENSDARG00000016514	IPR007087, IPR007198, IPR012170	Znf_C2H2, Ssl1-like, TFIIH_SSL1/p44	gtf2h2
ENSDARG00000016526	IPR000679, IPR016374	Znf_GATA, TF_GATA-2/3	gata3
ENSDARG00000016531	IPR013069	BTB_POZ	klhl4
ENSDARG00000016536	IPR001067, IPR011598	Nuc_translocat, bHLH_dom	npas2
ENSDARG00000016651	IPR007087, IPR015880	Znf_C2H2, Znf_C2H2-like	znf106a
ENSDARG00000016763	IPR007087, IPR015880	Znf_C2H2, Znf_C2H2-like	znf292a
ENSDARG00000016788	IPR007087, IPR015880	Znf_C2H2, Znf_C2H2-like	zeb1a
ENSDARG00000016854	IPR011598, IPR016637	bHLH_dom, TF_bHLH_NeuroD	neurod2
ENSDARG00000016858	IPR001132, IPR003619, IPR008984, IPR013019	SMAD_dom_Dwarfin-type, MAD_homology1_Dwarfin-type, SMAD_FHA_domain, MAD_homology_MH1	smad7
ENSDARG00000016864	IPR009061	DNA-bd_dom_put	farsb
ENSDARG00000016868	IPR013069	BTB_POZ	rhobtb2a
ENSDARG00000016871	IPR009071	HMG_box_dom	smarce1
ENSDARG00000016951	IPR011598	bHLH_dom	neurog3
ENSDARG00000016994	IPR000969, IPR009071, IPR013719	SSrcognition, HMG_box_dom, DUF1747	ssrp1b
ENSDARG00000016999	IPR002059, IPR011129	CSP_DNA-bd, Cold_shock_prot	lin28a
ENSDARG00000017007	IPR000536, IPR001628, IPR001723, IPR003070, IPR003073, IPR008946	Nucl_hrmn_rcpt_lig-bd_core, Znf_hrmn_rcpt, Str_hrmn_rcpt, Nuc_orph_rcpt, NURR_rcpt, Nucl_hormone_rcpt_ligand-bd	nr4a2a
ENSDARG00000017078	IPR011598	bHLH_dom	mespaa
ENSDARG00000017107	IPR000536, IPR001628, IPR001723, IPR008946	Nucl_hrmn_rcpt_lig-bd_core, Znf_hrmn_rcpt, Str_hrmn_rcpt, Nucl_hormone_rcpt_ligand-bd	nr2e1
ENSDARG00000017121	IPR004826, IPR004827, IPR008917	bZIP_Maf, bZIP, TF_DNA-bd	mafba
ENSDARG00000017168	IPR000536, IPR001628, IPR001723, IPR003068, IPR008946	Nucl_hrmn_rcpt_lig-bd_core, Znf_hrmn_rcpt, Str_hrmn_rcpt, COUP_TF, Nucl_hormone_rcpt_ligand-bd	nr2f1b
ENSDARG00000017174	IPR000047, IPR001356, IPR009057	HTH_motif, Homeobox_dom, Homeodomain-like	dlx2b
ENSDARG00000017195	IPR001766	TF_fork_head	foxf2a
ENSDARG00000017211	IPR002909	IPT	plxnb1b
ENSDARG00000017244	IPR000330, IPR000953, IPR016197	SNF2_N, Chromo/shadow_dom, Chromodomain-like	chd6
ENSDARG00000017366	IPR001214, IPR007087, IPR015880, IPR017124	SET_dom, Znf_C2H2, Znf_C2H2-like, Znf_PRDM4	prdm4
ENSDARG00000017397	IPR001005, IPR009057	SANT/Myb, Homeodomain-like	smarcc1a
ENSDARG00000017400	IPR007087, IPR015880	Znf_C2H2, Znf_C2H2-like	klf1
ENSDARG00000017427	IPR001965, IPR007087, IPR014002	Znf_PHD, Znf_C2H2, Tudor-like_plant	phf20l1
ENSDARG00000017615	IPR001356, IPR009057	Homeobox_dom, Homeodomain-like	tlx3b
ENSDARG00000017780	IPR000536, IPR001628, IPR001723, IPR003079, IPR008946	Nucl_hrmn_rcpt_lig-bd_core, Znf_hrmn_rcpt, Str_hrmn_rcpt, ROR_rcpt, Nucl_hormone_rcpt_ligand-bd	rorcb
ENSDARG00000017821	IPR000679, IPR008013, IPR016375	Znf_GATA, GATA_N, TF_GATA_4/5/6	gata5
ENSDARG00000017835	IPR000812, IPR013137	TFIIB, Znf_TFIIB	brf1a
ENSDARG00000017886	IPR007087, IPR013069, IPR015880	Znf_C2H2, BTB_POZ, Znf_C2H2-like	zbtb11
ENSDARG00000017917	IPR003650, IPR011598	Orange, bHLH_dom	her7
ENSDARG00000017929	IPR009110, IPR011598, IPR014920, IPR017426	Nuc_rcpt_coact, bHLH_dom, Nuc_rcpt_coact_Ncoa-typ, Nuclear_rcpt_coactivator	ncoa2
ENSDARG00000017953	IPR002117, IPR008967, IPR011615	p53_tumour_suppressor, p53-like_TF_DNA-bd, p53_DNA-bd	tp73
ENSDARG00000018000	IPR007604	CP2	ubp1
ENSDARG00000018004	IPR001356, IPR009057	Homeobox_dom, Homeodomain-like	nkx2.5
ENSDARG00000018025	IPR001699, IPR002070, IPR008967	TF_T-box, TF_Brachyury, p53-like_TF_DNA-bd	tbx2a
ENSDARG00000018047	IPR013907	Sds3	brms1lb
ENSDARG00000018109	IPR004826, IPR004827, IPR008917	bZIP_Maf, bZIP, TF_DNA-bd	mafga
ENSDARG00000018111	IPR001965	Znf_PHD	kdm7aa
ENSDARG00000018145	IPR009786	Spot_14	mid1ip1l
ENSDARG00000018257	IPR009110, IPR011598, IPR014920	Nuc_rcpt_coact, bHLH_dom, Nuc_rcpt_coact_Ncoa-typ	ncoa1
ENSDARG00000018303	IPR000418, IPR006715	Ets_dom, ETS_PEA3_N	etv4
ENSDARG00000018321	IPR000047, IPR001356, IPR009057	HTH_motif, Homeobox_dom, Homeodomain-like	lbx1a
ENSDARG00000018325	IPR007582	TFIID-su_WD40-assoc_reg	taf5
ENSDARG00000018460	IPR000571	Znf_CCCH	mbnl2
ENSDARG00000018492	IPR007087	Znf_C2H2	znf503
ENSDARG00000018508	IPR001594	Znf_DHHC_palmitoyltrfase	zdhhc8b
ENSDARG00000018559	IPR001965	Znf_PHD	kdm7ab
ENSDARG00000018611	IPR000047, IPR001356, IPR009057	HTH_motif, Homeobox_dom, Homeodomain-like	lbx1b
ENSDARG00000018619	IPR001356, IPR009057	Homeobox_dom, Homeodomain-like	cers4b
ENSDARG00000018623	IPR000330	SNF2_N	rad54l
ENSDARG00000018688	IPR000418	Ets_dom	elk3
ENSDARG00000018691	IPR001965	Znf_PHD	phf2
ENSDARG00000018757	IPR007087, IPR015880	Znf_C2H2, Znf_C2H2-like	klf18
ENSDARG00000018765	IPR001356, IPR008422, IPR009057	Homeobox_dom, Homeobox_KN_domain, Homeodomain-like	pknox1.1
ENSDARG00000018773	IPR007087, IPR015880	Znf_C2H2, Znf_C2H2-like	HIVEP2 (1 of 2)
ENSDARG00000018782	IPR001965	Znf_PHD	kdm4aa
ENSDARG00000018907	IPR001965	Znf_PHD	kat6a
ENSDARG00000018913	IPR001356, IPR009057, IPR010982	Homeobox_dom, Homeodomain-like, Lambda_DNA-bd_dom	hmbox1b
ENSDARG00000019013	IPR001356, IPR009057	Homeobox_dom, Homeodomain-like	barhl1b
ENSDARG00000019103	IPR001965	Znf_PHD	kdm4ab
ENSDARG00000019116	IPR001965	Znf_PHD	ing1
ENSDARG00000019125	IPR013069	BTB_POZ	klhl40b
ENSDARG00000019265	IPR007087, IPR013069, IPR015880	Znf_C2H2, BTB_POZ, Znf_C2H2-like	ZBTB39
ENSDARG00000019293	IPR003316, IPR014889, IPR015648	E2F_WHTH_DNA-bd_dom, Transc_factor_DP_C, Transcrpt_fac_DP	tfdp1a
ENSDARG00000019299	IPR007087, IPR015880	Znf_C2H2, Znf_C2H2-like	znf687b
ENSDARG00000019302	IPR009786	Spot_14	mid1ip1b
ENSDARG00000019304	IPR004018	RPEL_repeat	phactr3b
ENSDARG00000019328	IPR002909	IPT	plxna4
ENSDARG00000019335	IPR003650, IPR011598	Orange, bHLH_dom	hes6
ENSDARG00000019392	IPR008967, IPR013801, IPR015988	p53-like_TF_DNA-bd, STAT_TF_DNA-bd, STAT_TF_coiled-coil	stat5a
ENSDARG00000019457	IPR011598	bHLH_dom	tfe3b
ENSDARG00000019459	IPR000418	Ets_dom	elf2a
ENSDARG00000019484	IPR001594	Znf_DHHC_palmitoyltrfase	zdhhc7
ENSDARG00000019516	IPR007087, IPR015880	Znf_C2H2, Znf_C2H2-like	sp7
ENSDARG00000019566	IPR011598, IPR016637	bHLH_dom, TF_bHLH_NeuroD	neurod1
ENSDARG00000019572	IPR006751	TAFII55_prot_cons_reg	taf7
ENSDARG00000019614	IPR001965	Znf_PHD	jade3
ENSDARG00000019646	IPR011598	bHLH_dom	twist3
ENSDARG00000019658	IPR000327, IPR000972, IPR001356, IPR009057, IPR010982, IPR013847	POU_specific, TF_octamer, Homeobox_dom, Homeodomain-like, Lambda_DNA-bd_dom, POU	pou2f2a
ENSDARG00000019717	IPR001356, IPR005542, IPR009057	Homeobox_dom, PBX, Homeodomain-like	pbx2
ENSDARG00000019774	IPR001356, IPR009057	Homeobox_dom, Homeodomain-like	zhx3
ENSDARG00000019810	IPR004826, IPR004827, IPR008917	bZIP_Maf, bZIP, TF_DNA-bd	nfe2l3
ENSDARG00000019835	IPR001356, IPR009057	Homeobox_dom, Homeodomain-like	nkx2.1
ENSDARG00000019842	IPR007207, IPR007282, IPR012270	Not_N, NOT, CCR4-NOT_su3/5	cnot3b
ENSDARG00000019930	IPR011598	bHLH_dom	tal1
ENSDARG00000019961	IPR007087, IPR015880	Znf_C2H2, Znf_C2H2-like	znf513
ENSDARG00000020046	IPR001067, IPR011598	Nuc_translocat, bHLH_dom	ahr1a
ENSDARG00000020079	IPR010666	Znf_GRF	neil3
ENSDARG00000020133	IPR000837, IPR004827	AP-1, bZIP	jdp2b
ENSDARG00000020176	IPR007087, IPR013069, IPR015880	Znf_C2H2, BTB_POZ, Znf_C2H2-like	ZBTB22 (2 of 2)
ENSDARG00000020217	IPR000571	Znf_CCCH	cpsf4
ENSDARG00000020228	IPR011598	bHLH_dom	usf2
ENSDARG00000020354	IPR001356, IPR009057	Homeobox_dom, Homeodomain-like	lmx1a
ENSDARG00000020417	IPR001356, IPR009057	Homeobox_dom, Homeodomain-like	emx3
ENSDARG00000020606	IPR004826, IPR004827, IPR008917	bZIP_Maf, bZIP, TF_DNA-bd	nfe2
ENSDARG00000020655	IPR007087, IPR015880	Znf_C2H2, Znf_C2H2-like	INSM2
ENSDARG00000020746	IPR007087, IPR015880	Znf_C2H2, Znf_C2H2-like	gfi1aa
ENSDARG00000020759	IPR000418	Ets_dom	ef1
ENSDARG00000020794	IPR011598	bHLH_dom	neurod6b
ENSDARG00000020840	IPR008984	SMAD_FHA_domain	mcrs1
ENSDARG00000020872	IPR002909, IPR008366, IPR008967, IPR011539	IPT, NFAT, p53-like_TF_DNA-bd, RHD	nfat5a
ENSDARG00000020884	IPR007087, IPR015880	Znf_C2H2, Znf_C2H2-like	gli2b
ENSDARG00000020926	IPR001630, IPR004827	Leuzip_CREB, bZIP	creb3l3l
ENSDARG00000020948	IPR013069	BTB_POZ	gmcl1
ENSDARG00000020964	IPR006612	Znf_C2CH	prkrirb
ENSDARG00000021032	IPR001766	TF_fork_head	foxd3
ENSDARG00000021055	IPR001356, IPR009057	Homeobox_dom, Homeodomain-like	isl1l
ENSDARG00000021086	IPR007087, IPR015880	Znf_C2H2, Znf_C2H2-like	znf367
ENSDARG00000021163	IPR000536, IPR001628, IPR001723, IPR001728, IPR008946	Nucl_hrmn_rcpt_lig-bd_core, Znf_hrmn_rcpt, Str_hrmn_rcpt, ThyrH_rcpt, Nucl_hormone_rcpt_ligand-bd	thrb
ENSDARG00000021201	IPR001356, IPR009057	Homeobox_dom, Homeodomain-like	noto
ENSDARG00000021232	IPR001356, IPR009057	Homeobox_dom, Homeodomain-like	nkx2.7
ENSDARG00000021288	IPR000949, IPR001005, IPR009057	ELM2_dom, SANT/Myb, Homeodomain-like	mier3b
ENSDARG00000021336	IPR001356, IPR001523, IPR009057	Homeobox_dom, Paired_dom, Homeodomain-like	pax4
ENSDARG00000021351	IPR006821	Intermed_filament_DNA-bd	nefma
ENSDARG00000021378	IPR001965	Znf_PHD	phf21ab
ENSDARG00000021405	IPR000330, IPR000953, IPR001965, IPR009071, IPR012957, IPR012958, IPR016197	SNF2_N, Chromo/shadow_dom, Znf_PHD, HMG_box_dom, CHD_C2, CHD_N, Chromodomain-like	chd3
ENSDARG00000021443	IPR000571	Znf_CCCH	zfp36l1b
ENSDARG00000021494	IPR000536, IPR001628, IPR001723, IPR003068, IPR008946	Nucl_hrmn_rcpt_lig-bd_core, Znf_hrmn_rcpt, Str_hrmn_rcpt, COUP_TF, Nucl_hormone_rcpt_ligand-bd	hnf4a
ENSDARG00000021677	IPR001965	Znf_PHD	phf11
ENSDARG00000021739	IPR013069	BTB_POZ	klhl24a
ENSDARG00000021806	IPR000571	Znf_CCCH	zfp36l2
ENSDARG00000021833	IPR011598	bHLH_dom	ahr2
ENSDARG00000021855	IPR001067, IPR011598	Nuc_translocat, bHLH_dom	arnt
ENSDARG00000021891	IPR007087, IPR013069, IPR015880	Znf_C2H2, BTB_POZ, Znf_C2H2-like	ZBTB7B
ENSDARG00000021916	IPR000047, IPR001356, IPR009057	HTH_motif, Homeobox_dom, Homeodomain-like	vax1
ENSDARG00000021938	IPR001132, IPR003619, IPR008984, IPR013019	SMAD_dom_Dwarfin-type, MAD_homology1_Dwarfin-type, SMAD_FHA_domain, MAD_homology_MH1	smad9
ENSDARG00000021959	IPR001356, IPR009057	Homeobox_dom, Homeodomain-like
ENSDARG00000022177	IPR007529	Znf_HIT	ddx59
ENSDARG00000022295	IPR001356, IPR009057, IPR010982	Homeobox_dom, Homeodomain-like, Lambda_DNA-bd_dom	hnf1bb
ENSDARG00000022413	IPR001965	Znf_PHD	ing5a
ENSDARG00000022430	IPR008984	SMAD_FHA_domain	ppp1r8b
ENSDARG00000022569	IPR000047, IPR001356, IPR009057	HTH_motif, Homeobox_dom, Homeodomain-like	nkx6.1
ENSDARG00000022712	IPR008967, IPR013801, IPR015988	p53-like_TF_DNA-bd, STAT_TF_DNA-bd, STAT_TF_coiled-coil	stat3
ENSDARG00000022718	IPR009057	Homeodomain-like	casp8ap2
ENSDARG00000022904	IPR009061, IPR010919	DNA-bd_dom_put, SAND_dom-like	skilb
ENSDARG00000022905	IPR007087, IPR015880	Znf_C2H2, Znf_C2H2-like	si:dkey-20i20.12
ENSDARG00000022944	IPR010770	SGT1	ecd
ENSDARG00000022952	IPR007087, IPR015880	Znf_C2H2, Znf_C2H2-like	zgc:66448
ENSDARG00000023031	IPR001356, IPR001827, IPR009057	Homeobox_dom, Homeobox_Antennapedia_CS, Homeodomain-like	hoxa2b
ENSDARG00000023040	IPR007087, IPR013069, IPR015880	Znf_C2H2, BTB_POZ, Znf_C2H2-like	zbtb1
ENSDARG00000023058	IPR001766	TF_fork_head	foxo3a
ENSDARG00000023217	IPR001630, IPR004827	Leuzip_CREB, bZIP	crema
ENSDARG00000023272	IPR013854	TF_AP2_C	tfap2d
ENSDARG00000023316	IPR010578, IPR011598	SIM_C, bHLH_dom	sim1a
ENSDARG00000023362	IPR000536, IPR001628, IPR001723, IPR008946	Nucl_hrmn_rcpt_lig-bd_core, Znf_hrmn_rcpt, Str_hrmn_rcpt, Nucl_hormone_rcpt_ligand-bd	nr5a1b
ENSDARG00000023537	IPR011598	bHLH_dom	ahr1b
ENSDARG00000023903	IPR004827, IPR007087, IPR016378	bZIP, Znf_C2H2, TF_CRE-BP1-typ	atf2
ENSDARG00000023916	IPR004018	RPEL_repeat	PHACTR1
ENSDARG00000023927	IPR007872	Znf_DHP	dnajc24
ENSDARG00000023933	IPR009061, IPR010919	DNA-bd_dom_put, SAND_dom-like	skila
ENSDARG00000023950	IPR007529	Znf_HIT	znhit3
ENSDARG00000024109	IPR000182	GNAT_dom	naa40
ENSDARG00000024195	IPR007087, IPR015880	Znf_C2H2, Znf_C2H2-like	znf395b
ENSDARG00000024306	IPR003656	Znf_BED	zbed4
ENSDARG00000024416	IPR005576	RNA_pol_Rpb7_N	twistnb
ENSDARG00000024431	IPR003118	Pointed_dom	ETS1
ENSDARG00000024598	IPR001356, IPR009057	Homeobox_dom, Homeodomain-like	homezb
ENSDARG00000024619	IPR001766	TF_fork_head	FOXO6 (1 of 2)
ENSDARG00000024844	IPR011598	bHLH_dom	max
ENSDARG00000024894	IPR001699, IPR008967	TF_T-box, p53-like_TF_DNA-bd	tbx5a
ENSDARG00000025017	IPR001214, IPR007087, IPR015880	SET_dom, Znf_C2H2, Znf_C2H2-like	prdm8
ENSDARG00000025032	IPR000536, IPR001409, IPR001628, IPR001723, IPR008946	Nucl_hrmn_rcpt_lig-bd_core, Glcrtcd_rcpt, Znf_hrmn_rcpt, Str_hrmn_rcpt, Nucl_hormone_rcpt_ligand-bd	nr3c1
ENSDARG00000025131	IPR000047, IPR001356, IPR009057	HTH_motif, Homeobox_dom, Homeodomain-like	lbx2
ENSDARG00000025187	IPR001356, IPR009057	Homeobox_dom, Homeodomain-like	six6a
ENSDARG00000025226	IPR007087, IPR015880	Znf_C2H2, Znf_C2H2-like	znf668
ENSDARG00000025301	IPR006821	Intermed_filament_DNA-bd	gfap
ENSDARG00000025309	IPR001965	Znf_PHD	dpf3
ENSDARG00000025346	IPR007087, IPR015880	Znf_C2H2, Znf_C2H2-like	znf277
ENSDARG00000025495	IPR011598	bHLH_dom	nhlh2
ENSDARG00000025641	IPR007087, IPR015880	Znf_C2H2, Znf_C2H2-like	gli2a
ENSDARG00000025699	IPR001739, IPR002857, IPR016177	Methyl_CpG_DNA-bd, Znf_CXXC, DNA-bd_dom	mbd1b
ENSDARG00000025718	IPR001965, IPR002857	Znf_PHD, Znf_CXXC	cxxc1b
ENSDARG00000025789	IPR000330, IPR000953, IPR001965, IPR012957, IPR012958, IPR016197	SNF2_N, Chromo/shadow_dom, Znf_PHD, CHD_C2, CHD_N, Chromodomain-like	chd4b
ENSDARG00000025808	IPR007582	TFIID-su_WD40-assoc_reg	taf5l
ENSDARG00000025820	IPR008984	SMAD_FHA_domain	chek2
ENSDARG00000025824	IPR001005, IPR009057	SANT/Myb, Homeodomain-like	dmtf1
ENSDARG00000025847	IPR009071	HMG_box_dom	sox12
ENSDARG00000025891	IPR000047, IPR001356, IPR003654, IPR009057	HTH_motif, Homeobox_dom, OAR_dom, Homeodomain-like	shox
ENSDARG00000025899	IPR000047, IPR001356, IPR009057	HTH_motif, Homeobox_dom, Homeodomain-like	pnx
ENSDARG00000025983	IPR002515, IPR004092	Znf_C2HC, Mbt	l3mbtl3
ENSDARG00000026053	IPR000330	SNF2_N	hltf
ENSDARG00000026183	IPR000783, IPR005571	RNA_pol_subH/Rpb5_C, RNA_pol_Rpb5_N	polr2eb
ENSDARG00000026225	IPR001214, IPR001965, IPR003616, IPR006560	SET_dom, Znf_PHD, Post-SET_dom, AWS_dom	whsc1
ENSDARG00000026395	IPR003150	DNA-bd_RFX	rfx4
ENSDARG00000026453	IPR003656, IPR007087, IPR015880	Znf_BED, Znf_C2H2, Znf_C2H2-like	zgc:66474
ENSDARG00000026473	IPR001356, IPR009057	Homeobox_dom, Homeodomain-like	six1b
ENSDARG00000026513	IPR001356, IPR001827, IPR009057	Homeobox_dom, Homeobox_Antennapedia_CS, Homeodomain-like	hoxb6b
ENSDARG00000026599	IPR000047, IPR000747, IPR001356, IPR009057	HTH_motif, Homeodomain_engrailed, Homeobox_dom, Homeodomain-like	eng2a
ENSDARG00000026634	IPR001214, IPR003606, IPR007728	SET_dom, Pre-SET_Zn-bd_sub, Pre-SET_dom	ehmt1b
ENSDARG00000026799	IPR000953, IPR001214, IPR003606, IPR003616, IPR007728, IPR011381, IPR016197	Chromo/shadow_dom, SET_dom, Pre-SET_Zn-bd_sub, Post-SET_dom, Pre-SET_dom, Histone_H3-K9_MeTrfase, Chromodomain-like	suv39h1a
ENSDARG00000026972	IPR007087, IPR015880	Znf_C2H2, Znf_C2H2-like	si:ch211-119o8.6
ENSDARG00000026990	IPR013069	BTB_POZ	klhl6
ENSDARG00000027079	IPR007087	Znf_C2H2	znf804a
ENSDARG00000027082	IPR001356, IPR009057, IPR010982	Homeobox_dom, Homeodomain-like, Lambda_DNA-bd_dom	hmbox1a
ENSDARG00000027109	IPR007087, IPR015880	Znf_C2H2, Znf_C2H2-like	zfr
ENSDARG00000027143	IPR007087, IPR008984	Znf_C2H2, SMAD_FHA_domain	aptx
ENSDARG00000027172	IPR004018	RPEL_repeat	phactr2
ENSDARG00000027187	IPR000953, IPR016197	Chromo/shadow_dom, Chromodomain-like	kat8
ENSDARG00000027199	IPR001132, IPR003619, IPR008984, IPR013019	SMAD_dom_Dwarfin-type, MAD_homology1_Dwarfin-type, SMAD_FHA_domain, MAD_homology_MH1	smad1
ENSDARG00000027353	IPR010507	Znf_MYM	zmym2
ENSDARG00000027403	IPR000571	Znf_CCCH	zgpat
ENSDARG00000027612	IPR000679	Znf_GATA	gatad1
ENSDARG00000027658	IPR001346, IPR008984	Interferon_reg_fact_DNA-bd_dom, SMAD_FHA_domain	irf10
ENSDARG00000027825	IPR000182	GNAT_dom	naa50
ENSDARG00000027933	IPR007087, IPR015880	Znf_C2H2, Znf_C2H2-like	glis1b
ENSDARG00000027938	IPR006642	Znf_Rad18_put	rad18
ENSDARG00000027978	IPR007087, IPR015880	Znf_C2H2, Znf_C2H2-like	yy1b
ENSDARG00000028086	IPR007087, IPR013069, IPR015880	Znf_C2H2, BTB_POZ, Znf_C2H2-like	zbtb2b
ENSDARG00000028148	IPR001523, IPR009057	Paired_dom, Homeodomain-like	pax2a
ENSDARG00000028159	IPR000818, IPR016361	TEA/ATTS, TEF_metazoa	tead1a
ENSDARG00000028228	IPR007087, IPR013069, IPR015880	Znf_C2H2, BTB_POZ, Znf_C2H2-like	zbtb18
ENSDARG00000028295	IPR000571	Znf_CCCH	mkrn4
ENSDARG00000028306	IPR006821	Intermed_filament_DNA-bd	prph
ENSDARG00000028335	IPR000116, IPR000637	HMGI/HMGY, HMGI/Y_DNA-bd_CS	hmga1a
ENSDARG00000028348	IPR001356, IPR001523, IPR009057	Homeobox_dom, Paired_dom, Homeodomain-like	pax3b
ENSDARG00000028431	IPR007087, IPR015880	Znf_C2H2, Znf_C2H2-like	adnp2b
ENSDARG00000028517	IPR009071, IPR013723	HMG_box_dom, Ataxin-1_HBP1	hbp1
ENSDARG00000028539	IPR011124	Znf_CW	morc2
ENSDARG00000028548	IPR013069	BTB_POZ	klhl10b.2
ENSDARG00000028731	IPR008967, IPR013801, IPR015988	p53-like_TF_DNA-bd, STAT_TF_DNA-bd, STAT_TF_coiled-coil	stat4
ENSDARG00000028894	IPR012423	Eaf7/MRGBP	mrgbp
ENSDARG00000028949	IPR007087, IPR013069, IPR015880	Znf_C2H2, BTB_POZ, Znf_C2H2-like	ZBTB26
ENSDARG00000028957	IPR004826, IPR004827, IPR008917	bZIP_Maf, bZIP, TF_DNA-bd	maff
ENSDARG00000029039	IPR001594	Znf_DHHC_palmitoyltrfase	zdhhc23a
ENSDARG00000029043	IPR000571	Znf_CCCH	nupl2
ENSDARG00000029072	IPR007087, IPR015880	Znf_C2H2, Znf_C2H2-like	klf6a
ENSDARG00000029179	IPR001766	TF_fork_head	foxd1
ENSDARG00000029263	IPR001356, IPR001827, IPR009057	Homeobox_dom, Homeobox_Antennapedia_CS, Homeodomain-like	hoxb3a
ENSDARG00000029331	IPR013243, IPR013246	SCA7_dom, SAGA_su_Sgf11	atxn7l3
ENSDARG00000029472	IPR008984	SMAD_FHA_domain	mllt4a
ENSDARG00000029497	IPR007604	CP2	tfcp2l1
ENSDARG00000029544	IPR011598	bHLH_dom	id2b
ENSDARG00000029722	IPR009071	HMG_box_dom	hmgb2a
ENSDARG00000029764	IPR002100	TF_MADSbox	mef2ca
ENSDARG00000029766	IPR000536, IPR001628, IPR001723, IPR008946	Nucl_hrmn_rcpt_lig-bd_core, Znf_hrmn_rcpt, Str_hrmn_rcpt, Nucl_hormone_rcpt_ligand-bd	nr1i2
ENSDARG00000029830	IPR002546, IPR011598	Basic, bHLH_dom	myf6
ENSDARG00000029930	IPR003118	Pointed_dom	SPDEF
ENSDARG00000030058	IPR001699, IPR008967	TF_T-box, p53-like_TF_DNA-bd	tbx4
ENSDARG00000030110	IPR002546, IPR011598	Basic, bHLH_dom	myod1
ENSDARG00000030125	IPR009071	HMG_box_dom	sox7
ENSDARG00000030155	IPR008116	SSDP_DNA-bd	ssbp3b
ENSDARG00000030251	IPR013069	BTB_POZ	klhl36
ENSDARG00000030267	IPR007087, IPR015880	Znf_C2H2, Znf_C2H2-like	gtf3aa
ENSDARG00000030297	IPR009071	HMG_box_dom	sox13
ENSDARG00000030335	IPR000571	Znf_CCCH	zc3h10
ENSDARG00000030347	IPR011598	bHLH_dom	mespba
ENSDARG00000030350	IPR001356, IPR009057	Homeobox_dom, Homeodomain-like	mnx2b
ENSDARG00000030402	IPR011598	bHLH_dom	twist1a
ENSDARG00000030479	IPR009071	HMG_box_dom	hmgb1b
ENSDARG00000030560	IPR000571, IPR011539	Znf_CCCH, RHD	helz
ENSDARG00000030563	IPR001594	Znf_DHHC_palmitoyltrfase	zgc:77880
ENSDARG00000030583	IPR001766, IPR008984	TF_fork_head, SMAD_FHA_domain	foxk2
ENSDARG00000030616	IPR004826, IPR004827, IPR008917	bZIP_Maf, bZIP, TF_DNA-bd	nfe2l1a
ENSDARG00000030703	IPR001356, IPR003025, IPR009057, IPR013851	Homeobox_dom, Otx_TF, Homeodomain-like, Otx_TF_C	otx1a
ENSDARG00000030716	IPR001965	Znf_PHD	ing4
ENSDARG00000030756	IPR001025, IPR001525, IPR002857	BAH_dom, C5_MeTfrase, Znf_CXXC	dnmt1
ENSDARG00000030805	IPR007529	Znf_HIT	znhit2
ENSDARG00000030844	IPR007087, IPR015880	Znf_C2H2, Znf_C2H2-like	klf11a
ENSDARG00000030887	IPR001965	Znf_PHD	phf23a
ENSDARG00000030896	IPR001766	TF_fork_head	foxq1a
ENSDARG00000030999	IPR001005, IPR009057	SANT/Myb, Homeodomain-like	mybl1
ENSDARG00000031046	IPR000536, IPR001628, IPR001723, IPR008946	Nucl_hrmn_rcpt_lig-bd_core, Znf_hrmn_rcpt, Str_hrmn_rcpt, Nucl_hormone_rcpt_ligand-bd	nr1h5
ENSDARG00000031100	IPR013069	BTB_POZ	ivns1abpa
ENSDARG00000031138	IPR001356, IPR003893, IPR008422, IPR009057	Homeobox_dom, Iroquois_homeo, Homeobox_KN_domain, Homeodomain-like	irx3b
ENSDARG00000031161	IPR000536, IPR001628, IPR001723, IPR001728, IPR008946	Nucl_hrmn_rcpt_lig-bd_core, Znf_hrmn_rcpt, Str_hrmn_rcpt, ThyrH_rcpt, Nucl_hormone_rcpt_ligand-bd	nr1d4a
ENSDARG00000031198	IPR009071	HMG_box_dom	hmg20a
ENSDARG00000031222	IPR001356, IPR009057	Homeobox_dom, Homeodomain-like	lhx2b
ENSDARG00000031243	IPR007087, IPR015880	Znf_C2H2, Znf_C2H2-like	snai3
ENSDARG00000031261	IPR012479	SAP30BP	sap30bp
ENSDARG00000031307	IPR007087, IPR015880	Znf_C2H2, Znf_C2H2-like	zic4
ENSDARG00000031316	IPR001356, IPR009057	Homeobox_dom, Homeodomain-like	six6b
ENSDARG00000031337	IPR001356, IPR009057	Homeobox_dom, Homeodomain-like	hoxa10b
ENSDARG00000031383	IPR013069	BTB_POZ	klhl38a
ENSDARG00000031387	IPR001356, IPR009057	Homeobox_dom, Homeodomain-like	cers4a
ENSDARG00000031420	IPR000976, IPR007087, IPR015880	Wilms_tumour_N, Znf_C2H2, Znf_C2H2-like	wt1a
ENSDARG00000031434	IPR000949, IPR001005, IPR009057	ELM2_dom, SANT/Myb, Homeodomain-like	rcor1
ENSDARG00000031562	IPR001005, IPR009057, IPR016827	SANT/Myb, Homeodomain-like, Ada2/TADA2	tada2a
ENSDARG00000031637	IPR000571	Znf_CCCH	pan3
ENSDARG00000031647	IPR008967, IPR013801, IPR015988	p53-like_TF_DNA-bd, STAT_TF_DNA-bd, STAT_TF_coiled-coil	stat2
ENSDARG00000031664	IPR009071	HMG_box_dom	sox21a
ENSDARG00000031683	IPR000837, IPR004827	AP-1, bZIP	fosab
ENSDARG00000031709	IPR005033	YEATS	mllt1b
ENSDARG00000031756	IPR002100	TF_MADSbox	mef2aa
ENSDARG00000031763	IPR001132, IPR003619, IPR008984, IPR013019	SMAD_dom_Dwarfin-type, MAD_homology1_Dwarfin-type, SMAD_FHA_domain, MAD_homology_MH1	smad6b
ENSDARG00000031768	IPR000536, IPR001628, IPR001723, IPR003079, IPR008946	Nucl_hrmn_rcpt_lig-bd_core, Znf_hrmn_rcpt, Str_hrmn_rcpt, ROR_rcpt, Nucl_hormone_rcpt_ligand-bd	roraa
ENSDARG00000031770	IPR002515	Znf_C2HC	kat7b
ENSDARG00000031777	IPR000536, IPR001628, IPR001723, IPR003074, IPR003076, IPR008946	Nucl_hrmn_rcpt_lig-bd_core, Znf_hrmn_rcpt, Str_hrmn_rcpt, 1Cnucl_rcpt, 1Cnucl_rcpt_A, Nucl_hormone_rcpt_ligand-bd	pparaa
ENSDARG00000031848	IPR000536, IPR001628, IPR001723, IPR003074, IPR008946	Nucl_hrmn_rcpt_lig-bd_core, Znf_hrmn_rcpt, Str_hrmn_rcpt, 1Cnucl_rcpt, Nucl_hormone_rcpt_ligand-bd	pparg
ENSDARG00000031891	IPR001699, IPR008967	TF_T-box, p53-like_TF_DNA-bd	tbx1
ENSDARG00000031894	IPR009071, IPR013558	HMG_box_dom, CTNNB1-bd_N	lef1
ENSDARG00000031983	IPR001356, IPR009057	Homeobox_dom, Homeodomain-like	six4b
ENSDARG00000032039	IPR011598	bHLH_dom	mxd1
ENSDARG00000032129	IPR008851	TFIIF-alpha	gtf2f1
ENSDARG00000032197	IPR007087, IPR015880	Znf_C2H2, Znf_C2H2-like	klf12b
ENSDARG00000032221	IPR004018	RPEL_repeat	phactr4b
ENSDARG00000032264	IPR001005, IPR009057	SANT/Myb, Homeodomain-like	mybl2b
ENSDARG00000032272	IPR000182	GNAT_dom	sat1b
ENSDARG00000032285	IPR007087, IPR015880	Znf_C2H2, Znf_C2H2-like	zgc:113294
ENSDARG00000032317	IPR009071	HMG_box_dom	tox
ENSDARG00000032369	IPR013069	BTB_POZ	btbd6b
ENSDARG00000032578	IPR001523, IPR009057	Paired_dom, Homeodomain-like	pax2b
ENSDARG00000032651	IPR000571	Znf_CCCH	ppp1r10
ENSDARG00000032705	IPR001766	TF_fork_head	foxg1b
ENSDARG00000032963	IPR003650, IPR011598	Orange, bHLH_dom	her12
ENSDARG00000032990	IPR002909	IPT	plxnb3
ENSDARG00000033160	IPR000536, IPR001628, IPR001723, IPR001728, IPR008946	Nucl_hrmn_rcpt_lig-bd_core, Znf_hrmn_rcpt, Str_hrmn_rcpt, ThyrH_rcpt, Nucl_hormone_rcpt_ligand-bd	nr1d1
ENSDARG00000033172	IPR000536, IPR001628, IPR001723, IPR003068, IPR008946	Nucl_hrmn_rcpt_lig-bd_core, Znf_hrmn_rcpt, Str_hrmn_rcpt, COUP_TF, Nucl_hormone_rcpt_ligand-bd	nr2f5
ENSDARG00000033498	IPR000536, IPR001628, IPR001723, IPR003079, IPR008946	Nucl_hrmn_rcpt_lig-bd_core, Znf_hrmn_rcpt, Str_hrmn_rcpt, ROR_rcpt, Nucl_hormone_rcpt_ligand-bd	rorb
ENSDARG00000033596	IPR009025, IPR011263	RBP11-like_dimer, DNA-dir_RNA_pol_RpoA/D/Rpb3	polr2c
ENSDARG00000033647	IPR006939, IPR017393	SNF5, SWI_SNF_chromatin_remodel_cplx	smarcb1a
ENSDARG00000033707	IPR001965	Znf_PHD	jade1
ENSDARG00000033889	IPR013256	Chromatin_SPT2	spty2d1
ENSDARG00000033957	IPR000571	Znf_CCCH	trmt44
ENSDARG00000033971	IPR001356, IPR003654, IPR009057	Homeobox_dom, OAR_dom, Homeodomain-like	prrx1a
ENSDARG00000034043	IPR001356, IPR003893, IPR008422, IPR009057	Homeobox_dom, Iroquois_homeo, Homeobox_KN_domain, Homeodomain-like	irx5a
ENSDARG00000034086	IPR000580	TSC-22_Dip_Bun	zgc:65895
ENSDARG00000034117	IPR000536, IPR001628, IPR001723, IPR003078, IPR008946	Nucl_hrmn_rcpt_lig-bd_core, Znf_hrmn_rcpt, Str_hrmn_rcpt, Retinoic_acid_rcpt, Nucl_hormone_rcpt_ligand-bd	rarga
ENSDARG00000034160	IPR008984	SMAD_FHA_domain	slc4a1ap
ENSDARG00000034181	IPR000536, IPR001628, IPR001723, IPR008946	Nucl_hrmn_rcpt_lig-bd_core, Znf_hrmn_rcpt, Str_hrmn_rcpt, Nucl_hormone_rcpt_ligand-bd	esr2b
ENSDARG00000034293	IPR001321, IPR011598	HIF-1_alpha, bHLH_dom	hif1ab
ENSDARG00000034326	IPR001965	Znf_PHD	ing3
ENSDARG00000034420	IPR001356, IPR008422, IPR009057	Homeobox_dom, Homeobox_KN_domain, Homeodomain-like	irx6a
ENSDARG00000034518	IPR001525	C5_MeTfrase	trdmt1
ENSDARG00000034693	IPR001005, IPR009057	SANT/Myb, Homeodomain-like	mysm1
ENSDARG00000034734	IPR007018	Mediator_Med6	med6
ENSDARG00000034757	IPR001594	Znf_DHHC_palmitoyltrfase	zdhhc2
ENSDARG00000034768	IPR001965	Znf_PHD	phf3
ENSDARG00000034785	IPR009061	DNA-bd_dom_put	dachb
ENSDARG00000034893	IPR000536, IPR001628, IPR001723, IPR003078, IPR008946	Nucl_hrmn_rcpt_lig-bd_core, Znf_hrmn_rcpt, Str_hrmn_rcpt, Retinoic_acid_rcpt, Nucl_hormone_rcpt_ligand-bd	rarab
ENSDARG00000034956	IPR002418, IPR011598, IPR012682	Tscrpt_reg_Myc, bHLH_dom, Tscrpt_reg_Myc_N	myclb
ENSDARG00000035066	IPR009071	HMG_box_dom	ubtf
ENSDARG00000035116	IPR007087, IPR015880	Znf_C2H2, Znf_C2H2-like	CR847941.1
ENSDARG00000035127	IPR000003, IPR000536, IPR001628, IPR001723, IPR008946	Retinoid-X_rcpt/HNF4, Nucl_hrmn_rcpt_lig-bd_core, Znf_hrmn_rcpt, Str_hrmn_rcpt, Nucl_hormone_rcpt_ligand-bd	rxrab
ENSDARG00000035146	IPR008193, IPR009025	RNA_pol_Rpb11_13-16kDa_CS, RBP11-like_dimer	polr2j
ENSDARG00000035150	IPR007087, IPR015880	Znf_C2H2, Znf_C2H2-like	si:dkey-261j4.4
ENSDARG00000035151	IPR007087, IPR015880	Znf_C2H2, Znf_C2H2-like	si:dkey-261j4.3
ENSDARG00000035221	IPR007087, IPR015880	Znf_C2H2, Znf_C2H2-like	zgc:110249
ENSDARG00000035264	IPR015285	RIO2_wHTH_N	riok2
ENSDARG00000035285	IPR001005, IPR009057	SANT/Myb, Homeodomain-like	ncor1
ENSDARG00000035290	IPR001275, IPR005173	DM_DNA-bd, DMA	dmrt3a
ENSDARG00000035330	IPR011177	TAF1_animal	taf1
ENSDARG00000035398	IPR013069	BTB_POZ	enc1
ENSDARG00000035434	IPR000571	Znf_CCCH	zmat5
ENSDARG00000035505	IPR010405	COBRA1	nelfb
ENSDARG00000035508	IPR001356, IPR009057	Homeobox_dom, Homeodomain-like	barhl1a
ENSDARG00000035559	IPR002117, IPR008967, IPR011615	p53_tumour_suppressor, p53-like_TF_DNA-bd, p53_DNA-bd	tp53
ENSDARG00000035563	IPR007087	Znf_C2H2	znf703
ENSDARG00000035622	IPR004827	bZIP	xbp1
ENSDARG00000035648	IPR001356, IPR003893, IPR008422, IPR009057	Homeobox_dom, Iroquois_homeo, Homeobox_KN_domain, Homeodomain-like	irx4a
ENSDARG00000035652	IPR000182	GNAT_dom	sat1a.1
ENSDARG00000035680	IPR001766	TF_fork_head	zgc:113424
ENSDARG00000035695	IPR011598	bHLH_dom	scxa
ENSDARG00000035732	IPR001067, IPR011598	Nuc_translocat, bHLH_dom	arntl1b
ENSDARG00000035735	IPR001356, IPR009057	Homeobox_dom, Homeodomain-like	gsx1
ENSDARG00000035776	IPR002052	DNA_methylase_N6_adenine_CS	n6amt1
ENSDARG00000035819	IPR003000	Sirtuin	sirt3
ENSDARG00000035821	IPR006612	Znf_C2CH	si:ch211-173p18.3
ENSDARG00000035823	IPR010507	Znf_MYM	zmym4
ENSDARG00000035887	IPR001356, IPR009057, IPR010982	Homeobox_dom, Homeodomain-like, Lambda_DNA-bd_dom	zgc:91944
ENSDARG00000035889	IPR007087, IPR013069, IPR015880	Znf_C2H2, BTB_POZ, Znf_C2H2-like	zbtb8b
ENSDARG00000035910	IPR007087, IPR015880	Znf_C2H2, Znf_C2H2-like	znf281b
ENSDARG00000035966	IPR000536, IPR001628, IPR001723, IPR008946	Nucl_hrmn_rcpt_lig-bd_core, Znf_hrmn_rcpt, Str_hrmn_rcpt, Nucl_hormone_rcpt_ligand-bd	pgr
ENSDARG00000035984	IPR001356, IPR009057	Homeobox_dom, Homeodomain-like	mnx1
ENSDARG00000036043	IPR001214, IPR007087, IPR015880	SET_dom, Znf_C2H2, Znf_C2H2-like	ZNF408
ENSDARG00000036051	IPR001356, IPR003893, IPR008422, IPR009057	Homeobox_dom, Iroquois_homeo, Homeobox_KN_domain, Homeodomain-like	irx4b
ENSDARG00000036055	IPR006612	Znf_C2CH	thap11
ENSDARG00000036070	IPR001222	Znf_TFIIS	znrd1
ENSDARG00000036071	IPR004598	TFIIH_p52/Tfb2	gtf2h4
ENSDARG00000036073	IPR004827	bZIP	cebpg
ENSDARG00000036074	IPR004827, IPR016468	bZIP, CCAAT/enhancer-binding	cebpa
ENSDARG00000036094	IPR004181	Znf_MIZ	PIAS1 (1 of 2)
ENSDARG00000036096	IPR001132, IPR003619, IPR008984, IPR013019	SMAD_dom_Dwarfin-type, MAD_homology1_Dwarfin-type, SMAD_FHA_domain, MAD_homology_MH1	smad3a
ENSDARG00000036168	IPR002909, IPR008366, IPR008967, IPR011539	IPT, NFAT, p53-like_TF_DNA-bd, RHD	nfatc1
ENSDARG00000036194	IPR001356, IPR003654, IPR009057, IPR016233	Homeobox_dom, OAR_dom, Homeodomain-like, Homeobox_Pitx/unc30	pitx2
ENSDARG00000036235	IPR007087, IPR013069, IPR015880	Znf_C2H2, BTB_POZ, Znf_C2H2-like	zbtb3
ENSDARG00000036254	IPR001356, IPR009057	Homeobox_dom, Homeodomain-like	hoxa13b
ENSDARG00000036292	IPR000047, IPR001356, IPR009057	HTH_motif, Homeobox_dom, Homeodomain-like	cdx4
ENSDARG00000036305	IPR001965	Znf_PHD	phf23b
ENSDARG00000036337	IPR001356, IPR009057	Homeobox_dom, Homeodomain-like	cers3b
ENSDARG00000036430	IPR000182	GNAT_dom	sat2a
ENSDARG00000036489	IPR015257	Maf1	MAF1
ENSDARG00000036542	IPR001356, IPR008422, IPR009057	Homeobox_dom, Homeobox_KN_domain, Homeodomain-like	pknox1.2
ENSDARG00000036567	IPR000182	GNAT_dom	aanat1
ENSDARG00000036569	IPR004826, IPR004827, IPR008917, IPR013069	bZIP_Maf, bZIP, TF_DNA-bd, BTB_POZ	bach2a
ENSDARG00000036592	IPR001214	SET_dom	setd4
ENSDARG00000036593	IPR001965, IPR002857	Znf_PHD, Znf_CXXC	kdm2ba
ENSDARG00000036625	IPR006110, IPR006111	Pol_omega/K/RPB6, RpoK/Rpb6	polr2f
ENSDARG00000036645	IPR000408, IPR013069	Reg_chr_condens, BTB_POZ	rcbtb1
ENSDARG00000036698	IPR007087, IPR015880	Znf_C2H2, Znf_C2H2-like	znf865
ENSDARG00000036754	IPR000079	HMGN_fam	hmgn3
ENSDARG00000036772	IPR001965	Znf_PHD	pygo2
ENSDARG00000036791	IPR001525	C5_MeTfrase	dnmt3bb.1
ENSDARG00000036816	IPR000327, IPR000972, IPR001356, IPR009057, IPR010982, IPR013847	POU_specific, TF_octamer, Homeobox_dom, Homeodomain-like, Lambda_DNA-bd_dom, POU	pou2f2a
ENSDARG00000036855	IPR007087, IPR015880	Znf_C2H2, Znf_C2H2-like	plagx
ENSDARG00000036868	IPR000814	TBP	tbpl1
ENSDARG00000036869	IPR011598	bHLH_dom	tcf21
ENSDARG00000036930	IPR001699, IPR008967	TF_T-box, p53-like_TF_DNA-bd	tbx18
ENSDARG00000036985	IPR002909	IPT	plxnb2b
ENSDARG00000037009	IPR004122	BAF_prot	banf1
ENSDARG00000037020	IPR008984	SMAD_FHA_domain	kif1b
ENSDARG00000037030	IPR007087, IPR015880	Znf_C2H2, Znf_C2H2-like	casz1
ENSDARG00000037060	IPR001214, IPR001965, IPR003616, IPR003888, IPR003889	SET_dom, Znf_PHD, Post-SET_dom, FYrich_N, FYrich_C	kmt2d
ENSDARG00000037068	IPR007087, IPR015880	Znf_C2H2, Znf_C2H2-like	IKZF4
ENSDARG00000037069	IPR001594	Znf_DHHC_palmitoyltrfase	zdhhc14
ENSDARG00000037073	IPR006612	Znf_C2CH	si:dkey-60a16.1
ENSDARG00000037154	IPR007087, IPR015880	Znf_C2H2, Znf_C2H2-like	hivep3b
ENSDARG00000037158	IPR000408	Reg_chr_condens	rcc1
ENSDARG00000037177	IPR000571	Znf_CCCH	zc3h13
ENSDARG00000037178	IPR007087, IPR015880	Znf_C2H2, Znf_C2H2-like	zic2b
ENSDARG00000037192	IPR006612	Znf_C2CH	zgc:113364
ENSDARG00000037196	IPR001606	ARID_dom	ARID5B
ENSDARG00000037238	IPR001132, IPR003619, IPR008984, IPR013019	SMAD_dom_Dwarfin-type, MAD_homology1_Dwarfin-type, SMAD_FHA_domain, MAD_homology_MH1	smad5
ENSDARG00000037291	IPR001965, IPR007087, IPR015880	Znf_PHD, Znf_C2H2, Znf_C2H2-like	dpf2l
ENSDARG00000037324	IPR013069	BTB_POZ	klhl17
ENSDARG00000037383	IPR001523, IPR009057	Paired_dom, Homeodomain-like	pax5
ENSDARG00000037397	IPR000969, IPR009071, IPR013719	SSrcognition, HMG_box_dom, DUF1747	ssrp1a
ENSDARG00000037405	IPR007087, IPR015880	Znf_C2H2, Znf_C2H2-like	zgc:112083
ENSDARG00000037421	IPR007087, IPR015880	Znf_C2H2, Znf_C2H2-like	egr1
ENSDARG00000037475	IPR001766	TF_fork_head	foxb2
ENSDARG00000037514	IPR000286, IPR003084	His_deacetylse, His_deacetylse_1	hdac3
ENSDARG00000037555	IPR011598	bHLH_dom	atoh8
ENSDARG00000037570	IPR008193, IPR009025	RNA_pol_Rpb11_13-16kDa_CS, RBP11-like_dimer	polr1d
ENSDARG00000037588	IPR011598	bHLH_dom	bhlhe23
ENSDARG00000037639	IPR001356, IPR009057	Homeobox_dom, Homeodomain-like	nkx3.2
ENSDARG00000037760	IPR001356, IPR009057	Homeobox_dom, Homeodomain-like	uncx4.1
ENSDARG00000037782	IPR009071	HMG_box_dom	sox8b
ENSDARG00000037833	IPR011598	bHLH_dom	mitfb
ENSDARG00000037835	IPR001222, IPR001529	Znf_TFIIS, DNA-dir_RNA_pol_M/15kDasu	polr3k
ENSDARG00000037838	IPR000571	Znf_CCCH	unkl
ENSDARG00000037855	IPR006809	TAFII28	taf11
ENSDARG00000037872	IPR001766, IPR008984	TF_fork_head, SMAD_FHA_domain	foxk1
ENSDARG00000037891	IPR011598	bHLH_dom	mlx
ENSDARG00000037894	IPR001005, IPR001214	SANT/Myb, SET_dom	ezh1
ENSDARG00000037930	IPR000571	Znf_CCCH	rnf113a
ENSDARG00000037964	IPR001356, IPR009057	Homeobox_dom, Homeodomain-like	lhx2a
ENSDARG00000038006	IPR007087, IPR015880	Znf_C2H2, Znf_C2H2-like	osr2
ENSDARG00000038025	IPR000953, IPR016197	Chromo/shadow_dom, Chromodomain-like	cbx7a
ENSDARG00000038114	IPR000465, IPR009061	XPA, DNA-bd_dom_put	xpa
ENSDARG00000038133	IPR000770, IPR001965, IPR010919	SAND_dom, Znf_PHD, SAND_dom-like	zgc:113411
ENSDARG00000038141	IPR004827	bZIP	atf4b
ENSDARG00000038159	IPR009071, IPR013558	HMG_box_dom, CTNNB1-bd_N	tcf7l1a
ENSDARG00000038205	IPR003650, IPR011598	Orange, bHLH_dom	her2
ENSDARG00000038243	IPR007087, IPR015880	Znf_C2H2, Znf_C2H2-like	e4f1
ENSDARG00000038305	IPR011520	Vg_Tdu	VGLL3
ENSDARG00000038306	IPR000580	TSC-22_Dip_Bun	tsc22d1
ENSDARG00000038386	IPR011598	bHLH_dom	ascl1a
ENSDARG00000038476	IPR007087, IPR015880	Znf_C2H2, Znf_C2H2-like	si:dkeyp-68b7.7
ENSDARG00000038561	IPR007087, IPR015880	Znf_C2H2, Znf_C2H2-like	klf6b
ENSDARG00000038672	IPR009071, IPR013558	HMG_box_dom, CTNNB1-bd_N	tcf7
ENSDARG00000038687	IPR000451, IPR002909, IPR008967, IPR011539	NFkB/Dor, IPT, p53-like_TF_DNA-bd, RHD	nfkb2
ENSDARG00000038737	IPR001965, IPR007087	Znf_PHD, Znf_C2H2	phf20b
ENSDARG00000038780	IPR009071	HMG_box_dom	ubtfl
ENSDARG00000038792	IPR007087, IPR015880	Znf_C2H2, Znf_C2H2-like	klf17
ENSDARG00000038801	IPR013069	BTB_POZ	klhl20
ENSDARG00000038812	IPR003316	E2F_WHTH_DNA-bd_dom	e2f5
ENSDARG00000038858	IPR001214, IPR017155	SET_dom, Hist-Lys_N-MeTrfase_SET	setd7
ENSDARG00000038868	IPR000047, IPR000747, IPR001356, IPR009057	HTH_motif, Homeodomain_engrailed, Homeobox_dom, Homeodomain-like	eng2b
ENSDARG00000038985	IPR000953, IPR016197	Chromo/shadow_dom, Chromodomain-like	cdyl
ENSDARG00000038995	IPR002848	Translin	tsnax
ENSDARG00000039052	IPR013069	BTB_POZ	klhl40a
ENSDARG00000039066	IPR013069	BTB_POZ	klhl31
ENSDARG00000039082	IPR000571	Znf_CCCH	zgc:123010
ENSDARG00000039095	IPR001356, IPR009057	Homeobox_dom, Homeodomain-like	nkx2.3
ENSDARG00000039116	IPR000536, IPR001628, IPR001723, IPR008946	Nucl_hrmn_rcpt_lig-bd_core, Znf_hrmn_rcpt, Str_hrmn_rcpt, Nucl_hormone_rcpt_ligand-bd	nr5a5
ENSDARG00000039117	IPR004827	bZIP	tefa
ENSDARG00000039185	IPR003956, IPR003958	Transcrpt_fac_NFYB/HAP3_CS, CBFA_NFYB_domain	nfyba
ENSDARG00000039217	IPR001025	BAH_dom	orc1
ENSDARG00000039222	IPR007087	Znf_C2H2	mpl
ENSDARG00000039255	IPR013069	BTB_POZ	klhl21
ENSDARG00000039263	IPR007087, IPR013069, IPR015880	Znf_C2H2, BTB_POZ, Znf_C2H2-like	zbtb48
ENSDARG00000039302	IPR001005, IPR009057	SANT/Myb, Homeodomain-like	terfa
ENSDARG00000039304	IPR001356, IPR009057	Homeobox_dom, Homeodomain-like	six1a
ENSDARG00000039400	IPR001514, IPR009025, IPR011263	DNA-dir_RNA_pol_30-40kDasu_CS, RBP11-like_dimer, DNA-dir_RNA_pol_RpoA/D/Rpb3	polr1c
ENSDARG00000039412	IPR001275, IPR005173	DM_DNA-bd, DMA	dmrta2
ENSDARG00000039458	IPR001356, IPR009057	Homeobox_dom, Homeodomain-like	lhx4
ENSDARG00000039493	IPR000182	GNAT_dom	naa20
ENSDARG00000039499	IPR011256	Reg_factor_effector_dom	soul2
ENSDARG00000039515	IPR004827	bZIP	atf4a
ENSDARG00000039569	IPR000047, IPR001356, IPR009057	HTH_motif, Homeobox_dom, Homeodomain-like	emx1
ENSDARG00000039602	IPR011598	bHLH_dom	atoh1c
ENSDARG00000039684	IPR003000	Sirtuin	sirt5
ENSDARG00000039701	IPR000047, IPR001356, IPR009057	HTH_motif, Homeobox_dom, Homeodomain-like	emx2
ENSDARG00000039756	IPR001356, IPR009057	Homeobox_dom, Homeodomain-like	prop1
ENSDARG00000039806	IPR001699, IPR002070, IPR008967	TF_T-box, TF_Brachyury, p53-like_TF_DNA-bd	tb
ENSDARG00000039843	IPR007087, IPR015880	Znf_C2H2, Znf_C2H2-like	znf800b
ENSDARG00000039892	IPR000182	GNAT_dom	gnpnat1
ENSDARG00000039899	IPR007087, IPR013069, IPR015880	Znf_C2H2, BTB_POZ, Znf_C2H2-like	zbtb7a
ENSDARG00000039915	IPR002634	BolA	bola1
ENSDARG00000039987	IPR007087, IPR015880	Znf_C2H2, Znf_C2H2-like	hivep2a
ENSDARG00000040004	IPR002909	IPT	PKHD1L1 (1 of 2)
ENSDARG00000040008	IPR011598, IPR016637	bHLH_dom, TF_bHLH_NeuroD	neurod6a
ENSDARG00000040033	IPR002052	DNA_methylase_N6_adenine_CS	trmt11
ENSDARG00000040036	IPR008984	SMAD_FHA_domain	tcf19l
ENSDARG00000040046	IPR007087, IPR015880	Znf_C2H2, Znf_C2H2-like	snai2
ENSDARG00000040080	IPR000418, IPR003118	Ets_dom, Pointed_dom	fli1b
ENSDARG00000040116	IPR007087, IPR015880	Znf_C2H2, Znf_C2H2-like	znf366
ENSDARG00000040123	IPR007087, IPR015880	Znf_C2H2, Znf_C2H2-like	zfpm2a
ENSDARG00000040135	IPR000837, IPR004827	AP-1, bZIP	fosaa
ENSDARG00000040137	IPR000837, IPR004827	AP-1, bZIP	jdp2a
ENSDARG00000040141	IPR007087, IPR015880	Znf_C2H2, Znf_C2H2-like	si:ch73-138e16.5
ENSDARG00000040144	IPR007087, IPR015880	Znf_C2H2, Znf_C2H2-like	CABZ01081730.1
ENSDARG00000040179	IPR007087, IPR015880	Znf_C2H2, Znf_C2H2-like	zgc:101562
ENSDARG00000040214	IPR007087, IPR015880	Znf_C2H2, Znf_C2H2-like	scrt1b
ENSDARG00000040237	IPR002100	TF_MADSbox	mef2d
ENSDARG00000040253	IPR001356, IPR003350, IPR009057, IPR010982	Homeobox_dom, CUT_dom, Homeodomain-like, Lambda_DNA-bd_dom	onecutl
ENSDARG00000040261	IPR000040, IPR008967, IPR013524, IPR016554	AML1_Runt, p53-like_TF_DNA-bd, Runt_dom, TF_Runt-rel_RUNX	runx2a
ENSDARG00000040266	IPR009071	HMG_box_dom	sox19b
ENSDARG00000040278	IPR013069	BTB_POZ	klhl38b
ENSDARG00000040303	IPR008984	SMAD_FHA_domain	nbn
ENSDARG00000040321	IPR001356, IPR003654, IPR009057	Homeobox_dom, OAR_dom, Homeodomain-like	rx2
ENSDARG00000040432	IPR007087, IPR015880	Znf_C2H2, Znf_C2H2-like	klf2b
ENSDARG00000040443	IPR001222, IPR001529	Znf_TFIIS, DNA-dir_RNA_pol_M/15kDasu	polr2i
ENSDARG00000040465	IPR001346	Interferon_reg_fact_DNA-bd_dom	irf2
ENSDARG00000040487	IPR001356, IPR009057, IPR009071	Homeobox_dom, Homeodomain-like, HMG_box_dom	zgc:113176
ENSDARG00000040503	IPR000571	Znf_CCCH	CABZ01070258.1
ENSDARG00000040528	IPR013069	BTB_POZ	lgals3bpb
ENSDARG00000040584	IPR002052	DNA_methylase_N6_adenine_CS	n6amt2
ENSDARG00000040606	IPR013854	TF_AP2_C	tfap2c
ENSDARG00000040623	IPR000837, IPR004827	AP-1, bZIP	fosl2
ENSDARG00000040725	IPR000571	Znf_CCCH	zgc:114130
ENSDARG00000040764	IPR011598	bHLH_dom	id1
ENSDARG00000040884	IPR011598	bHLH_dom	mxi1
ENSDARG00000040911	IPR001356, IPR009057	Homeobox_dom, Homeodomain-like	meox2a
ENSDARG00000040917	IPR003417	CBF_beta	cbfb
ENSDARG00000040926	IPR000536, IPR001628, IPR001723, IPR003068, IPR008946	Nucl_hrmn_rcpt_lig-bd_core, Znf_hrmn_rcpt, Str_hrmn_rcpt, COUP_TF, Nucl_hormone_rcpt_ligand-bd	nr2f2
ENSDARG00000040946	IPR011598	bHLH_dom	olig2
ENSDARG00000040948	IPR011598	bHLH_dom	olig1
ENSDARG00000040955	IPR000047, IPR001356, IPR009057	HTH_motif, Homeobox_dom, Homeodomain-like	dharma
ENSDARG00000041051	IPR009786	Spot_14	mid1ip1a
ENSDARG00000041072	IPR000949, IPR001005, IPR009057	ELM2_dom, SANT/Myb, Homeodomain-like	mier1a
ENSDARG00000041080	IPR006612	Znf_C2CH	thap3
ENSDARG00000041081	IPR001214	SET_dom	suv420h1
ENSDARG00000041098	IPR000047, IPR001356, IPR009057	HTH_motif, Homeobox_dom, Homeodomain-like	barx2
ENSDARG00000041155	IPR000953, IPR008676, IPR016197	Chromo/shadow_dom, MRG, Chromodomain-like	morf4l1
ENSDARG00000041203	IPR003958	CBFA_NFYB_domain	drap1
ENSDARG00000041243	IPR001214, IPR001739, IPR003606, IPR007728, IPR016177	SET_dom, Methyl_CpG_DNA-bd, Pre-SET_Zn-bd_sub, Pre-SET_dom, DNA-bd_dom	setdb1a
ENSDARG00000041323	IPR002059, IPR011129	CSP_DNA-bd, Cold_shock_prot	csdc2a
ENSDARG00000041359	IPR003656	Znf_BED	zgc:161969
ENSDARG00000041381	IPR001067, IPR011598	Nuc_translocat, bHLH_dom	arntl2
ENSDARG00000041411	IPR010995	DNA_repair_Rad51/TF_NusA_a-hlx	rad51
ENSDARG00000041572	IPR007087, IPR015880	Znf_C2H2, Znf_C2H2-like	zfpm1
ENSDARG00000041581	IPR007087, IPR015880	Znf_C2H2, Znf_C2H2-like	znf143b
ENSDARG00000041665	IPR000571	Znf_CCCH	mkrn1
ENSDARG00000041689	IPR011598	bHLH_dom	usf1
ENSDARG00000041691	IPR003650, IPR011598	Orange, bHLH_dom	bhlhe41
ENSDARG00000041702	IPR003150	DNA-bd_RFX	rfx6
ENSDARG00000041706	IPR011520	Vg_Tdu	vgll2a
ENSDARG00000041708	IPR000182	GNAT_dom	csrp2bp
ENSDARG00000041830	IPR002848	Translin	tsn
ENSDARG00000041839	IPR000580	TSC-22_Dip_Bun	tsc22d2
ENSDARG00000041910	IPR007087, IPR015880	Znf_C2H2, Znf_C2H2-like	znf512
ENSDARG00000041952	IPR009057	Homeodomain-like	prox2
ENSDARG00000042004	IPR001289	TF_CBFB	nfya
ENSDARG00000042005	IPR000182, IPR005910	GNAT_dom, Hist_AcTrfase_ELP3	elp3
ENSDARG00000042027	IPR001356, IPR003654, IPR009057	Homeobox_dom, OAR_dom, Homeodomain-like	prrx1b
ENSDARG00000042029	IPR001739, IPR016177	Methyl_CpG_DNA-bd, DNA-bd_dom	mbd3b
ENSDARG00000042032	IPR000327, IPR001356, IPR009057, IPR010982, IPR013847, IPR016362	POU_specific, Homeobox_dom, Homeodomain-like, Lambda_DNA-bd_dom, POU, TF_POU_3	pou3f3a
ENSDARG00000042041	IPR011598	bHLH_dom	tal2
ENSDARG00000042045	IPR009071	HMG_box_dom	hmg20b
ENSDARG00000042054	IPR007811	RPC4	zgc:171971
ENSDARG00000042057	IPR007087, IPR015880	Znf_C2H2, Znf_C2H2-like	trmt1l
ENSDARG00000042087	IPR008468	DMAP1	dmap1
ENSDARG00000042091	IPR013069	BTB_POZ	btbd2a
ENSDARG00000042106	IPR001356, IPR009057	Homeobox_dom, Homeodomain-like	mnx2a
ENSDARG00000042145	IPR001356, IPR009057	Homeobox_dom, Homeodomain-like	lhx8b
ENSDARG00000042151	IPR009061, IPR010919	DNA-bd_dom_put, SAND_dom-like	skia
ENSDARG00000042180	IPR001766	TF_fork_head	foxl2
ENSDARG00000042215	IPR004181	Znf_MIZ	pias4b
ENSDARG00000042236	IPR000330	SNF2_N	atrx
ENSDARG00000042291	IPR000047, IPR001356, IPR009057	HTH_motif, Homeobox_dom, Homeodomain-like	dlx6a
ENSDARG00000042296	IPR000047, IPR001356, IPR009057	HTH_motif, Homeobox_dom, Homeodomain-like	dlx5a
ENSDARG00000042337	IPR003958	CBFA_NFYB_domain	chrac1
ENSDARG00000042383	IPR007087, IPR013069, IPR015880	Znf_C2H2, BTB_POZ, Znf_C2H2-like	zbtb25
ENSDARG00000042477	IPR000536, IPR001628, IPR001723, IPR008946	Nucl_hrmn_rcpt_lig-bd_core, Znf_hrmn_rcpt, Str_hrmn_rcpt, Nucl_hormone_rcpt_ligand-bd	nr2c2
ENSDARG00000042484	IPR009146	Groucho_enhance	tle2
ENSDARG00000042485	IPR001766	TF_fork_head	foxd5
ENSDARG00000042489	IPR006612	Znf_C2CH	prkrira
ENSDARG00000042492	IPR006612	Znf_C2CH	si:dkey-250d21.1
ENSDARG00000042496	IPR000571	Znf_CCCH	parp12a
ENSDARG00000042525	IPR002909	IPT	ebf2
ENSDARG00000042526	IPR001356, IPR009057	Homeobox_dom, Homeodomain-like	sebox
ENSDARG00000042563	IPR001005, IPR009057, IPR015216	SANT/Myb, Homeodomain-like, SANTA	mis18bp1
ENSDARG00000042577	IPR000837, IPR004827	AP-1, bZIP	batf3
ENSDARG00000042630	IPR011256	Reg_factor_effector_dom	hebp2
ENSDARG00000042652	IPR007087, IPR015880	Znf_C2H2, Znf_C2H2-like	rreb1b
ENSDARG00000042667	IPR007087, IPR015880	Znf_C2H2, Znf_C2H2-like	klf2a
ENSDARG00000042689	IPR007087, IPR013069, IPR015880	Znf_C2H2, BTB_POZ, Znf_C2H2-like	zbtb37
ENSDARG00000042724	IPR005100, IPR017071	TF_Spt5_NGN-domain, TF_Spt5	supt5h
ENSDARG00000042725	IPR004827, IPR016468	bZIP, CCAAT/enhancer-binding	cebpb
ENSDARG00000042785	IPR001356, IPR003654, IPR009057, IPR016233	Homeobox_dom, OAR_dom, Homeodomain-like, Homeobox_Pitx/unc30	pitx1
ENSDARG00000042796	IPR007087, IPR015880	Znf_C2H2, Znf_C2H2-like	yy1a
ENSDARG00000042824	IPR004826, IPR004827, IPR008917	bZIP_Maf, bZIP, TF_DNA-bd	nfe2l2a
ENSDARG00000042826	IPR007087, IPR015880	Znf_C2H2, Znf_C2H2-like	egr2b
ENSDARG00000042835	IPR003316, IPR014889, IPR015648	E2F_WHTH_DNA-bd_dom, Transc_factor_DP_C, Transcrpt_fac_DP	tfdp2
ENSDARG00000042857	IPR011598	bHLH_dom	si:ch211-246m6.4
ENSDARG00000042872	IPR001594	Znf_DHHC_palmitoyltrfase	zdhhc8a
ENSDARG00000042904	IPR001766	TF_fork_head	foxo3b
ENSDARG00000042969	IPR007087, IPR015880	Znf_C2H2, Znf_C2H2-like	si:dkeyp-84f3.7
ENSDARG00000042977	IPR004827, IPR010533, IPR016743	bZIP, Vert_IL3-reg_TF, NFIL3/E4BP4	nfil3
ENSDARG00000042989	IPR007087, IPR015880	Znf_C2H2, Znf_C2H2-like	si:dkeyp-84f3.5
ENSDARG00000043126	IPR007087, IPR015880	Znf_C2H2, Znf_C2H2-like	blf
ENSDARG00000043185	IPR005033	YEATS	mllt1a
ENSDARG00000043210	IPR000647, IPR003619	CTF/NFI, MAD_homology1_Dwarfin-type	nfic
ENSDARG00000043226	IPR000647, IPR003619	CTF/NFI, MAD_homology1_Dwarfin-type	nfixa
ENSDARG00000043237	IPR004827	bZIP	nfil3-2
ENSDARG00000043249	IPR001346	Interferon_reg_fact_DNA-bd_dom	irf1b
ENSDARG00000043271	IPR011124	Znf_CW	morc3b
ENSDARG00000043285	IPR007087, IPR013069, IPR015880	Znf_C2H2, BTB_POZ, Znf_C2H2-like	zbtb21
ENSDARG00000043322	IPR001356, IPR009057	Homeobox_dom, Homeodomain-like	gsx2
ENSDARG00000043360	IPR007872	Znf_DHP	dph3
ENSDARG00000043483	IPR001356, IPR003025, IPR009057, IPR013851	Homeobox_dom, Otx_TF, Homeodomain-like, Otx_TF_C	otx5
ENSDARG00000043492	IPR001346	Interferon_reg_fact_DNA-bd_dom	irf1a
ENSDARG00000043531	IPR002112, IPR004827, IPR008917	Leuzip_Jun, bZIP, TF_DNA-bd	jun
ENSDARG00000043553	IPR001766	TF_fork_head	ches1
ENSDARG00000043713	IPR006818	Histone_chaperone_ASF1-like	asf1bb
ENSDARG00000043797	IPR001005, IPR009057	SANT/Myb, Homeodomain-like	cdc5l
ENSDARG00000043799	IPR013069	BTB_POZ	KLHL29 (1 of 2)
ENSDARG00000043821	IPR007087, IPR015880	Znf_C2H2, Znf_C2H2-like	klf7b
ENSDARG00000043873	IPR001606, IPR016197	ARID_dom, Chromodomain-like	arid4a
ENSDARG00000043923	IPR009071	HMG_box_dom	sox9b
ENSDARG00000043973	IPR007087, IPR015880	Znf_C2H2, Znf_C2H2-like	znf292b
ENSDARG00000043986	IPR001214	SET_dom	setd6
ENSDARG00000044038	IPR007087, IPR013069, IPR015880	Znf_C2H2, BTB_POZ, Znf_C2H2-like	zbtb2a
ENSDARG00000044098	IPR007087, IPR015880	Znf_C2H2, Znf_C2H2-like	egr2a
ENSDARG00000044102	IPR007087	Znf_C2H2	znf593
ENSDARG00000044155	IPR004826, IPR004827, IPR008917	bZIP_Maf, bZIP, TF_DNA-bd	mafa
ENSDARG00000044301	IPR001630, IPR004827	Leuzip_CREB, bZIP	atf1
ENSDARG00000044356	IPR002117, IPR008967, IPR011615	p53_tumour_suppressor, p53-like_TF_DNA-bd, p53_DNA-bd	tp63
ENSDARG00000044375	IPR000327, IPR001356, IPR009057, IPR010982, IPR013847	POU_specific, Homeobox_dom, Homeodomain-like, Lambda_DNA-bd_dom, POU	zgc:158291
ENSDARG00000044457	IPR007087, IPR015880	Znf_C2H2, Znf_C2H2-like	gfi1ab
ENSDARG00000044485	IPR007087, IPR015880	Znf_C2H2, Znf_C2H2-like	sall4
ENSDARG00000044501	IPR006821	Intermed_filament_DNA-bd	viml
ENSDARG00000044511	IPR000418, IPR006715	Ets_dom, ETS_PEA3_N	etv5b
ENSDARG00000044525	IPR000536, IPR001628, IPR001723, IPR003074, IPR003075, IPR008946	Nucl_hrmn_rcpt_lig-bd_core, Znf_hrmn_rcpt, Str_hrmn_rcpt, 1Cnucl_rcpt, 1Cnucl_rcpt_B, Nucl_hormone_rcpt_ligand-bd	pparda
ENSDARG00000044532	IPR000536, IPR001628, IPR001723, IPR003070, IPR003073, IPR008946	Nucl_hrmn_rcpt_lig-bd_core, Znf_hrmn_rcpt, Str_hrmn_rcpt, Nuc_orph_rcpt, NURR_rcpt, Nucl_hormone_rcpt_ligand-bd	nr4a2b
ENSDARG00000044550	IPR011598	bHLH_dom	hif1al2
ENSDARG00000044685	IPR000536, IPR001723, IPR008946	Nucl_hrmn_rcpt_lig-bd_core, Str_hrmn_rcpt, Nucl_hormone_rcpt_ligand-bd	nr0b2a
ENSDARG00000044774	IPR000327, IPR001356, IPR009057, IPR010982, IPR013847	POU_specific, Homeobox_dom, Homeodomain-like, Lambda_DNA-bd_dom, POU	pou5f3
ENSDARG00000044847	IPR007087, IPR015880	Znf_C2H2, Znf_C2H2-like	zgc:171599
ENSDARG00000044915	IPR004092	Mbt	sfmbt1
ENSDARG00000044938	IPR000953, IPR016197	Chromo/shadow_dom, Chromodomain-like	cbx2
ENSDARG00000044949	IPR008984	SMAD_FHA_domain	rnf8
ENSDARG00000045094	IPR001132, IPR003619, IPR008984, IPR013019	SMAD_dom_Dwarfin-type, MAD_homology1_Dwarfin-type, SMAD_FHA_domain, MAD_homology_MH1	si:dkey-222b8.1
ENSDARG00000045105	IPR001766	TF_fork_head	foxn2b
ENSDARG00000045130	IPR013069	BTB_POZ	klhl11
ENSDARG00000045131	IPR011598	bHLH_dom	id4
ENSDARG00000045155	IPR005345	PHF5	phf5a
ENSDARG00000045159	IPR001594	Znf_DHHC_palmitoyltrfase	zdhhc4
ENSDARG00000045166	IPR011598	bHLH_dom	bhlha15
ENSDARG00000045275	IPR013069	BTB_POZ	klhl14
ENSDARG00000045308	IPR015088	Znf_DNA-dir_DNA_pol_B_alpha	pola1
ENSDARG00000045353	IPR011598	bHLH_dom	MSC
ENSDARG00000045371	IPR001214, IPR007087, IPR015880	SET_dom, Znf_C2H2, Znf_C2H2-like	prdm14
ENSDARG00000045401	IPR001965	Znf_PHD	mllt10
ENSDARG00000045413	IPR003902	Tscrpt_reg_GCM	gcm2
ENSDARG00000045513	IPR001965	Znf_PHD	taf3
ENSDARG00000045519	IPR004092	Mbt	sfmbt2
ENSDARG00000045527	IPR000536, IPR001628, IPR001723, IPR008946	Nucl_hrmn_rcpt_lig-bd_core, Znf_hrmn_rcpt, Str_hrmn_rcpt, Nucl_hormone_rcpt_ligand-bd	nr2c1
ENSDARG00000045530	IPR000571	Znf_CCCH	si:ch211-244b2.4
ENSDARG00000045565	IPR005612	CCAAT-binding_factor	noc4l
ENSDARG00000045595	IPR007087, IPR015880	Znf_C2H2, Znf_C2H2-like	si:dkey-14k9.3
ENSDARG00000045611	IPR003956, IPR003958	Transcrpt_fac_NFYB/HAP3_CS, CBFA_NFYB_domain	nfybb
ENSDARG00000045626	IPR000408	Reg_chr_condens	nek8
ENSDARG00000045660	IPR007087, IPR013069, IPR015880	Znf_C2H2, BTB_POZ, Znf_C2H2-like	hic1l
ENSDARG00000045661	IPR001346, IPR008984	Interferon_reg_fact_DNA-bd_dom, SMAD_FHA_domain	irf7
ENSDARG00000045681	IPR001346, IPR008984	Interferon_reg_fact_DNA-bd_dom, SMAD_FHA_domain	irf5
ENSDARG00000045695	IPR002418, IPR003327, IPR011598, IPR012682	Tscrpt_reg_Myc, Myc-LZ, bHLH_dom, Tscrpt_reg_Myc_N	myca
ENSDARG00000045842	IPR001005	SANT/Myb	zgc:113263
ENSDARG00000045857	IPR005612	CCAAT-binding_factor	cebpz
ENSDARG00000045874	IPR005033	YEATS	yeats4
ENSDARG00000045904	IPR000536, IPR001628, IPR001723, IPR008946	Nucl_hrmn_rcpt_lig-bd_core, Znf_hrmn_rcpt, Str_hrmn_rcpt, Nucl_hormone_rcpt_ligand-bd	nr2e3
ENSDARG00000045911	IPR000007	Tubby_C	tulp4a
ENSDARG00000045936	IPR001356, IPR001523, IPR009057	Homeobox_dom, Paired_dom, Homeodomain-like	pax6b
ENSDARG00000045951	IPR000953, IPR016197	Chromo/shadow_dom, Chromodomain-like	kat5b
ENSDARG00000045983	IPR007087, IPR013069, IPR015880	Znf_C2H2, BTB_POZ, Znf_C2H2-like	zbtb43
ENSDARG00000046006	IPR013921	Mediator_Med20	med20
ENSDARG00000046010	IPR002857	Znf_CXXC	kdm2bb
ENSDARG00000046019	IPR007087, IPR015880	Znf_C2H2, Znf_C2H2-like	snai1b
ENSDARG00000051729	IPR002909, IPR008366, IPR008967, IPR011539	IPT, NFAT, p53-like_TF_DNA-bd, RHD	nfatc3b
ENSDARG00000051798	IPR001965	Znf_PHD	brd1b
ENSDARG00000051926	IPR007087, IPR015880	Znf_C2H2, Znf_C2H2-like	plag1
ENSDARG00000051955	IPR013907	Sds3	brms1
ENSDARG00000052091	IPR002909, IPR008967, IPR015350, IPR015351	IPT, p53-like_TF_DNA-bd, Beta-trefoil_DNA-bd_dom, LAG1_DNA-bd	rbpjb
ENSDARG00000052115	IPR000418, IPR003118	Ets_dom, Pointed_dom	ehf
ENSDARG00000052131	IPR007087, IPR015880	Znf_C2H2, Znf_C2H2-like	gli3
ENSDARG00000052150	IPR001356, IPR005542, IPR009057	Homeobox_dom, PBX, Homeodomain-like	pbx4
ENSDARG00000052164	IPR007087, IPR015880	Znf_C2H2, Znf_C2H2-like	znf507
ENSDARG00000052165	IPR001356, IPR009057	Homeobox_dom, Homeodomain-like	si:ch211-236k19.2
ENSDARG00000052188	IPR000949, IPR007087, IPR015880	ELM2_dom, Znf_C2H2, Znf_C2H2-like	znf541
ENSDARG00000052242	IPR007797	TF_AF4/FMR2	aff2
ENSDARG00000052348	IPR000330, IPR001005, IPR009057, IPR015194, IPR015195	SNF2_N, SANT/Myb, Homeodomain-like, ISWI_HAND-dom, SLIDE	smarca5
ENSDARG00000052351	IPR007087, IPR015880	Znf_C2H2, Znf_C2H2-like	ZXDC
ENSDARG00000052387	IPR000327, IPR000972, IPR001356, IPR009057, IPR010982, IPR013847	POU_specific, TF_octamer, Homeobox_dom, Homeodomain-like, Lambda_DNA-bd_dom, POU	pou2f3
ENSDARG00000052402	IPR001525	C5_MeTfrase	dnmt3ba
ENSDARG00000052426	IPR013069	BTB_POZ	si:ch211-256e16.3
ENSDARG00000052511	IPR002059, IPR011129	CSP_DNA-bd, Cold_shock_prot	LIN28B
ENSDARG00000052610	IPR011598	bHLH_dom	olig4
ENSDARG00000052618	IPR001067, IPR011598	Nuc_translocat, bHLH_dom	ahrrb
ENSDARG00000052654	IPR000536, IPR001628, IPR001723, IPR001728, IPR008946	Nucl_hrmn_rcpt_lig-bd_core, Znf_hrmn_rcpt, Str_hrmn_rcpt, ThyrH_rcpt, Nucl_hormone_rcpt_ligand-bd	thrab
ENSDARG00000052695	IPR000536, IPR001628, IPR001723, IPR003068, IPR008946	Nucl_hrmn_rcpt_lig-bd_core, Znf_hrmn_rcpt, Str_hrmn_rcpt, COUP_TF, Nucl_hormone_rcpt_ligand-bd	nr2f1a
ENSDARG00000052787	IPR001594	Znf_DHHC_palmitoyltrfase	zdhhc12b
ENSDARG00000052826	IPR000040, IPR008967, IPR013524, IPR016554	AML1_Runt, p53-like_TF_DNA-bd, Runt_dom, TF_Runt-rel_RUNX	runx3
ENSDARG00000052827	IPR010666	Znf_GRF	top3a
ENSDARG00000052893	IPR001356, IPR003654, IPR009057	Homeobox_dom, OAR_dom, Homeodomain-like	rx3
ENSDARG00000052894	IPR007087, IPR015880	Znf_C2H2, Znf_C2H2-like	znf532
ENSDARG00000052910	IPR007087	Znf_C2H2	wnt8a
ENSDARG00000052978	IPR000571	Znf_CCCH	mbnl1
ENSDARG00000053097	IPR000232, IPR010542	HSF_DNA-bd, Vert_HSTF_C	hsf2
ENSDARG00000053129	IPR002059, IPR011129	CSP_DNA-bd, Cold_shock_prot	carhsp1
ENSDARG00000053165	IPR007087, IPR015880	Znf_C2H2, Znf_C2H2-like	zgc:113377
ENSDARG00000053201	IPR006821	Intermed_filament_DNA-bd	zgc:172323
ENSDARG00000053209	IPR001132, IPR003619, IPR008984, IPR013019	SMAD_dom_Dwarfin-type, MAD_homology1_Dwarfin-type, SMAD_FHA_domain, MAD_homology_MH1	smad6a
ENSDARG00000053248	IPR006821	Intermed_filament_DNA-bd	inab
ENSDARG00000053260	IPR007087, IPR015880	Znf_C2H2, Znf_C2H2-like	zgc:113090
ENSDARG00000053263	IPR007087, IPR015880	Znf_C2H2, Znf_C2H2-like	zgc:113372
ENSDARG00000053298	IPR001356, IPR009057	Homeobox_dom, Homeodomain-like	nkx2.2a
ENSDARG00000053301	IPR007087, IPR015880	Znf_C2H2, Znf_C2H2-like	insm1b
ENSDARG00000053364	IPR001356, IPR009057	Homeobox_dom, Homeodomain-like	pax10
ENSDARG00000053389	IPR001965	Znf_PHD	jade2
ENSDARG00000053446	IPR003173, IPR009044	PC4, ssDNA-bd_transcriptional_reg	sub1a
ENSDARG00000053499	IPR001356, IPR009057	Homeobox_dom, Homeodomain-like	isl2b
ENSDARG00000053569	IPR009071	HMG_box_dom	sox3
ENSDARG00000053583	IPR001356, IPR009057	Homeobox_dom, Homeodomain-like	cers6
ENSDARG00000053586	IPR001630, IPR004827	Leuzip_CREB, bZIP	creb1a
ENSDARG00000053650	IPR001766	TF_fork_head	foxb1b
ENSDARG00000053666	IPR001005, IPR009057	SANT/Myb, Homeodomain-like	myb
ENSDARG00000053695	IPR007087, IPR015880	Znf_C2H2, Znf_C2H2-like
ENSDARG00000053773	IPR011520	Vg_Tdu	vgll2b
ENSDARG00000053792	IPR007087, IPR015880	Znf_C2H2, Znf_C2H2-like	si:rp71-1g18.1
ENSDARG00000053800	IPR007087, IPR015880	Znf_C2H2, Znf_C2H2-like	si:ch211-276c2.4
ENSDARG00000053803	IPR013069	BTB_POZ	si:ch1073-201c17.1
ENSDARG00000053829	IPR001523, IPR009057	Paired_dom, Homeodomain-like	pax9
ENSDARG00000053864	IPR000949, IPR001005, IPR007087, IPR009057	ELM2_dom, SANT/Myb, Znf_C2H2, Homeodomain-like	elmsan1b
ENSDARG00000053868	IPR000418	Ets_dom	etv2
ENSDARG00000053876	IPR013069	BTB_POZ	klhl26
ENSDARG00000053918	IPR002100	TF_MADSbox	srfa
ENSDARG00000053990	IPR009071	HMG_box_dom	hmgb2b
ENSDARG00000054003	IPR000536, IPR001628, IPR001723, IPR003078, IPR008946	Nucl_hrmn_rcpt_lig-bd_core, Znf_hrmn_rcpt, Str_hrmn_rcpt, Retinoic_acid_rcpt, Nucl_hormone_rcpt_ligand-bd	rargb
ENSDARG00000054025	IPR001356, IPR001827, IPR009057	Homeobox_dom, Homeobox_Antennapedia_CS, Homeodomain-like	hoxb8b
ENSDARG00000054030	IPR001356, IPR001827, IPR009057	Homeobox_dom, Homeobox_Antennapedia_CS, Homeodomain-like	hoxb5b
ENSDARG00000054031	IPR011598	bHLH_dom	mxd4
ENSDARG00000054033	IPR001356, IPR009057	Homeobox_dom, Homeodomain-like	hoxb1b
ENSDARG00000054162	IPR002909, IPR008366, IPR008967, IPR011539	IPT, NFAT, p53-like_TF_DNA-bd, RHD	nfatc4
ENSDARG00000054259	IPR000182	GNAT_dom	nat10
ENSDARG00000054301	IPR013641	Chromatin_KTI12	kti12
ENSDARG00000054304	IPR001356, IPR009057	Homeobox_dom, Homeodomain-like	homeza
ENSDARG00000054307	IPR001606	ARID_dom	zgc:77151
ENSDARG00000054321	IPR006821	Intermed_filament_DNA-bd	ngs
ENSDARG00000054323	IPR000536, IPR001628, IPR001723, IPR003074, IPR003076, IPR008946	Nucl_hrmn_rcpt_lig-bd_core, Znf_hrmn_rcpt, Str_hrmn_rcpt, 1Cnucl_rcpt, 1Cnucl_rcpt_A, Nucl_hormone_rcpt_ligand-bd	pparab
ENSDARG00000054332	IPR001965	Znf_PHD	trim66
ENSDARG00000054442	IPR000953, IPR008251, IPR016197	Chromo/shadow_dom, Chromo_shadow_dom, Chromodomain-like	cbx1b
ENSDARG00000054458	IPR008984	SMAD_FHA_domain	slmapa
ENSDARG00000054509	IPR001356, IPR009057	Homeobox_dom, Homeodomain-like	hesx1
ENSDARG00000054560	IPR011598	bHLH_dom	her15.2
ENSDARG00000054562	IPR011598	bHLH_dom	her15.1
ENSDARG00000054574	IPR007529	Znf_HIT	znhit1
ENSDARG00000054632	IPR000418, IPR003118	Ets_dom, Pointed_dom	fli1a
ENSDARG00000054683	IPR001214, IPR007087, IPR015880	SET_dom, Znf_C2H2, Znf_C2H2-like	prdm8b
ENSDARG00000054778	IPR007087, IPR015880	Znf_C2H2, Znf_C2H2-like	pogza
ENSDARG00000054823	IPR011598	bHLH_dom	id3
ENSDARG00000054878	IPR001356, IPR009057	Homeobox_dom, Homeodomain-like	six2b
ENSDARG00000054879	IPR001356, IPR009057	Homeobox_dom, Homeodomain-like	six3b
ENSDARG00000054903	IPR000679, IPR000949, IPR001005, IPR001025, IPR009057	Znf_GATA, ELM2_dom, SANT/Myb, BAH_dom, Homeodomain-like	mta3
ENSDARG00000054957	IPR007087, IPR015880	Znf_C2H2, Znf_C2H2-like	zgc:113381
ENSDARG00000054984	IPR007087, IPR013069, IPR015880	Znf_C2H2, BTB_POZ, Znf_C2H2-like	zbtb41
ENSDARG00000055066	IPR001594	Znf_DHHC_palmitoyltrfase	zdhhc20a
ENSDARG00000055106	IPR007087, IPR015880	Znf_C2H2, Znf_C2H2-like	znf148
ENSDARG00000055151	IPR001214	SET_dom	smyd2a
ENSDARG00000055158	IPR009057	Homeodomain-like	prox1a
ENSDARG00000055162	IPR001356, IPR009057, IPR015880	Homeobox_dom, Homeodomain-like, Znf_C2H2-like	zhx2
ENSDARG00000055276	IPR000451, IPR002909, IPR008967, IPR011539	NFkB/Dor, IPT, p53-like_TF_DNA-bd, RHD	rel
ENSDARG00000055283	IPR011598	bHLH_dom	id2a
ENSDARG00000055294	IPR011598	bHLH_dom	atoh1a
ENSDARG00000055300	IPR013243	SCA7_dom	atxn7l2a
ENSDARG00000055349	IPR001356, IPR008422, IPR009057	Homeobox_dom, Homeobox_KN_domain, Homeodomain-like	pknox2
ENSDARG00000055359	IPR000770, IPR001965, IPR010919	SAND_dom, Znf_PHD, SAND_dom-like	si:dkey-68o6.2
ENSDARG00000055374	IPR001346, IPR008984	Interferon_reg_fact_DNA-bd_dom, SMAD_FHA_domain	irf4b
ENSDARG00000055395	IPR001766	TF_fork_head	foxq1b
ENSDARG00000055398	IPR001766	TF_fork_head	foxc1b
ENSDARG00000055429	IPR001965	Znf_PHD	kat6b
ENSDARG00000055481	IPR004827, IPR007087, IPR015880, IPR016378	bZIP, Znf_C2H2, Znf_C2H2-like, TF_CRE-BP1-typ	atf7b
ENSDARG00000055493	IPR007087, IPR013069, IPR015880	Znf_C2H2, BTB_POZ, Znf_C2H2-like	hic1
ENSDARG00000055574	IPR001766	TF_fork_head	FOXN2 (2 of 2)
ENSDARG00000055588	IPR008967, IPR013801, IPR015988	p53-like_TF_DNA-bd, STAT_TF_DNA-bd, STAT_TF_coiled-coil	stat5b
ENSDARG00000055610	IPR002909	IPT	exoc2
ENSDARG00000055630	IPR001766	TF_fork_head	foxh1
ENSDARG00000055690	IPR006612	Znf_C2CH	THAP6 (1 of 2)
ENSDARG00000055750	IPR001766	TF_fork_head	foxp3a
ENSDARG00000055751	IPR000837, IPR004827	AP-1, bZIP	fosb
ENSDARG00000055752	IPR011598	bHLH_dom	npas4a
ENSDARG00000055753	IPR000953, IPR001214, IPR003606, IPR003616, IPR007728, IPR011381, IPR016197	Chromo/shadow_dom, SET_dom, Pre-SET_Zn-bd_sub, Post-SET_dom, Pre-SET_dom, Histone_H3-K9_MeTrfase, Chromodomain-like	suv39h1b
ENSDARG00000055792	IPR001766	TF_fork_head	FOXO4
ENSDARG00000055798	IPR003650, IPR011598	Orange, bHLH_dom	heyl
ENSDARG00000055854	IPR000536, IPR001628, IPR001723, IPR003070, IPR003073, IPR008946	Nucl_hrmn_rcpt_lig-bd_core, Znf_hrmn_rcpt, Str_hrmn_rcpt, Nuc_orph_rcpt, NURR_rcpt, Nucl_hormone_rcpt_ligand-bd	nr4a3
ENSDARG00000055883	IPR010995	DNA_repair_Rad51/TF_NusA_a-hlx	dmc1
ENSDARG00000055926	IPR001766	TF_fork_head	foxi3a
ENSDARG00000055930	IPR000571	Znf_CCCH	zc3h7b
ENSDARG00000056012	IPR001356, IPR009057	Homeobox_dom, Homeodomain-like	eve1
ENSDARG00000056015	IPR001356, IPR009057	Homeobox_dom, Homeodomain-like	hoxb13a
ENSDARG00000056023	IPR001356, IPR009057, IPR017112	Homeobox_dom, Homeodomain-like, Homeobox_Hox9	hoxb9a
ENSDARG00000056027	IPR000047, IPR001356, IPR001827, IPR009057	HTH_motif, Homeobox_dom, Homeobox_Antennapedia_CS, Homeodomain-like	hoxb8a
ENSDARG00000056030	IPR001356, IPR001827, IPR009057	Homeobox_dom, Homeobox_Antennapedia_CS, Homeodomain-like	hoxb7a
ENSDARG00000056079	IPR004092, IPR006612	Mbt, Znf_C2CH	l3mbtl2
ENSDARG00000056127	IPR005576	RNA_pol_Rpb7_N	polr2gl
ENSDARG00000056130	IPR011598	bHLH_dom	neurog1
ENSDARG00000056175	IPR007087, IPR015880	Znf_C2H2, Znf_C2H2-like	scrt2
ENSDARG00000056213	IPR006612	Znf_C2CH	THAP6 (2 of 2)
ENSDARG00000056226	IPR004827	bZIP	creb3l3a
ENSDARG00000056268	IPR013243	SCA7_dom	atxn7l2b
ENSDARG00000056292	IPR001356, IPR009057	Homeobox_dom, Homeodomain-like	vsx1
ENSDARG00000056395	IPR001356, IPR003350, IPR009057, IPR010982	Homeobox_dom, CUT_dom, Homeodomain-like, Lambda_DNA-bd_dom	onecut3a
ENSDARG00000056400	IPR003650, IPR011598	Orange, bHLH_dom	helt
ENSDARG00000056407	IPR001346, IPR008984	Interferon_reg_fact_DNA-bd_dom, SMAD_FHA_domain	irf8
ENSDARG00000056438	IPR003650, IPR011598	Orange, bHLH_dom	her9
ENSDARG00000056483	IPR008116	SSDP_DNA-bd	ssbp4
ENSDARG00000056490	IPR008116	SSDP_DNA-bd	SSBP4 (2 of 2)
ENSDARG00000056491	IPR007087, IPR015880	Znf_C2H2, Znf_C2H2-like	ikzf5
ENSDARG00000056541	IPR000536, IPR001723, IPR008946	Nucl_hrmn_rcpt_lig-bd_core, Str_hrmn_rcpt, Nucl_hormone_rcpt_ligand-bd	nr0b1
ENSDARG00000056594	IPR001356, IPR003893, IPR008422, IPR009057	Homeobox_dom, Iroquois_homeo, Homeobox_KN_domain, Homeodomain-like	irx1b
ENSDARG00000056617	IPR000408	Reg_chr_condens	rpgra
ENSDARG00000056621	IPR007087, IPR015880	Znf_C2H2, Znf_C2H2-like	ctcf
ENSDARG00000056647	IPR013069	BTB_POZ	KLHL3
ENSDARG00000056666	IPR007087, IPR015880	Znf_C2H2, Znf_C2H2-like	sp8b
ENSDARG00000056679	IPR011124	Znf_CW	morc3a
ENSDARG00000056723	IPR008984	SMAD_FHA_domain	fhad1
ENSDARG00000056725	IPR009071	HMG_box_dom	hmgb3a
ENSDARG00000056729	IPR003650, IPR011598	Orange, bHLH_dom	her4.2
ENSDARG00000056732	IPR003650, IPR011598	Orange, bHLH_dom	her4.1
ENSDARG00000056780	IPR014876	DEK_C	ssh1a
ENSDARG00000056783	IPR000536, IPR001628, IPR001723, IPR003078, IPR008946	Nucl_hrmn_rcpt_lig-bd_core, Znf_hrmn_rcpt, Str_hrmn_rcpt, Retinoic_acid_rcpt, Nucl_hormone_rcpt_ligand-bd	raraa
ENSDARG00000056784	IPR000770, IPR001965, IPR008087, IPR010919	SAND_dom, Znf_PHD, AIRE, SAND_dom-like	aire
ENSDARG00000056793	IPR007087, IPR015880	Znf_C2H2, Znf_C2H2-like	jazf1b
ENSDARG00000056819	IPR001356, IPR009057, IPR017112	Homeobox_dom, Homeodomain-like, Homeobox_Hox9	hoxa9b
ENSDARG00000056847	IPR009057	Homeodomain-like	si:dkey-27c15.3
ENSDARG00000056979	IPR001356, IPR009057	Homeobox_dom, Homeodomain-like	lhx9
ENSDARG00000056995	IPR007087, IPR015880	Znf_C2H2, Znf_C2H2-like	snai1a
ENSDARG00000057074	IPR000408	Reg_chr_condens	rpgrb
ENSDARG00000057093	IPR001606, IPR001965, IPR004198, IPR013637	ARID_dom, Znf_PHD, Znf_C5HC2, Lys_sp_deMease_like_dom	kdm5ba
ENSDARG00000057231	IPR000536, IPR001628, IPR001723, IPR003079, IPR008946	Nucl_hrmn_rcpt_lig-bd_core, Znf_hrmn_rcpt, Str_hrmn_rcpt, ROR_rcpt, Nucl_hormone_rcpt_ligand-bd	rorca
ENSDARG00000057238	IPR007087, IPR015880	Znf_C2H2, Znf_C2H2-like	si:dkey-30k6.5
ENSDARG00000057249	IPR001965	Znf_PHD	zmynd11
ENSDARG00000057272	IPR009061	DNA-bd_dom_put	slc30a9
ENSDARG00000057321	IPR007087	Znf_C2H2	tut1
ENSDARG00000057323	IPR003316	E2F_WHTH_DNA-bd_dom	e2f8
ENSDARG00000057328	IPR000571	Znf_CCCH	cth1
ENSDARG00000057395	IPR008116	SSDP_DNA-bd	SSBP2 (1 of 2)
ENSDARG00000057439	IPR001965	Znf_PHD	phf1
ENSDARG00000057527	IPR002100	TF_MADSbox	MEF2A (2 of 2)
ENSDARG00000057562	IPR008806	RNA_pol_III_Rpc82_C	polr3c
ENSDARG00000057582	IPR013069	BTB_POZ	KLHL34
ENSDARG00000057586	IPR007087, IPR015880	Znf_C2H2, Znf_C2H2-like	sall3b
ENSDARG00000057649	IPR003350, IPR010982	CUT_dom, Lambda_DNA-bd_dom	satb1a
ENSDARG00000057652	IPR004827	bZIP	dbpb
ENSDARG00000057660	IPR000571	Znf_CCCH	dhx57
ENSDARG00000057671	IPR011598	bHLH_dom	epas1b
ENSDARG00000057680	IPR001766	TF_fork_head	foxj2
ENSDARG00000057681	IPR010507	Znf_MYM	si:ch211-266o15.1
ENSDARG00000057707	IPR007087, IPR015880	Znf_C2H2, Znf_C2H2-like	zgc:66443
ENSDARG00000057737	IPR000003, IPR000536, IPR001628, IPR001723, IPR008946	Retinoid-X_rcpt/HNF4, Nucl_hrmn_rcpt_lig-bd_core, Znf_hrmn_rcpt, Str_hrmn_rcpt, Nucl_hormone_rcpt_ligand-bd	rxraa
ENSDARG00000057738	IPR000330	SNF2_N	hells
ENSDARG00000057741	IPR000536, IPR001628, IPR001723, IPR001728, IPR008946	Nucl_hrmn_rcpt_lig-bd_core, Znf_hrmn_rcpt, Str_hrmn_rcpt, ThyrH_rcpt, Nucl_hormone_rcpt_ligand-bd	nr1h4
ENSDARG00000057751	IPR007087, IPR013069, IPR015880	Znf_C2H2, BTB_POZ, Znf_C2H2-like	zbtb47a
ENSDARG00000057782	IPR001739, IPR001965, IPR004022, IPR016177	Methyl_CpG_DNA-bd, Znf_PHD, DDT_dom, DNA-bd_dom	baz2ba
ENSDARG00000057830	IPR001525	C5_MeTfrase	dnmt3bb.2
ENSDARG00000057854	IPR010516, IPR017250	SAP18, Hist_deAcase_cplx_SAP18	sap18
ENSDARG00000057859	IPR001356, IPR009057	Homeobox_dom, Homeodomain-like	hoxd10a
ENSDARG00000057863	IPR001525	C5_MeTfrase	dnmt3bb.3
ENSDARG00000057890	IPR000571	Znf_CCCH	TTC31
ENSDARG00000057907	IPR001965	Znf_PHD	DIDO1 (1 of 2)
ENSDARG00000057936	IPR001356, IPR009057	Homeobox_dom, Homeodomain-like	lhx5
ENSDARG00000057940	IPR001965	Znf_PHD	dido1
ENSDARG00000057974	IPR000571	Znf_CCCH	parp12b
ENSDARG00000058004	IPR001356, IPR009057	Homeobox_dom, Homeodomain-like	six2a
ENSDARG00000058008	IPR001356, IPR009057	Homeobox_dom, Homeodomain-like	six3a
ENSDARG00000058011	IPR001356, IPR003654, IPR009057	Homeobox_dom, OAR_dom, Homeodomain-like	arxa
ENSDARG00000058039	IPR011598	bHLH_dom	bhlhe22
ENSDARG00000058050	IPR001214	SET_dom	smyd3
ENSDARG00000058133	IPR001766	TF_fork_head	foxd2
ENSDARG00000058154	IPR007087, IPR015880	Znf_C2H2, Znf_C2H2-like	znf385c
ENSDARG00000058178	IPR001594	Znf_DHHC_palmitoyltrfase	zdhhc20b
ENSDARG00000058237	IPR008116	SSDP_DNA-bd	ssbp3a
ENSDARG00000058243	IPR004018	RPEL_repeat	phactr3a
ENSDARG00000058322	IPR013069	BTB_POZ	enc3
ENSDARG00000058342	IPR007604	CP2	grhl2a
ENSDARG00000058349	IPR000268	RNAP_N/Rpb10	polr2l
ENSDARG00000058379	IPR000047, IPR001356, IPR003654, IPR009057	HTH_motif, Homeobox_dom, OAR_dom, Homeodomain-like	otpb
ENSDARG00000058448	IPR000571	Znf_CCCH	zrsr2
ENSDARG00000058562	IPR007087, IPR015880	Znf_C2H2, Znf_C2H2-like	zgc:123008
ENSDARG00000058566	IPR007087, IPR015880	Znf_C2H2, Znf_C2H2-like	si:dkey-253d23.5
ENSDARG00000058587	IPR001005, IPR009057	SANT/Myb, Homeodomain-like	ccdc79
ENSDARG00000058598	IPR009071	HMG_box_dom	sox18
ENSDARG00000058630	IPR001005, IPR009057	SANT/Myb, Homeodomain-like	BDP1 (1 of 2)
ENSDARG00000058656	IPR006821	Intermed_filament_DNA-bd	desma
ENSDARG00000058679	IPR007087, IPR015880	Znf_C2H2, Znf_C2H2-like	ZMAT1
ENSDARG00000058702	IPR000047, IPR001356, IPR009057	HTH_motif, Homeobox_dom, Homeodomain-like	vax2
ENSDARG00000058710	IPR001005, IPR009057	SANT/Myb, Homeodomain-like	terf1
ENSDARG00000058830	IPR001594	Znf_DHHC_palmitoyltrfase	zdhhc3b
ENSDARG00000058892	IPR008984	SMAD_FHA_domain	cep170ab
ENSDARG00000058924	IPR000327, IPR001356, IPR009057, IPR010982, IPR013847	POU_specific, Homeobox_dom, Homeodomain-like, Lambda_DNA-bd_dom, POU	pou1f1
ENSDARG00000058992	IPR001356, IPR009057	Homeobox_dom, Homeodomain-like	cers2b
ENSDARG00000058999	IPR000047, IPR001356, IPR009057	HTH_motif, Homeobox_dom, Homeodomain-like	cdx1b
ENSDARG00000059020	IPR006612	Znf_C2CH	thap1
ENSDARG00000059073	IPR001356, IPR009057	Homeobox_dom, Homeodomain-like	gsc
ENSDARG00000059109	IPR007087, IPR015880	Znf_C2H2, Znf_C2H2-like	si:dkeyp-113d7.1
ENSDARG00000059130	IPR000679, IPR016374	Znf_GATA, TF_GATA-2/3	gata1b
ENSDARG00000059226	IPR007087, IPR013069, IPR015880	Znf_C2H2, BTB_POZ, Znf_C2H2-like	zbtb8a
ENSDARG00000059233	IPR000040, IPR008967, IPR013524, IPR016554	AML1_Runt, p53-like_TF_DNA-bd, Runt_dom, TF_Runt-rel_RUNX	runx2b
ENSDARG00000059235	IPR007889	HTH_Psq	zgc:113274
ENSDARG00000059255	IPR001356, IPR009057	Homeobox_dom, Homeodomain-like	evx2
ENSDARG00000059256	IPR001356, IPR009057	Homeobox_dom, Homeodomain-like	hoxd13a
ENSDARG00000059263	IPR001356, IPR009057	Homeobox_dom, Homeodomain-like	hoxd12a
ENSDARG00000059267	IPR001356, IPR009057	Homeobox_dom, Homeodomain-like	hoxd11a
ENSDARG00000059274	IPR001356, IPR009057, IPR017112	Homeobox_dom, Homeodomain-like, Homeobox_Hox9	hoxd9a
ENSDARG00000059276	IPR001356, IPR001827, IPR009057	Homeobox_dom, Homeobox_Antennapedia_CS, Homeodomain-like	hoxd4a
ENSDARG00000059279	IPR008121, IPR013854	TF_AP2_alpha_N, TF_AP2_C	tfap2a
ENSDARG00000059280	IPR001356, IPR001827, IPR009057	Homeobox_dom, Homeobox_Antennapedia_CS, Homeodomain-like	hoxd3a
ENSDARG00000059327	IPR000679, IPR016374	Znf_GATA, TF_GATA-2/3	gata2a
ENSDARG00000059337	IPR001356, IPR008422, IPR009057	Homeobox_dom, Homeobox_KN_domain, Homeodomain-like	tgif1
ENSDARG00000059370	IPR000536, IPR001628, IPR001723, IPR003078, IPR008946	Nucl_hrmn_rcpt_lig-bd_core, Znf_hrmn_rcpt, Str_hrmn_rcpt, Retinoic_acid_rcpt, Nucl_hormone_rcpt_ligand-bd	nr1d4b
ENSDARG00000059474	IPR011598	bHLH_dom	mlxip
ENSDARG00000059483	IPR000818, IPR016361	TEA/ATTS, TEF_metazoa	tead1b
ENSDARG00000059567	IPR008984	SMAD_FHA_domain	si:ch73-281f12.4
ENSDARG00000059581	IPR001739, IPR016177	Methyl_CpG_DNA-bd, DNA-bd_dom	mbd5
ENSDARG00000059583	IPR000408	Reg_chr_condens	wbscr16
ENSDARG00000059653	IPR001965, IPR002857	Znf_PHD, Znf_CXXC	kdm2aa
ENSDARG00000059707	IPR007087, IPR015880	Znf_C2H2, Znf_C2H2-like	ZNF423
ENSDARG00000059751	IPR013069	BTB_POZ	ABTB2 (1 of 2)
ENSDARG00000059768	IPR007087	Znf_C2H2	gpatch8
ENSDARG00000059812	IPR013194	HDAC_interact	sin3ab
ENSDARG00000059836	IPR004827	bZIP	ddit3
ENSDARG00000059936	IPR000408	Reg_chr_condens	HERC4
ENSDARG00000059963	IPR006642	Znf_Rad18_put	polk
ENSDARG00000059983	IPR007087, IPR015880	Znf_C2H2, Znf_C2H2-like	zufsp
ENSDARG00000060016	IPR001214, IPR001965, IPR003616, IPR006560	SET_dom, Znf_PHD, Post-SET_dom, AWS_dom	nsd1a
ENSDARG00000060030	IPR001214, IPR003616	SET_dom, Post-SET_dom	setd1a
ENSDARG00000060054	IPR009607	Enhancer_polycomb_C	epc1b
ENSDARG00000060089	IPR000330	SNF2_N	btaf1
ENSDARG00000060109	IPR008984	SMAD_FHA_domain	aggf1
ENSDARG00000060113	IPR007087	Znf_C2H2	znf395a
ENSDARG00000060235	IPR002909	IPT	mst1ra
ENSDARG00000060306	IPR007604	CP2	tfcp2
ENSDARG00000060372	IPR002909	IPT	plxna2
ENSDARG00000060512	IPR013069	BTB_POZ	kbtbd3
ENSDARG00000060515	IPR001594	Znf_DHHC_palmitoyltrfase	zdhhc9
ENSDARG00000060521	IPR000571	Znf_CCCH	rbm27
ENSDARG00000060529	IPR000047, IPR001356, IPR009057	HTH_motif, Homeobox_dom, Homeodomain-like	nkx6.3
ENSDARG00000060645	IPR003000	Sirtuin	sirt7
ENSDARG00000060661	IPR007087, IPR015880	Znf_C2H2, Znf_C2H2-like	klf8
ENSDARG00000060679	IPR009057, IPR017366	Homeodomain-like, Hist_Lys-spec_deMease	kdm1a
ENSDARG00000060687	IPR000330, IPR000953, IPR016197	SNF2_N, Chromo/shadow_dom, Chromodomain-like	chd2
ENSDARG00000060695	IPR007087, IPR015880	Znf_C2H2, Znf_C2H2-like	znf346
ENSDARG00000060697	IPR001214, IPR001965, IPR002857, IPR003616, IPR003888, IPR003889	SET_dom, Znf_PHD, Znf_CXXC, Post-SET_dom, FYrich_N, FYrich_C	kmt2bb
ENSDARG00000060705	IPR001214, IPR001965, IPR003616, IPR006560	SET_dom, Znf_PHD, Post-SET_dom, AWS_dom	nsd1b
ENSDARG00000060808	IPR007087, IPR015880	Znf_C2H2, Znf_C2H2-like	mecom
ENSDARG00000060847	IPR001214, IPR003616	SET_dom, Post-SET_dom	setd1ba
ENSDARG00000060862	IPR013723	Ataxin-1_HBP1	atxn1b
ENSDARG00000060868	IPR004092	Mbt	mbtd1
ENSDARG00000060885	IPR007087, IPR015880	Znf_C2H2, Znf_C2H2-like	znf592
ENSDARG00000060900	IPR007087, IPR015880	Znf_C2H2, Znf_C2H2-like	znf362a
ENSDARG00000060925	IPR001606, IPR004198	ARID_dom, Znf_C5HC2	jarid2a
ENSDARG00000060937	IPR007087, IPR015880	Znf_C2H2, Znf_C2H2-like	adnp2a
ENSDARG00000060983	IPR001214	SET_dom	smyd4
ENSDARG00000061011	IPR004827	bZIP	hlfb
ENSDARG00000061013	IPR013069	BTB_POZ	ankfy1
ENSDARG00000061030	IPR007087, IPR015880	Znf_C2H2, Znf_C2H2-like	vezf1b
ENSDARG00000061093	IPR008984	SMAD_FHA_domain	phldb1a
ENSDARG00000061108	IPR000197, IPR009110, IPR010303	Znf_TAZ, Nuc_rcpt_coact, DUF902_CREBbp	ep300b
ENSDARG00000061110	IPR007087, IPR013069, IPR015880	Znf_C2H2, BTB_POZ, Znf_C2H2-like	zbtb44
ENSDARG00000061147	IPR007087, IPR015880	Znf_C2H2, Znf_C2H2-like	zfp64
ENSDARG00000061174	IPR007087, IPR015880	Znf_C2H2, Znf_C2H2-like	znf740b
ENSDARG00000061185	IPR000182	GNAT_dom	nat15
ENSDARG00000061187	IPR000953, IPR008251, IPR016197	Chromo/shadow_dom, Chromo_shadow_dom, Chromodomain-like	cbx5
ENSDARG00000061311	IPR007087, IPR015880	Znf_C2H2, Znf_C2H2-like	znf438
ENSDARG00000061352	IPR007087, IPR015880	Znf_C2H2, Znf_C2H2-like	bcl11aa
ENSDARG00000061368	IPR007087, IPR015880	Znf_C2H2, Znf_C2H2-like	klf13
ENSDARG00000061373	IPR007087, IPR015880	Znf_C2H2, Znf_C2H2-like	znf142
ENSDARG00000061391	IPR007604	CP2	grhl1
ENSDARG00000061414	IPR007087, IPR013069	Znf_C2H2, BTB_POZ	slx4
ENSDARG00000061419	IPR007087, IPR015880	Znf_C2H2, Znf_C2H2-like	zmat4b
ENSDARG00000061424	IPR007087, IPR015880	Znf_C2H2, Znf_C2H2-like	znf646p
ENSDARG00000061458	IPR001965	Znf_PHD	phf14
ENSDARG00000061504	IPR001965	Znf_PHD	kdm4c
ENSDARG00000061509	IPR001699, IPR008967	TF_T-box, p53-like_TF_DNA-bd	BX927282.1
ENSDARG00000061547	IPR004823	TAF_TATA-bd	zgc:153409
ENSDARG00000061548	IPR001766	TF_fork_head	si:ch211-145o7.3
ENSDARG00000061549	IPR001766	TF_fork_head	foxo1b
ENSDARG00000061687	IPR013723	Ataxin-1_HBP1	atxn1a
ENSDARG00000061718	IPR007087, IPR015880	Znf_C2H2, Znf_C2H2-like	znf704
ENSDARG00000061774	IPR001739, IPR016177	Methyl_CpG_DNA-bd, DNA-bd_dom	mbd3a
ENSDARG00000061786	IPR013069	BTB_POZ	klhl2
ENSDARG00000061802	IPR007282	NOT	cnot2
ENSDARG00000061817	IPR008984	SMAD_FHA_domain	kif1aa
ENSDARG00000061818	IPR001356, IPR009057	Homeobox_dom, Homeodomain-like	meox2b
ENSDARG00000061836	IPR000647, IPR003619	CTF/NFI, MAD_homology1_Dwarfin-type	nfixb
ENSDARG00000061841	IPR000571	Znf_CCCH	tiparp
ENSDARG00000061885	IPR001356, IPR003350, IPR009057, IPR010982	Homeobox_dom, CUT_dom, Homeodomain-like, Lambda_DNA-bd_dom	satb2
ENSDARG00000061974	IPR007604	CP2	grhl2b
ENSDARG00000061992	IPR013110	DOT1_dom_Pfam	dot1l
ENSDARG00000062000	IPR013069	BTB_POZ	abtb2b
ENSDARG00000062002	IPR001356, IPR007087, IPR009057, IPR015880	Homeobox_dom, Znf_C2H2, Homeodomain-like, Znf_C2H2-like	adnpa
ENSDARG00000062024	IPR008984	SMAD_FHA_domain	kif1ab
ENSDARG00000062060	IPR000770, IPR010919	SAND_dom, SAND_dom-like	gmeb1
ENSDARG00000062106	IPR007087, IPR015880	Znf_C2H2, Znf_C2H2-like	klf5b
ENSDARG00000062122	IPR013069	BTB_POZ	klhl5
ENSDARG00000062165	IPR000007	Tubby_C	TUB
ENSDARG00000062187	IPR008984	SMAD_FHA_domain	kif14
ENSDARG00000062231	IPR007087, IPR015880	Znf_C2H2, Znf_C2H2-like	znf362b
ENSDARG00000062244	IPR001214, IPR003616, IPR006560	SET_dom, Post-SET_dom, AWS_dom	setd2
ENSDARG00000062268	IPR001606, IPR004198	ARID_dom, Znf_C5HC2	jarid2b
ENSDARG00000062269	IPR006642	Znf_Rad18_put	fan1
ENSDARG00000062302	IPR007087, IPR015880	Znf_C2H2, Znf_C2H2-like	znf652
ENSDARG00000062326	IPR000079	HMGN_fam	zgc:158409
ENSDARG00000062338	IPR007087, IPR015880	Znf_C2H2, Znf_C2H2-like	zeb2a
ENSDARG00000062374	IPR000571	Znf_CCCH	leng9
ENSDARG00000062401	IPR007087, IPR015880	Znf_C2H2, Znf_C2H2-like	znf319
ENSDARG00000062420	IPR000647, IPR003619	CTF/NFI, MAD_homology1_Dwarfin-type	nfia
ENSDARG00000062445	IPR004181	Znf_MIZ	pias1b
ENSDARG00000062448	IPR009061, IPR010919	DNA-bd_dom_put, SAND_dom-like	skor1b
ENSDARG00000062463	IPR000571	Znf_CCCH	zc3h12b
ENSDARG00000062472	IPR013194	HDAC_interact	sin3b
ENSDARG00000062506	IPR000571	Znf_CCCH	zc3h18
ENSDARG00000062510	IPR007087, IPR015880	Znf_C2H2, Znf_C2H2-like	bcl11ba
ENSDARG00000062550	IPR000571	Znf_CCCH	rc3h1
ENSDARG00000062553	IPR002112, IPR004826, IPR004827, IPR008917, IPR013069	Leuzip_Jun, bZIP_Maf, bZIP, TF_DNA-bd, BTB_POZ	bach1a
ENSDARG00000062621	IPR001356, IPR003350, IPR009057, IPR010982	Homeobox_dom, CUT_dom, Homeodomain-like, Lambda_DNA-bd_dom	SATB1
ENSDARG00000062634	IPR000182, IPR009464, IPR016376	GNAT_dom, PCAF_N, Hist_acetylase_PCAF	kat2b
ENSDARG00000062749	IPR007529	Znf_HIT	ino80b
ENSDARG00000062765	IPR001214, IPR001965, IPR003616, IPR006560	SET_dom, Znf_PHD, Post-SET_dom, AWS_dom	whsc1l1
ENSDARG00000062801	IPR000418	Ets_dom	erfl3
ENSDARG00000062824	IPR001356, IPR003654, IPR009057	Homeobox_dom, OAR_dom, Homeodomain-like	alx1
ENSDARG00000062868	IPR007087	Znf_C2H2	eea1
ENSDARG00000062892	IPR001766	TF_fork_head	foxe3
ENSDARG00000062893	IPR003000	Sirtuin	si:dkey-103i16.6
ENSDARG00000062902	IPR000007	Tubby_C	TULP2
ENSDARG00000062915	IPR007120, IPR007121, IPR007641, IPR007642, IPR007644, IPR007645, IPR007646, IPR007647	DNA-dir_RNA_pol_su2_6, RNA_pol_bsu_CS, RNA_pol_Rpb2_7, RNA_pol_Rpb2_2, RNA_pol_bsu_protrusion, RNA_pol_Rpb2_3, RNA_pol_Rpb2_4, RNA_pol_Rpb2_5	polr3b
ENSDARG00000062962	IPR001214, IPR001965, IPR002857, IPR003616, IPR003888, IPR003889	SET_dom, Znf_PHD, Znf_CXXC, Post-SET_dom, FYrich_N, FYrich_C	kmt2ba
ENSDARG00000063014	IPR004827	bZIP	dbpa
ENSDARG00000063031	IPR000330	SNF2_N	rad54l2
ENSDARG00000063040	IPR013069	BTB_POZ	btbd11b
ENSDARG00000063050	IPR000571	Znf_CCCH	rc3h2
ENSDARG00000063056	IPR000007	Tubby_C	tulp4b
ENSDARG00000063145	IPR009071	HMG_box_dom	tfam
ENSDARG00000063153	IPR007087, IPR015880	Znf_C2H2, Znf_C2H2-like	bcl11ab
ENSDARG00000063182	IPR000571	Znf_CCCH	RC3H1 (2 of 2)
ENSDARG00000063233	IPR001965	Znf_PHD	BAZ1A (1 of 2)
ENSDARG00000063255	IPR013069	BTB_POZ	btbd11a
ENSDARG00000063258	IPR003150	DNA-bd_RFX	rfx5
ENSDARG00000063354	IPR013069	BTB_POZ	ABTB1
ENSDARG00000063417	IPR000418	Ets_dom	erf
ENSDARG00000063438	IPR011598	bHLH_dom	srebf2
ENSDARG00000063535	IPR000330, IPR000953, IPR001965, IPR012957, IPR012958, IPR016197	SNF2_N, Chromo/shadow_dom, Znf_PHD, CHD_C2, CHD_N, Chromodomain-like	chd4a
ENSDARG00000063553	IPR007087, IPR015880	Znf_C2H2, Znf_C2H2-like	rlf
ENSDARG00000063555	IPR007087, IPR015880	Znf_C2H2, Znf_C2H2-like	MAZ (1 of 2)
ENSDARG00000063563	IPR004827	bZIP	creb3l2
ENSDARG00000063577	IPR013069	BTB_POZ	klhl35
ENSDARG00000063614	IPR009061, IPR010919	DNA-bd_dom_put, SAND_dom-like	SKOR2
ENSDARG00000063649	IPR000818, IPR016361	TEA/ATTS, TEF_metazoa	tead3b
ENSDARG00000063670	IPR004855	TFIIA_asu/bsu	gtf2a1l
ENSDARG00000063672	IPR000007	Tubby_C	TULP3
ENSDARG00000063701	IPR007087, IPR015880	Znf_C2H2, Znf_C2H2-like	rreb1a
ENSDARG00000063718	IPR008895	YL1	vps72
ENSDARG00000067544	IPR011598	bHLH_dom	tcf15
ENSDARG00000067560	IPR004600	TFIIH_Tfb4/p34	gtf2h3
ENSDARG00000067566	IPR007087	Znf_C2H2	sftpbb
ENSDARG00000067607	IPR011598	bHLH_dom	srebf1
ENSDARG00000067656	IPR007087, IPR015880	Znf_C2H2, Znf_C2H2-like	kcmf1
ENSDARG00000067658	IPR009057	Homeodomain-like	BX470189.1
ENSDARG00000067669	IPR000679	Znf_GATA	zglp1
ENSDARG00000067673	IPR001005, IPR009057	SANT/Myb, Homeodomain-like	snapc4
ENSDARG00000067727	IPR007087, IPR015880	Znf_C2H2, Znf_C2H2-like	BCL11B (2 of 2)
ENSDARG00000067729	IPR001606	ARID_dom	arid3c
ENSDARG00000067751	IPR013069	BTB_POZ	si:rp71-68n21.9
ENSDARG00000067797	IPR000418	Ets_dom	spi1a
ENSDARG00000067850	IPR002112, IPR004827, IPR008917	Leuzip_Jun, bZIP, TF_DNA-bd	jund
ENSDARG00000067976	IPR000536, IPR001103, IPR001628, IPR001723, IPR008946	Nucl_hrmn_rcpt_lig-bd_core, Andrgn_rcpt, Znf_hrmn_rcpt, Str_hrmn_rcpt, Nucl_hormone_rcpt_ligand-bd	ar
ENSDARG00000068064	IPR003000	Sirtuin	sirt1
ENSDARG00000068096	IPR004827	bZIP	atf5a
ENSDARG00000068157	IPR001214, IPR003606, IPR007728	SET_dom, Pre-SET_Zn-bd_sub, Pre-SET_dom	ehmt1a
ENSDARG00000068168	IPR011598	bHLH_dom	hes2.2
ENSDARG00000068175	IPR001965	Znf_PHD	ing5b
ENSDARG00000068192	IPR003894, IPR007900	TAFH_NHR1, TAF4	taf4a
ENSDARG00000068194	IPR007087, IPR015880	Znf_C2H2, Znf_C2H2-like	klf9
ENSDARG00000068365	IPR001356, IPR009057	Homeobox_dom, Homeodomain-like	lmx1bb
ENSDARG00000068366	IPR007087, IPR015880	Znf_C2H2, Znf_C2H2-like	wu:fc19g04
ENSDARG00000068380	IPR001766	TF_fork_head	foxg1c
ENSDARG00000068400	IPR007087, IPR013069, IPR015880	Znf_C2H2, BTB_POZ, Znf_C2H2-like	znf131
ENSDARG00000068406	IPR001356, IPR009057	Homeobox_dom, Homeodomain-like	six5
ENSDARG00000068407	IPR001356, IPR009057	Homeobox_dom, Homeodomain-like	six9
ENSDARG00000068417	IPR001766	TF_fork_head	FOXL2
ENSDARG00000068428	IPR000837, IPR004827	AP-1, bZIP	si:ch211-153j24.3
ENSDARG00000068580	IPR007087, IPR015880	Znf_C2H2, Znf_C2H2-like	glis1a
ENSDARG00000068590	IPR000182	GNAT_dom	NAT6
ENSDARG00000068601	IPR007087, IPR015880	Znf_C2H2, Znf_C2H2-like	atmin
ENSDARG00000068640	IPR001965	Znf_PHD	rsf1b.1
ENSDARG00000068761	IPR011598	bHLH_dom	mespab
ENSDARG00000068888	IPR013069	BTB_POZ	klhl41a
ENSDARG00000068893	IPR002052	DNA_methylase_N6_adenine_CS	mettl5
ENSDARG00000068976	IPR001356, IPR009057	Homeobox_dom, Homeodomain-like	bsx
ENSDARG00000068983	IPR013069	BTB_POZ	btbd9
ENSDARG00000069006	IPR009146	Groucho_enhance	tle3b
ENSDARG00000069030	IPR009061, IPR010919	DNA-bd_dom_put, SAND_dom-like	skor1a
ENSDARG00000069111	IPR007087, IPR015880	Znf_C2H2, Znf_C2H2-like	IKZF2
ENSDARG00000069196	IPR002909	IPT	ebf1b
ENSDARG00000069252	IPR001356, IPR009057	Homeobox_dom, Homeodomain-like	mixl1
ENSDARG00000069266	IPR000536, IPR001628, IPR001723, IPR008946	Nucl_hrmn_rcpt_lig-bd_core, Znf_hrmn_rcpt, Str_hrmn_rcpt, Nucl_hormone_rcpt_ligand-bd	esrra
ENSDARG00000069271	IPR013069	BTB_POZ	kbtbd4
ENSDARG00000069289	IPR000418, IPR003118, IPR016312	Ets_dom, Pointed_dom, TF_GA-bd_asu	gabpa
ENSDARG00000069295	IPR007087, IPR013069, IPR015880	Znf_C2H2, BTB_POZ, Znf_C2H2-like	bcl6ab
ENSDARG00000069327	IPR001356, IPR009057	Homeobox_dom, Homeodomain-like	nkx3.3
ENSDARG00000069329	IPR001356, IPR003654, IPR009057	Homeobox_dom, OAR_dom, Homeodomain-like	drgx
ENSDARG00000069335	IPR007087, IPR013069, IPR015880	Znf_C2H2, BTB_POZ, Znf_C2H2-like	BCL6B
ENSDARG00000069342	IPR007087, IPR015880	Znf_C2H2, Znf_C2H2-like	zgc:153115
ENSDARG00000069373	IPR006590	RNA_pol_II_Rpb4_core	crcp
ENSDARG00000069382	IPR001356, IPR009057	Homeobox_dom, Homeodomain-like	mxtx1
ENSDARG00000069420	IPR007087	Znf_C2H2	trim23
ENSDARG00000069440	IPR009061	DNA-bd_dom_put	dachd
ENSDARG00000069552	IPR011598	bHLH_dom	atoh7
ENSDARG00000069594	IPR008984	SMAD_FHA_domain	kif13a
ENSDARG00000069675	IPR003650, IPR011598	Orange, bHLH_dom	her8.2
ENSDARG00000069715	IPR001766	TF_fork_head	foxi2
ENSDARG00000069726	IPR007087, IPR015880	Znf_C2H2, Znf_C2H2-like	glis3
ENSDARG00000069737	IPR000327, IPR001356, IPR009057, IPR010982, IPR013847	POU_specific, Homeobox_dom, Homeodomain-like, Lambda_DNA-bd_dom, POU	pou4f2
ENSDARG00000069763	IPR000418, IPR006715	Ets_dom, ETS_PEA3_N	etv5a
ENSDARG00000069796	IPR003656, IPR007087, IPR015880	Znf_BED, Znf_C2H2, Znf_C2H2-like	zgc:173573
ENSDARG00000069807	IPR001594	Znf_DHHC_palmitoyltrfase	zdhhc18a
ENSDARG00000069866	IPR009071	HMG_box_dom	sox1a
ENSDARG00000069869	IPR007087, IPR015880	Znf_C2H2, Znf_C2H2-like	zgc:113030
ENSDARG00000069912	IPR000116, IPR000637	HMGI/HMGY, HMGI/Y_DNA-bd_CS	hmga2
ENSDARG00000069957	IPR007087, IPR015880	Znf_C2H2, Znf_C2H2-like	zgc:162936
ENSDARG00000069988	IPR001606	ARID_dom	arid5b
ENSDARG00000069989	IPR007087, IPR015880	Znf_C2H2, Znf_C2H2-like	bnc2
ENSDARG00000070013	IPR001275	DM_DNA-bd	dmrt2b
ENSDARG00000070048	IPR007087, IPR015880	Znf_C2H2, Znf_C2H2-like	zgc:173548
ENSDARG00000070053	IPR001766	TF_fork_head	foxg1d
ENSDARG00000070059	IPR006612	Znf_C2CH	si:ch211-262i1.5
ENSDARG00000070069	IPR001356, IPR003654, IPR009057, IPR016233	Homeobox_dom, OAR_dom, Homeodomain-like, Homeobox_Pitx/unc30	pitx3
ENSDARG00000070084	IPR001965	Znf_PHD	phf10
ENSDARG00000070098	IPR007889, IPR009057	HTH_Psq, Homeodomain-like	C1H10orf12
ENSDARG00000070107	IPR001356, IPR009057	Homeobox_dom, Homeodomain-like	six7
ENSDARG00000070108	IPR014876	DEK_C	dek
ENSDARG00000070127	IPR000967	Znf_NFX1	nfxl1
ENSDARG00000070151	IPR003958	CBFA_NFYB_domain	nfyc
ENSDARG00000070220	IPR000327, IPR001356, IPR009057, IPR010982, IPR013847, IPR016362	POU_specific, Homeobox_dom, Homeodomain-like, Lambda_DNA-bd_dom, POU, TF_POU_3	pou3f2a
ENSDARG00000070274	IPR006612	Znf_C2CH	CR407594.1
ENSDARG00000070285	IPR004823	TAF_TATA-bd	si:ch73-36p18.4
ENSDARG00000070337	IPR001356, IPR009057	Homeobox_dom, Homeodomain-like	hoxc1a
ENSDARG00000070338	IPR001356, IPR001827, IPR009057	Homeobox_dom, Homeobox_Antennapedia_CS, Homeodomain-like	hoxc4a
ENSDARG00000070339	IPR001356, IPR009057	Homeobox_dom, Homeodomain-like	hoxc3a
ENSDARG00000070340	IPR001356, IPR001827, IPR009057	Homeobox_dom, Homeobox_Antennapedia_CS, Homeodomain-like	hoxc5a
ENSDARG00000070343	IPR001356, IPR001827, IPR009057	Homeobox_dom, Homeobox_Antennapedia_CS, Homeodomain-like	hoxc6a
ENSDARG00000070346	IPR001356, IPR001827, IPR009057	Homeobox_dom, Homeobox_Antennapedia_CS, Homeodomain-like	hoxc8a
ENSDARG00000070348	IPR001356, IPR009057	Homeobox_dom, Homeodomain-like	hoxc10a
ENSDARG00000070351	IPR001356, IPR009057	Homeobox_dom, Homeodomain-like	hoxc11a
ENSDARG00000070352	IPR001356, IPR009057	Homeobox_dom, Homeodomain-like	hoxc12a
ENSDARG00000070353	IPR001356, IPR009057	Homeobox_dom, Homeodomain-like	hoxc13a
ENSDARG00000070371	IPR002515	Znf_C2HC	kat7a
ENSDARG00000070389	IPR001766	TF_fork_head	foxf2b
ENSDARG00000070390	IPR006612	Znf_C2CH	flad1
ENSDARG00000070428	IPR001132, IPR003619, IPR008984, IPR013019	SMAD_dom_Dwarfin-type, MAD_homology1_Dwarfin-type, SMAD_FHA_domain, MAD_homology_MH1	si:dkey-239n17.4
ENSDARG00000070432	IPR000330	SNF2_N	ino80
ENSDARG00000070441	IPR001594	Znf_DHHC_palmitoyltrfase	zdhhc17
ENSDARG00000070458	IPR006612	Znf_C2CH	zgc:153292
ENSDARG00000070463	IPR003316	E2F_WHTH_DNA-bd_dom	e2f3
ENSDARG00000070465	IPR003656	Znf_BED	si:dkey-13n23.3
ENSDARG00000070477	IPR001005, IPR009057	SANT/Myb, Homeodomain-like	dnajc2
ENSDARG00000070513	IPR001965	Znf_PHD	brpf3a
ENSDARG00000070536	IPR004827, IPR007087, IPR016378	bZIP, Znf_C2H2, TF_CRE-BP1-typ	creb5b
ENSDARG00000070538	IPR003650, IPR011598	Orange, bHLH_dom	hey1
ENSDARG00000070542	IPR004826, IPR004827, IPR008917	bZIP_Maf, bZIP, TF_DNA-bd	mafbb
ENSDARG00000070546	IPR011598	bHLH_dom	msgn1
ENSDARG00000070658	IPR007087, IPR013069, IPR015880	Znf_C2H2, BTB_POZ, Znf_C2H2-like	zbtb12.2
ENSDARG00000070677	IPR007087, IPR015880	Znf_C2H2, Znf_C2H2-like	fezf2
ENSDARG00000070698	IPR013069	BTB_POZ	kbtbd8
ENSDARG00000070704	IPR006612	Znf_C2CH	thap7
ENSDARG00000070721	IPR000324, IPR000536, IPR001628, IPR001723, IPR008946	VitD_rcpt, Nucl_hrmn_rcpt_lig-bd_core, Znf_hrmn_rcpt, Str_hrmn_rcpt, Nucl_hormone_rcpt_ligand-bd	vdrb
ENSDARG00000070769	IPR001766	TF_fork_head	foxg1a
ENSDARG00000070770	IPR003650, IPR011598	Orange, bHLH_dom	her4.3
ENSDARG00000070786	IPR007087, IPR015880	Znf_C2H2, Znf_C2H2-like	znf770
ENSDARG00000070809	IPR007087, IPR015880	Znf_C2H2, Znf_C2H2-like	znf516
ENSDARG00000070818	IPR001356, IPR001523, IPR009057	Homeobox_dom, Paired_dom, Homeodomain-like	pax7b
ENSDARG00000070834	IPR003195	TFIID-18	taf13
ENSDARG00000070843	IPR001606	ARID_dom	ARID3A
ENSDARG00000070845	IPR006612	Znf_C2CH	si:dkey-56d12.4
ENSDARG00000070864	IPR007087, IPR013069, IPR015880	Znf_C2H2, BTB_POZ, Znf_C2H2-like	bcl6a
ENSDARG00000070903	IPR002909	IPT	met
ENSDARG00000070913	IPR009071	HMG_box_dom	sox2
ENSDARG00000070929	IPR009071	HMG_box_dom	sox14
ENSDARG00000070939	IPR007087, IPR015880	Znf_C2H2, Znf_C2H2-like	znf740a
ENSDARG00000070951	IPR000116	HMGI/HMGY	hmga1b
ENSDARG00000070954	IPR001356, IPR009057	Homeobox_dom, Homeodomain-like	hmx2
ENSDARG00000070955	IPR001356, IPR009057	Homeobox_dom, Homeodomain-like	hmx3a
ENSDARG00000070981	IPR001025, IPR001214, IPR001965, IPR003616, IPR006560	BAH_dom, SET_dom, Znf_PHD, Post-SET_dom, AWS_dom	ash1l
ENSDARG00000070986	IPR000408	Reg_chr_condens	sergef
ENSDARG00000071051	IPR000953, IPR016197	Chromo/shadow_dom, Chromodomain-like	cbx6a
ENSDARG00000071055	IPR007087, IPR015880	Znf_C2H2, Znf_C2H2-like	ZNF512B
ENSDARG00000071060	IPR000182	GNAT_dom	naa10
ENSDARG00000071074	IPR000408	Reg_chr_condens	rccd1
ENSDARG00000071097	IPR007087, IPR015880	Znf_C2H2, Znf_C2H2-like	si:ch73-367f21.4
ENSDARG00000071150	IPR009071	HMG_box_dom	cica
ENSDARG00000071394	IPR001766	TF_fork_head	foxq2
ENSDARG00000071398	IPR004827	bZIP	si:dkey-172o19.2
ENSDARG00000071413	IPR000949, IPR001005, IPR009057	ELM2_dom, SANT/Myb, Homeodomain-like	mier2
ENSDARG00000071418	IPR001356, IPR009057	Homeobox_dom, Homeodomain-like	gbx1
ENSDARG00000071425	IPR000182	GNAT_dom	nat9
ENSDARG00000071463	IPR007087	Znf_C2H2	zgc:154125
ENSDARG00000071467	IPR007087, IPR013069, IPR015880	Znf_C2H2, BTB_POZ, Znf_C2H2-like	zbtb33
ENSDARG00000071469	IPR007087, IPR015880	Znf_C2H2, Znf_C2H2-like	ZNF618
ENSDARG00000071496	IPR007087, IPR015880	Znf_C2H2, Znf_C2H2-like	zic6
ENSDARG00000071497	IPR007087, IPR015880	Znf_C2H2, Znf_C2H2-like	zic3
ENSDARG00000071560	IPR000047, IPR001356, IPR009057	HTH_motif, Homeobox_dom, Homeodomain-like	dlx4b
ENSDARG00000071565	IPR000003, IPR000536, IPR001628, IPR001723, IPR008946	Retinoid-X_rcpt/HNF4, Nucl_hrmn_rcpt_lig-bd_core, Znf_hrmn_rcpt, Str_hrmn_rcpt, Nucl_hormone_rcpt_ligand-bd	hnf4g
ENSDARG00000071581	IPR007087, IPR015880	Znf_C2H2, Znf_C2H2-like	si:ch211-222k6.1
ENSDARG00000071583	IPR007087, IPR015880	Znf_C2H2, Znf_C2H2-like	gtf3ab
ENSDARG00000071589	IPR007087, IPR015880	Znf_C2H2, Znf_C2H2-like	si:dkey-253d23.2
ENSDARG00000071669	IPR001214	SET_dom	smyd5
ENSDARG00000071683	IPR007087, IPR015880	Znf_C2H2, Znf_C2H2-like	zfr2
ENSDARG00000071684	IPR001356, IPR003654, IPR009057	Homeobox_dom, OAR_dom, Homeodomain-like	rx1
ENSDARG00000071714	IPR003656, IPR007087, IPR015880	Znf_BED, Znf_C2H2, Znf_C2H2-like	si:dkey-20i20.5
ENSDARG00000071719	IPR007087, IPR015880	Znf_C2H2, Znf_C2H2-like	si:dkey-20i20.2
ENSDARG00000071725	IPR007087, IPR015880	Znf_C2H2, Znf_C2H2-like	zgc:174919
ENSDARG00000071733	IPR004210, IPR006578	BESS_motif, MADF-dom	si:ch211-207i20.3
ENSDARG00000071741	IPR007087, IPR015880	Znf_C2H2, Znf_C2H2-like	zgc:112977
ENSDARG00000071790	IPR007087, IPR015880	Znf_C2H2, Znf_C2H2-like	zgc:171318
ENSDARG00000071819	IPR007087, IPR015880	Znf_C2H2, Znf_C2H2-like	si:dkey-4c15.15
ENSDARG00000071833	IPR007087, IPR015880	Znf_C2H2, Znf_C2H2-like	zgc:113418
ENSDARG00000071868	IPR006794, IPR007087, IPR015880	Transcrp_activ_Zfx/Zfy-dom, Znf_C2H2, Znf_C2H2-like	znf711
ENSDARG00000071872	IPR001594	Znf_DHHC_palmitoyltrfase	zdhhc15b
ENSDARG00000073708	IPR007087, IPR015880	Znf_C2H2, Znf_C2H2-like	zgc:171551
ENSDARG00000073721	IPR000330	SNF2_N	smarcad1b
ENSDARG00000073726	IPR007087, IPR013069, IPR015880	Znf_C2H2, BTB_POZ, Znf_C2H2-like	zbtb32
ENSDARG00000073737	IPR013907	Sds3	suds3
ENSDARG00000073814	IPR001523, IPR009057	Paired_dom, Homeodomain-like	pax1b
ENSDARG00000073821	IPR007087, IPR015880	Znf_C2H2, Znf_C2H2-like	zgc:113397
ENSDARG00000073841	IPR000408	Reg_chr_condens	herc2
ENSDARG00000073850	IPR000286	His_deacetylse	hdac7b
ENSDARG00000073856	IPR007087, IPR015880	Znf_C2H2, Znf_C2H2-like	ZNF319 (2 of 2)
ENSDARG00000073857	IPR007087, IPR015880	Znf_C2H2, Znf_C2H2-like	klf7a
ENSDARG00000073859	IPR008984	SMAD_FHA_domain	kif13bb
ENSDARG00000073915	IPR007087, IPR015880	Znf_C2H2, Znf_C2H2-like	zgc:174654
ENSDARG00000073944	IPR001356, IPR007087, IPR009057, IPR015880	Homeobox_dom, Znf_C2H2, Homeodomain-like, Znf_C2H2-like
ENSDARG00000073957	IPR009071	HMG_box_dom	tox3
ENSDARG00000073988	IPR011598	bHLH_dom	mntb
ENSDARG00000074009	IPR007087, IPR015880	Znf_C2H2, Znf_C2H2-like	wu:fb11h05
ENSDARG00000074030	IPR002515, IPR013681	Znf_C2HC, Myelin_TF	myt1a
ENSDARG00000074052	IPR000408	Reg_chr_condens	si:ch211-281g13.5
ENSDARG00000074070	IPR001356, IPR003893, IPR008422, IPR009057	Homeobox_dom, Iroquois_homeo, Homeobox_KN_domain, Homeodomain-like	irx5b
ENSDARG00000074125	IPR007087, IPR015880	Znf_C2H2, Znf_C2H2-like	si:dkey-4c15.5
ENSDARG00000074136	IPR000408	Reg_chr_condens	zgc:163136
ENSDARG00000074146	IPR007087, IPR015880	Znf_C2H2, Znf_C2H2-like	zgc:113452
ENSDARG00000074148	IPR002909, IPR008967, IPR015350, IPR015351	IPT, p53-like_TF_DNA-bd, Beta-trefoil_DNA-bd_dom, LAG1_DNA-bd	rbpjl
ENSDARG00000074193	IPR007087, IPR015880	Znf_C2H2, Znf_C2H2-like	si:dkeyp-85d8.5
ENSDARG00000074238	IPR001965	Znf_PHD	brpf3b
ENSDARG00000074265	IPR007087, IPR015880	Znf_C2H2, Znf_C2H2-like	dzip1l
ENSDARG00000074270	IPR007087, IPR015880	Znf_C2H2, Znf_C2H2-like	ZNF518A
ENSDARG00000074274	IPR000783, IPR005571	RNA_pol_subH/Rpb5_C, RNA_pol_Rpb5_N	POLR2E (2 of 2)
ENSDARG00000074293	IPR001356, IPR007087, IPR009057, IPR015880	Homeobox_dom, Znf_C2H2, Homeodomain-like, Znf_C2H2-like	adnpb
ENSDARG00000074298	IPR007087, IPR015880	Znf_C2H2, Znf_C2H2-like	ZFP28 (3 of 19)
ENSDARG00000074303	IPR001965, IPR008984	Znf_PHD, SMAD_FHA_domain	phf12a
ENSDARG00000074319	IPR007087, IPR015880	Znf_C2H2, Znf_C2H2-like	sall1a
ENSDARG00000074321	IPR000818, IPR016361	TEA/ATTS, TEF_metazoa	tead3a
ENSDARG00000074337	IPR003894, IPR013289	TAFH_NHR1, ETO	cbfa2t2
ENSDARG00000074346	IPR002515, IPR004092	Znf_C2HC, Mbt	l3mbtl1b
ENSDARG00000074365	IPR007087, IPR015880	Znf_C2H2, Znf_C2H2-like	zgc:171901
ENSDARG00000074378	IPR002112, IPR004827, IPR008917	Leuzip_Jun, bZIP, TF_DNA-bd	junba
ENSDARG00000074415	IPR007087, IPR015880	Znf_C2H2, Znf_C2H2-like	zgc:171482
ENSDARG00000074424	IPR000408, IPR013069	Reg_chr_condens, BTB_POZ	ibtk
ENSDARG00000074442	IPR001356, IPR003654, IPR009057	Homeobox_dom, OAR_dom, Homeodomain-like	alx4b
ENSDARG00000074453	IPR006794, IPR007087, IPR015880	Transcrp_activ_Zfx/Zfy-dom, Znf_C2H2, Znf_C2H2-like	zfx
ENSDARG00000074456	IPR001214	SET_dom	SETD9
ENSDARG00000074468	IPR001214	SET_dom	prdm11
ENSDARG00000074498	IPR000330, IPR000953, IPR016197	SNF2_N, Chromo/shadow_dom, Chromodomain-like	chd9
ENSDARG00000074502	IPR004181	Znf_MIZ	zmiz1a
ENSDARG00000074526	IPR007087, IPR013069, IPR015880	Znf_C2H2, BTB_POZ, Znf_C2H2-like	zbtb16b
ENSDARG00000074544	IPR003656, IPR007087, IPR015880	Znf_BED, Znf_C2H2, Znf_C2H2-like	si:dkey-77f5.7
ENSDARG00000074548	IPR007087, IPR013069, IPR015880	Znf_C2H2, BTB_POZ, Znf_C2H2-like	zbtb17
ENSDARG00000074624	IPR007087, IPR015880	Znf_C2H2, Znf_C2H2-like	si:ch211-198a12.6
ENSDARG00000074634	IPR013069	BTB_POZ	keap1b
ENSDARG00000074636	IPR008984	SMAD_FHA_domain	cep170b
ENSDARG00000074752	IPR004827	bZIP	hlfa
ENSDARG00000074758	IPR002059, IPR011129	CSP_DNA-bd, Cold_shock_prot	csde1
ENSDARG00000074768	IPR007087, IPR015880	Znf_C2H2, Znf_C2H2-like	zgc:113295
ENSDARG00000074804	IPR013243	SCA7_dom	atxn7
ENSDARG00000074820	IPR007087, IPR015880	Znf_C2H2, Znf_C2H2-like	si:dkey-253d23.9
ENSDARG00000074828	IPR013069	BTB_POZ	RHOBTB2 (1 of 2)
ENSDARG00000074829	IPR008984	SMAD_FHA_domain	rasip1
ENSDARG00000074836	IPR001214, IPR003606, IPR003616, IPR007728	SET_dom, Pre-SET_Zn-bd_sub, Post-SET_dom, Pre-SET_dom	setmar
ENSDARG00000074843	IPR008984	SMAD_FHA_domain	phldb2b
ENSDARG00000074897	IPR011598	bHLH_dom	hes2.1
ENSDARG00000074906	IPR007087, IPR015880	Znf_C2H2, Znf_C2H2-like	znf831
ENSDARG00000074996	IPR003888, IPR003889	FYrich_N, FYrich_C	tbrg1
ENSDARG00000075015	IPR011256	Reg_factor_effector_dom	soul5
ENSDARG00000075024	IPR008984	SMAD_FHA_domain	si:ch73-375g18.1
ENSDARG00000075107	IPR001356, IPR009057	Homeobox_dom, Homeodomain-like	nkx2.4a
ENSDARG00000075111	IPR000408	Reg_chr_condens	als2a
ENSDARG00000075113	IPR001356, IPR009057	Homeobox_dom, Homeodomain-like	nanog
ENSDARG00000075116	IPR007087, IPR015880	Znf_C2H2, Znf_C2H2-like	sall2
ENSDARG00000075139	IPR000286, IPR017320	His_deacetylse, Histone_deAcase_II_euk	hdac5
ENSDARG00000075140	IPR000182	GNAT_dom	CR318653.1
ENSDARG00000075170	IPR001594	Znf_DHHC_palmitoyltrfase	zdhhc22
ENSDARG00000075194	IPR007087, IPR015880	Znf_C2H2, Znf_C2H2-like
ENSDARG00000075211	IPR000330, IPR000953, IPR016197	SNF2_N, Chromo/shadow_dom, Chromodomain-like	chd7
ENSDARG00000075225	IPR001594	Znf_DHHC_palmitoyltrfase	si:ch211-223a10.1
ENSDARG00000075226	IPR001132, IPR003619, IPR008984, IPR013019	SMAD_dom_Dwarfin-type, MAD_homology1_Dwarfin-type, SMAD_FHA_domain, MAD_homology_MH1	SMAD4 (2 of 2)
ENSDARG00000075230	IPR002857	Znf_CXXC	tet1
ENSDARG00000075252	IPR001965	Znf_PHD	phrf1
ENSDARG00000075269	IPR006612	Znf_C2CH	si:dkey-20i10.7
ENSDARG00000075274	IPR000818	TEA/ATTS	TEAD4
ENSDARG00000075295	IPR000007	Tubby_C	tulp1a
ENSDARG00000075330	IPR001356, IPR009057	Homeobox_dom, Homeodomain-like	phox2ba
ENSDARG00000075347	IPR008984	SMAD_FHA_domain	chfr
ENSDARG00000075366	IPR004823	TAF_TATA-bd	HIST2H4A
ENSDARG00000075389	IPR000408	Reg_chr_condens	si:ch211-281g13.4
ENSDARG00000075417	IPR007087, IPR015880	Znf_C2H2, Znf_C2H2-like	zgc:175107
ENSDARG00000075450	IPR001356, IPR008422, IPR009057	Homeobox_dom, Homeobox_KN_domain, Homeodomain-like	mkxa
ENSDARG00000075461	IPR001214	SET_dom	suv420h2
ENSDARG00000075470	IPR007087, IPR015880	Znf_C2H2, Znf_C2H2-like	zgc:110238
ENSDARG00000075509	IPR001965, IPR008984	Znf_PHD, SMAD_FHA_domain	phf12b
ENSDARG00000075533	IPR007087, IPR013069, IPR015880	Znf_C2H2, BTB_POZ, Znf_C2H2-like	zbtb24
ENSDARG00000075542	IPR001356, IPR007087, IPR009057, IPR015880	Homeobox_dom, Znf_C2H2, Homeodomain-like, Znf_C2H2-like	zfhx4
ENSDARG00000075543	IPR000330, IPR000953, IPR016197	SNF2_N, Chromo/shadow_dom, Chromodomain-like	chd8
ENSDARG00000075545	IPR007087, IPR015880	Znf_C2H2, Znf_C2H2-like	ZNF646 (2 of 2)
ENSDARG00000075560	IPR000637, IPR001214, IPR001965, IPR003616, IPR003888, IPR003889, IPR009071	HMGI/Y_DNA-bd_CS, SET_dom, Znf_PHD, Post-SET_dom, FYrich_N, FYrich_C, HMG_box_dom	kmt2cb
ENSDARG00000075561	IPR000182	GNAT_dom	si:dkey-76k16.5
ENSDARG00000075612	IPR000330	SNF2_N	ercc6
ENSDARG00000075616	IPR006591	RNAP_P/RPABC4	polr2k
ENSDARG00000075639	IPR007087, IPR015880	Znf_C2H2, Znf_C2H2-like	si:ch211-89o9.6
ENSDARG00000075666	IPR000580	TSC-22_Dip_Bun	tsc22d3
ENSDARG00000075670	IPR000679, IPR000949, IPR001005, IPR009057	Znf_GATA, ELM2_dom, SANT/Myb, Homeodomain-like	rereb
ENSDARG00000075713	IPR000047, IPR001356, IPR003654, IPR009057	HTH_motif, Homeobox_dom, OAR_dom, Homeodomain-like	shox2
ENSDARG00000075721	IPR001594	Znf_DHHC_palmitoyltrfase	zdhhc6
ENSDARG00000075732	IPR003894, IPR007900	TAFH_NHR1, TAF4	taf4b
ENSDARG00000075735	IPR002857	Znf_CXXC	cxxc5b
ENSDARG00000075774	IPR001766	TF_fork_head	foxj3
ENSDARG00000075783	IPR009071	HMG_box_dom	hmgxb4a
ENSDARG00000075785	IPR000408	Reg_chr_condens
ENSDARG00000075805	IPR003894, IPR007900	TAFH_NHR1, TAF4	si:dkey-219c3.2
ENSDARG00000075821	IPR002909	IPT	plxnb1a
ENSDARG00000075823	IPR007087	Znf_C2H2	ZNF608
ENSDARG00000075834	IPR007087, IPR015880	Znf_C2H2, Znf_C2H2-like	si:dkey-182i3.8
ENSDARG00000075867	IPR004018	RPEL_repeat	mkl1a
ENSDARG00000075884	IPR000330, IPR001965	SNF2_N, Znf_PHD	shprh
ENSDARG00000075887	IPR000408	Reg_chr_condens	herc3
ENSDARG00000075891	IPR007087, IPR015880	Znf_C2H2, Znf_C2H2-like	sall1b
ENSDARG00000075904	IPR003150	DNA-bd_RFX	rfx1b
ENSDARG00000075916	IPR000953, IPR007087, IPR015880, IPR016197	Chromo/shadow_dom, Znf_C2H2, Znf_C2H2-like, Chromodomain-like	zgc:66472
ENSDARG00000075928	IPR007087, IPR015880	Znf_C2H2, Znf_C2H2-like	hivep3a
ENSDARG00000075952	IPR001739, IPR016177	Methyl_CpG_DNA-bd, DNA-bd_dom	mbd2
ENSDARG00000076010	IPR011598	bHLH_dom	twist1b
ENSDARG00000076054	IPR007087, IPR015880	Znf_C2H2, Znf_C2H2-like	zgc:174694
ENSDARG00000076082	IPR006612	Znf_C2CH	CABZ01041962.1
ENSDARG00000076088	IPR007889	HTH_Psq	CABZ01032351.1
ENSDARG00000076094	IPR013069	BTB_POZ	klhl30
ENSDARG00000076120	IPR001766	TF_fork_head	foxp4
ENSDARG00000076134	IPR007087, IPR015880	Znf_C2H2, Znf_C2H2-like	zgc:162972
ENSDARG00000076160	IPR001214	SET_dom	si:dkey-285e18.2
ENSDARG00000076171	IPR007087, IPR015880	Znf_C2H2, Znf_C2H2-like	znf827
ENSDARG00000076182	IPR008967, IPR013801, IPR015988	p53-like_TF_DNA-bd, STAT_TF_DNA-bd, STAT_TF_coiled-coil	stat1b
ENSDARG00000076202	IPR001594	Znf_DHHC_palmitoyltrfase	ZDHHC11
ENSDARG00000076214	IPR007087, IPR015880	Znf_C2H2, Znf_C2H2-like	zgc:165514
ENSDARG00000076222	IPR007087, IPR015880	Znf_C2H2, Znf_C2H2-like	zgc:174224
ENSDARG00000076229	IPR004018	RPEL_repeat	mkl1b
ENSDARG00000076251	IPR001346, IPR008984	Interferon_reg_fact_DNA-bd_dom, SMAD_FHA_domain	irf3
ENSDARG00000076252	IPR007087, IPR015880	Znf_C2H2, Znf_C2H2-like	si:dkey-247i3.1
ENSDARG00000076255	IPR007087, IPR015880	Znf_C2H2, Znf_C2H2-like	si:ch211-241n15.1
ENSDARG00000076259	IPR001699, IPR008967	TF_T-box, p53-like_TF_DNA-bd	tbr1a
ENSDARG00000076262	IPR000327, IPR001356, IPR009057, IPR010982, IPR013847, IPR016362	POU_specific, Homeobox_dom, Homeodomain-like, Lambda_DNA-bd_dom, POU, TF_POU_3	pou3f2b
ENSDARG00000076272	IPR007087, IPR015880	Znf_C2H2, Znf_C2H2-like	zgc:174697
ENSDARG00000076297	IPR002909, IPR008366, IPR008967, IPR011539	IPT, NFAT, p53-like_TF_DNA-bd, RHD	nfatc3a
ENSDARG00000076379	IPR004181	Znf_MIZ	nsmce2
ENSDARG00000076380	IPR007087, IPR013069, IPR015880	Znf_C2H2, BTB_POZ, Znf_C2H2-like	hnrnpa0l
ENSDARG00000076402	IPR000182	GNAT_dom	si:ch211-138a11.5
ENSDARG00000076437	IPR006612	Znf_C2CH	zgc:163143
ENSDARG00000076440	IPR013069	BTB_POZ	btbd6a
ENSDARG00000076442	IPR007087, IPR015880	Znf_C2H2, Znf_C2H2-like	zgc:113098
ENSDARG00000076451	IPR001214, IPR007087, IPR015880	SET_dom, Znf_C2H2, Znf_C2H2-like	prdm2b
ENSDARG00000076472	IPR007087, IPR015880	Znf_C2H2, Znf_C2H2-like	ovol1
ENSDARG00000076509	IPR006590	RNA_pol_II_Rpb4_core	polr2d
ENSDARG00000076512	IPR000418	Ets_dom	si:ch211-265g22.4
ENSDARG00000076520	IPR004826, IPR004827, IPR008917	bZIP_Maf, bZIP, TF_DNA-bd	MAF (2 of 2)
ENSDARG00000076533	IPR004826, IPR004827, IPR008917	bZIP_Maf, bZIP, TF_DNA-bd	nfe2l1b
ENSDARG00000076542	IPR007087, IPR009057, IPR015880	Znf_C2H2, Homeodomain-like, Znf_C2H2-like	pogzb
ENSDARG00000076552	IPR007087	Znf_C2H2	zgc:193801
ENSDARG00000076571	IPR007087, IPR015880	Znf_C2H2, Znf_C2H2-like	sp5a
ENSDARG00000076584	IPR007087, IPR013069, IPR015880	Znf_C2H2, BTB_POZ, Znf_C2H2-like	patz1
ENSDARG00000076585	IPR000571	Znf_CCCH	si:ch211-113e8.11
ENSDARG00000076632	IPR001594	Znf_DHHC_palmitoyltrfase	zdhhc12a
ENSDARG00000076657	IPR007087, IPR015880	Znf_C2H2, Znf_C2H2-like	plagl2
ENSDARG00000076679	IPR001965	Znf_PHD	RAI1
ENSDARG00000076763	IPR007087, IPR015880	Znf_C2H2, Znf_C2H2-like	sp2
ENSDARG00000076807	IPR007087, IPR015880	Znf_C2H2, Znf_C2H2-like	si:ch211-110e21.4
ENSDARG00000076857	IPR003650, IPR011598	Orange, bHLH_dom	her3
ENSDARG00000076867	IPR004018	RPEL_repeat	mkl2b
ENSDARG00000076920	IPR007087, IPR015880	Znf_C2H2, Znf_C2H2-like	ZNF335 (1 of 2)
ENSDARG00000076924	IPR000408	Reg_chr_condens	als2b
ENSDARG00000076930	IPR004823	TAF_TATA-bd	si:dkey-261m9.9
ENSDARG00000076939	IPR007087, IPR015880	Znf_C2H2, Znf_C2H2-like	znf451
ENSDARG00000076988	IPR007087	Znf_C2H2	znf839
ENSDARG00000077013	IPR007087, IPR015880	Znf_C2H2, Znf_C2H2-like	znf280d
ENSDARG00000077028	IPR000182	GNAT_dom	si:ch211-81n22.1
ENSDARG00000077038	IPR001025, IPR009071	BAH_dom, HMG_box_dom	pbrm1l
ENSDARG00000077052	IPR001025	BAH_dom	tnrc18
ENSDARG00000077060	IPR007087	Znf_C2H2	rbm6
ENSDARG00000077078	IPR007087, IPR015880	Znf_C2H2, Znf_C2H2-like	zgc:173726
ENSDARG00000077085	IPR007087, IPR015880	Znf_C2H2, Znf_C2H2-like	zgc:110821
ENSDARG00000077092	IPR000418	Ets_dom	elk4
ENSDARG00000077101	IPR007087, IPR013069, IPR015880	Znf_C2H2, BTB_POZ, Znf_C2H2-like	zbtb10
ENSDARG00000077120	IPR001606	ARID_dom	arid5a
ENSDARG00000077143	IPR007087, IPR015880	Znf_C2H2, Znf_C2H2-like	znf526
ENSDARG00000077205	IPR007087, IPR015880	Znf_C2H2, Znf_C2H2-like	zgc:153116
ENSDARG00000077226	IPR000330	SNF2_N	smarca4a
ENSDARG00000077237	IPR003150	DNA-bd_RFX	RFX7 (1 of 2)
ENSDARG00000077256	IPR000182	GNAT_dom	nat8l
ENSDARG00000077266	IPR000953	Chromo/shadow_dom	BX470200.1
ENSDARG00000077304	IPR000418, IPR003118	Ets_dom, Pointed_dom	erg
ENSDARG00000077353	IPR000679, IPR000949, IPR001005, IPR001025, IPR009057	Znf_GATA, ELM2_dom, SANT/Myb, BAH_dom, Homeodomain-like	rerea
ENSDARG00000077361	IPR001965, IPR004022	Znf_PHD, DDT_dom	bptf
ENSDARG00000077400	IPR007087	Znf_C2H2	rbm10
ENSDARG00000077404	IPR009110, IPR011598, IPR014920	Nuc_rcpt_coact, bHLH_dom, Nuc_rcpt_coact_Ncoa-typ	ncoa3
ENSDARG00000077425	IPR013069	BTB_POZ	NACC2
ENSDARG00000077428	IPR002909, IPR005559	IPT, CG-1_dom	camta1a
ENSDARG00000077431	IPR011598	bHLH_dom	si:ch73-196k8.2
ENSDARG00000077467	IPR009071	HMG_box_dom	sox10
ENSDARG00000077469	IPR007120, IPR007121, IPR007641, IPR007642, IPR007644, IPR007645	DNA-dir_RNA_pol_su2_6, RNA_pol_bsu_CS, RNA_pol_Rpb2_7, RNA_pol_Rpb2_2, RNA_pol_bsu_protrusion, RNA_pol_Rpb2_3	polr1b
ENSDARG00000077473	IPR002418, IPR011598, IPR012682	Tscrpt_reg_Myc, bHLH_dom, Tscrpt_reg_Myc_N	mych
ENSDARG00000077481	IPR000182	GNAT_dom	si:dkey-76k16.6
ENSDARG00000077544	IPR000571	Znf_CCCH	toe1
ENSDARG00000077546	IPR001594	Znf_DHHC_palmitoyltrfase	ZDHHC1
ENSDARG00000077581	IPR001005, IPR009057	SANT/Myb, Homeodomain-like	zzz3
ENSDARG00000077589	IPR001214	SET_dom	si:dkey-188c14.4
ENSDARG00000077712	IPR007087, IPR015880	Znf_C2H2, Znf_C2H2-like	zgc:113886
ENSDARG00000077762	IPR007087	Znf_C2H2	SLC2A4RG
ENSDARG00000077785	IPR004827	bZIP	atf5b
ENSDARG00000077799	IPR007087, IPR015880	Znf_C2H2, Znf_C2H2-like	EGR4
ENSDARG00000077811	IPR009071	HMG_box_dom	sox11a
ENSDARG00000077813	IPR011598	bHLH_dom	si:dkey-34f9.3
ENSDARG00000077817	IPR002857	Znf_CXXC	cxxc4
ENSDARG00000077823	IPR009071	HMG_box_dom	hmgxb3
ENSDARG00000077840	IPR001356, IPR008422, IPR009057	Homeobox_dom, Homeobox_KN_domain, Homeodomain-like	meis2b
ENSDARG00000077852	IPR000770, IPR010919	SAND_dom, SAND_dom-like	samd11
ENSDARG00000077897	IPR007087, IPR015880	Znf_C2H2, Znf_C2H2-like	znf296
ENSDARG00000077901	IPR000408	Reg_chr_condens	herc1
ENSDARG00000077915	IPR001356, IPR009057	Homeobox_dom, Homeodomain-like	lmx1al
ENSDARG00000077946	IPR001005, IPR009057	SANT/Myb, Homeodomain-like	smarcc2
ENSDARG00000077982	IPR000418, IPR003118	Ets_dom, Pointed_dom	elf3
ENSDARG00000077987	IPR007087, IPR015880	Znf_C2H2, Znf_C2H2-like	zfat
ENSDARG00000078001	IPR013069	BTB_POZ	kbtbd7
ENSDARG00000078004	IPR007087, IPR015880	Znf_C2H2, Znf_C2H2-like	drl
ENSDARG00000078018	IPR007087, IPR015880	Znf_C2H2, Znf_C2H2-like	ZNF70
ENSDARG00000078050	IPR001965	Znf_PHD	phf19
ENSDARG00000078066	IPR000418	Ets_dom	elk1
ENSDARG00000078133	IPR001965, IPR002857	Znf_PHD, Znf_CXXC	kdm2ab
ENSDARG00000078159	IPR007087, IPR015880	Znf_C2H2, Znf_C2H2-like	zgc:175284
ENSDARG00000078161	IPR001214, IPR007087, IPR015880	SET_dom, Znf_C2H2, Znf_C2H2-like	prdm1c
ENSDARG00000078164	IPR007087	Znf_C2H2	znf576.2
ENSDARG00000078191	IPR007087, IPR013069, IPR015880	Znf_C2H2, BTB_POZ, Znf_C2H2-like	zbtb46
ENSDARG00000078206	IPR000770, IPR010919	SAND_dom, SAND_dom-like	zgc:171506
ENSDARG00000078210	IPR000007	Tubby_C	tulp1b
ENSDARG00000078212	IPR007087, IPR015880	Znf_C2H2, Znf_C2H2-like	zgc:165515
ENSDARG00000078215	IPR007087	Znf_C2H2	rbsn
ENSDARG00000078238	IPR013069	BTB_POZ	nacc1
ENSDARG00000078256	IPR007087, IPR015880	Znf_C2H2, Znf_C2H2-like
ENSDARG00000078266	IPR011598	bHLH_dom	twist2
ENSDARG00000078279	IPR001766, IPR007087	TF_fork_head, Znf_C2H2	foxp3b
ENSDARG00000078280	IPR001356, IPR009057	Homeobox_dom, Homeodomain-like	nkx3-1
ENSDARG00000078281	IPR007087, IPR015880	Znf_C2H2, Znf_C2H2-like	zgc:173575
ENSDARG00000078310	IPR004022	DDT_dom	cecr2
ENSDARG00000078324	IPR001214, IPR007087, IPR015880	SET_dom, Znf_C2H2, Znf_C2H2-like	PRDM16
ENSDARG00000078327	IPR008984	SMAD_FHA_domain	CEP170B (2 of 2)
ENSDARG00000078348	IPR001965	Znf_PHD	tcf20
ENSDARG00000078355	IPR000571	Znf_CCCH	zc3h4
ENSDARG00000078388	IPR007087, IPR015880	Znf_C2H2, Znf_C2H2-like	glis2a
ENSDARG00000078416	IPR001356, IPR007087, IPR009057, IPR015880	Homeobox_dom, Znf_C2H2, Homeodomain-like, Znf_C2H2-like	zeb2b
ENSDARG00000078423	IPR009057	Homeodomain-like	zgc:194285
ENSDARG00000078434	IPR007087, IPR015880	Znf_C2H2, Znf_C2H2-like	znf692
ENSDARG00000078459	IPR001356, IPR003350, IPR009057, IPR010982	Homeobox_dom, CUT_dom, Homeodomain-like, Lambda_DNA-bd_dom	cux1a
ENSDARG00000078475	IPR013069	BTB_POZ	klhl23
ENSDARG00000078476	IPR007087, IPR015880	Znf_C2H2, Znf_C2H2-like	si:dkey-253d23.7
ENSDARG00000078541	IPR001356, IPR009057	Homeobox_dom, Homeodomain-like	CERS3 (2 of 2)
ENSDARG00000078552	IPR007604	CP2	grhl3
ENSDARG00000078576	IPR001214	SET_dom	setd5
ENSDARG00000078676	IPR008967	p53-like_TF_DNA-bd	myrf
ENSDARG00000078701	IPR001214, IPR007087, IPR015880	SET_dom, Znf_C2H2, Znf_C2H2-like	prdm13
ENSDARG00000078728	IPR007087, IPR015880	Znf_C2H2, Znf_C2H2-like	zgc:173710
ENSDARG00000078767	IPR005033	YEATS	yeats2
ENSDARG00000078781	IPR000116	HMGI/HMGY	si:ch211-161c3.6
ENSDARG00000078784	IPR001699, IPR008967, IPR011598	TF_T-box, p53-like_TF_DNA-bd, bHLH_dom	mgaa
ENSDARG00000078814	IPR006612, IPR007087, IPR015880	Znf_C2CH, Znf_C2H2, Znf_C2H2-like	si:dkey-34m19.3
ENSDARG00000078865	IPR002857	Znf_CXXC	cxxc5a
ENSDARG00000078894	IPR002052	DNA_methylase_N6_adenine_CS	hemk1
ENSDARG00000078954	IPR000003, IPR000536, IPR001628, IPR001723, IPR008946	Retinoid-X_rcpt/HNF4, Nucl_hrmn_rcpt_lig-bd_core, Znf_hrmn_rcpt, Str_hrmn_rcpt, Nucl_hormone_rcpt_ligand-bd	rxrba
ENSDARG00000078991	IPR000182	GNAT_dom	NAT8
ENSDARG00000079010	IPR007087, IPR015880	Znf_C2H2, Znf_C2H2-like	si:dkey-7i4.5
ENSDARG00000079012	IPR003894, IPR013289	TAFH_NHR1, ETO	CBFA2T3
ENSDARG00000079035	IPR007087, IPR015880	Znf_C2H2, Znf_C2H2-like	zgc:174573
ENSDARG00000079124	IPR003690	MTERF	MTERF4
ENSDARG00000079131	IPR013246	SAGA_su_Sgf11	si:dkeyp-118b1.2
ENSDARG00000079150	IPR009057	Homeodomain-like	si:ch211-276i12.9
ENSDARG00000079187	IPR001699, IPR002070, IPR008967	TF_T-box, TF_Brachyury, p53-like_TF_DNA-bd	tbx19
ENSDARG00000079201	IPR001356, IPR007087, IPR015880	Homeobox_dom, Znf_C2H2, Znf_C2H2-like	TSHZ2
ENSDARG00000079222	IPR007087, IPR015880	Znf_C2H2, Znf_C2H2-like	zgc:174315
ENSDARG00000079229	IPR007087, IPR015880	Znf_C2H2, Znf_C2H2-like	znf414
ENSDARG00000079233	IPR003316	E2F_WHTH_DNA-bd_dom	E2F2
ENSDARG00000079236	IPR007087, IPR015880	Znf_C2H2, Znf_C2H2-like	si:dkey-253d23.11
ENSDARG00000079263	IPR007087, IPR015880	Znf_C2H2, Znf_C2H2-like
ENSDARG00000079266	IPR001766	TF_fork_head	foxe1
ENSDARG00000079312	IPR001214, IPR001965, IPR003616, IPR003888, IPR003889, IPR009071	SET_dom, Znf_PHD, Post-SET_dom, FYrich_N, FYrich_C, HMG_box_dom	kmt2ca
ENSDARG00000079350	IPR007087, IPR015880	Znf_C2H2, Znf_C2H2-like	znf654
ENSDARG00000079373	IPR000837, IPR004827	AP-1, bZIP	fosl1b
ENSDARG00000079378	IPR008984	SMAD_FHA_domain	phldb1b
ENSDARG00000079382	IPR001356, IPR009057	Homeobox_dom, Homeodomain-like	hdx
ENSDARG00000079468	IPR013069	BTB_POZ	RHOBTB1
ENSDARG00000079547	IPR007087, IPR015880	Znf_C2H2, Znf_C2H2-like	zbtb47b
ENSDARG00000079575	IPR007797	TF_AF4/FMR2	aff3
ENSDARG00000079591	IPR014876	DEK_C	SSH3
ENSDARG00000079613	IPR007087, IPR015880	Znf_C2H2, Znf_C2H2-like	sall3a
ENSDARG00000079626	IPR000418	Ets_dom	elf2b
ENSDARG00000079631	IPR007087, IPR015880	Znf_C2H2, Znf_C2H2-like	ZFP91
ENSDARG00000079639	IPR011539	RHD	PRRC2B
ENSDARG00000079660	IPR001594	Znf_DHHC_palmitoyltrfase	ZDHHC21
ENSDARG00000079684	IPR004823	TAF_TATA-bd	taf6l
ENSDARG00000079686	IPR000182	GNAT_dom	naa30
ENSDARG00000079699	IPR001766	TF_fork_head	zgc:162612
ENSDARG00000079716	IPR013194	HDAC_interact	sin3aa
ENSDARG00000079731	IPR008984	SMAD_FHA_domain	kif13ba
ENSDARG00000079738	IPR007087, IPR015880	Znf_C2H2, Znf_C2H2-like	znf219
ENSDARG00000079760	IPR007087, IPR015880	Znf_C2H2, Znf_C2H2-like	zgc:112998
ENSDARG00000079779	IPR008984	SMAD_FHA_domain	radil
ENSDARG00000079791	IPR008984	SMAD_FHA_domain	si:ch211-176g6.2
ENSDARG00000079802	IPR000182	GNAT_dom	aanat2
ENSDARG00000079889	IPR008984	SMAD_FHA_domain	phldb2a
ENSDARG00000079922	IPR007087	Znf_C2H2	klf4
ENSDARG00000079947	IPR007087, IPR015880	Znf_C2H2, Znf_C2H2-like	gfi1b
ENSDARG00000079949	IPR013719, IPR013953	DUF1747, FACT_Spt16p	supt16h
ENSDARG00000079957	IPR010684	RNA_pol_II_trans_fac_SIII_A	FO904944.1
ENSDARG00000079964	IPR000047, IPR001356, IPR009057	HTH_motif, Homeobox_dom, Homeodomain-like	dlx2a
ENSDARG00000079972	IPR002909, IPR008366, IPR008967, IPR011539	IPT, NFAT, p53-like_TF_DNA-bd, RHD	NFATC2 (1 of 2)
ENSDARG00000080009	IPR001025	BAH_dom	bahcc1
ENSDARG00000080016	IPR007087, IPR015880	Znf_C2H2, Znf_C2H2-like	ZFP28 (4 of 19)
ENSDARG00000080018	IPR008984	SMAD_FHA_domain	kif16bb
ENSDARG00000080021	IPR015880	Znf_C2H2-like	zmat3
ENSDARG00000082979	IPR001739, IPR001965, IPR004022, IPR016177	Methyl_CpG_DNA-bd, Znf_PHD, DDT_dom, DNA-bd_dom	BAZ2B (2 of 2)
ENSDARG00000086041	IPR007087, IPR015880	Znf_C2H2, Znf_C2H2-like	zgc:174650
ENSDARG00000086055	IPR001766	TF_fork_head	si:dkey-7e14.3
ENSDARG00000086107	IPR003690	MTERF	MTERF1
ENSDARG00000086126	IPR001965	Znf_PHD	trim33l
ENSDARG00000086162	IPR007087, IPR015880	Znf_C2H2, Znf_C2H2-like	ZNF385D
ENSDARG00000086173	IPR000451, IPR002909, IPR008967, IPR011539	NFkB/Dor, IPT, p53-like_TF_DNA-bd, RHD	relb
ENSDARG00000086182	IPR003656, IPR007087, IPR015880	Znf_BED, Znf_C2H2, Znf_C2H2-like	si:dkey-54f18.1
ENSDARG00000086222	IPR000182	GNAT_dom	NAT16
ENSDARG00000086223	IPR007087, IPR015880	Znf_C2H2, Znf_C2H2-like	si:ch73-144d13.4
ENSDARG00000086245	IPR007087, IPR015880	Znf_C2H2, Znf_C2H2-like	si:dkeyp-121d2.7
ENSDARG00000086296	IPR007087, IPR015880	Znf_C2H2, Znf_C2H2-like	si:ch211-209p16.1
ENSDARG00000086345	IPR001356, IPR003350, IPR009057, IPR010982	Homeobox_dom, CUT_dom, Homeodomain-like, Lambda_DNA-bd_dom	cux2b
ENSDARG00000086362	IPR000327, IPR001356, IPR009057, IPR010982, IPR013847	POU_specific, Homeobox_dom, Homeodomain-like, Lambda_DNA-bd_dom, POU	pou6f2
ENSDARG00000086393	IPR000047, IPR001356, IPR009057	HTH_motif, Homeobox_dom, Homeodomain-like	dbx1a
ENSDARG00000086405	IPR003690	MTERF	mterf2
ENSDARG00000086449	IPR007087, IPR015880	Znf_C2H2, Znf_C2H2-like	si:dkey-247i3.4
ENSDARG00000086458	IPR000286	His_deacetylse	hdac10
ENSDARG00000086459	IPR001965	Znf_PHD	si:ch211-165g14.1
ENSDARG00000086463	IPR013069	BTB_POZ	klhl13
ENSDARG00000086494	IPR003656, IPR007087, IPR015880	Znf_BED, Znf_C2H2, Znf_C2H2-like	si:dkey-7i4.2
ENSDARG00000086555	IPR004823	TAF_TATA-bd	si:ch211-113a14.17
ENSDARG00000086614	IPR004823	TAF_TATA-bd
ENSDARG00000086626	IPR007087, IPR015880	Znf_C2H2, Znf_C2H2-like	im:7147486
ENSDARG00000086631	IPR007087, IPR015880	Znf_C2H2, Znf_C2H2-like	rnh1
ENSDARG00000086668	IPR007087, IPR015880	Znf_C2H2, Znf_C2H2-like	si:dkey-7j22.4
ENSDARG00000086720	IPR007087, IPR015880	Znf_C2H2, Znf_C2H2-like	zgc:173603
ENSDARG00000086744	IPR007087, IPR015880	Znf_C2H2, Znf_C2H2-like	si:dkeyp-79b7.9
ENSDARG00000086764	IPR008984	SMAD_FHA_domain	MDC1
ENSDARG00000086789	IPR001025	BAH_dom	bahd1
ENSDARG00000086825	IPR007087, IPR015880	Znf_C2H2, Znf_C2H2-like	ZNF521 (1 of 2)
ENSDARG00000086831	IPR007087, IPR015880	Znf_C2H2, Znf_C2H2-like	BX000701.1
ENSDARG00000086839	IPR007087, IPR015880	Znf_C2H2, Znf_C2H2-like	BX324216.1
ENSDARG00000086892	IPR000418	Ets_dom	erfl1
ENSDARG00000086944	IPR011598	bHLH_dom	TCF24
ENSDARG00000086977	IPR013723	Ataxin-1_HBP1	atxn1l
ENSDARG00000086980	IPR001739	Methyl_CpG_DNA-bd	mbd6
ENSDARG00000086998	IPR000940	NNMT_TEMT_trans	NNMT
ENSDARG00000087046	IPR007087, IPR015880	Znf_C2H2, Znf_C2H2-like	si:ch211-222k6.2
ENSDARG00000087070	IPR007087, IPR015880	Znf_C2H2, Znf_C2H2-like	si:dkey-122c11.9
ENSDARG00000087074	IPR007087, IPR015880	Znf_C2H2, Znf_C2H2-like	znf574
ENSDARG00000087092	IPR000536, IPR008946	Nucl_hrmn_rcpt_lig-bd_core, Nucl_hormone_rcpt_ligand-bd	CABZ01057488.1
ENSDARG00000087094	IPR001766	TF_fork_head	foxa
ENSDARG00000087166	IPR011598	bHLH_dom	figla
ENSDARG00000087168	IPR007087, IPR015880	Znf_C2H2, Znf_C2H2-like	si:ch211-162i8.4
ENSDARG00000087181	IPR000953, IPR016197	Chromo/shadow_dom, Chromodomain-like	cbx7b
ENSDARG00000087185	IPR007087, IPR015880	Znf_C2H2, Znf_C2H2-like	CABZ01069006.1
ENSDARG00000087186	IPR001356, IPR009057	Homeobox_dom, Homeodomain-like	ZHX3 (2 of 2)
ENSDARG00000087188	IPR004827	bZIP	nfil3-6
ENSDARG00000087195	IPR000536, IPR001628, IPR001723, IPR003079, IPR008946	Nucl_hrmn_rcpt_lig-bd_core, Znf_hrmn_rcpt, Str_hrmn_rcpt, ROR_rcpt, Nucl_hormone_rcpt_ligand-bd	rorc
ENSDARG00000087201	IPR007087, IPR015880	Znf_C2H2, Znf_C2H2-like	CABZ01001457.1
ENSDARG00000087212	IPR007087, IPR015880	Znf_C2H2, Znf_C2H2-like	CU655961.2
ENSDARG00000087226	IPR013069	BTB_POZ	kbtbd2
ENSDARG00000087236	IPR004823	TAF_TATA-bd	HIST1H4A
ENSDARG00000087249	IPR007087, IPR015880	Znf_C2H2, Znf_C2H2-like	si:dkey-7i4.17
ENSDARG00000087290	IPR007087, IPR015880	Znf_C2H2, Znf_C2H2-like	si:ch211-202h22.10
ENSDARG00000087303	IPR004827, IPR016468	bZIP, CCAAT/enhancer-binding	cebpd
ENSDARG00000087327	IPR000953, IPR016197	Chromo/shadow_dom, Chromodomain-like	cbx8a
ENSDARG00000087330	IPR007087, IPR015880	Znf_C2H2, Znf_C2H2-like	maza
ENSDARG00000087378	IPR007087, IPR015880	Znf_C2H2, Znf_C2H2-like	zgc:162962
ENSDARG00000087381	IPR011598	bHLH_dom	tcf23
ENSDARG00000087387	IPR007087, IPR015880	Znf_C2H2, Znf_C2H2-like	si:dkey-256i11.1
ENSDARG00000087394	IPR001356, IPR007087, IPR015880	Homeobox_dom, Znf_C2H2, Znf_C2H2-like	tshz3a
ENSDARG00000087417	IPR001594	Znf_DHHC_palmitoyltrfase	zdhhc5b
ENSDARG00000087438	IPR000418	Ets_dom	si:dkey-257i7.5
ENSDARG00000087442	IPR007087, IPR015880	Znf_C2H2, Znf_C2H2-like	si:ch211-208f21.5
ENSDARG00000087453	IPR007087, IPR015880	Znf_C2H2, Znf_C2H2-like	si:ch73-57f22.2
ENSDARG00000087472	IPR004823	TAF_TATA-bd
ENSDARG00000087483	IPR006612, IPR007087, IPR015880	Znf_C2CH, Znf_C2H2, Znf_C2H2-like	si:dkey-226l10.6
ENSDARG00000087517	IPR013069	BTB_POZ	btbd3b
ENSDARG00000087528	IPR008984	SMAD_FHA_domain	snip1
[truncated: 1,327 more rows]
